# Supplementary material for: Chromosome-associated RNA–protein complexes promote pairing of homologous chromosomes during meiosis in Schizosaccharomyces pombe
Source: PubMed Central journal article supplement (PMC6898681; doi:10.1038/s41467-019-13609-0), 2019-12-06

I\_1\_1

— coding  
— noncoding

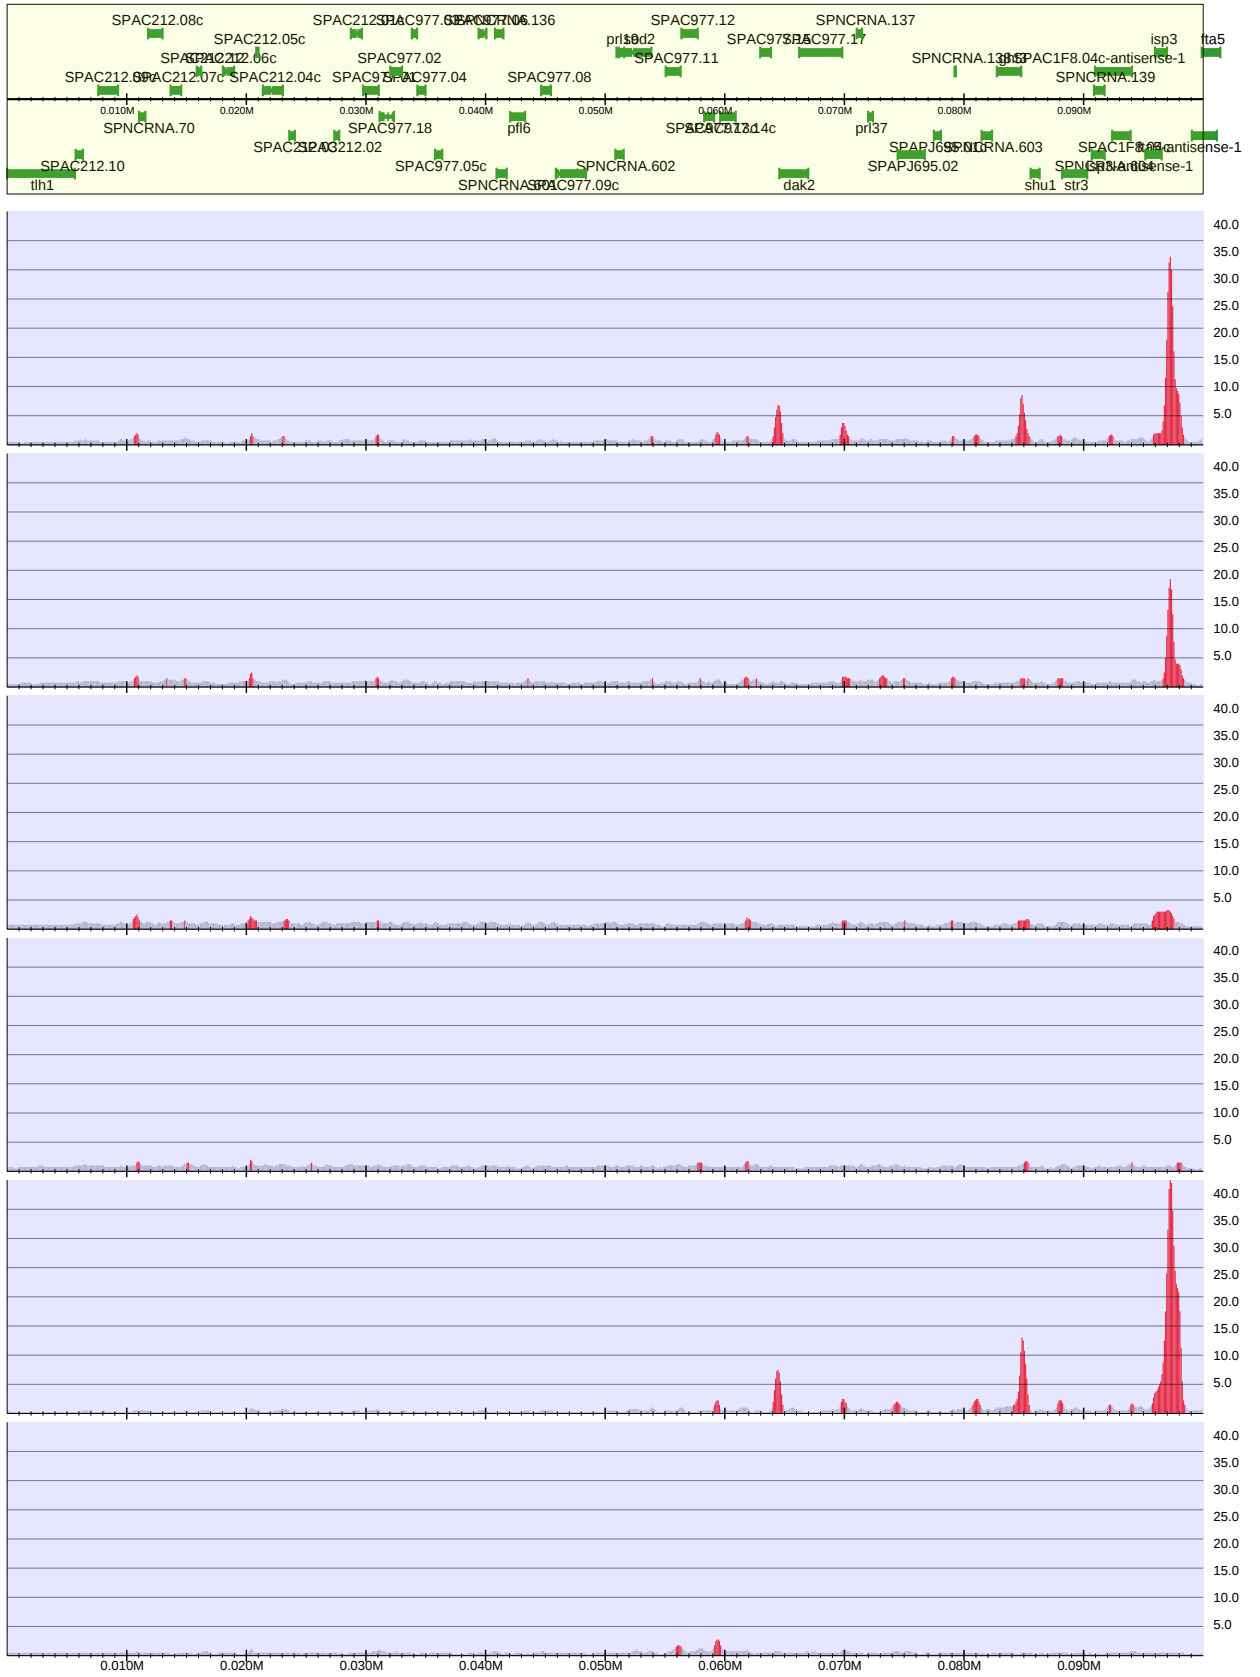

I\_1\_2

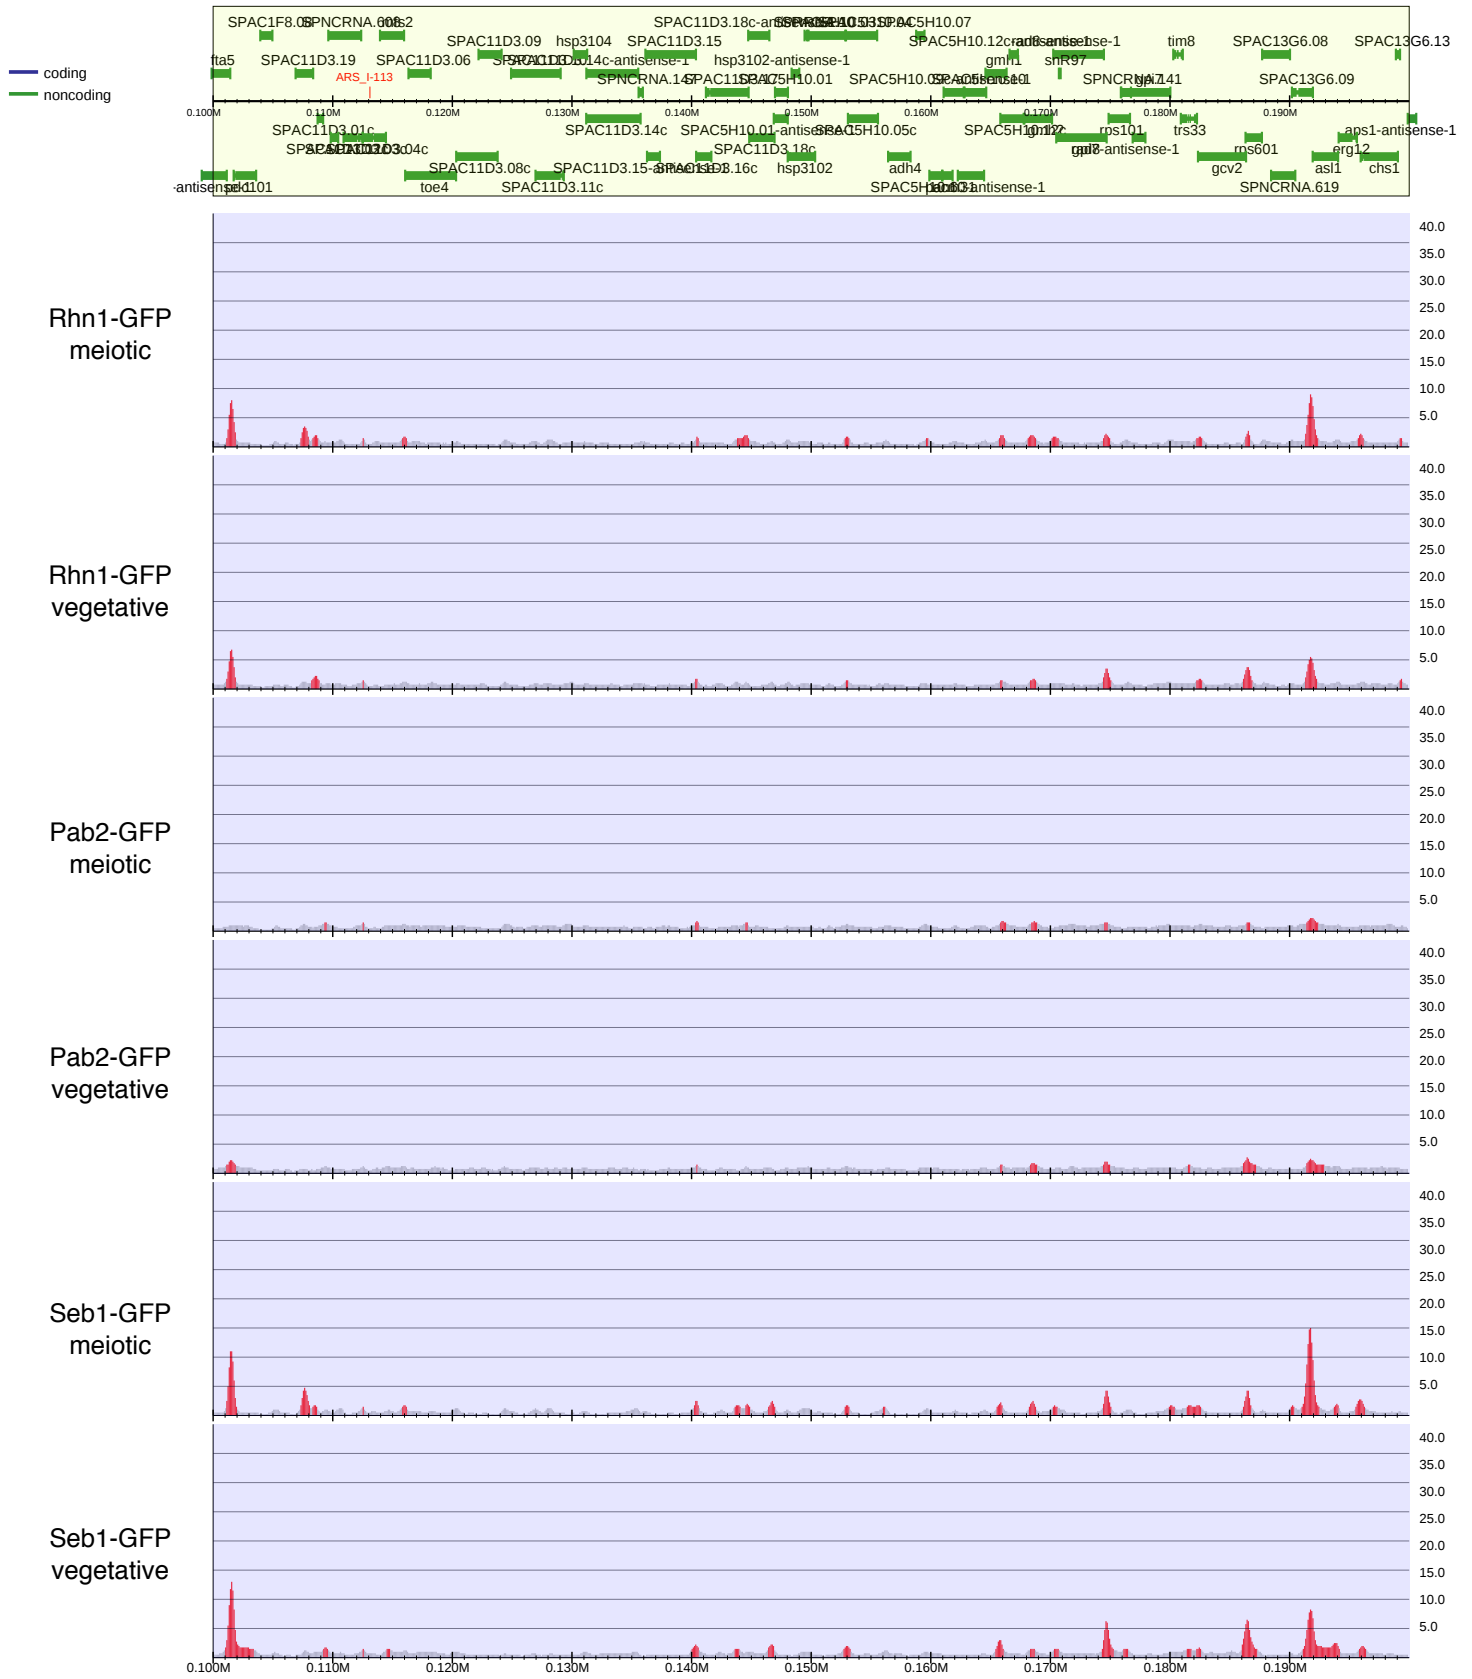

I\_1\_3

coding  
noncoding

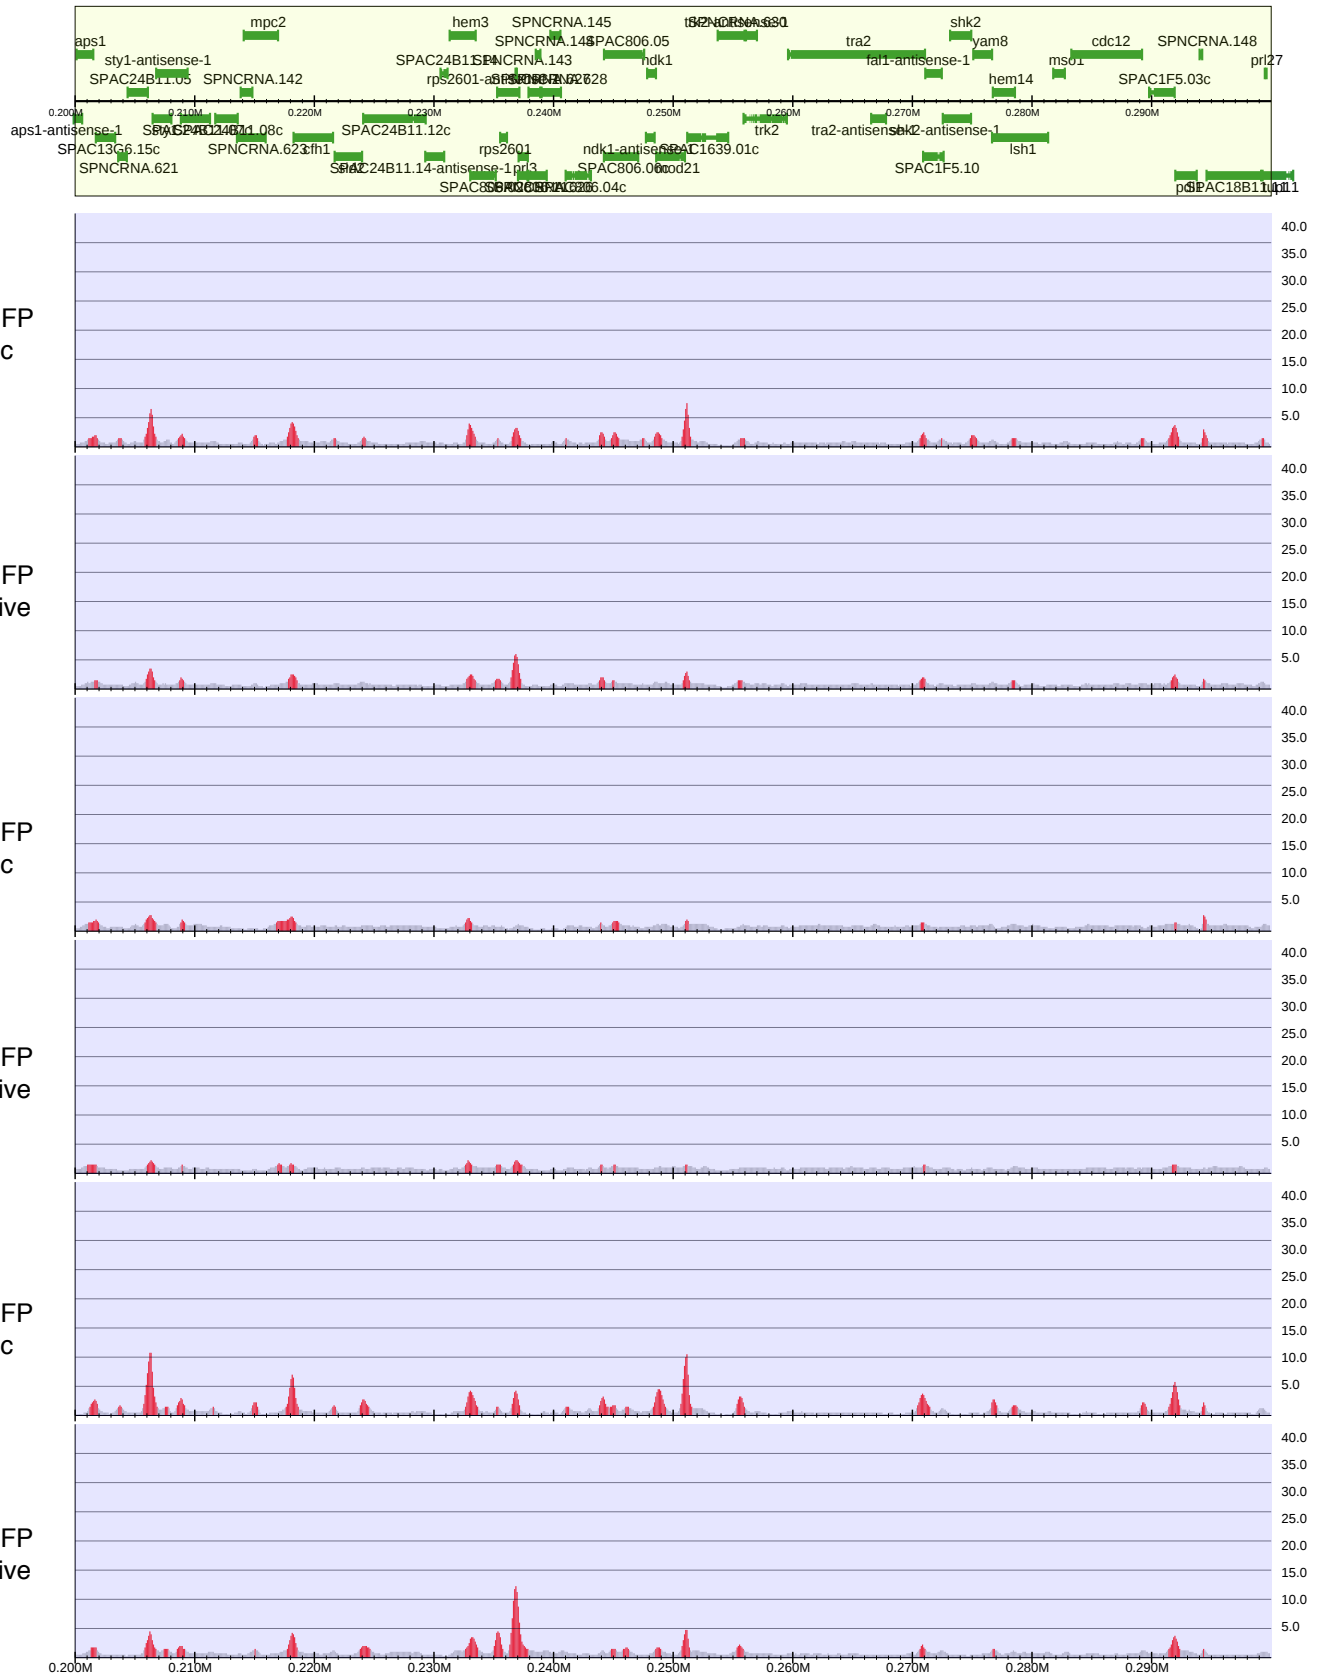

I\_1\_4

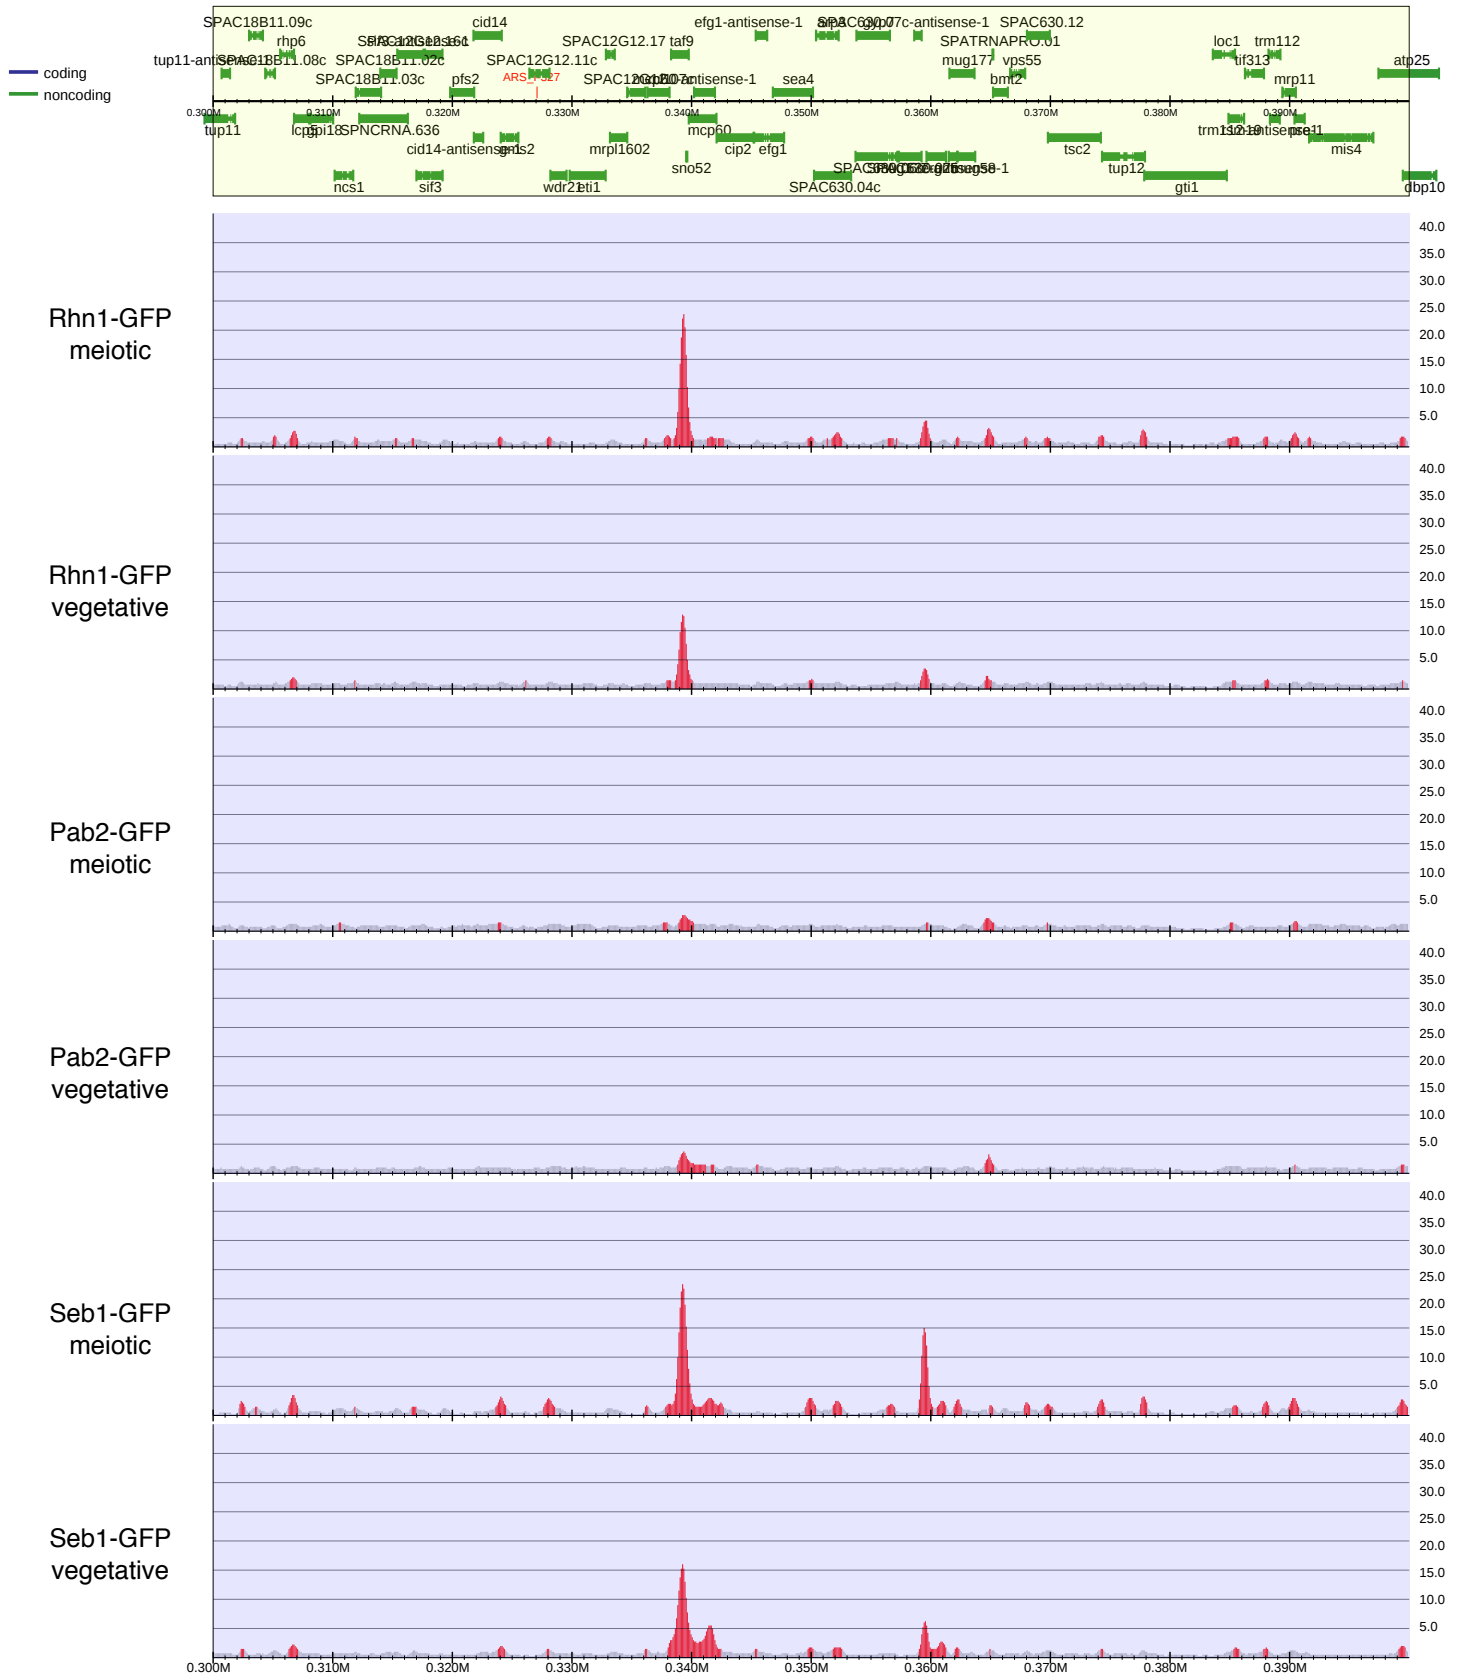



I\_1\_5

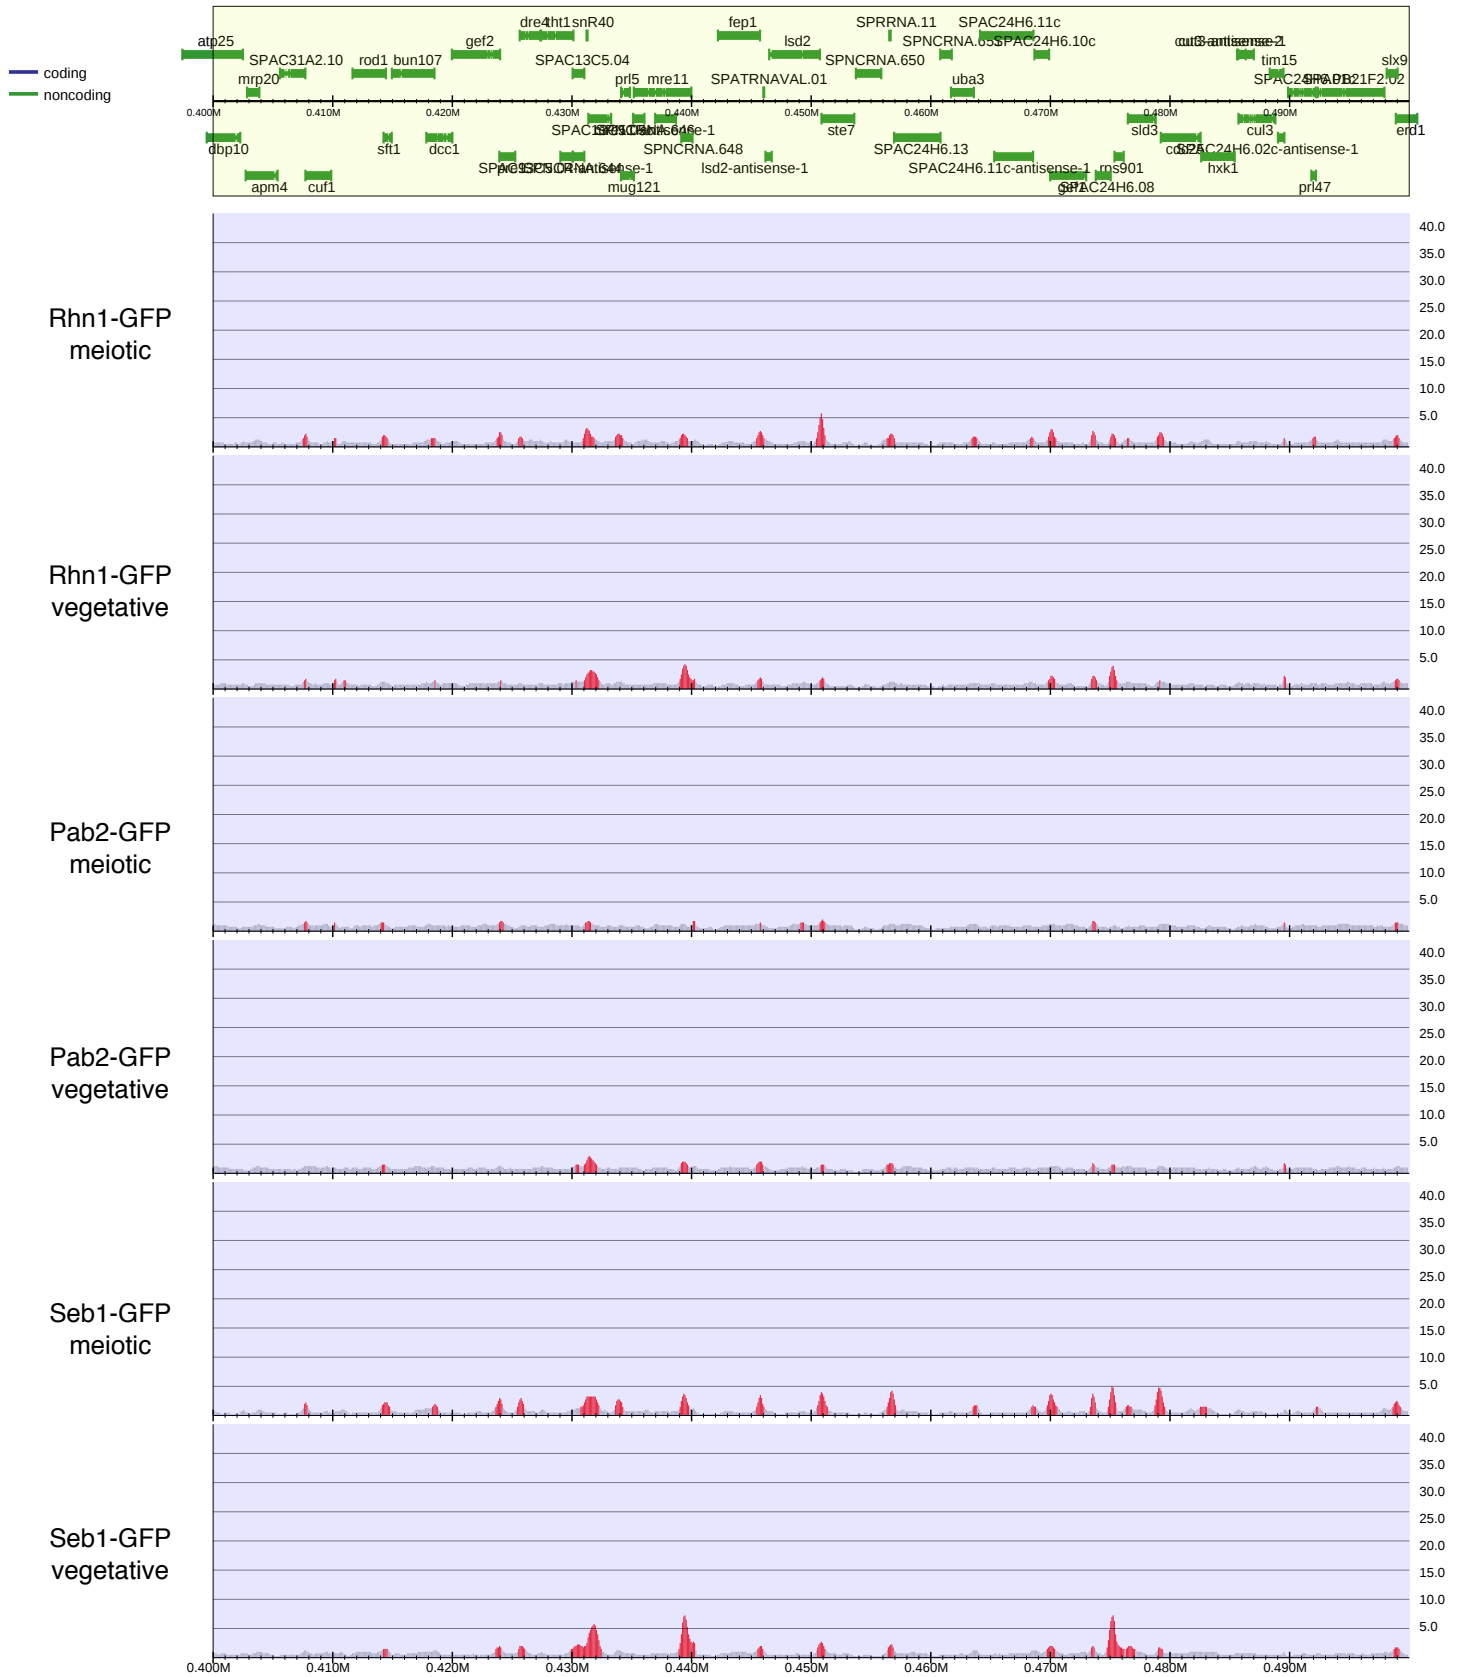

I\_1\_6

coding  
noncoding

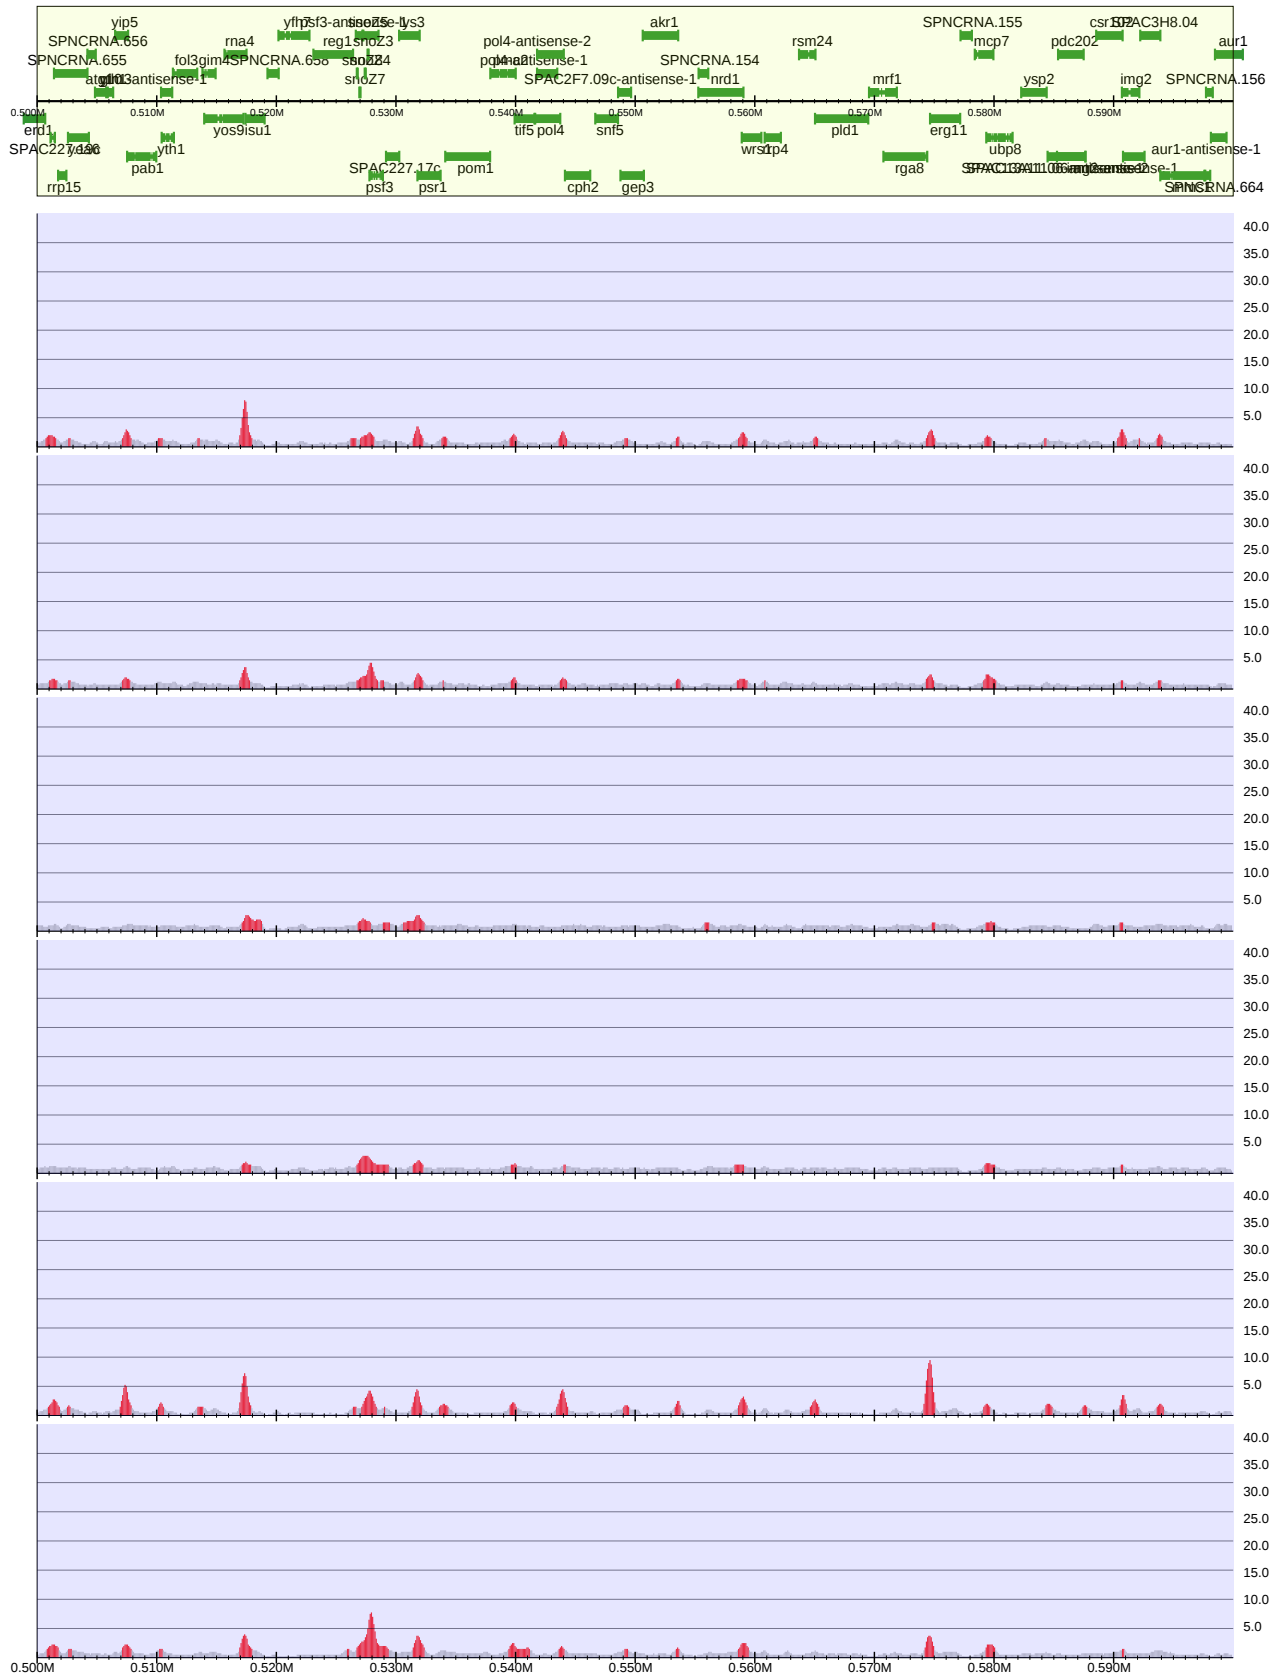

I\_1\_7

coding  
noncoding

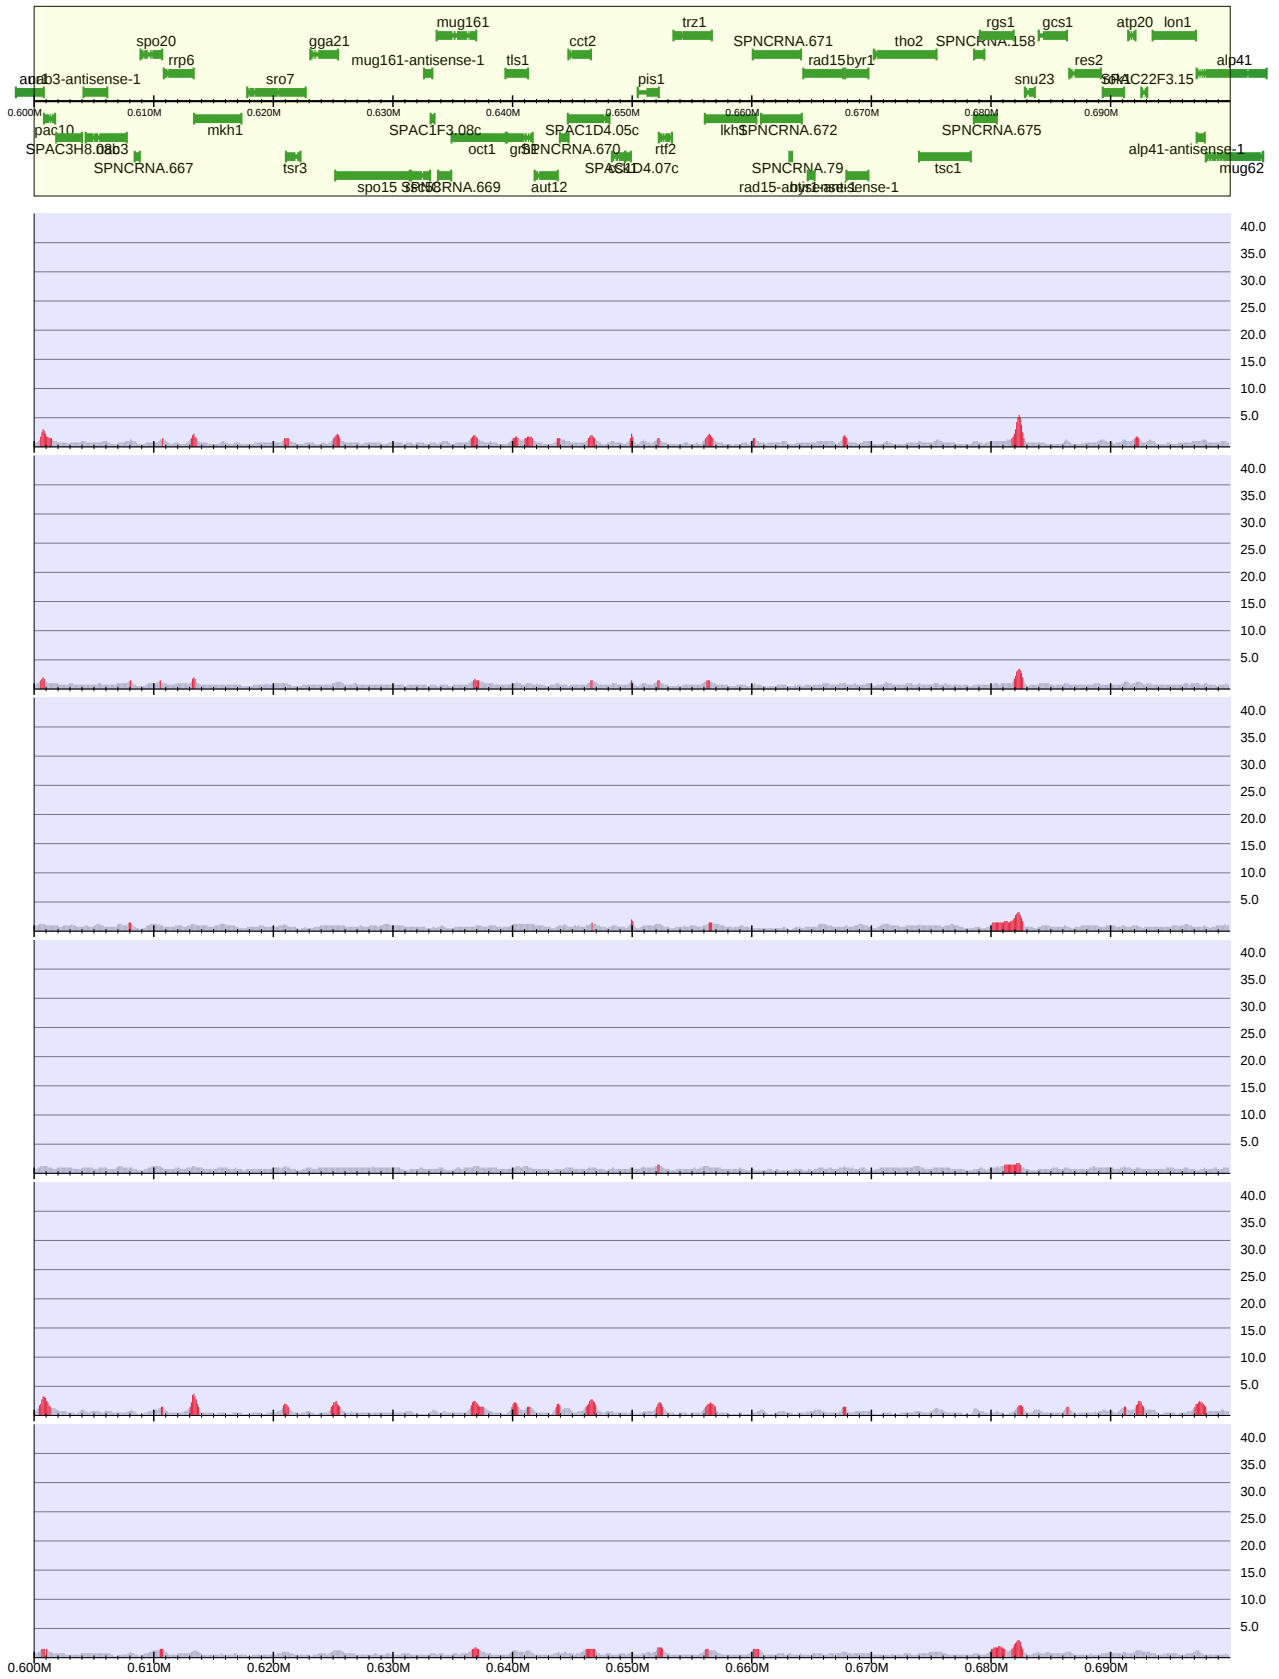

I\_1\_8

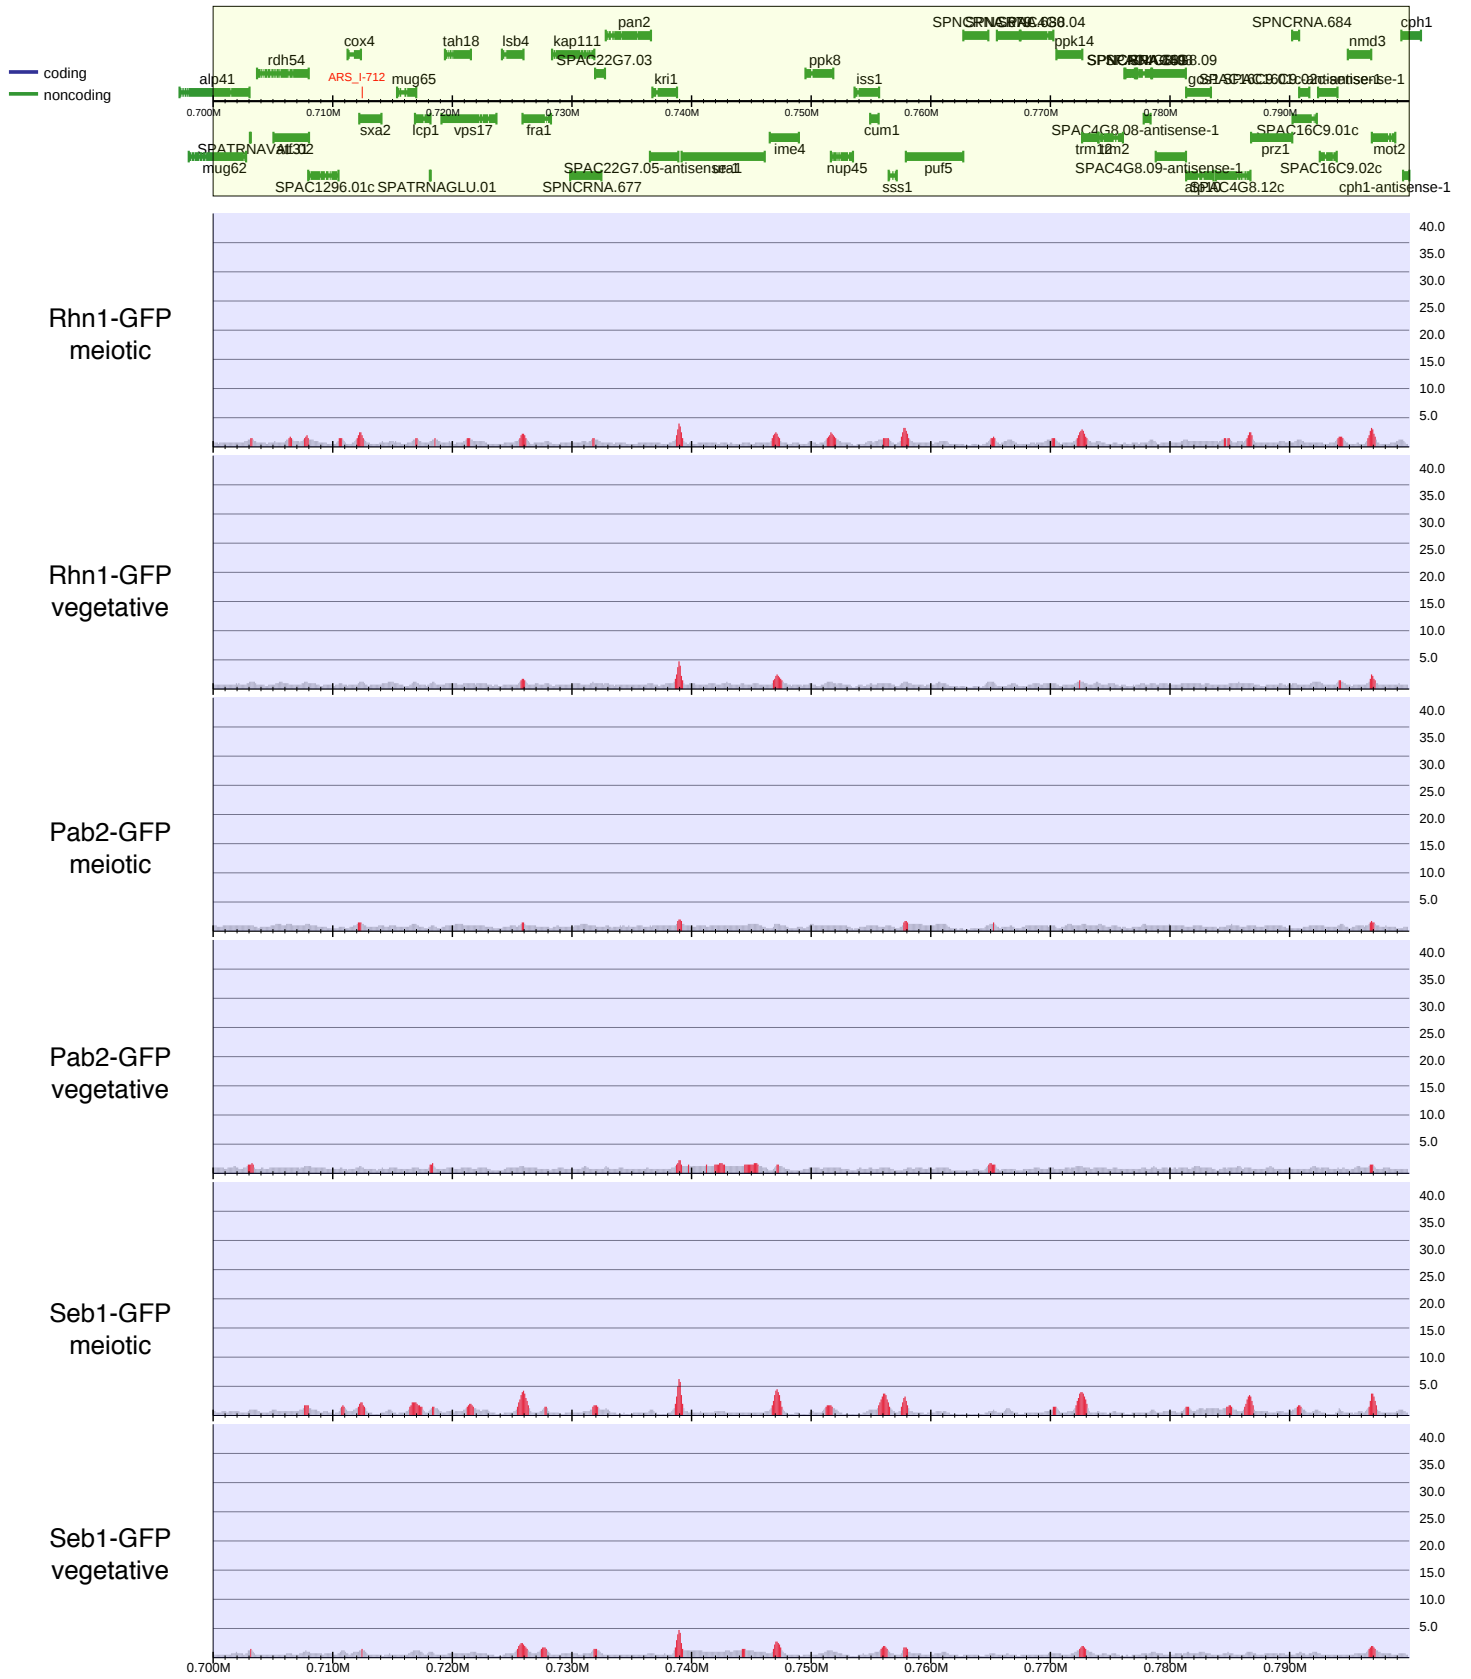

I\_1\_9

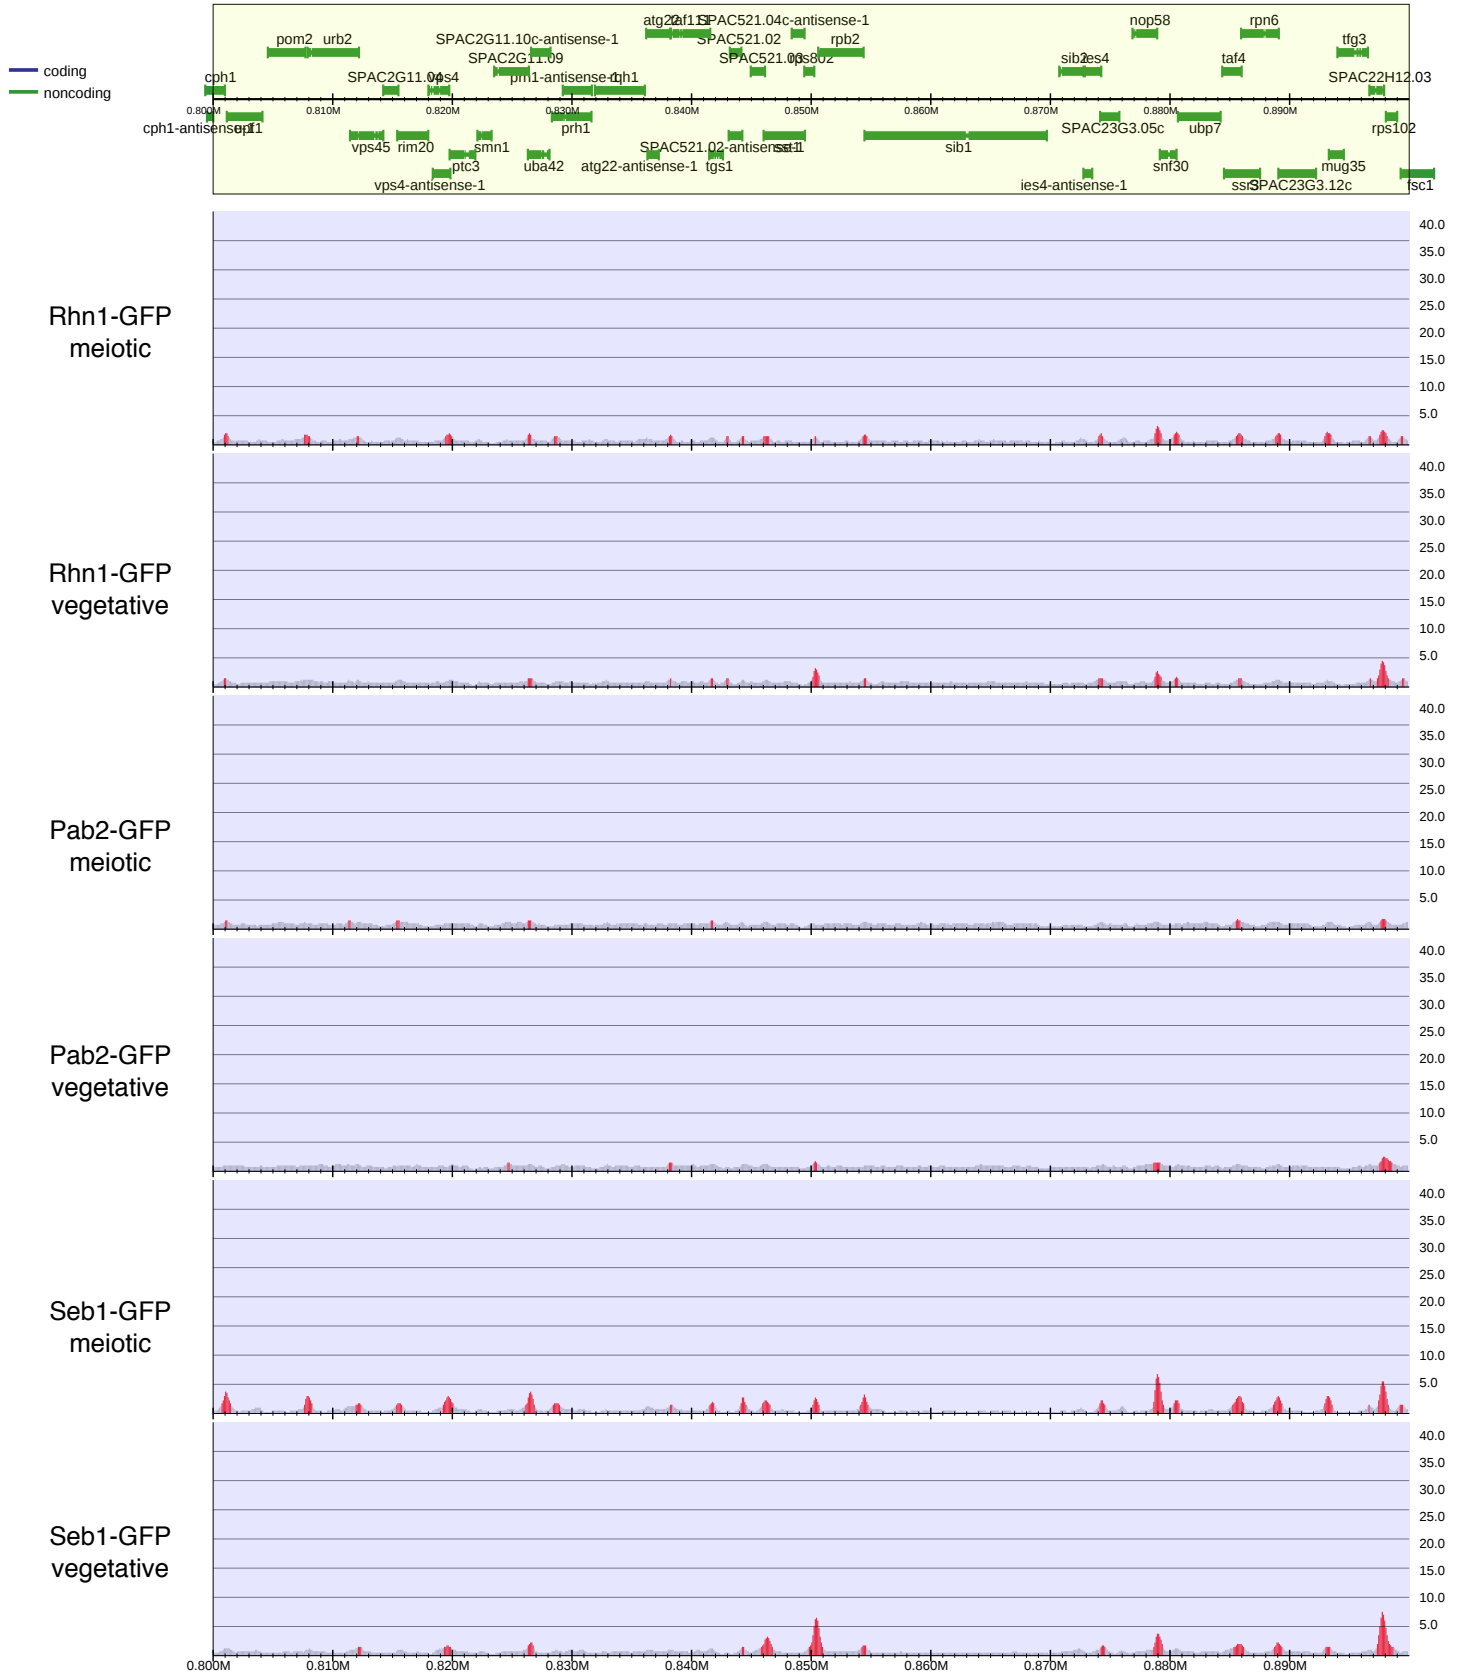

I\_1\_10

— coding  
— noncoding

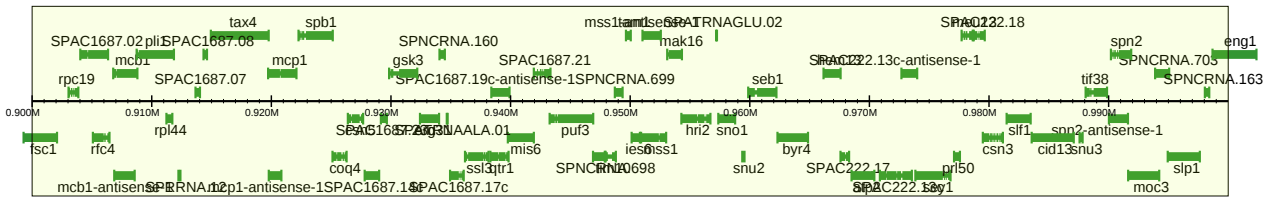

Rhn1-GFP  
meiotic

Rhn1-GFP  
vegetative

Pab2-GFP  
meiotic

Pab2-GFP  
vegetative

Seb1-GFP  
meiotic

Seb1-GFP  
vegetative

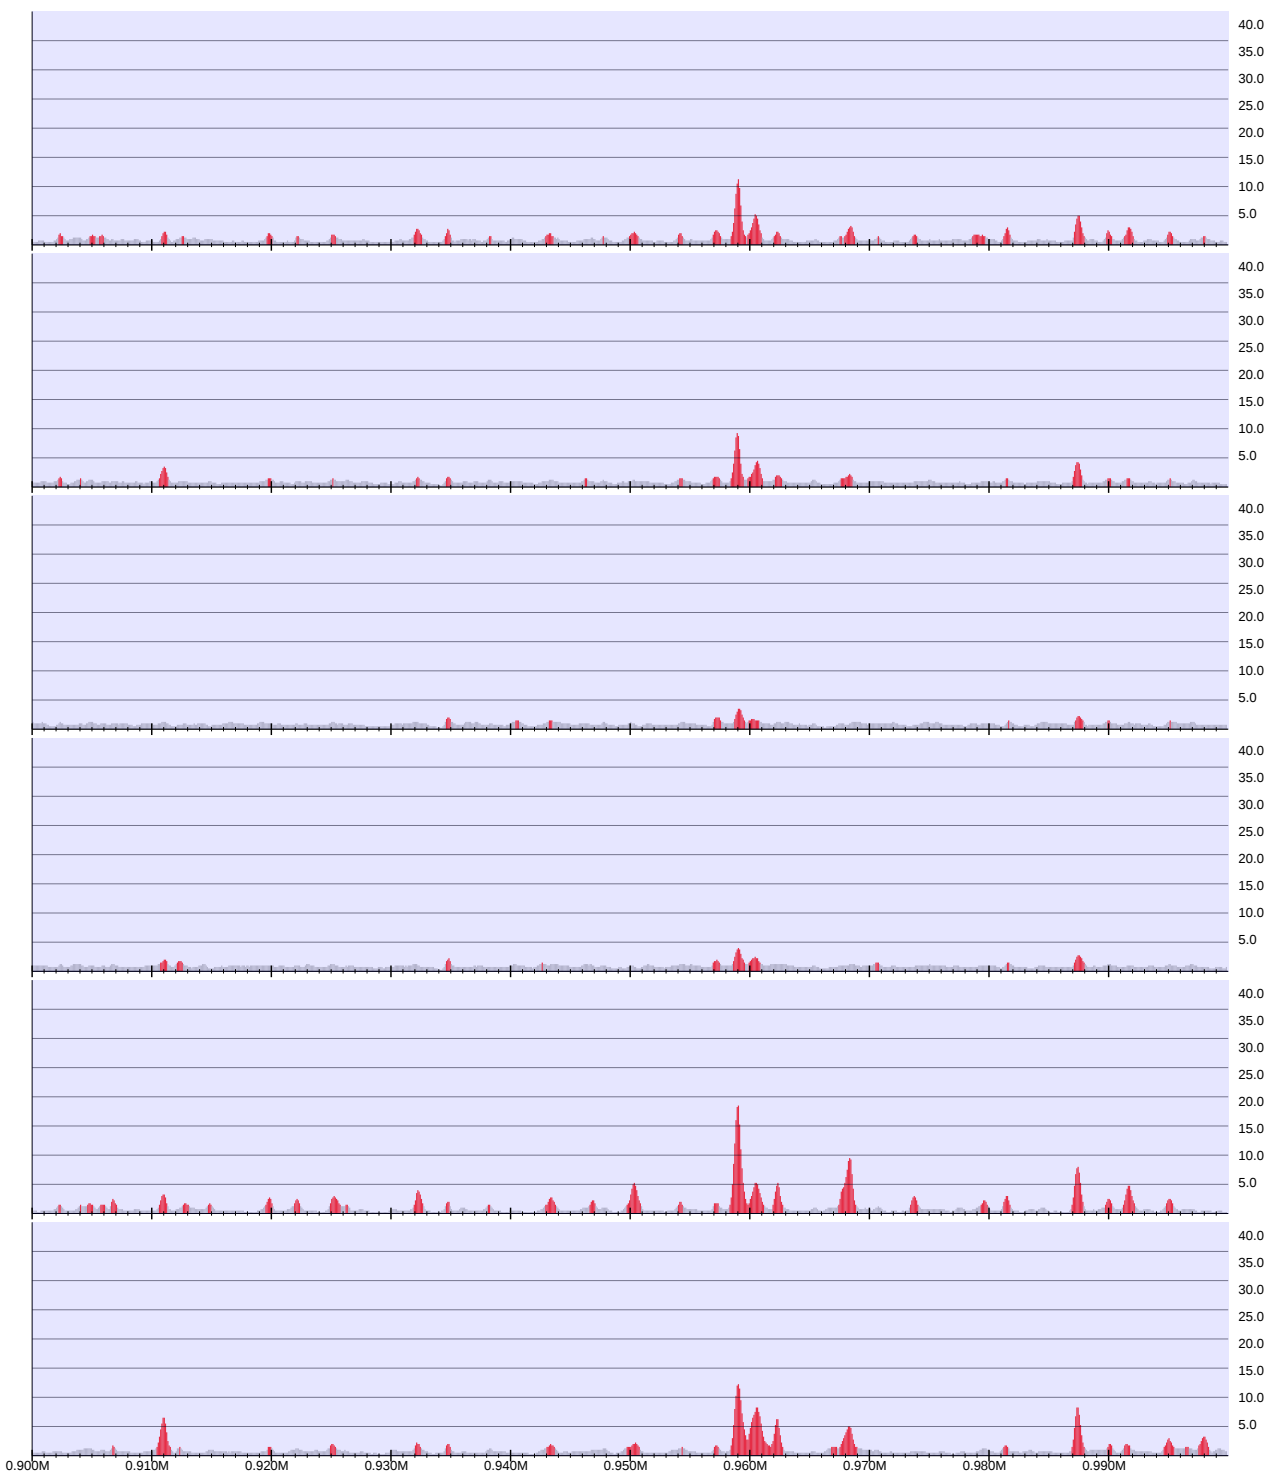

I\_1\_11

coding  
noncoding

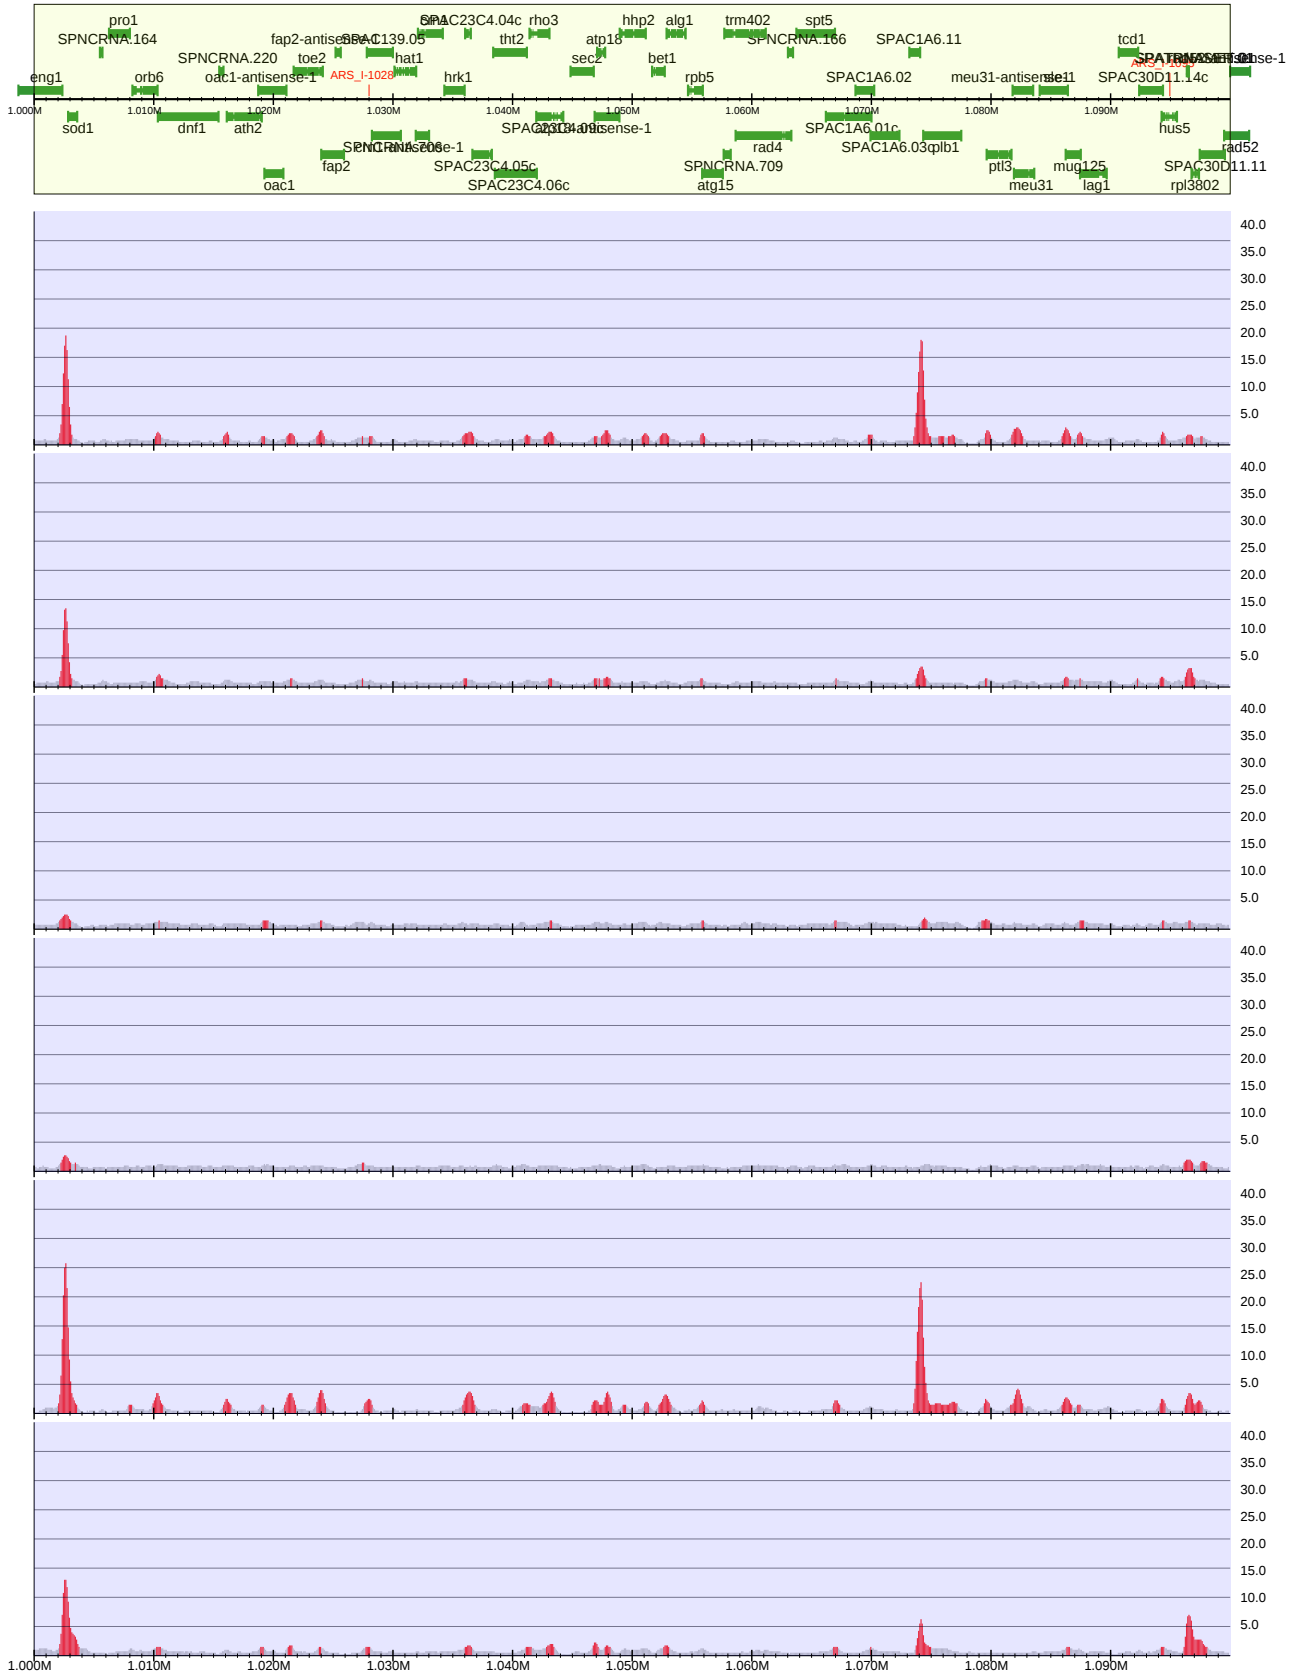

I\_1\_12

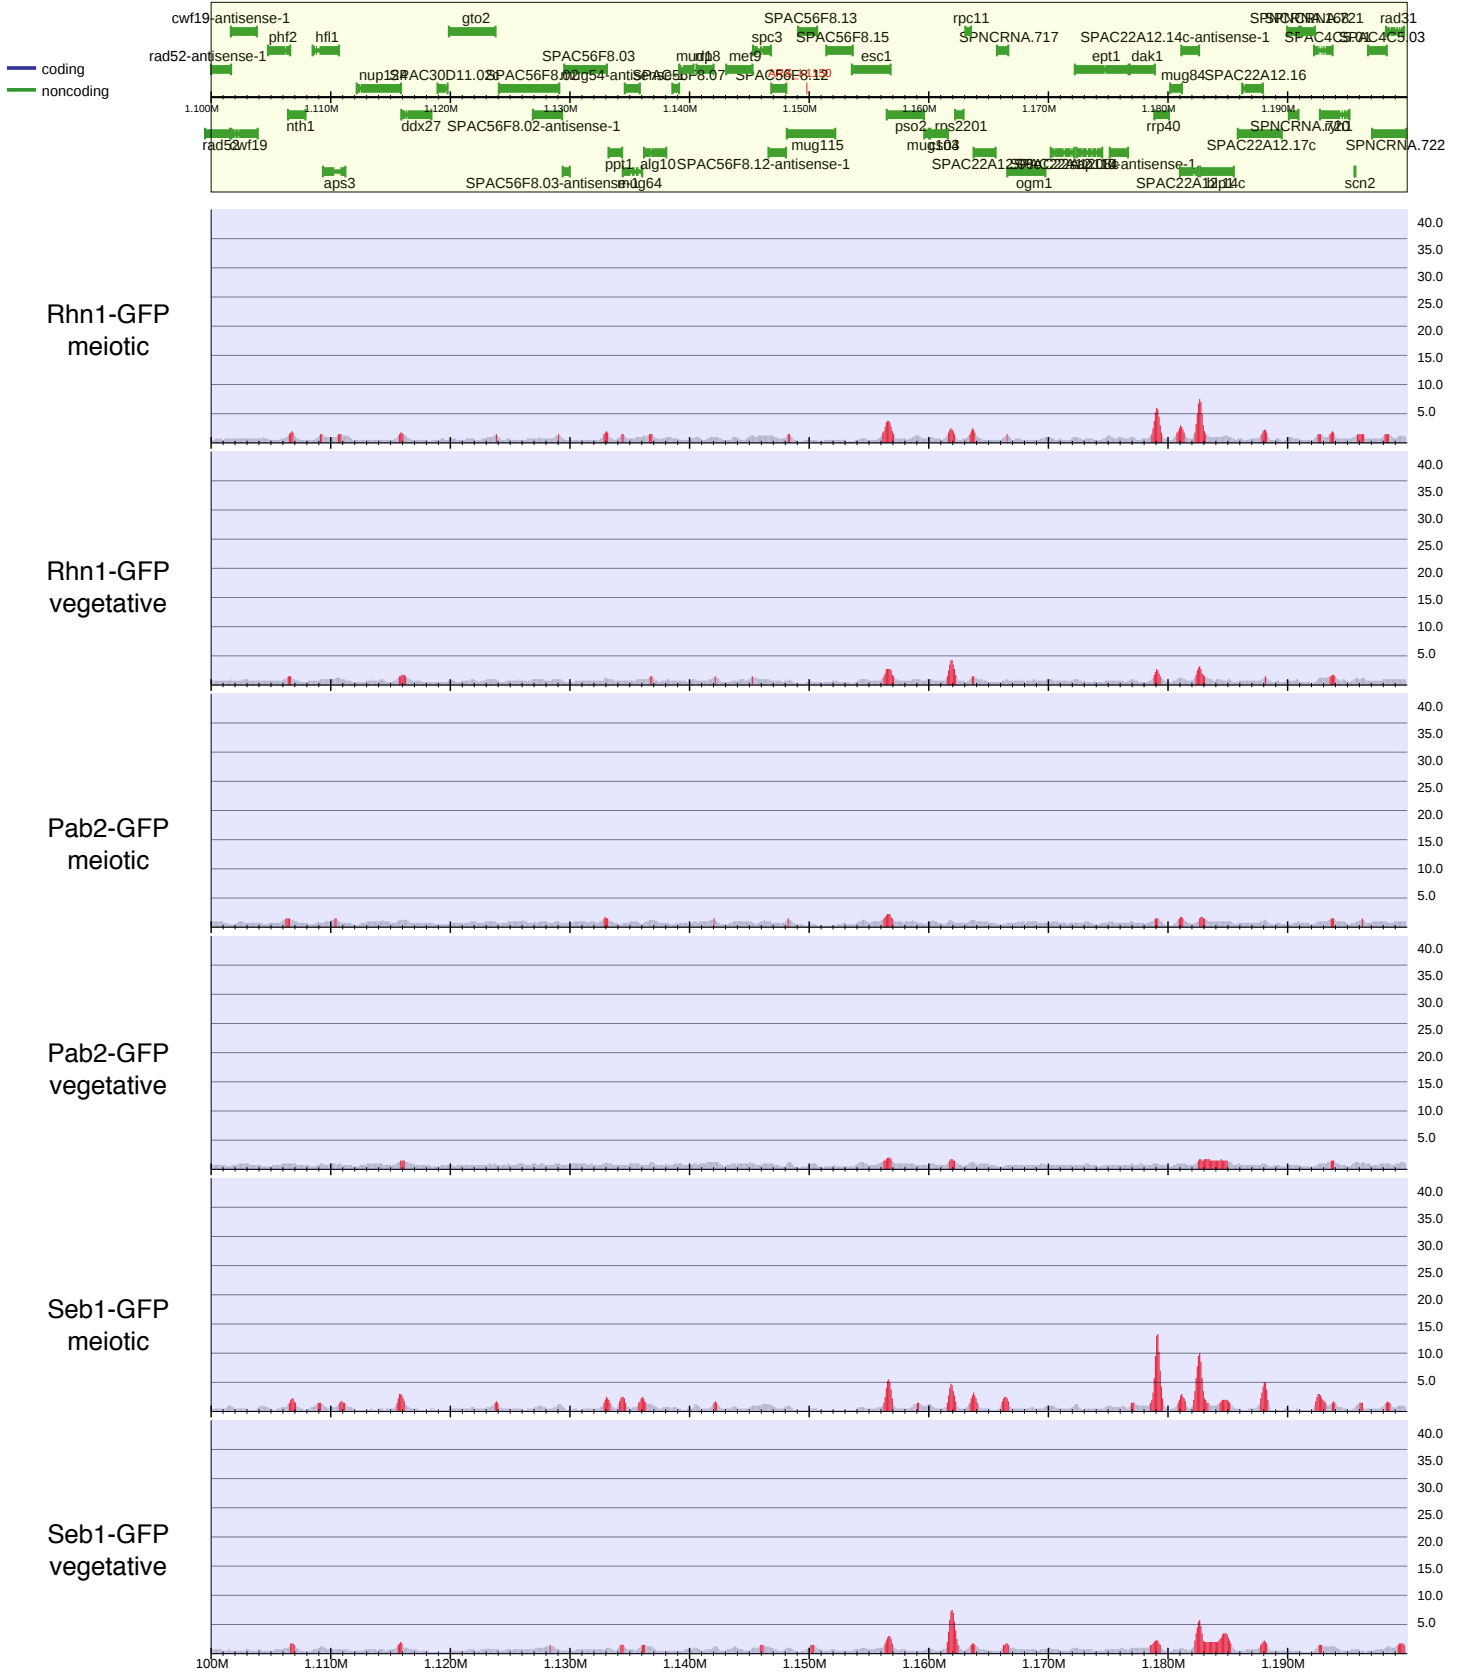



I\_1\_13

coding  
noncoding

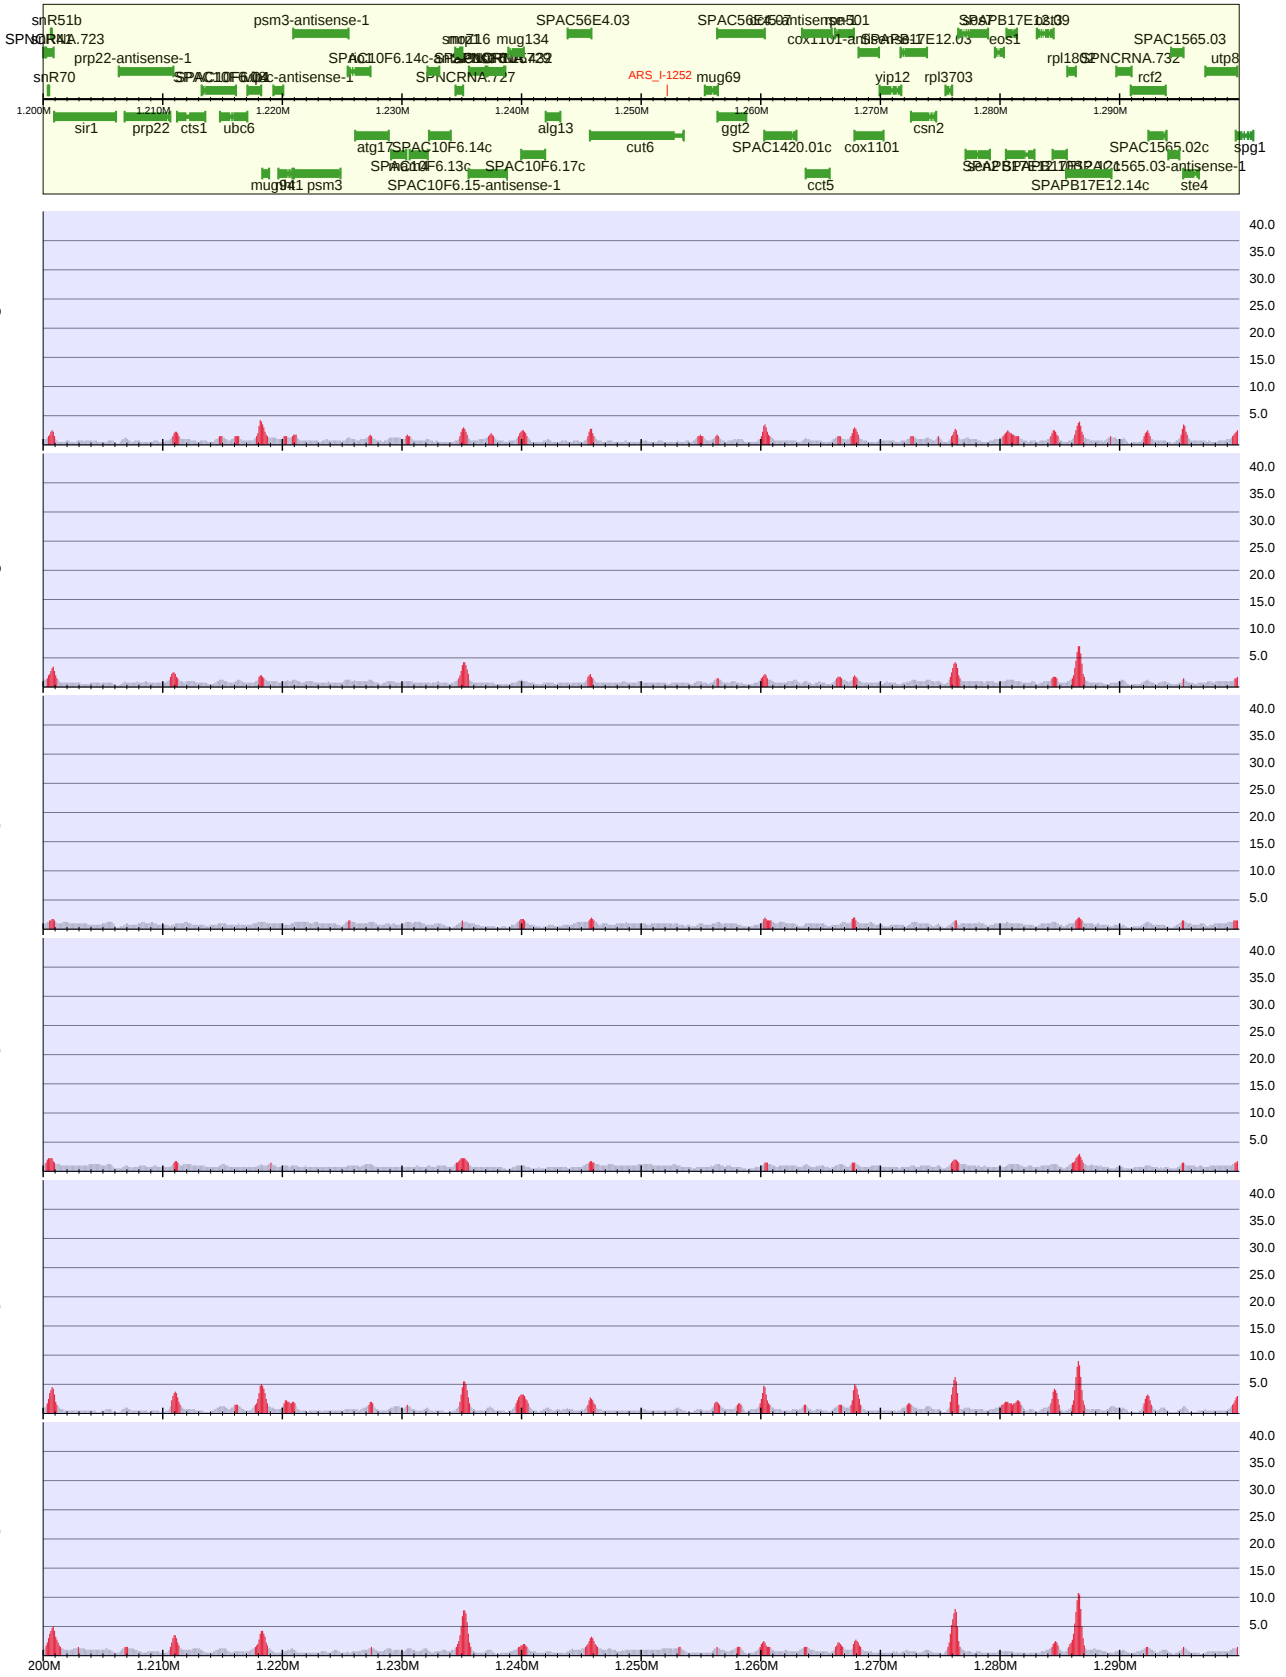

I\_1\_14

coding  
noncoding

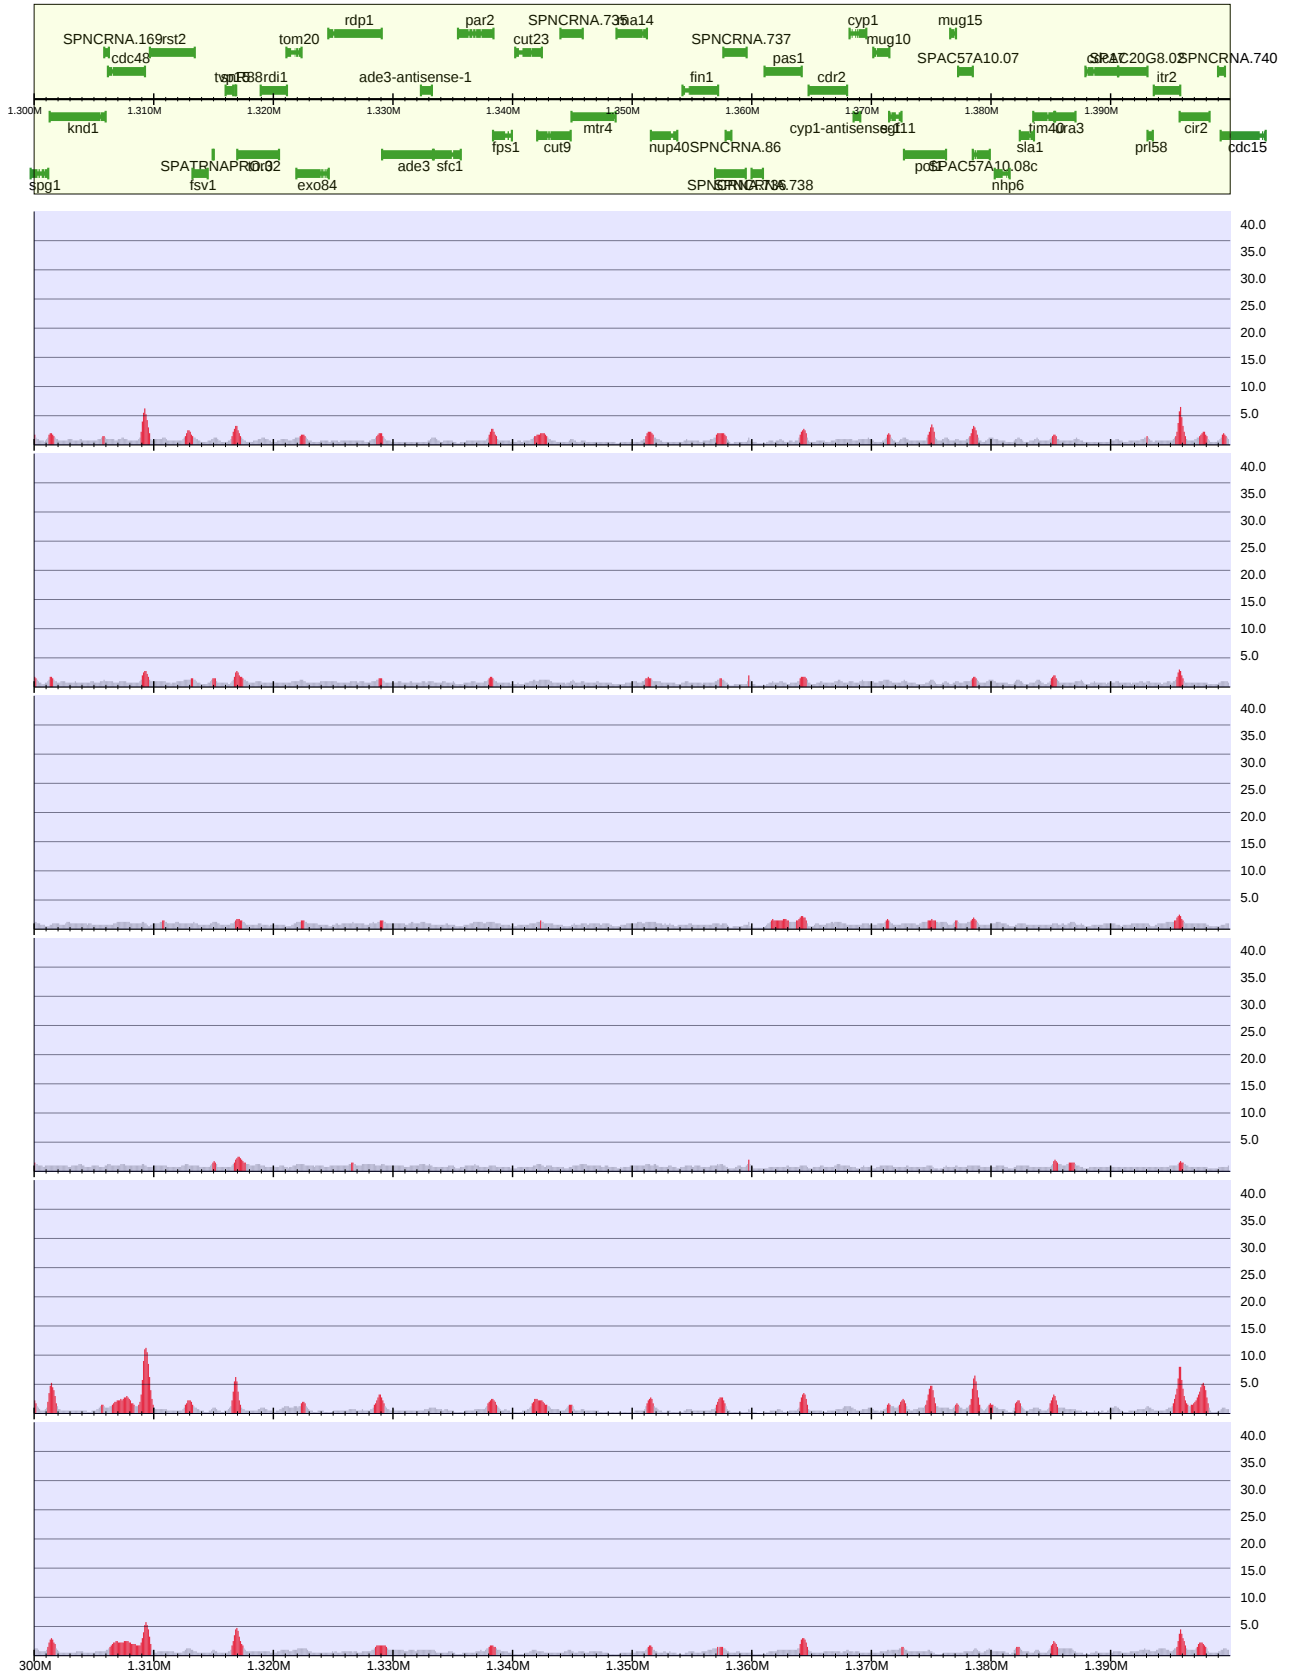

I\_1\_15

coding  
noncoding

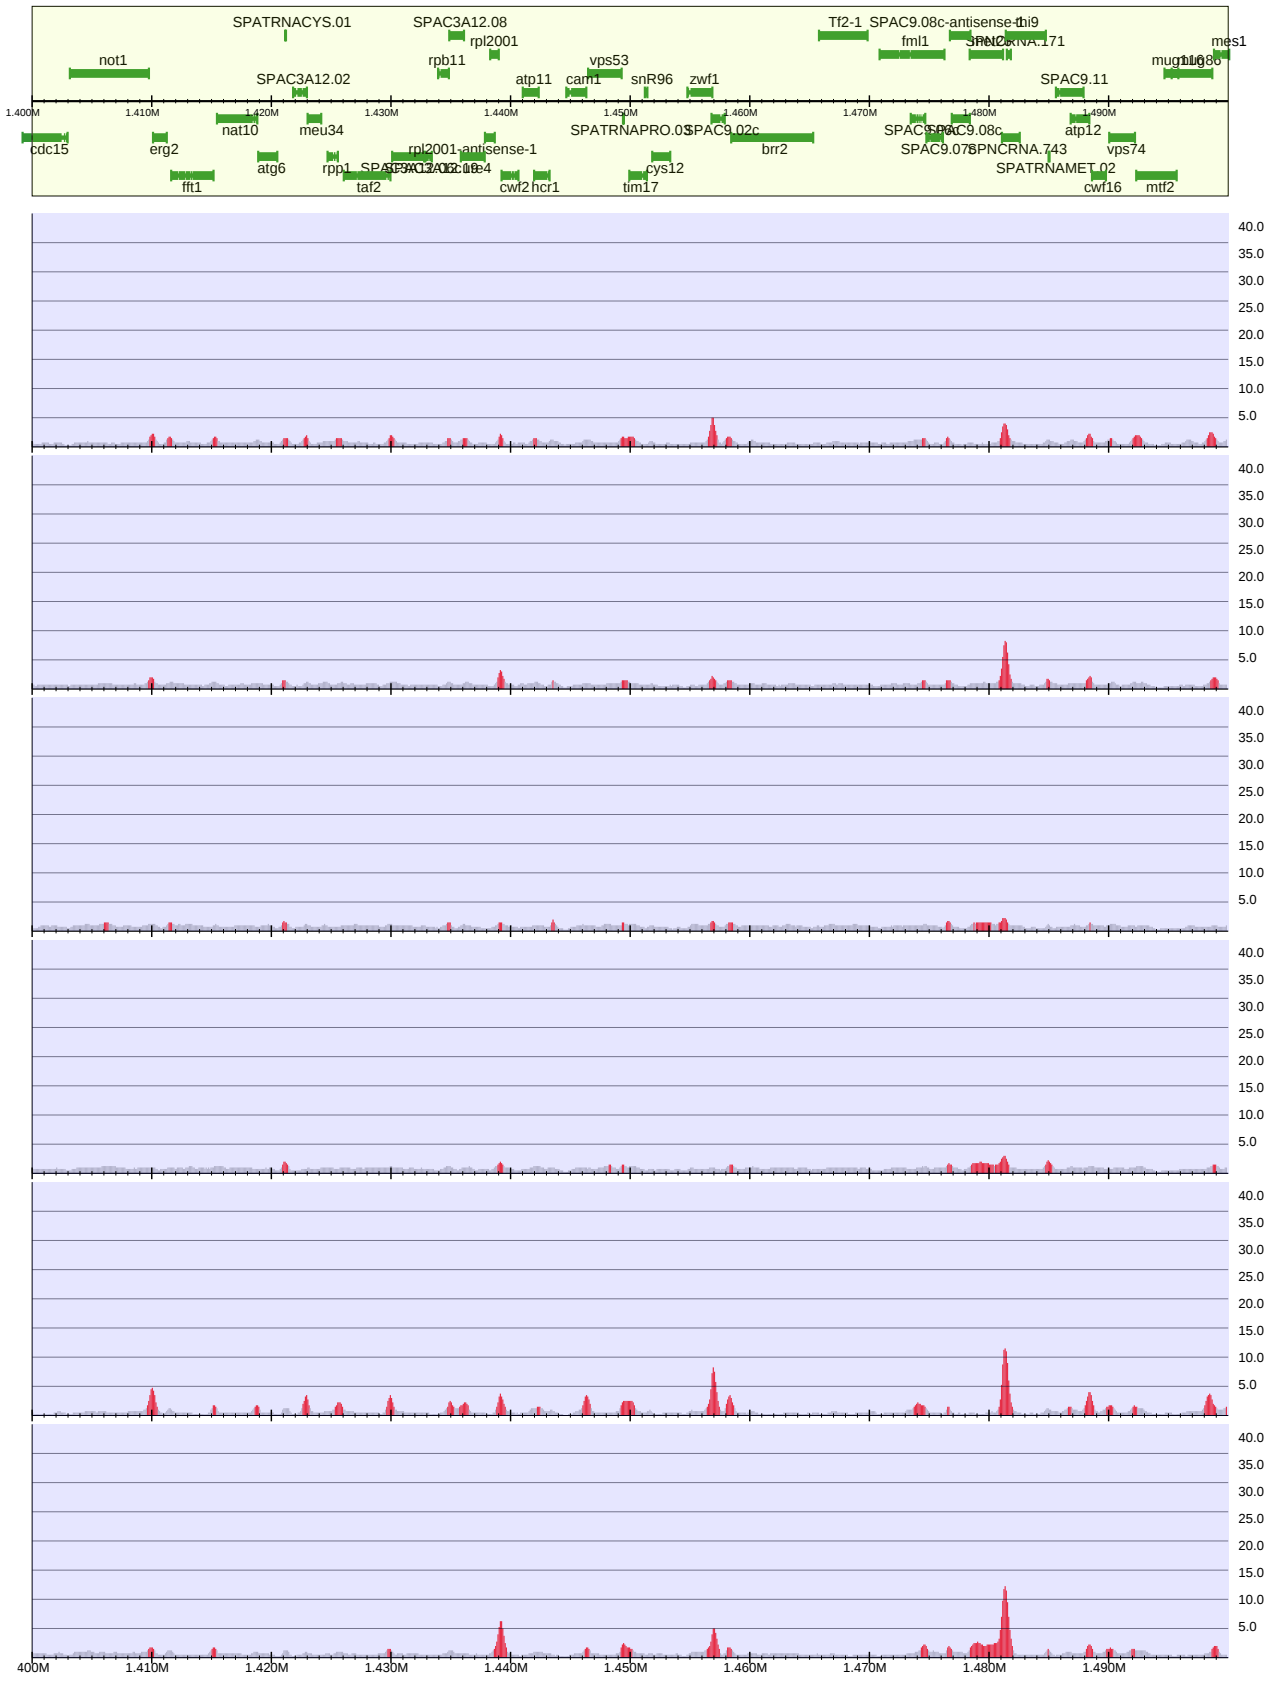

I\_1\_16

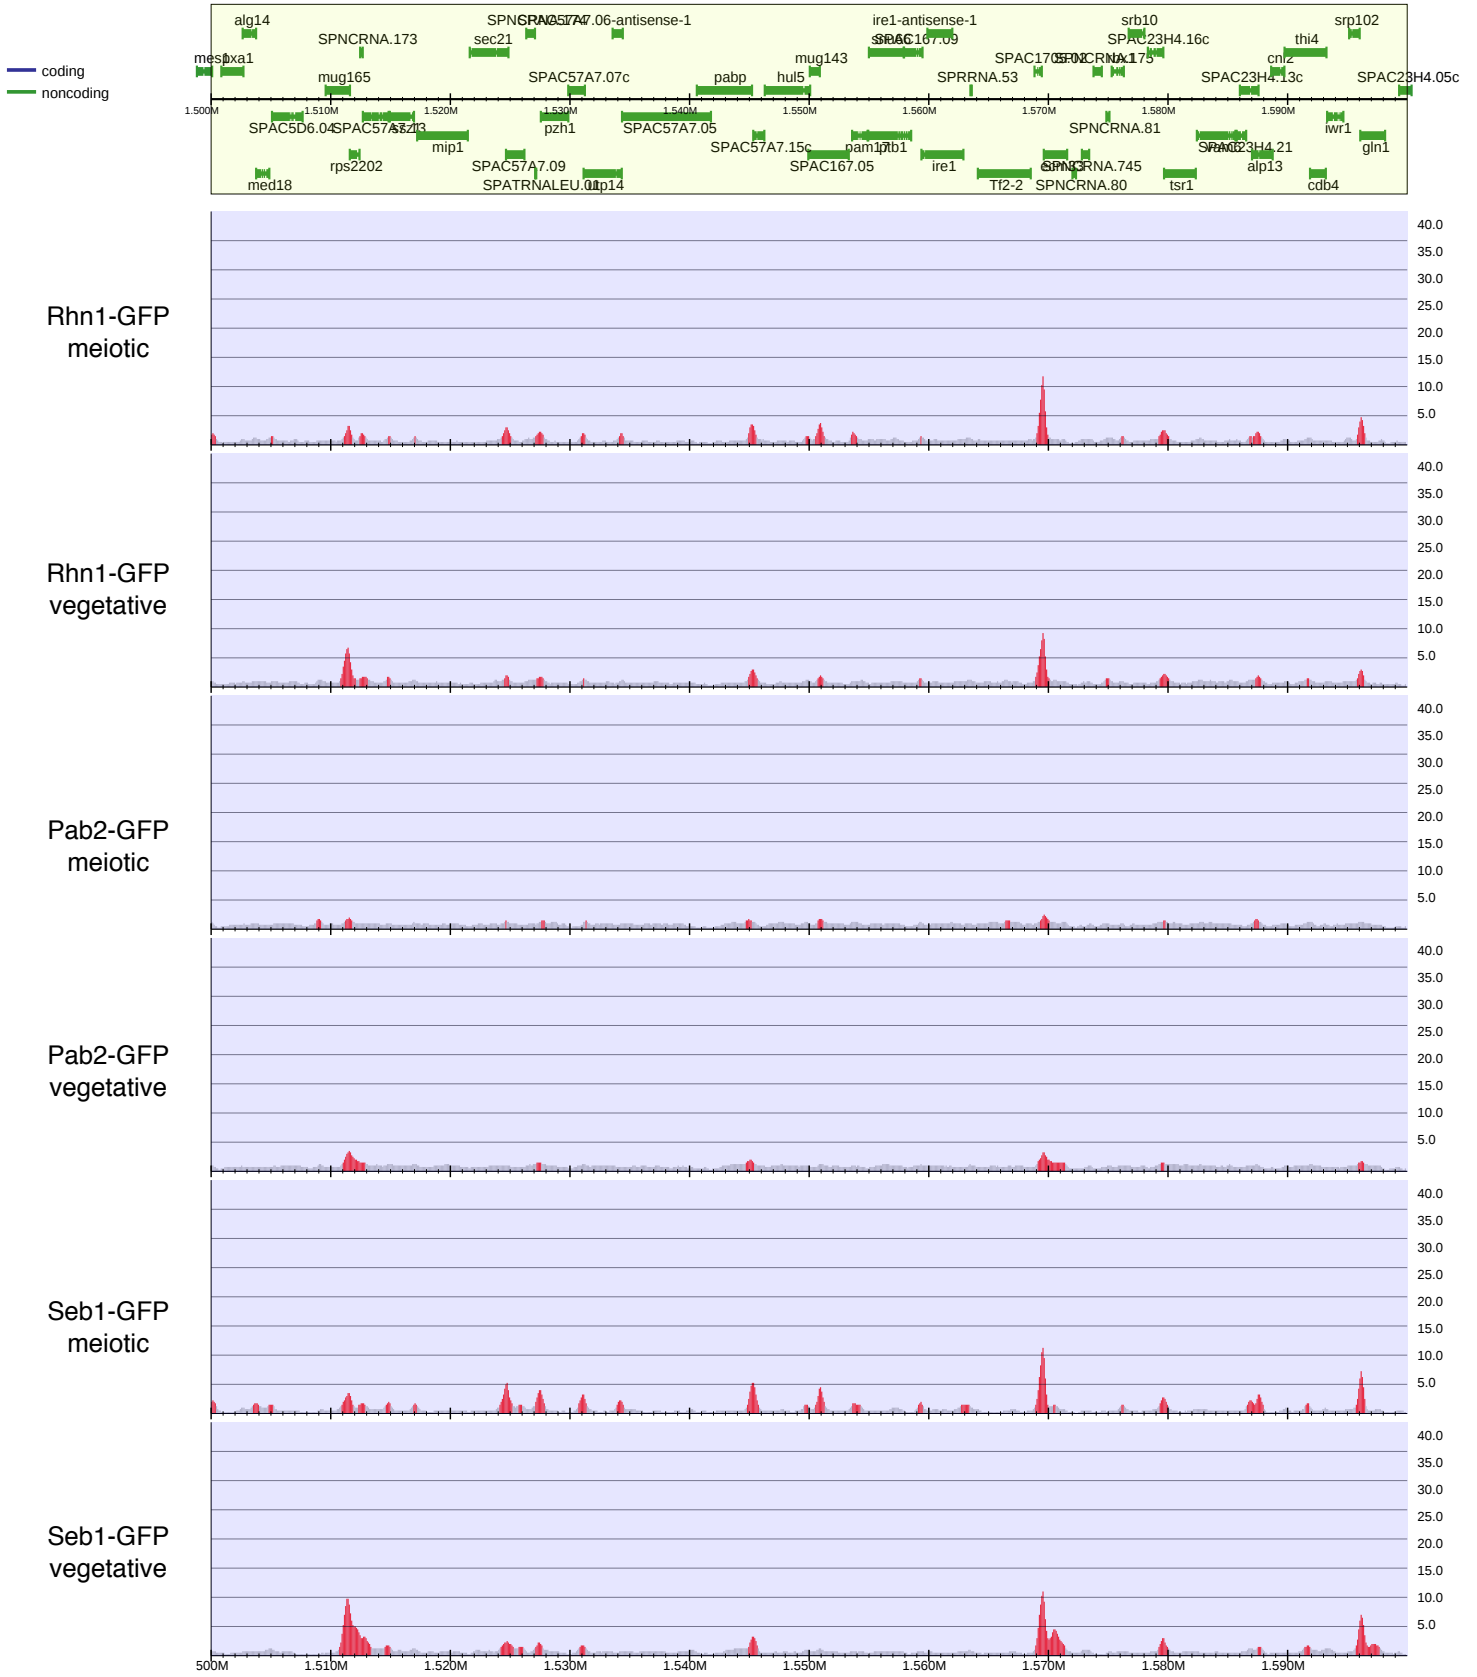

I\_1\_17

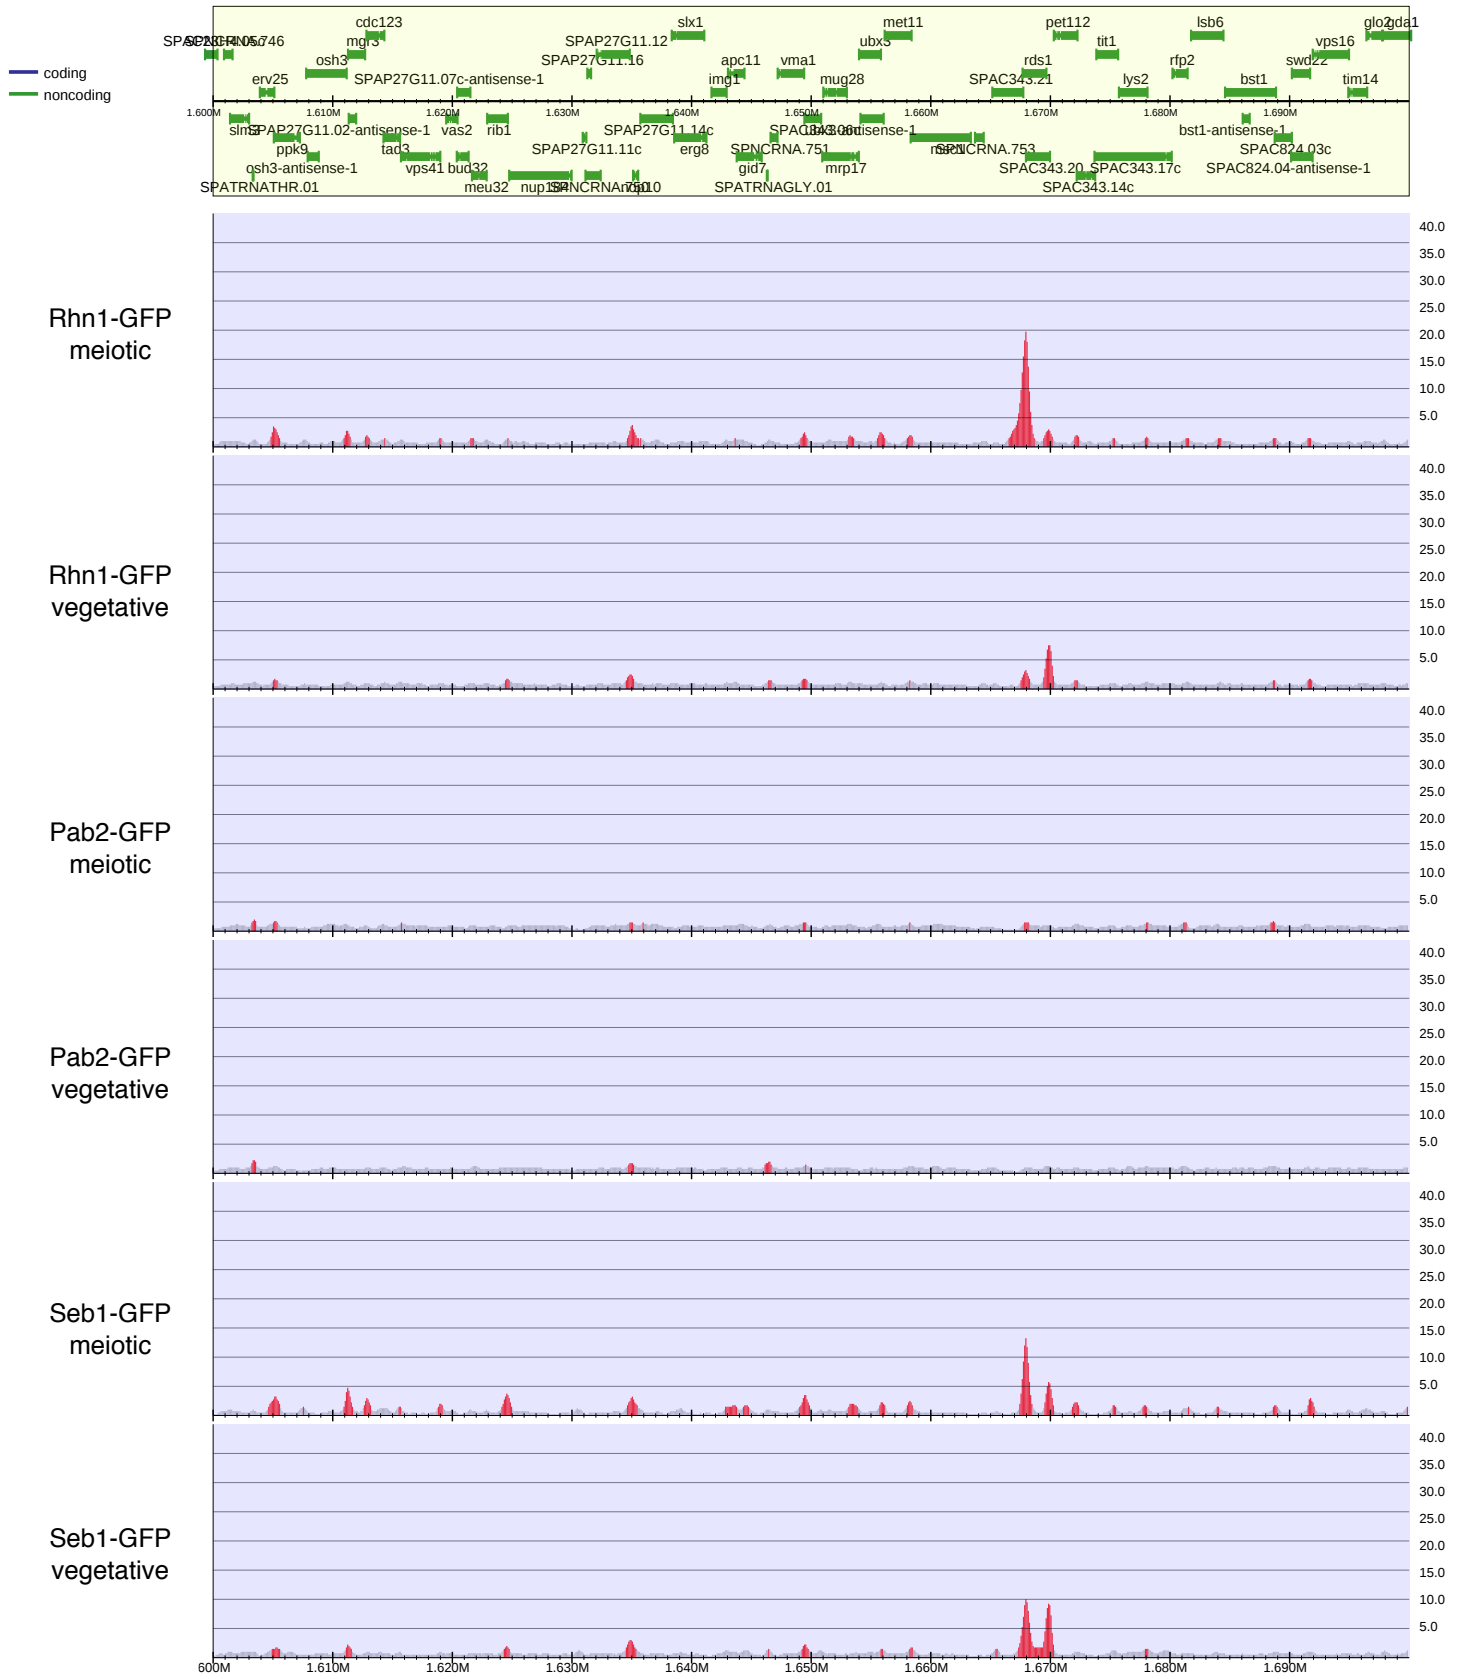

I\_1\_18

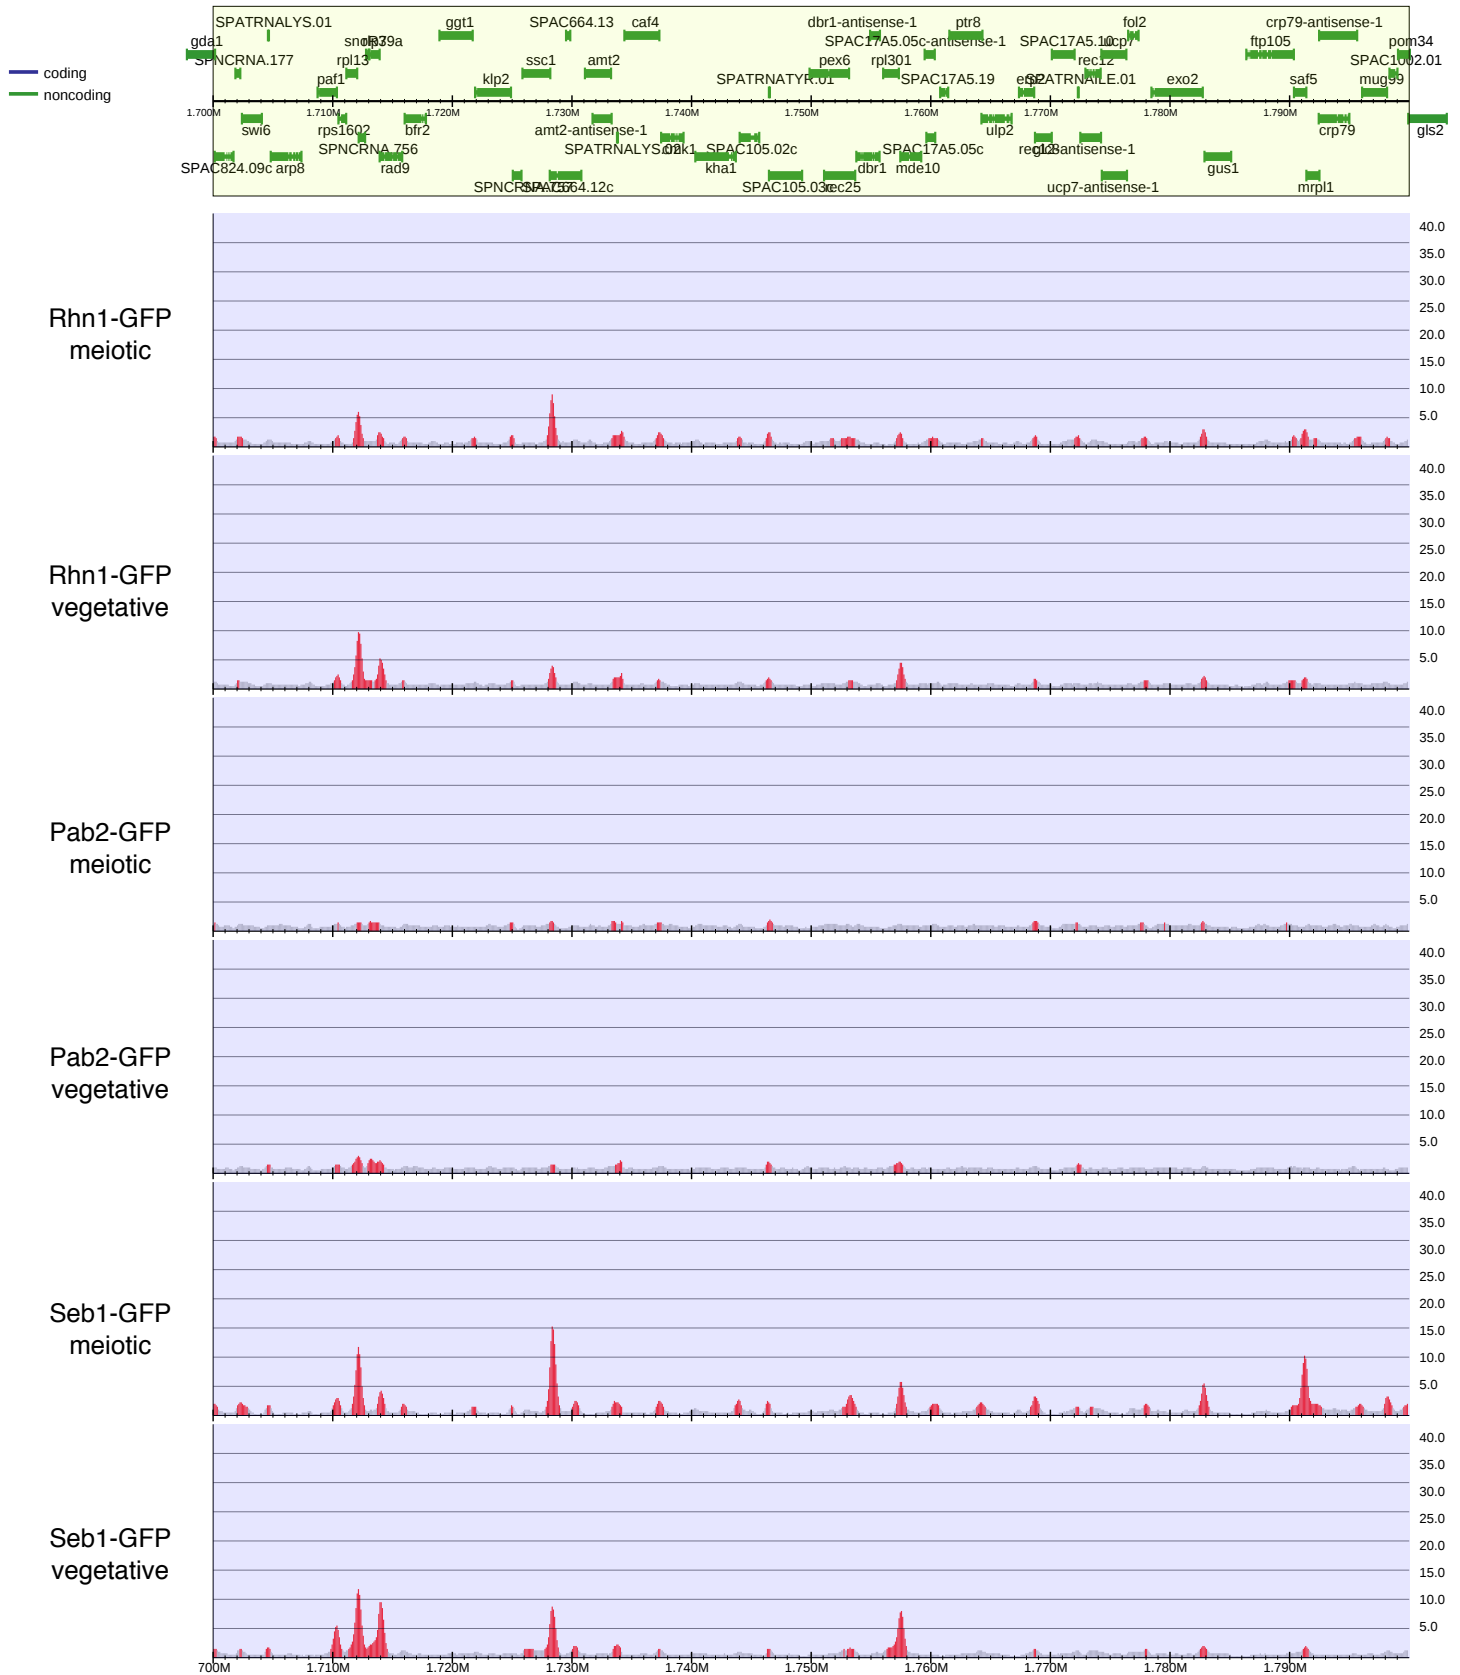

I\_1\_19

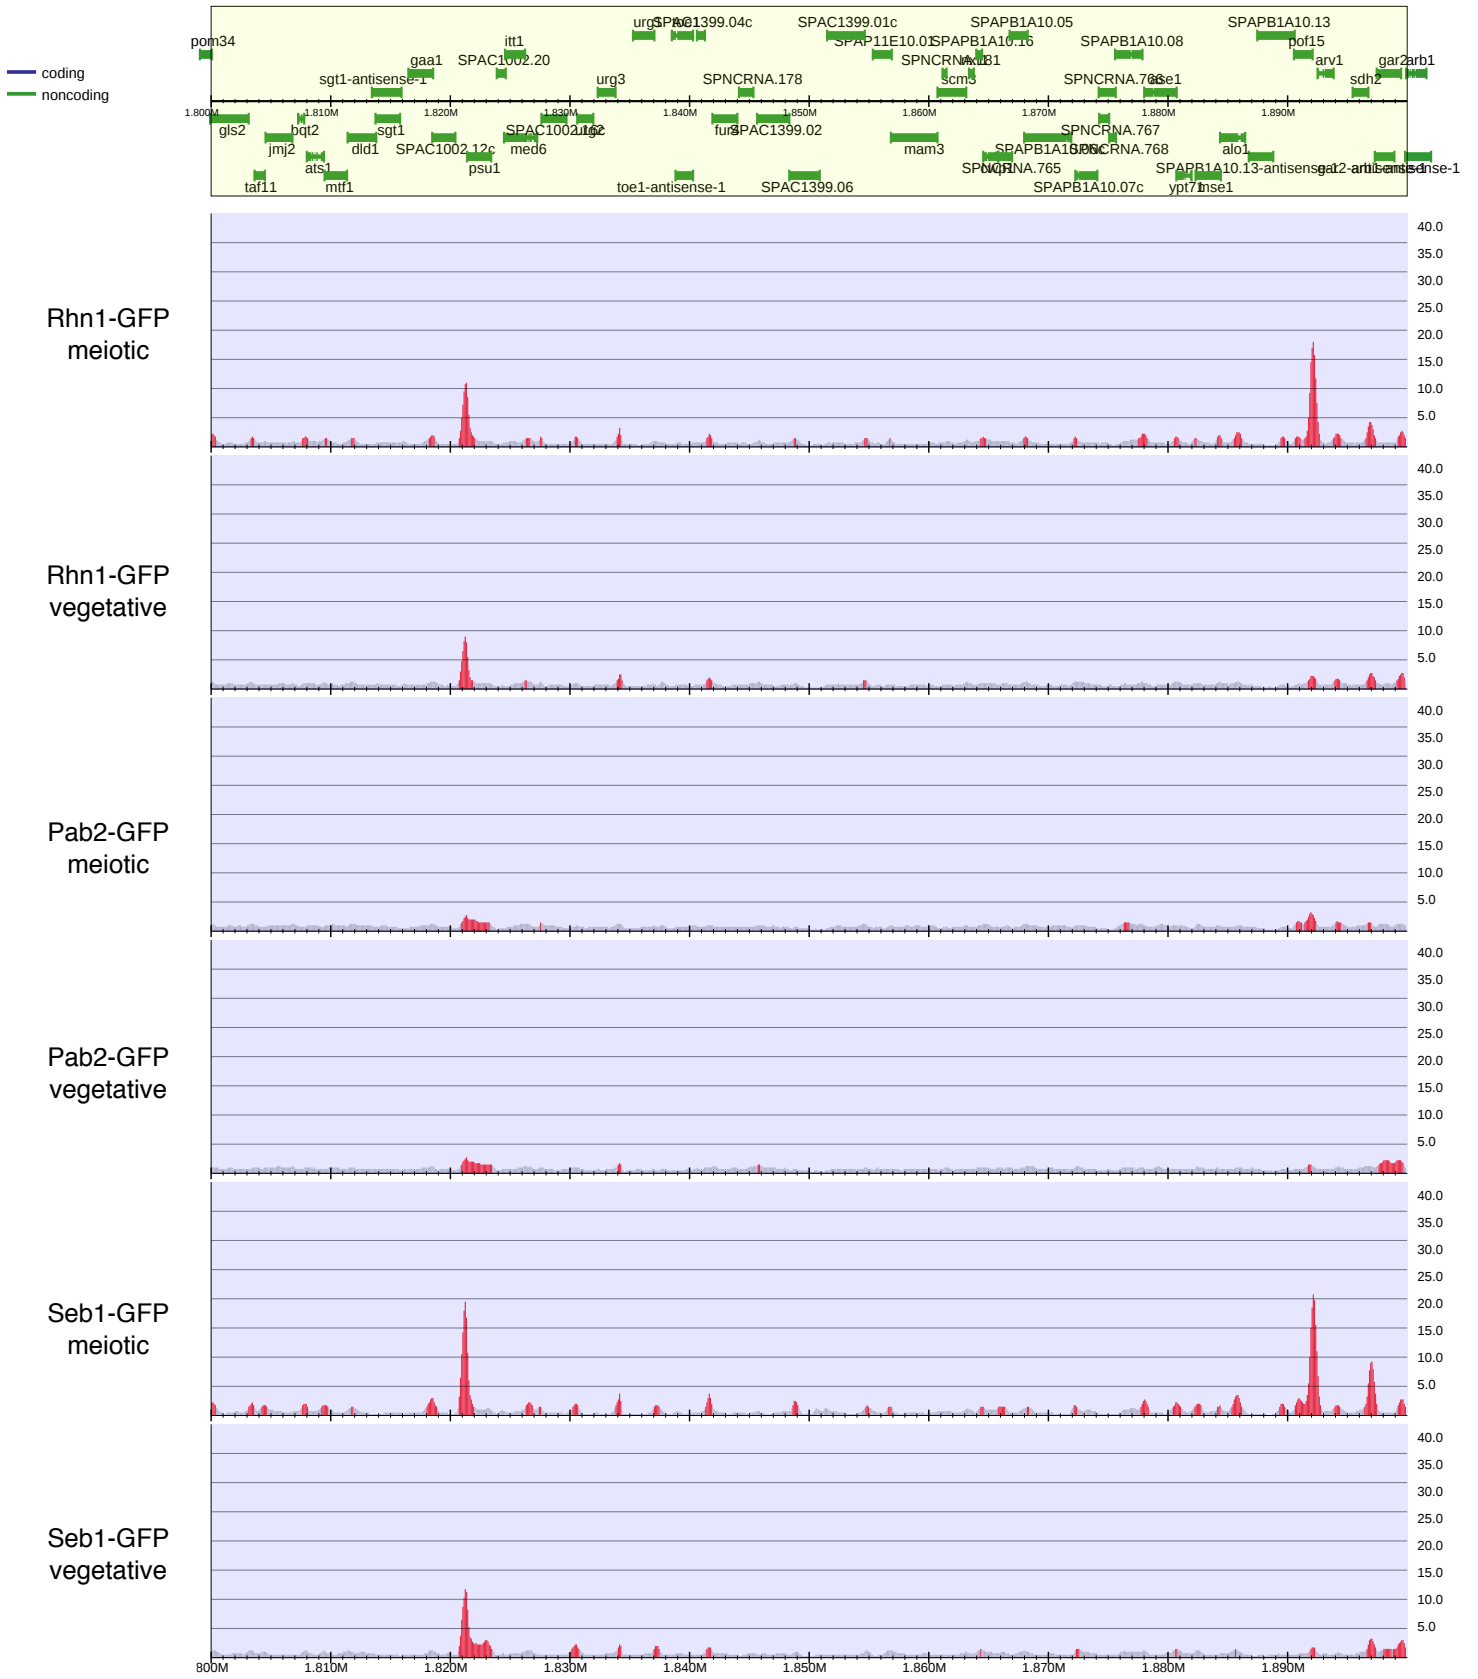

I\_1\_20

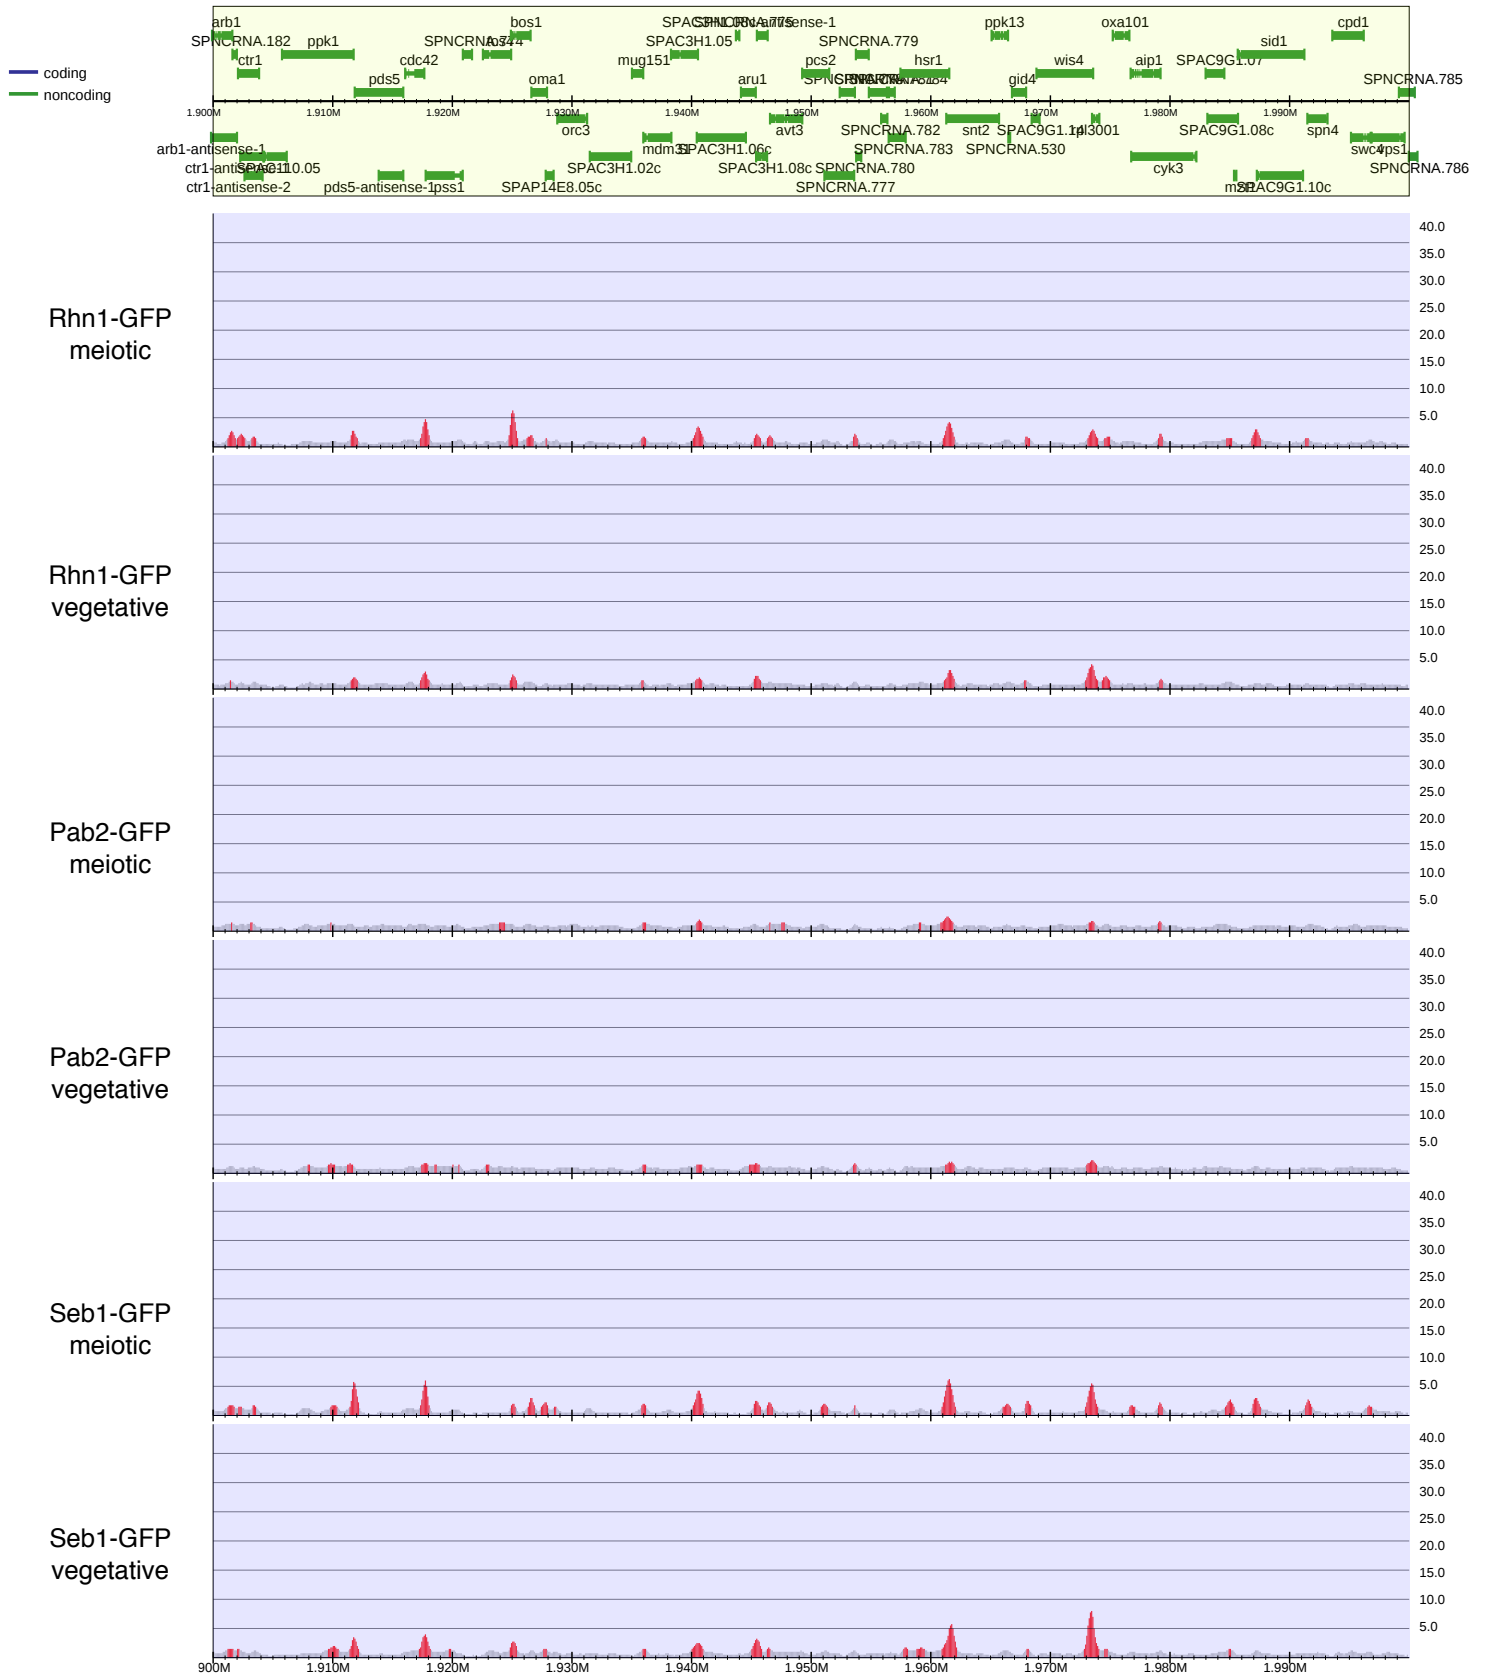



I\_1\_21

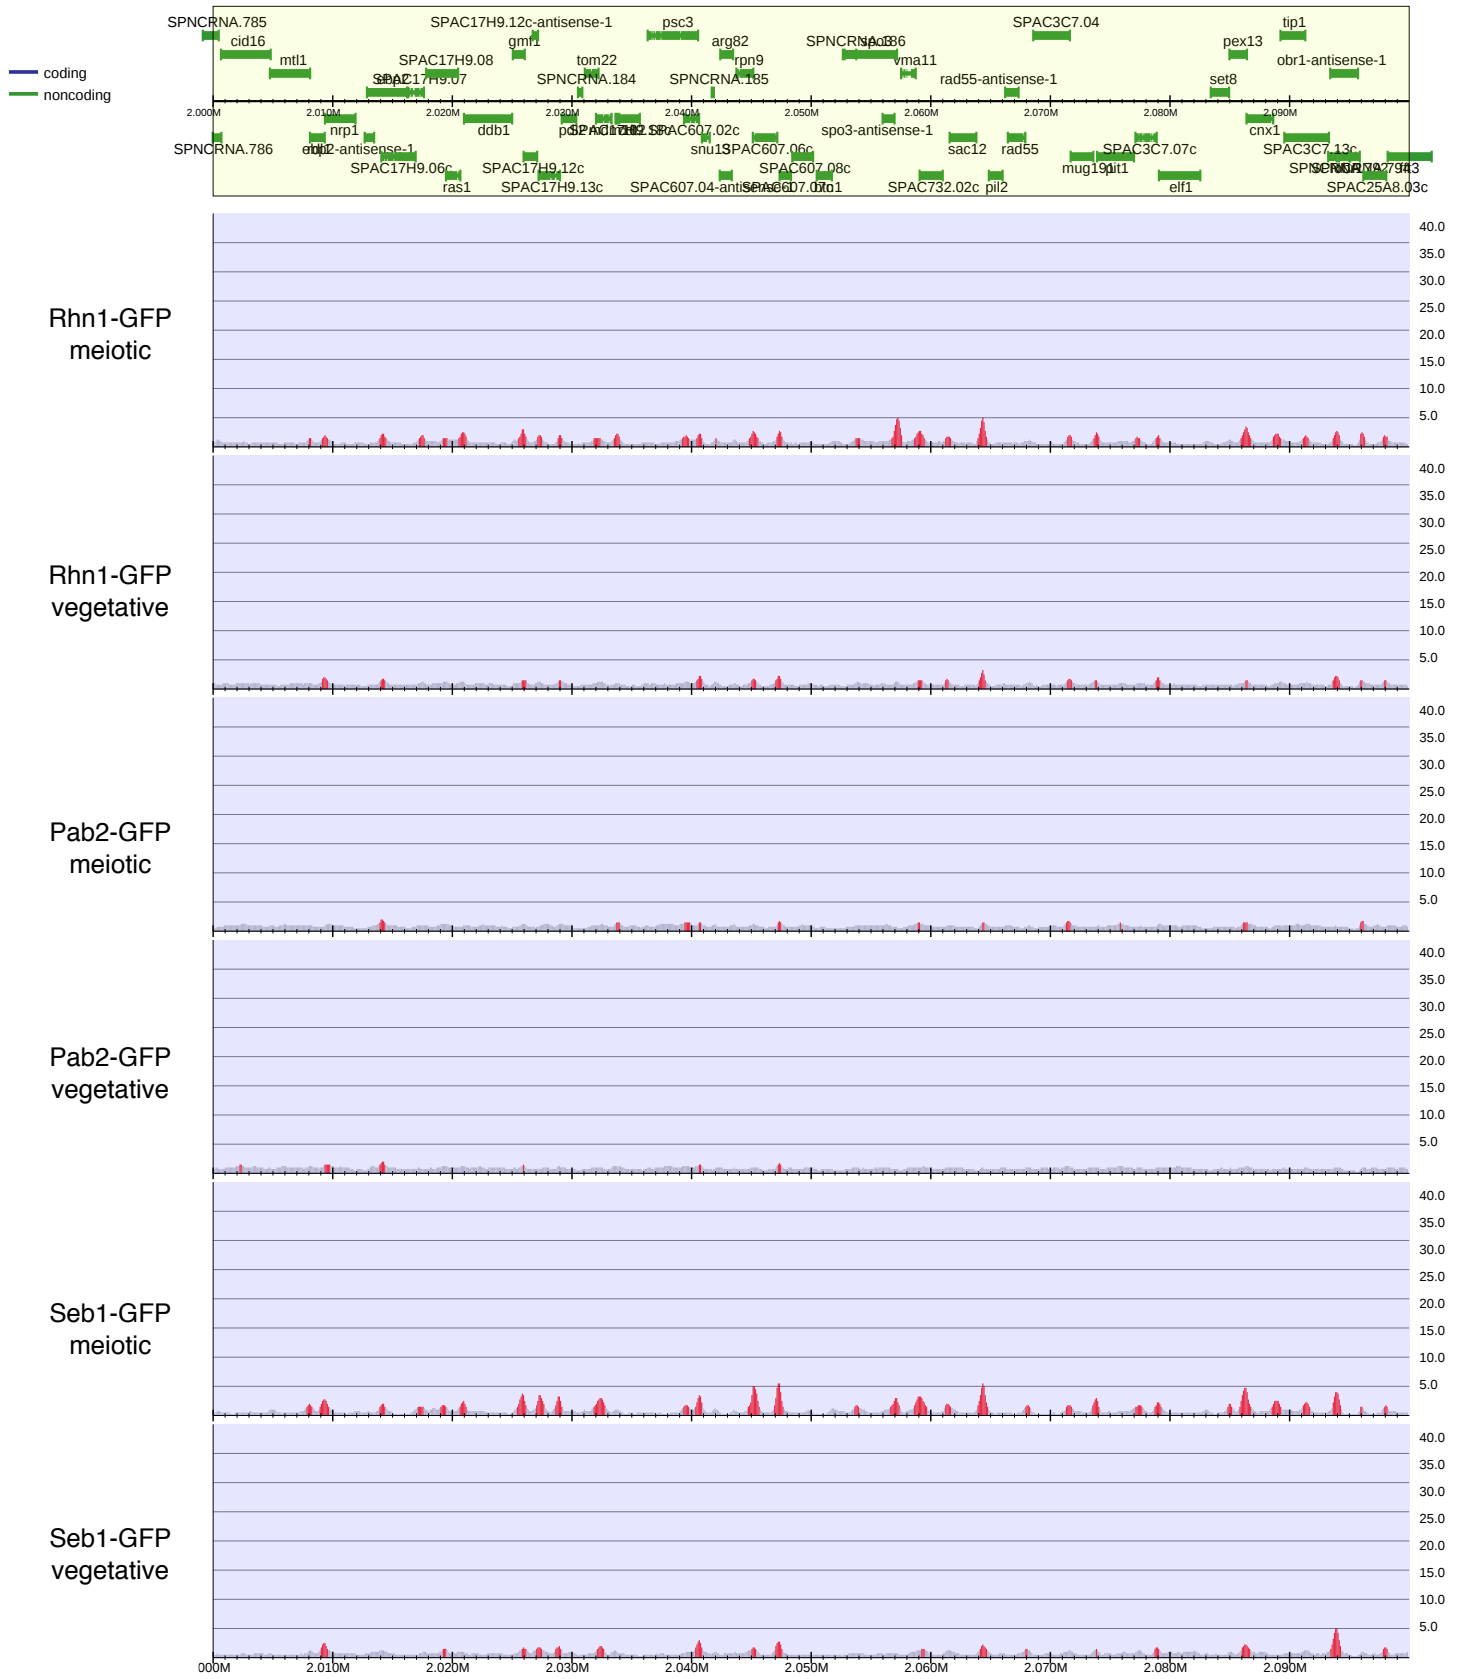

I\_1\_22

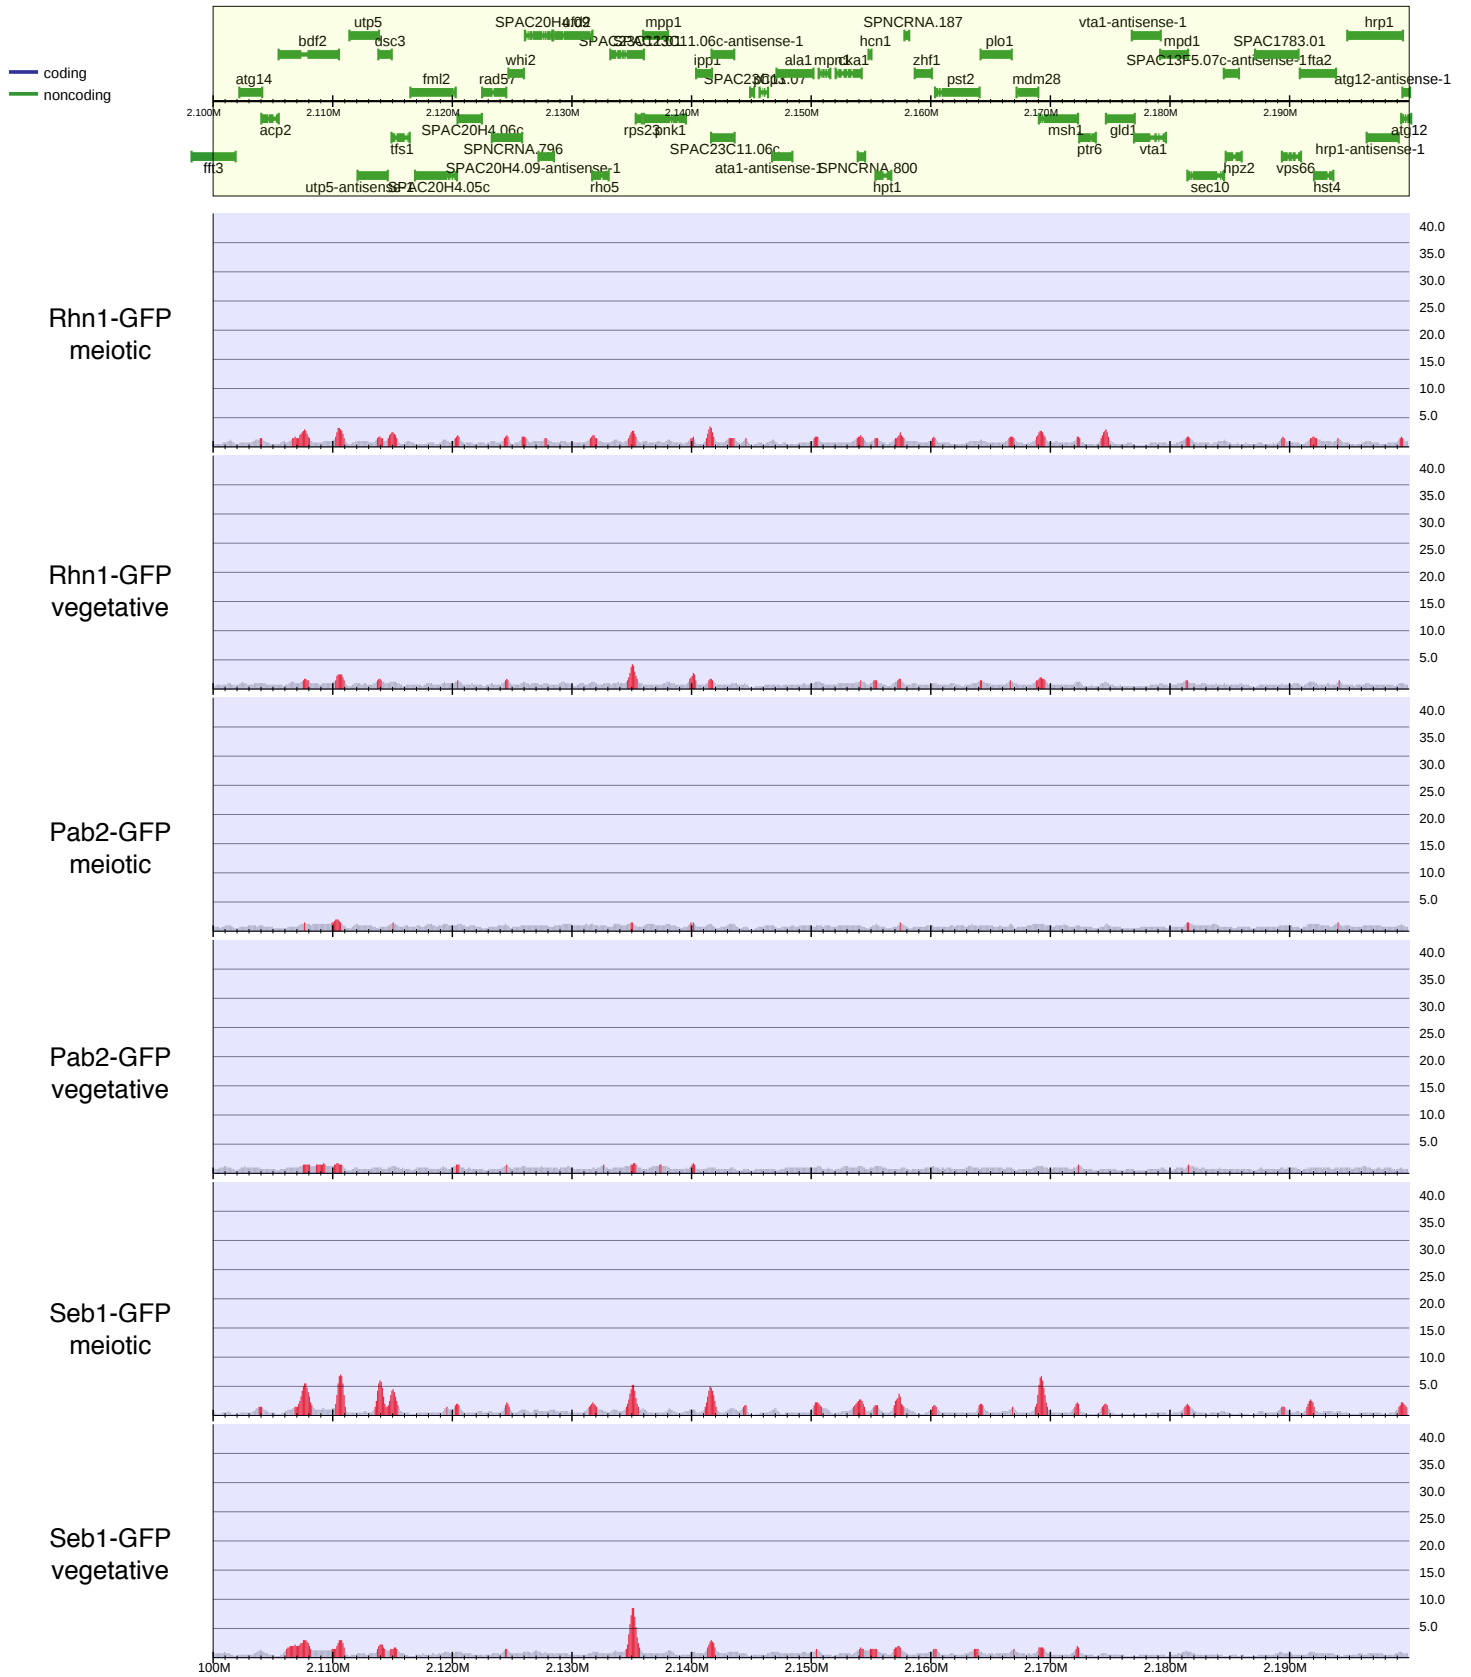

I\_1\_23

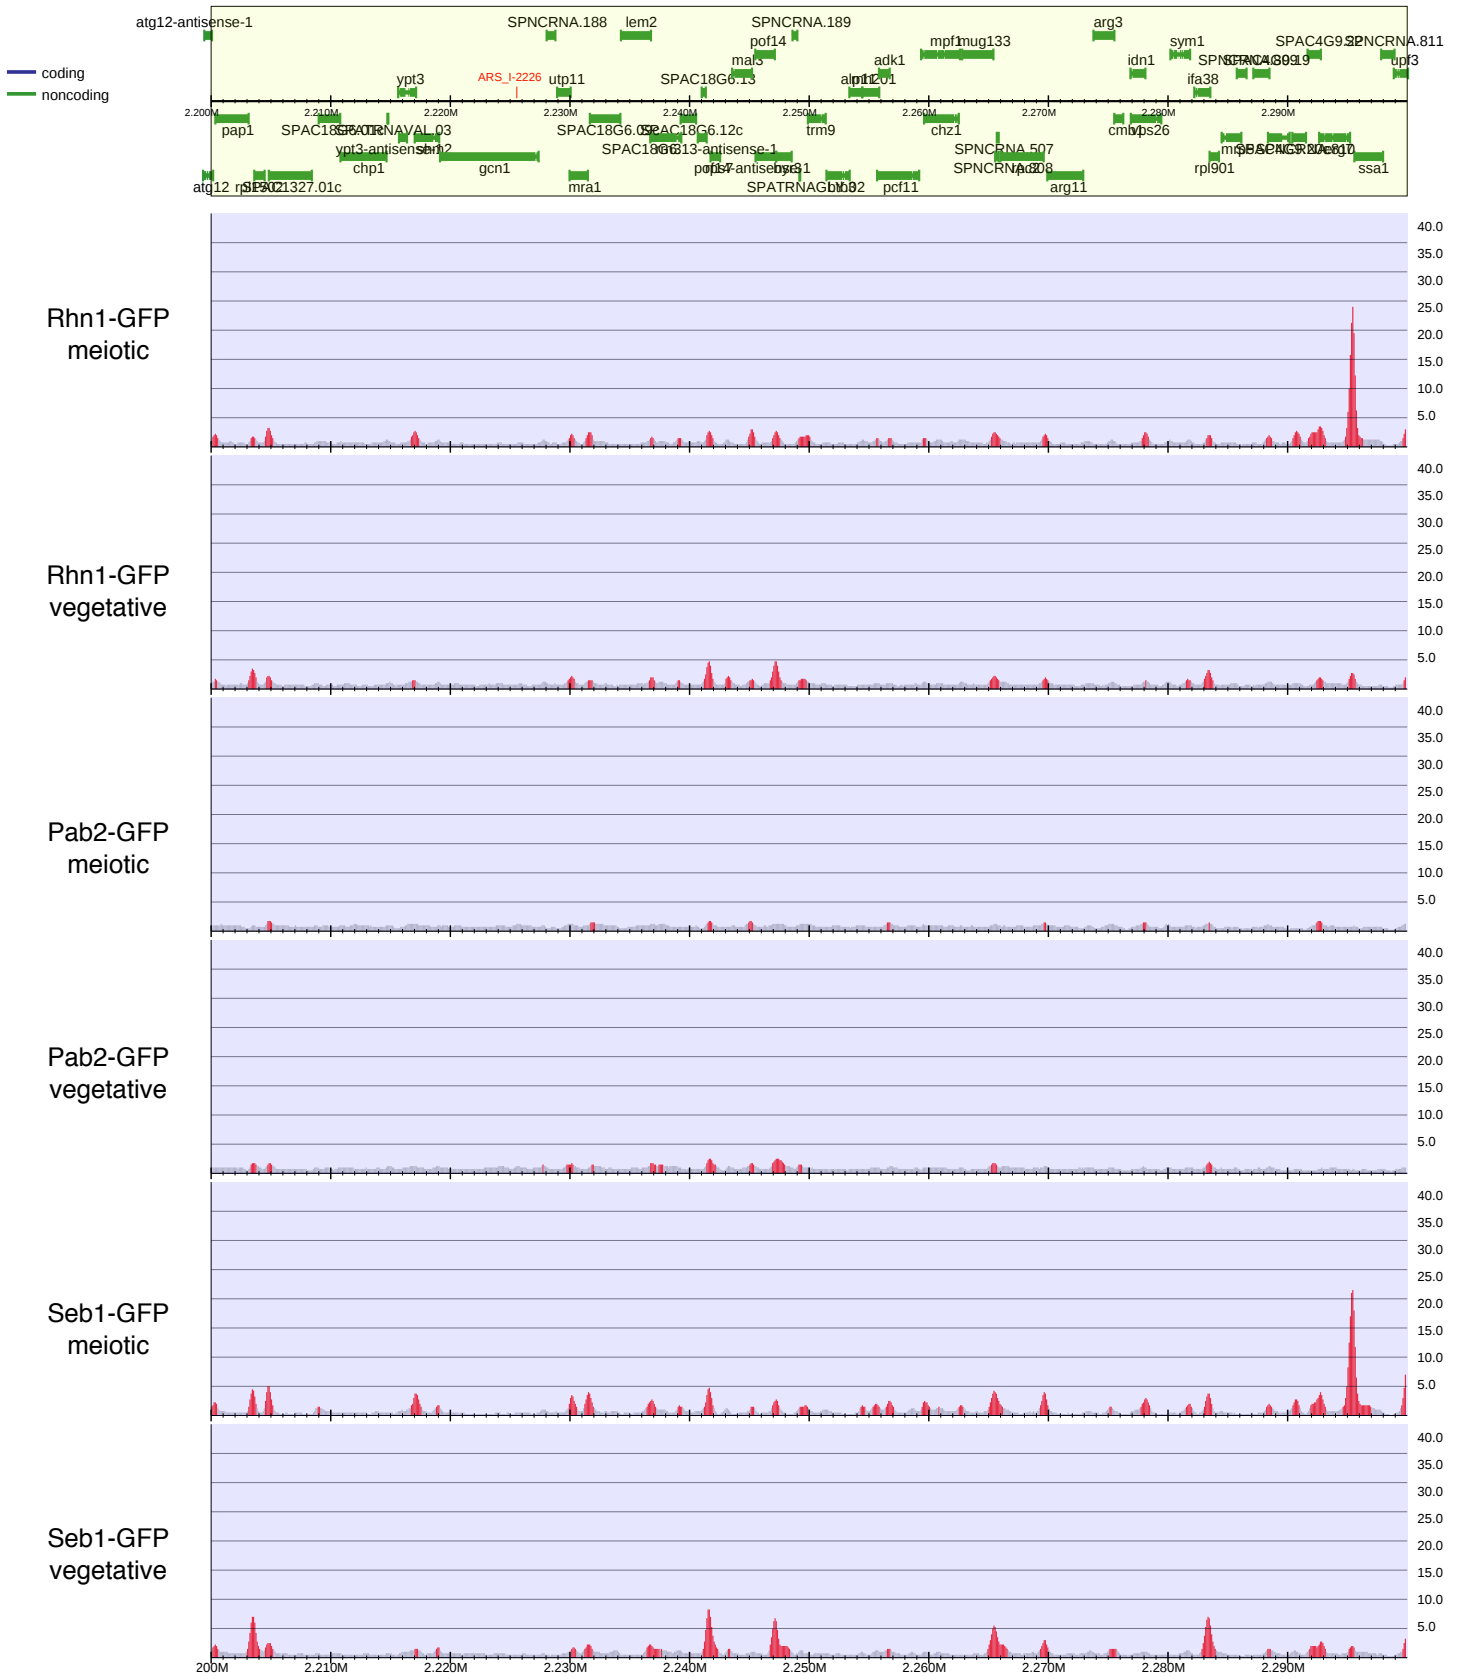

I\_1\_24

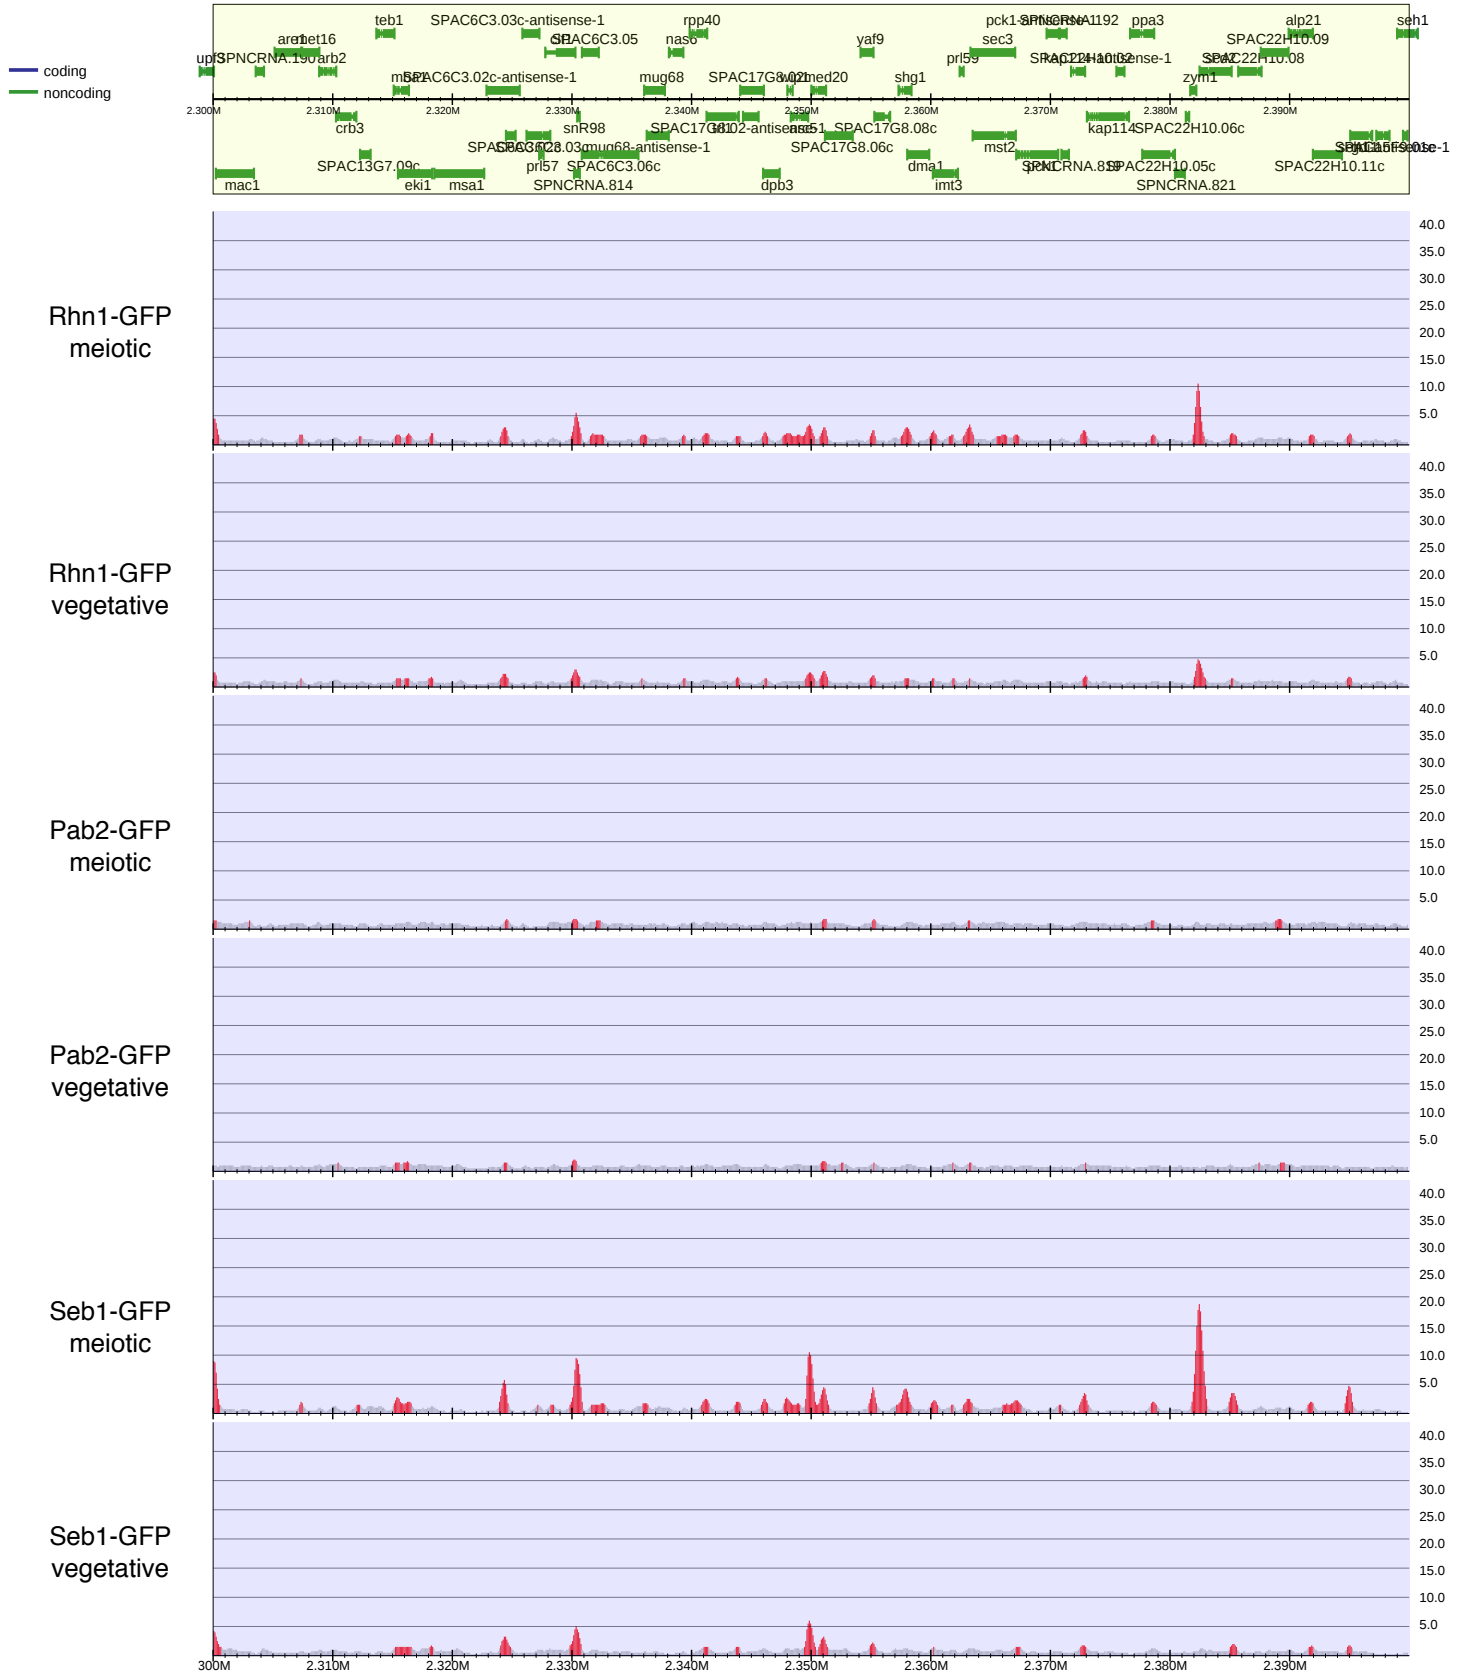



I\_1\_26

— coding  
— noncoding

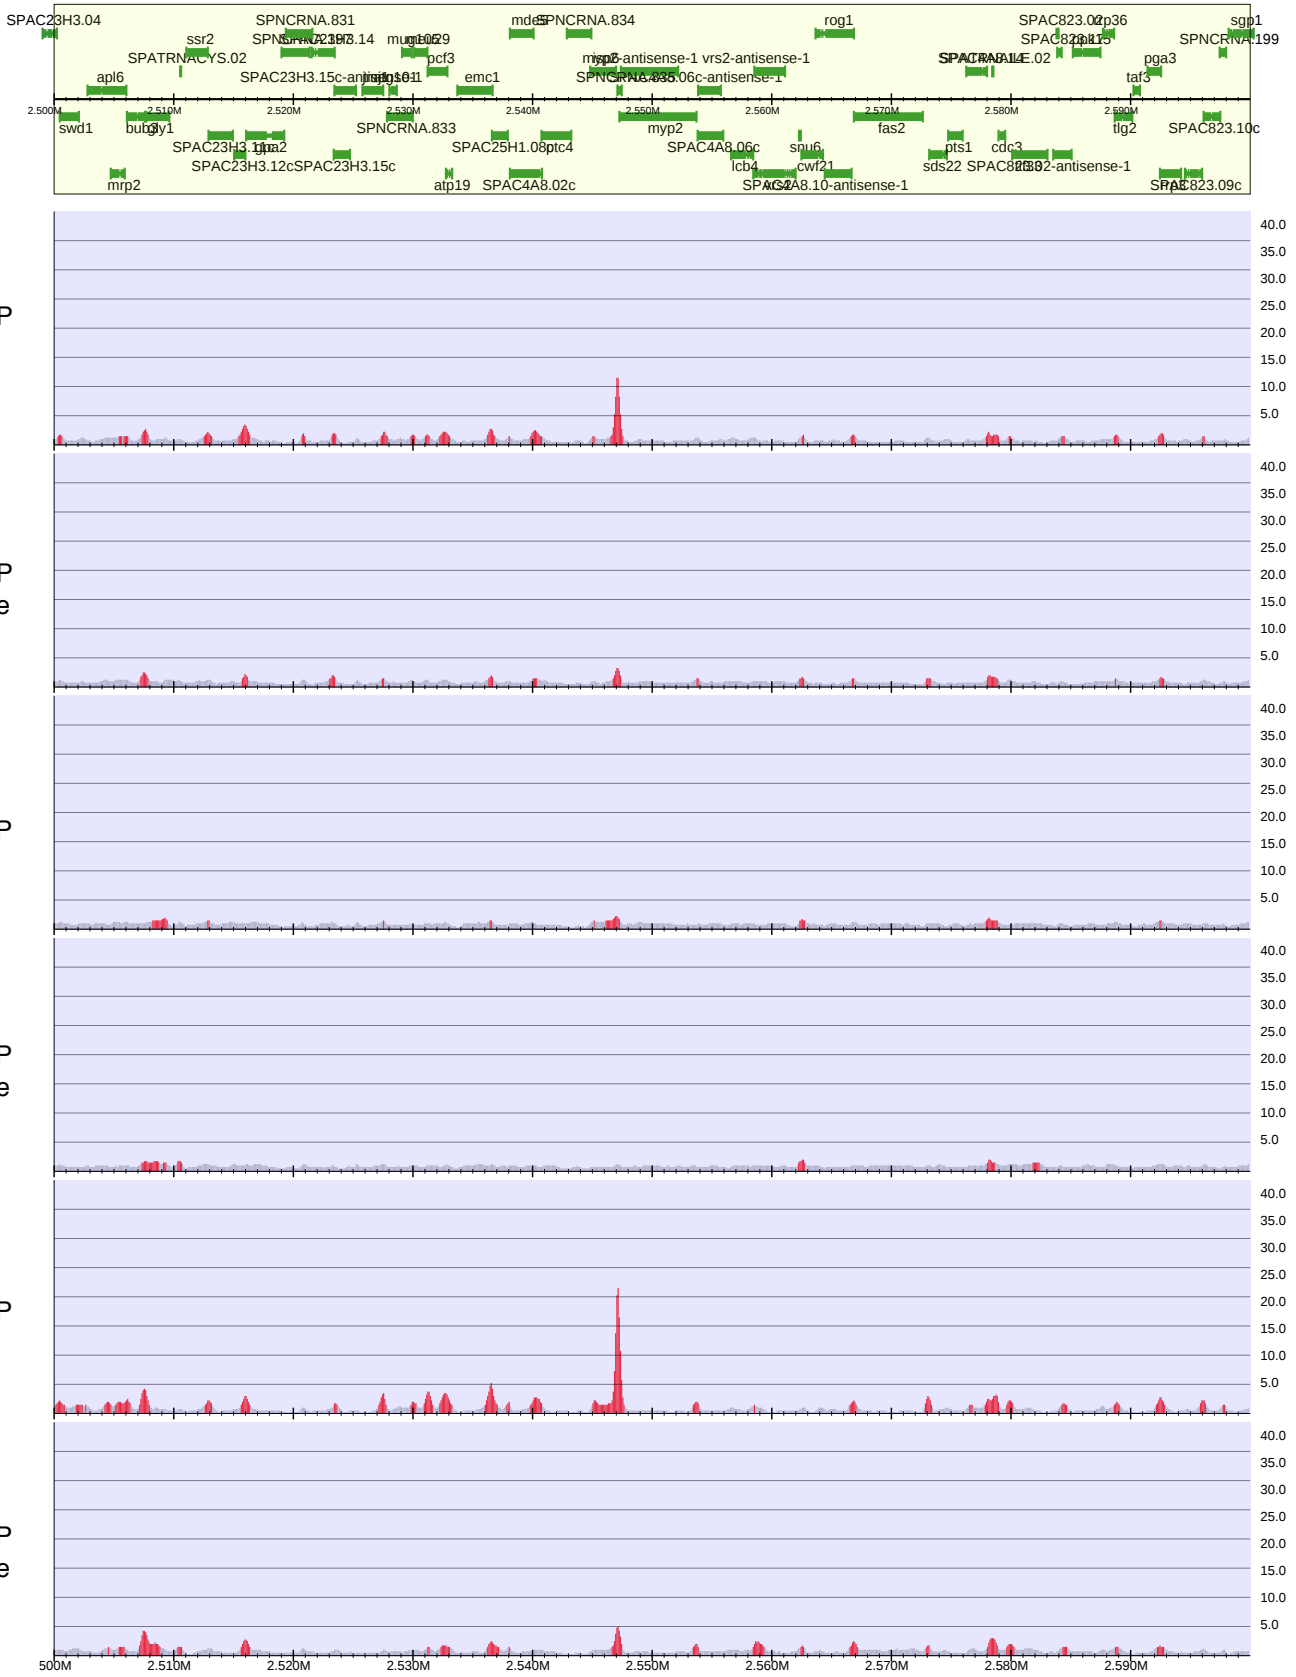

I\_1\_27

coding  
noncoding

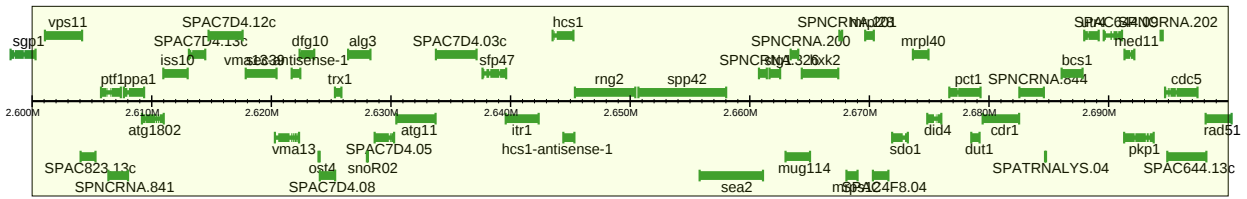

Rhn1-GFP  
meiotic

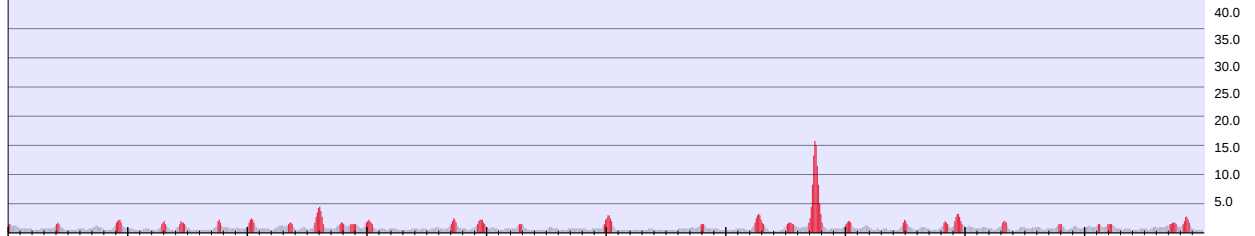

Rhn1-GFP  
vegetative

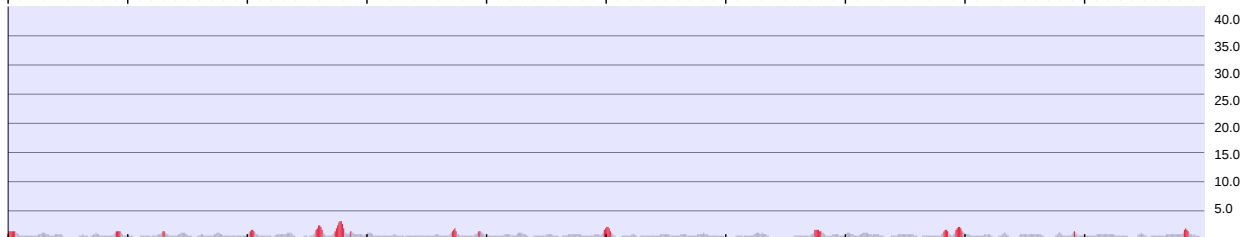

Pab2-GFP  
meiotic

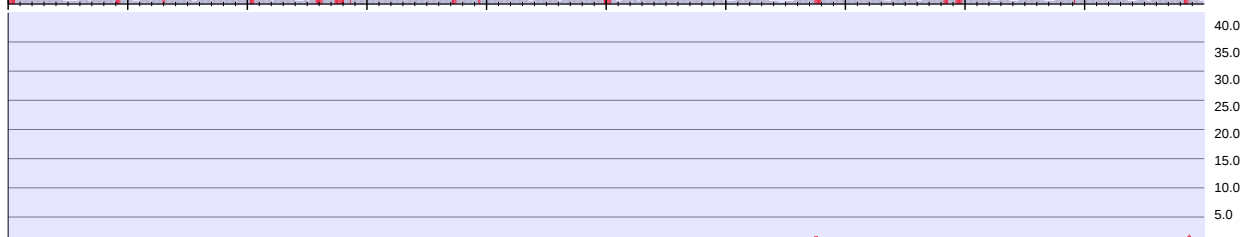

Pab2-GFP  
vegetative

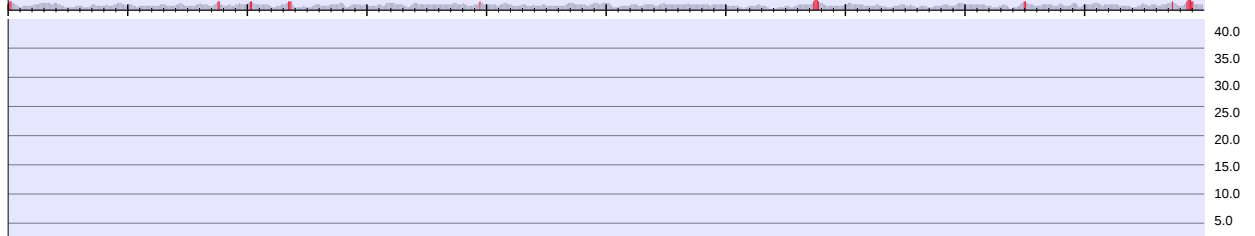

Seb1-GFP  
meiotic

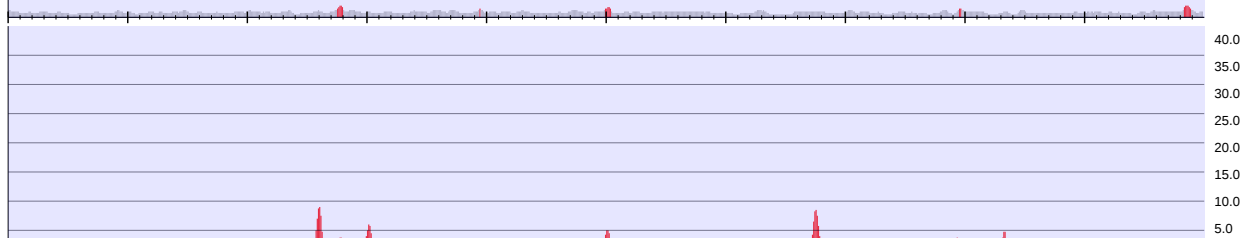

Seb1-GFP  
vegetative

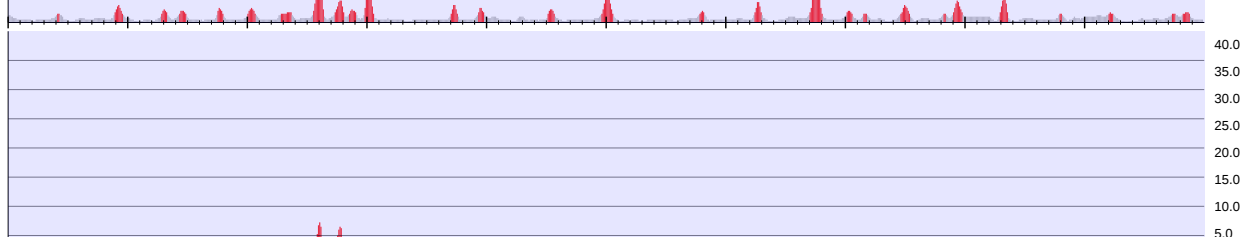

600M 2.610M 2.620M 2.630M 2.640M 2.650M 2.660M 2.670M 2.680M 2.690M

I\_1\_28

coding  
noncoding

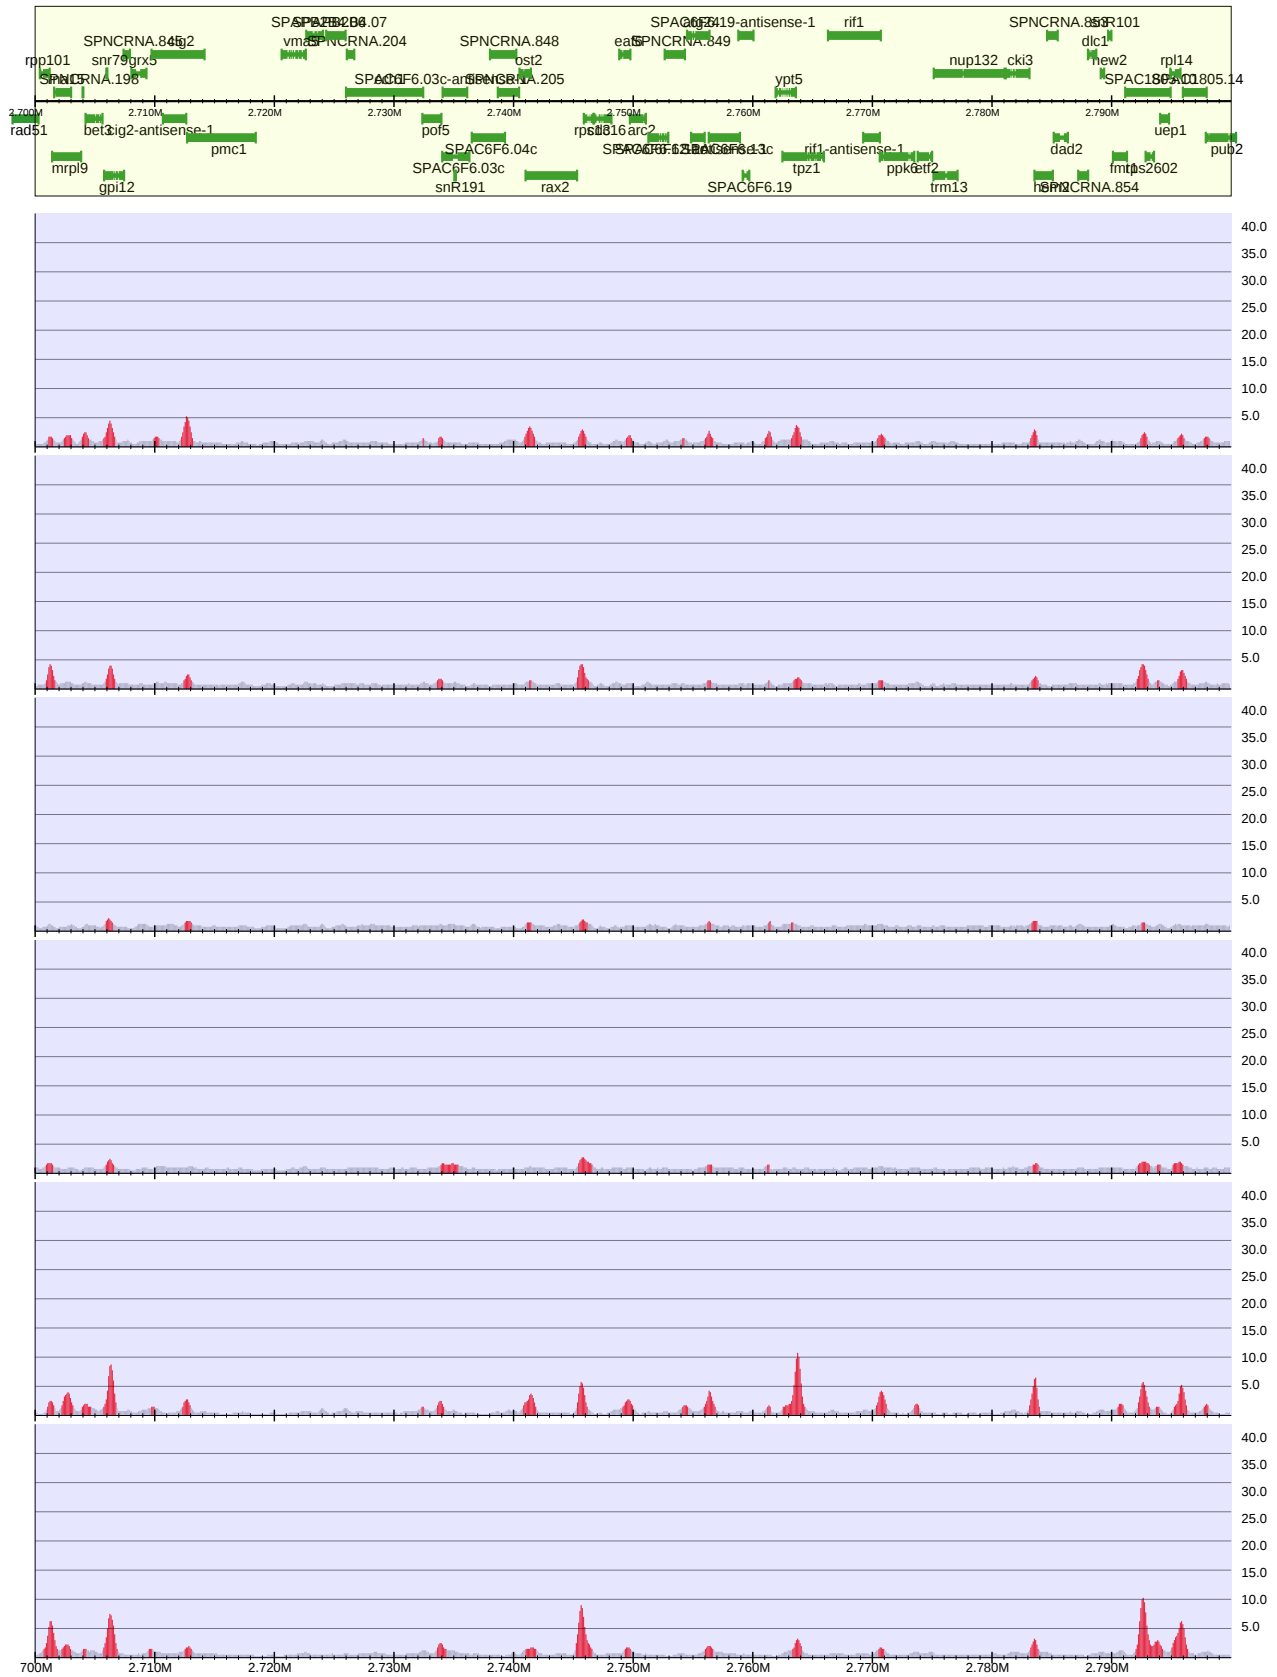



I\_1\_29

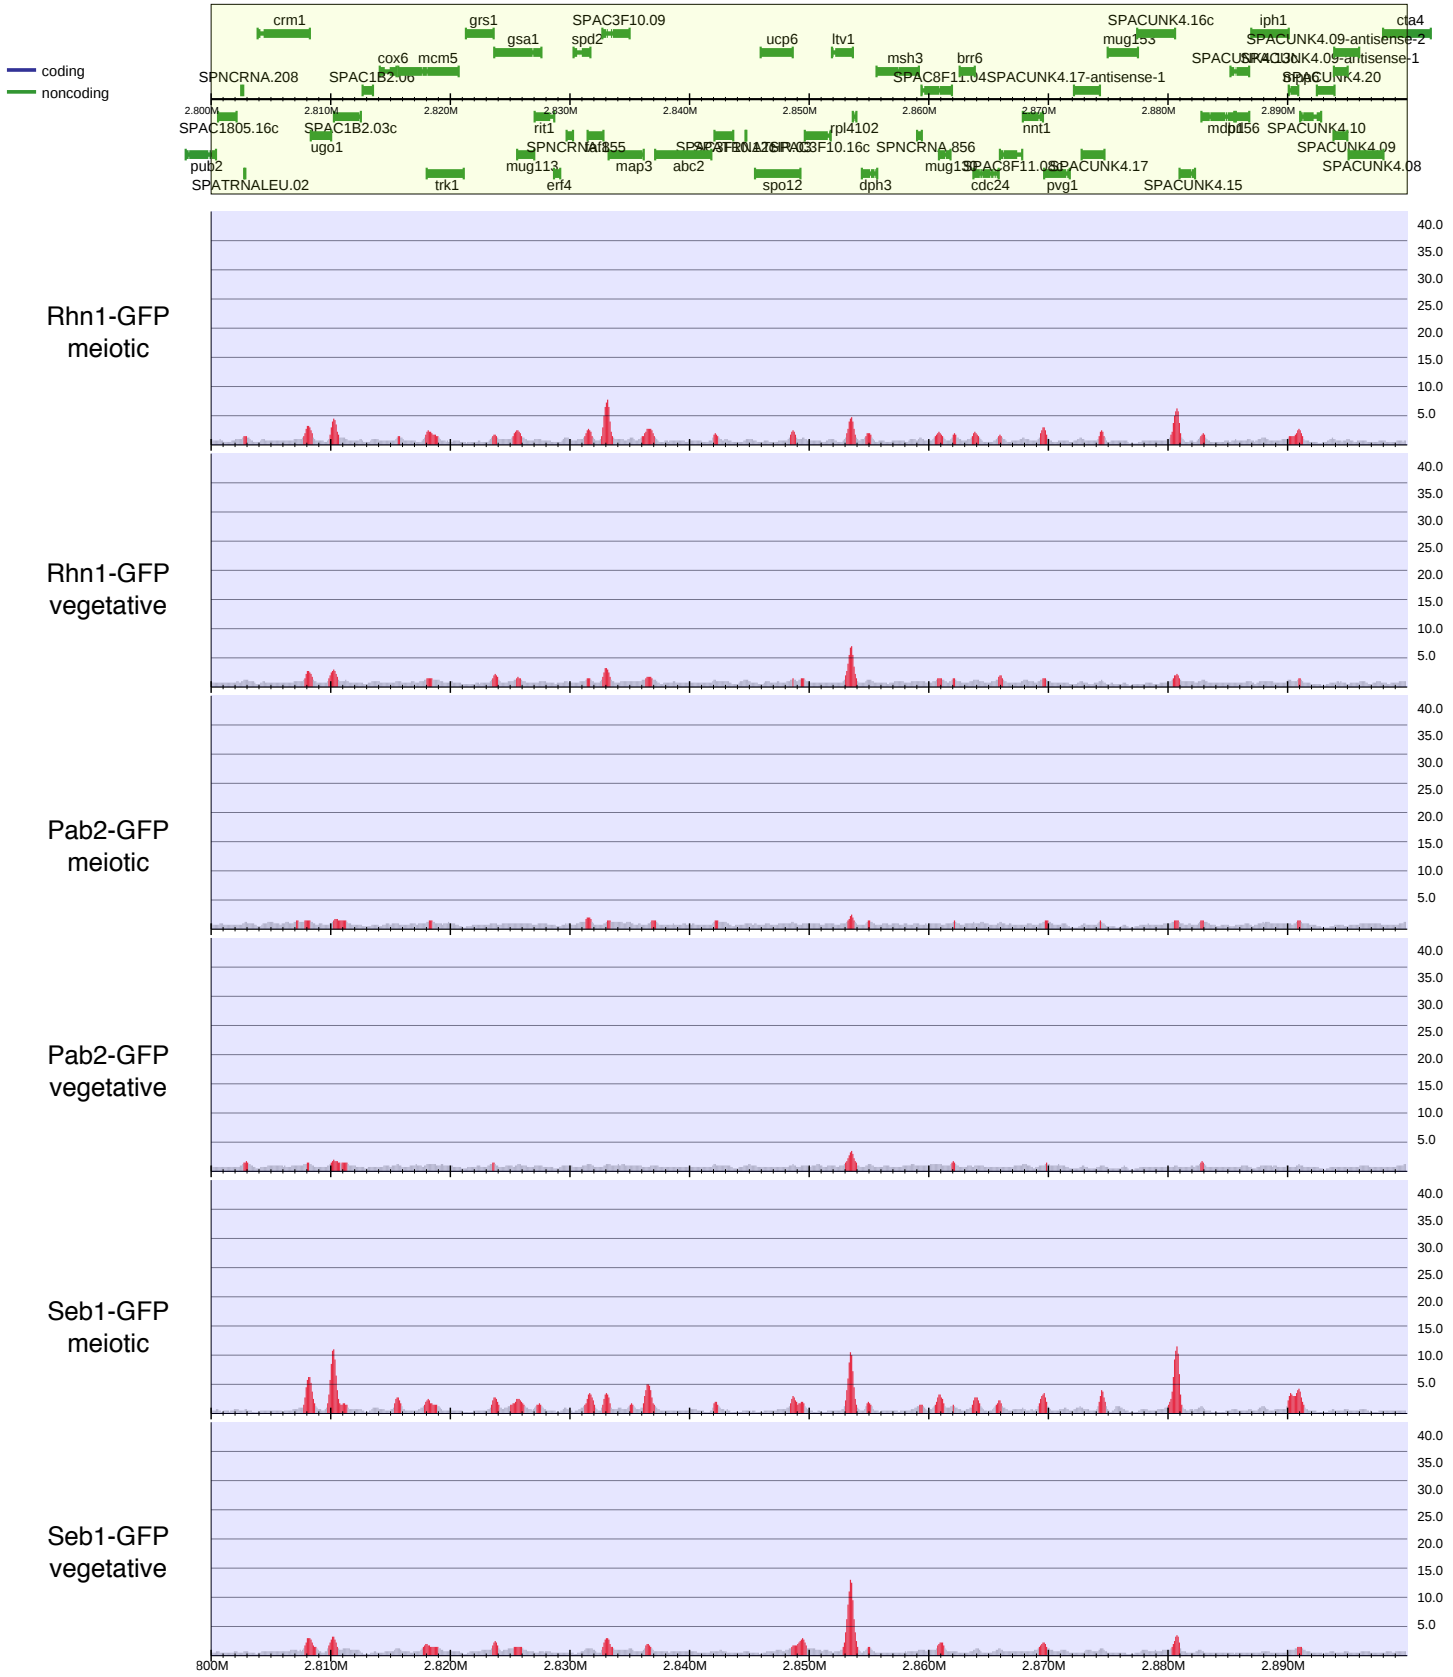



I\_1\_31

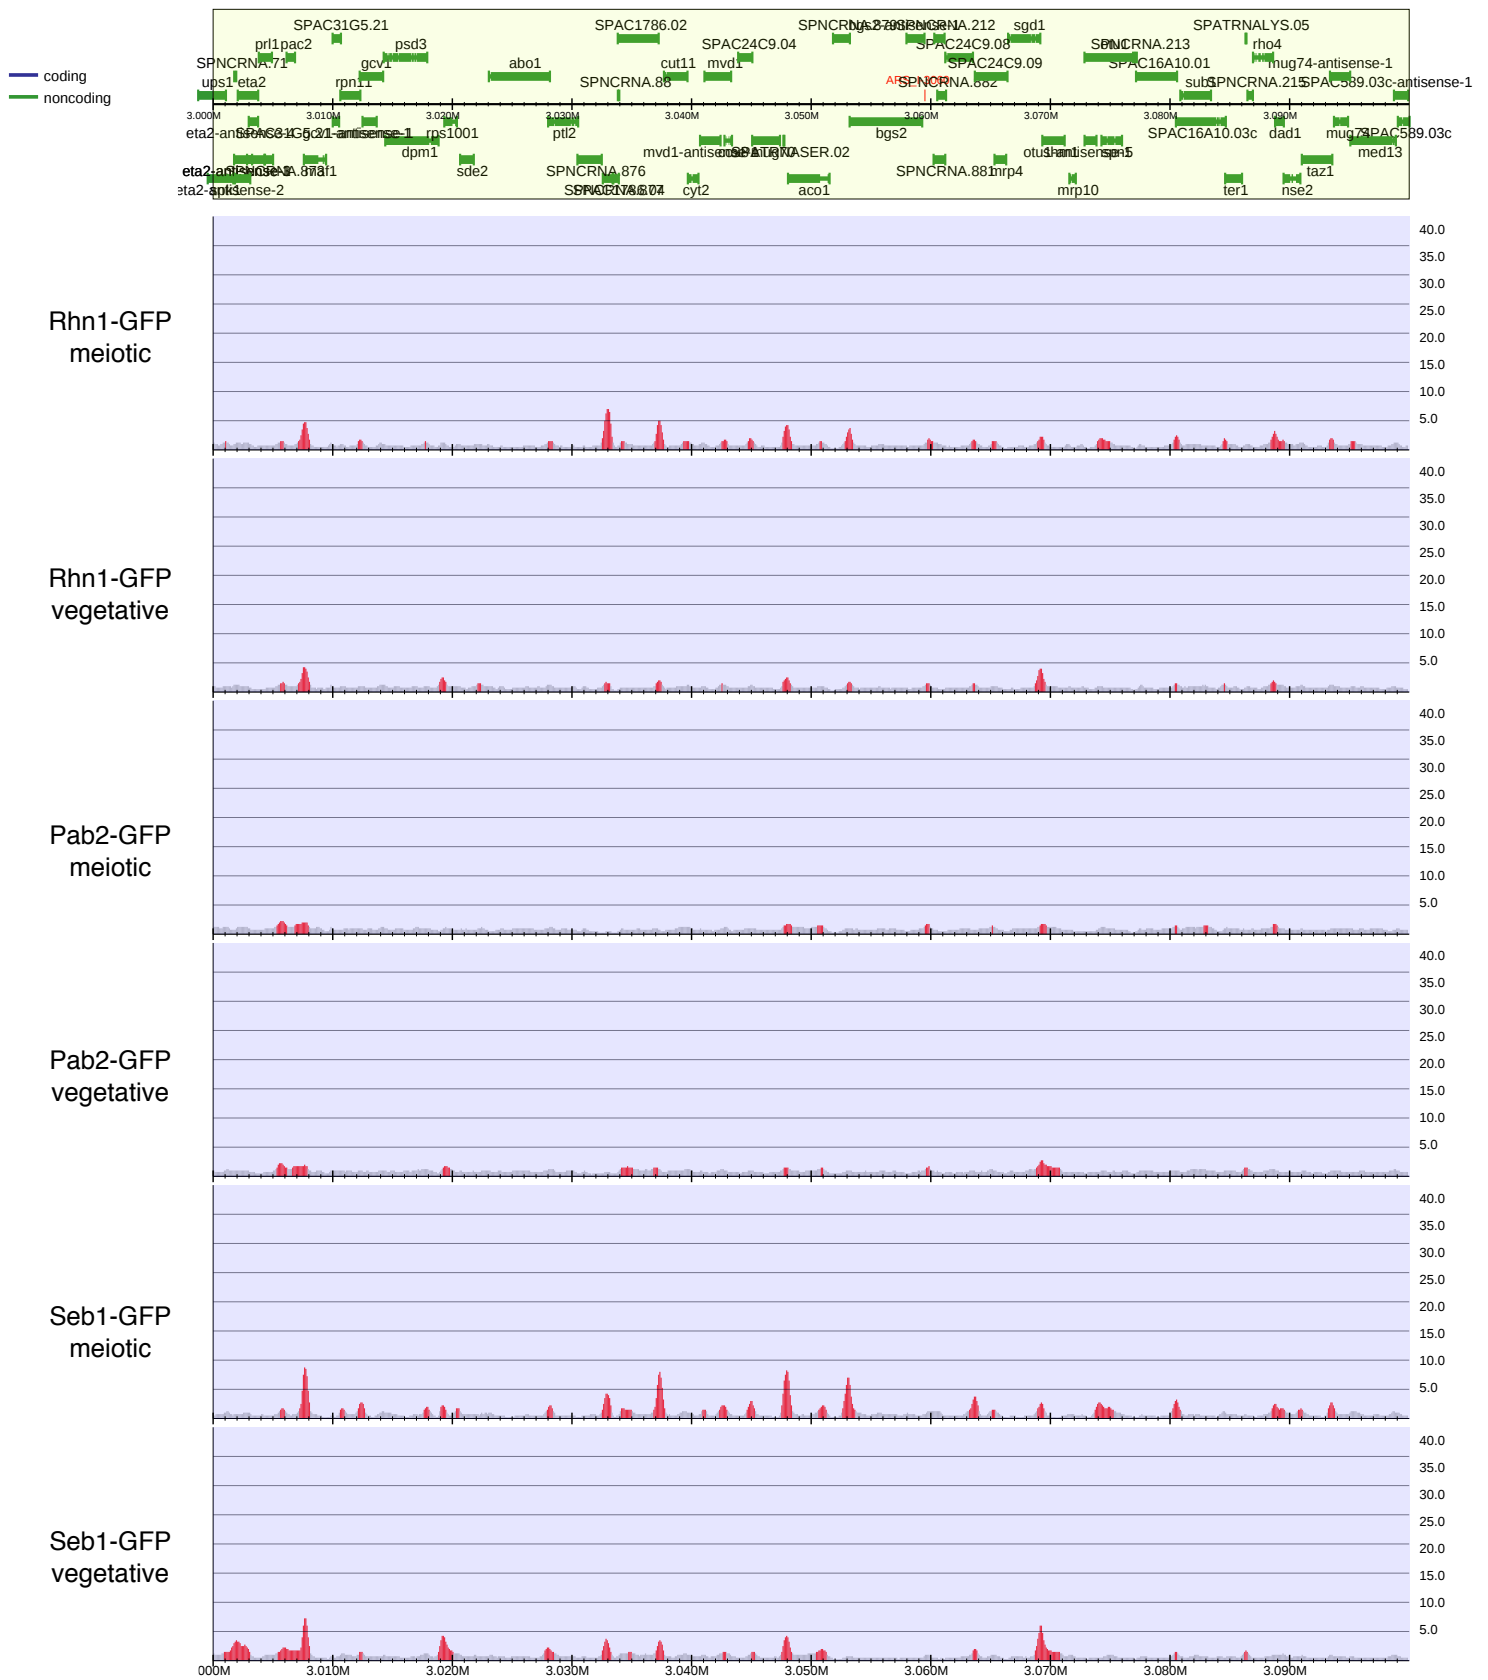

I\_1\_32

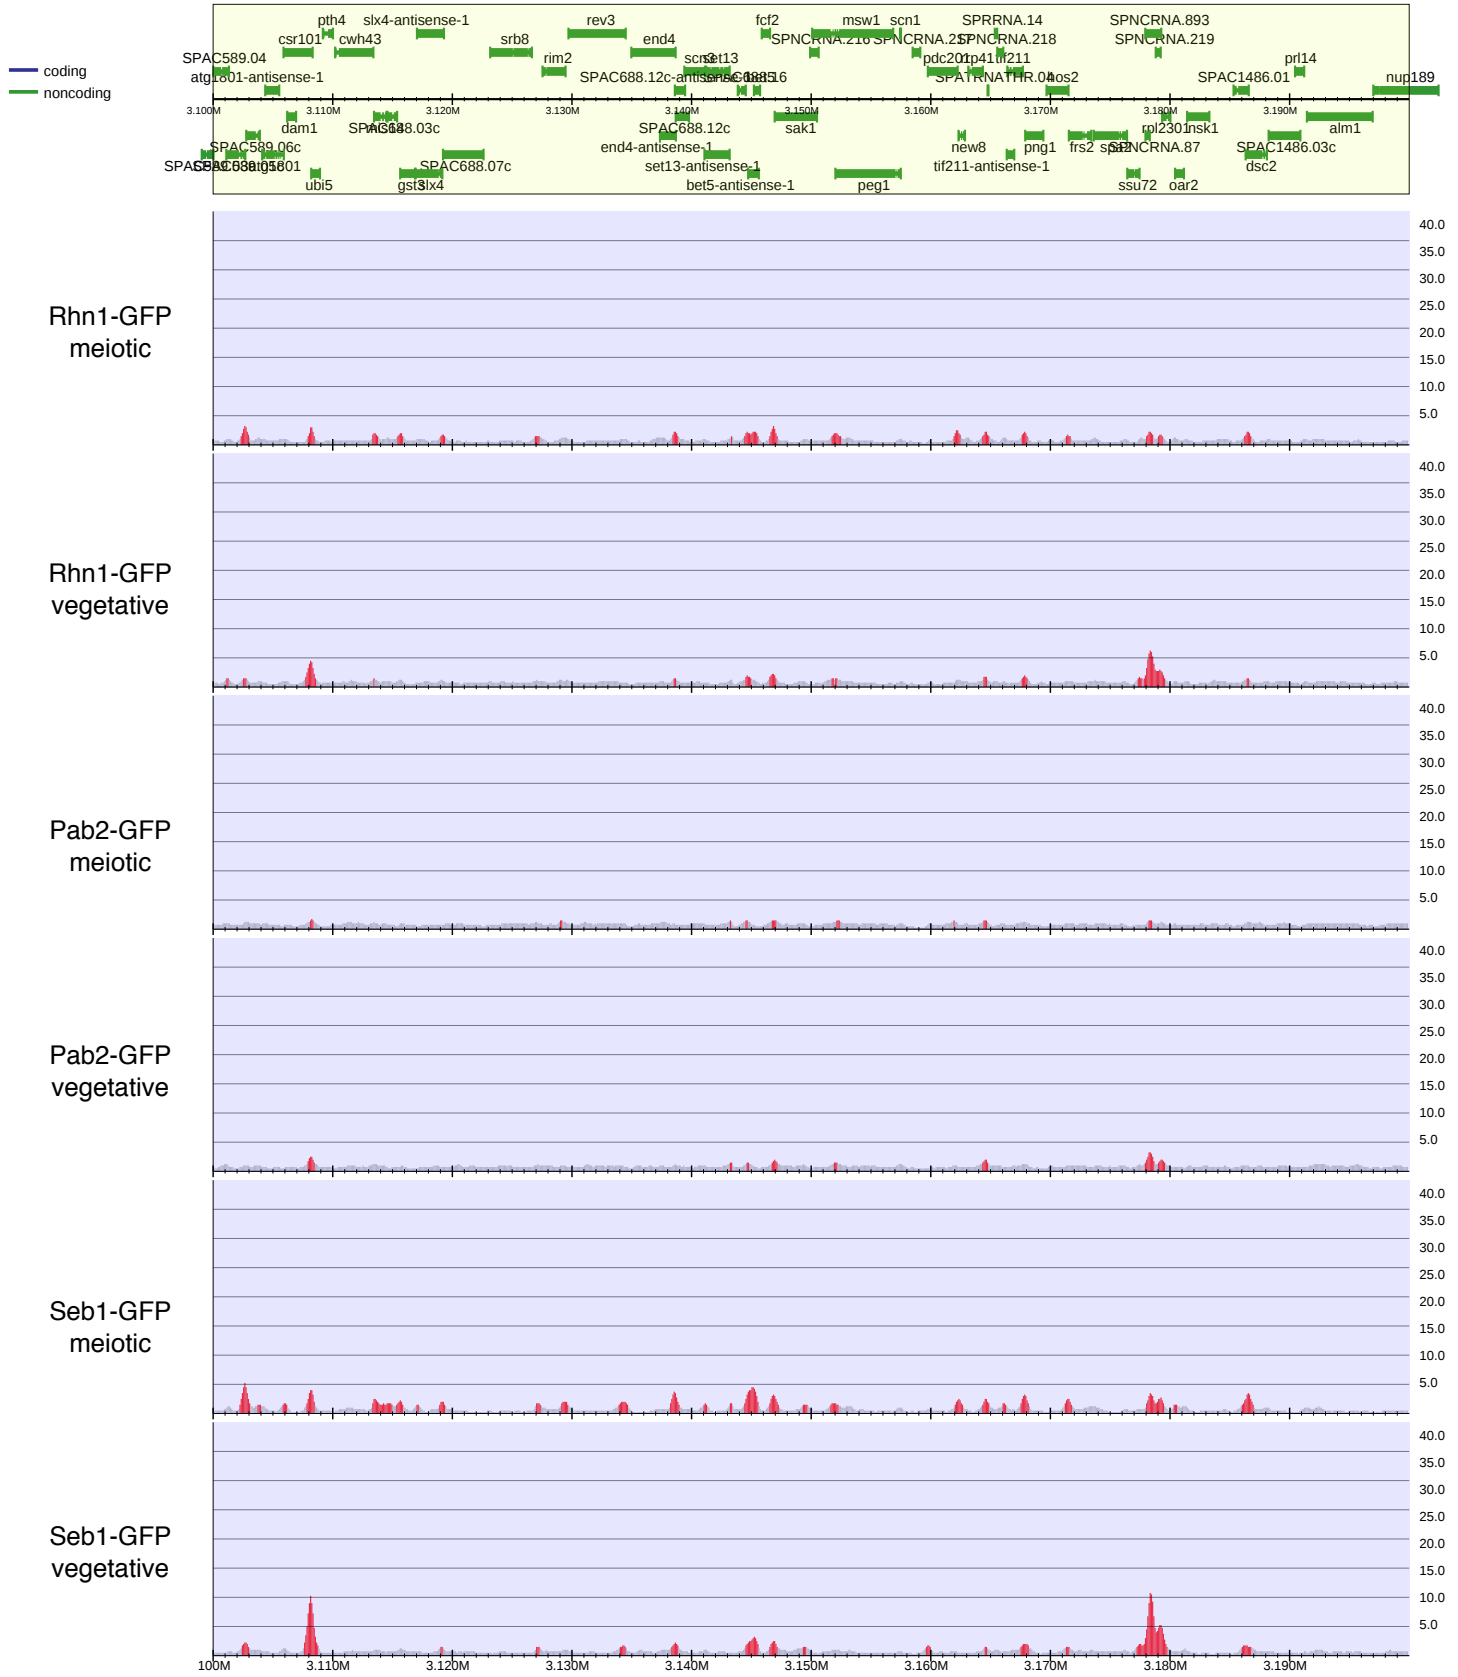

I\_1\_33

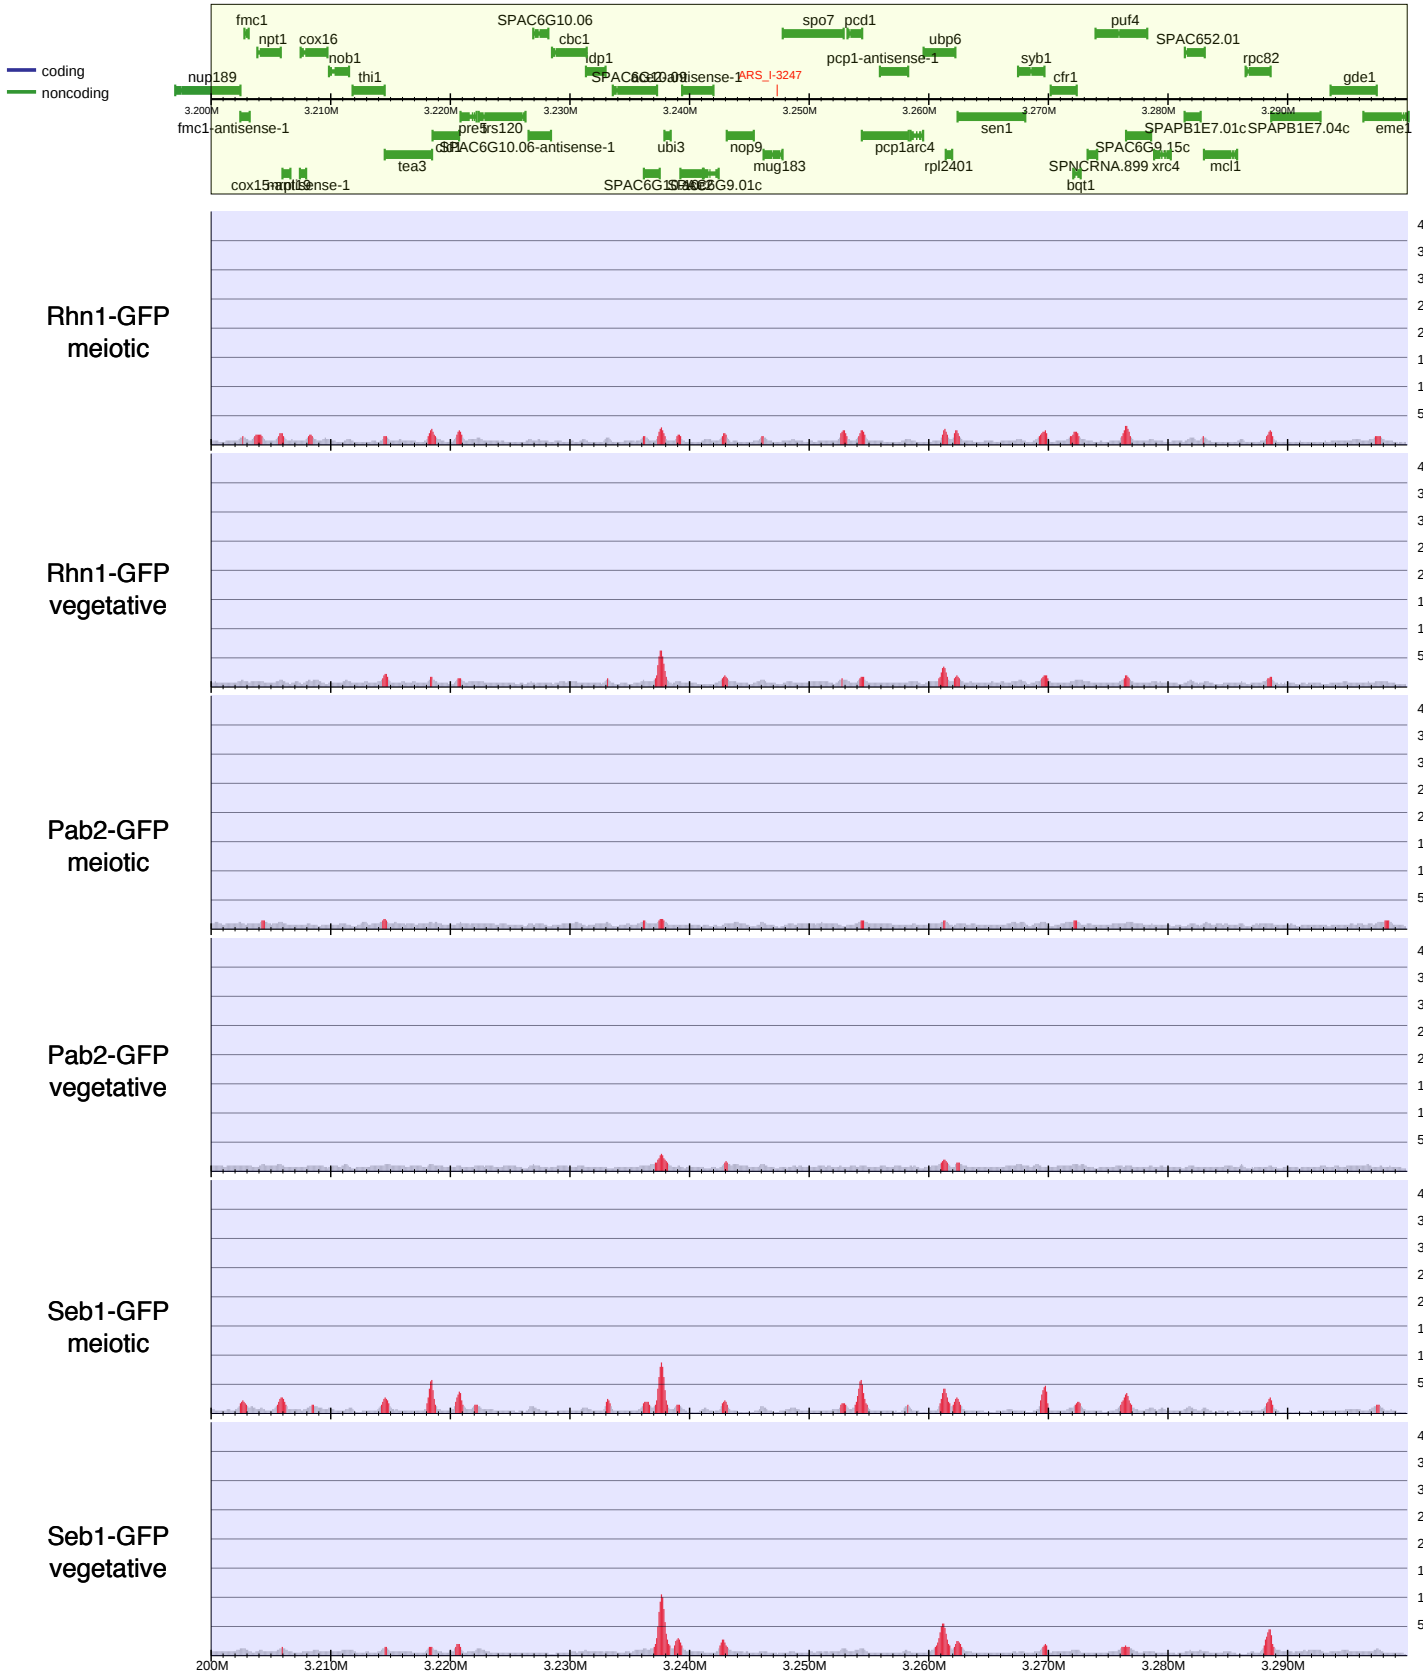



I\_1\_35

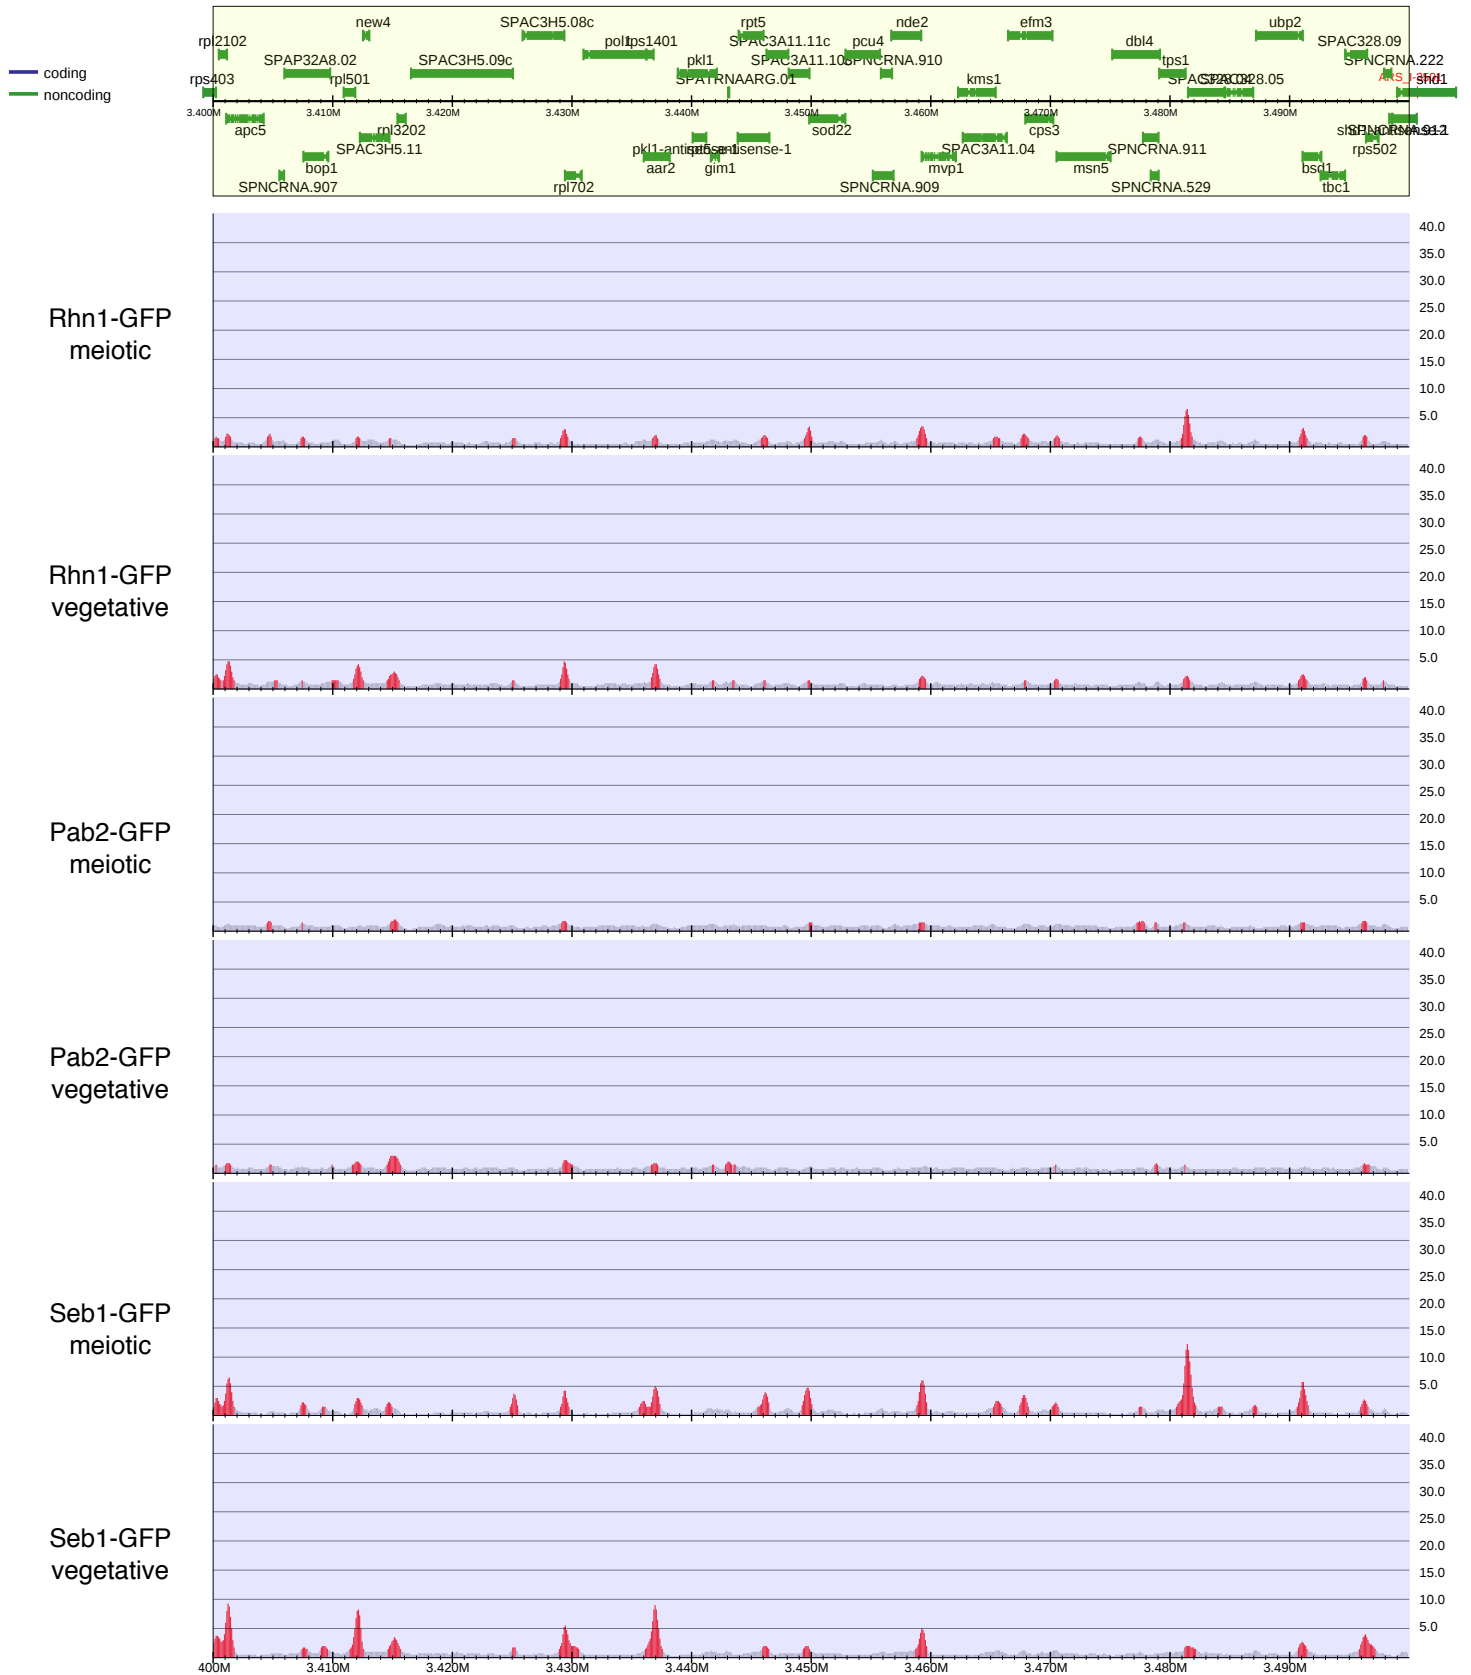





I\_1\_37

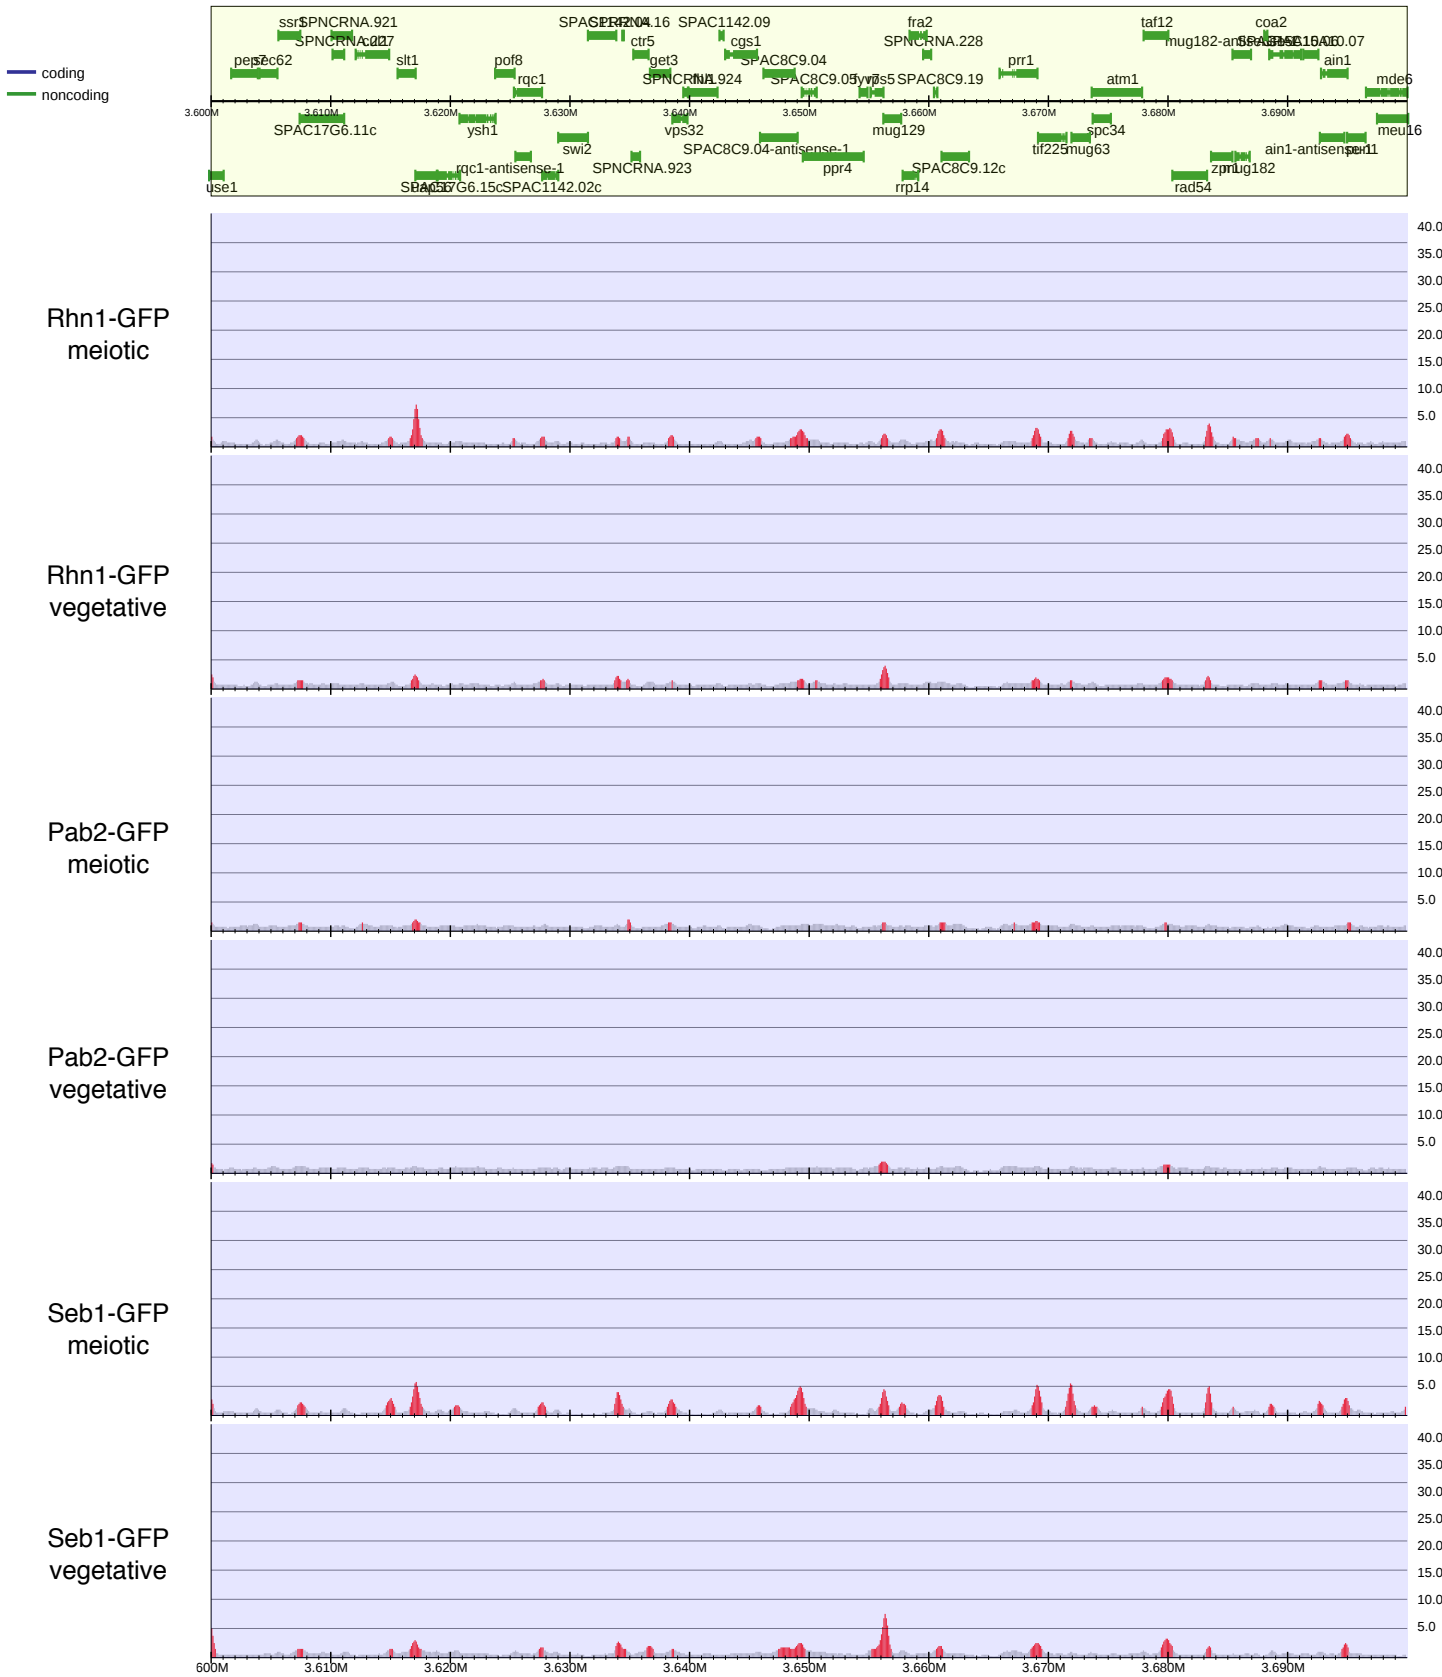

I\_1\_38

coding  
noncoding

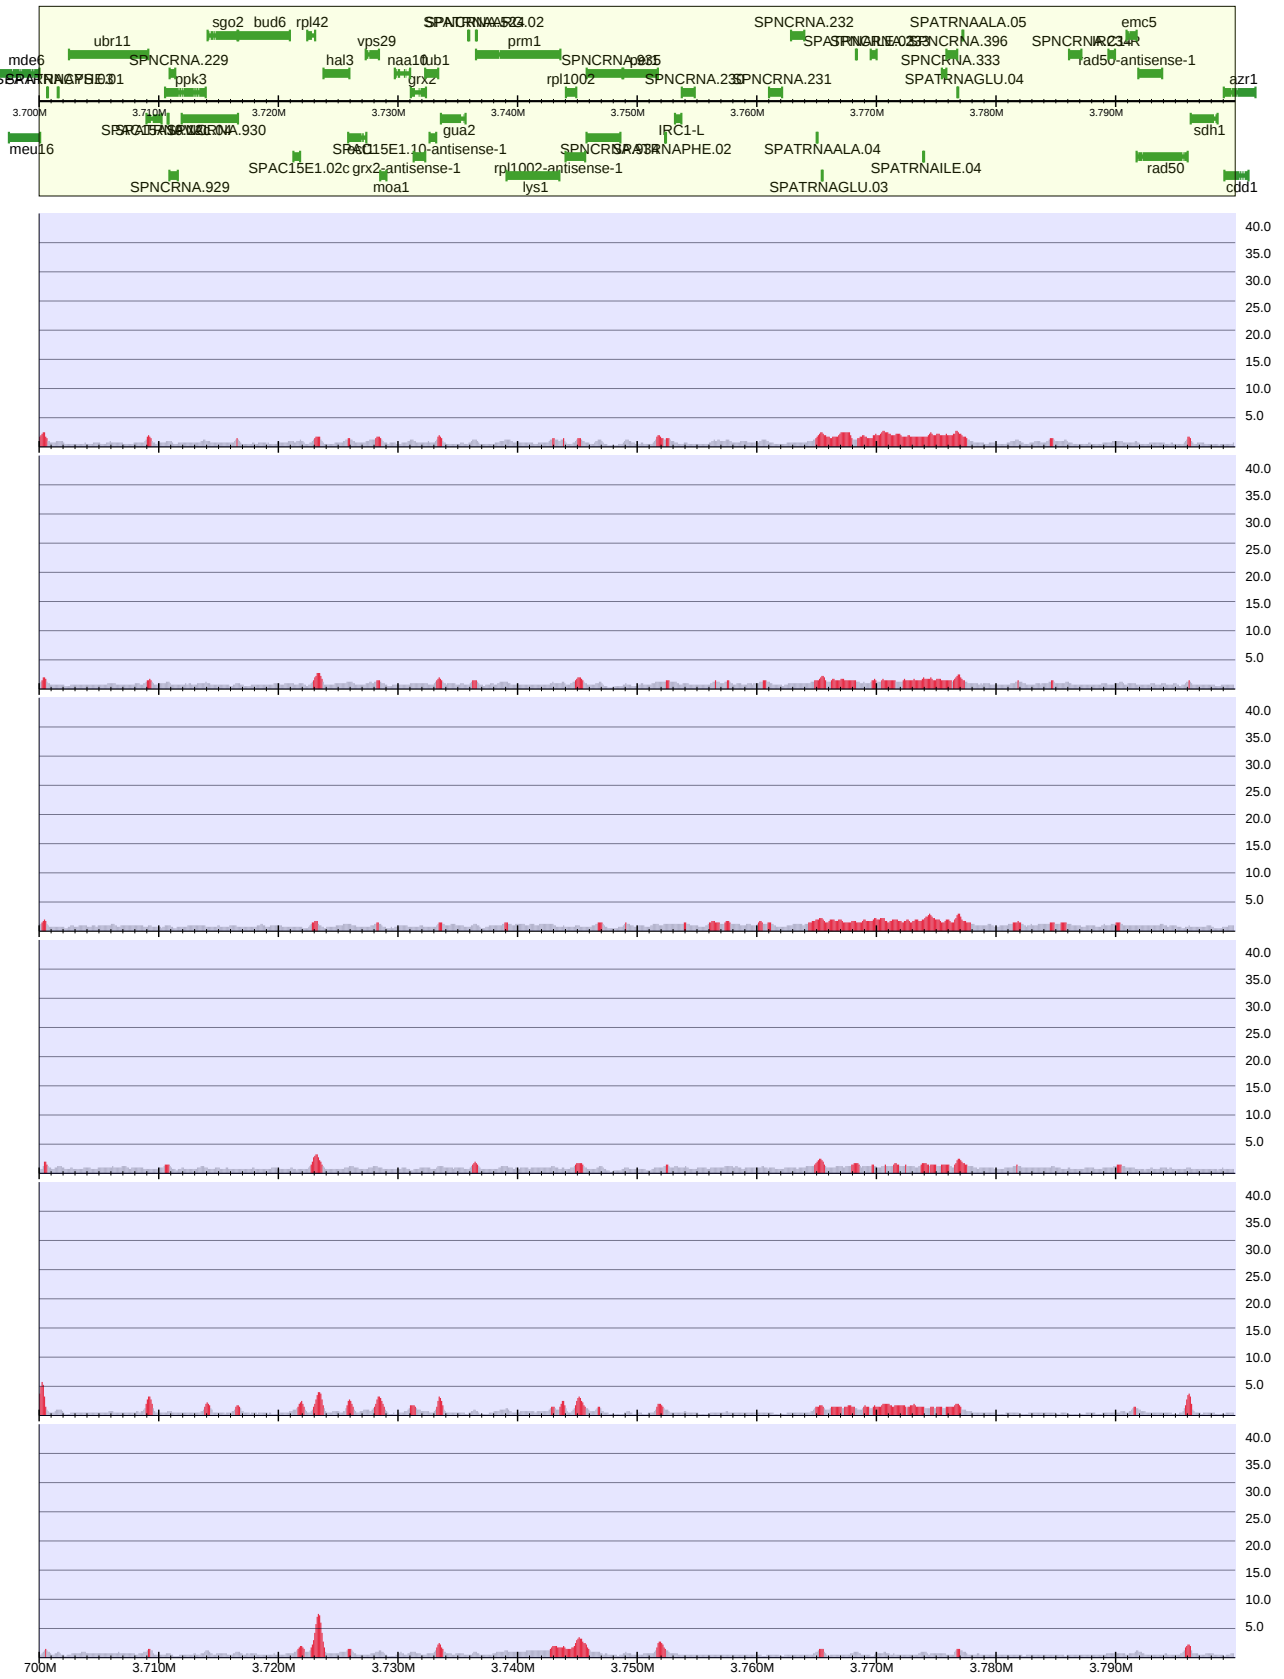

I\_1\_39

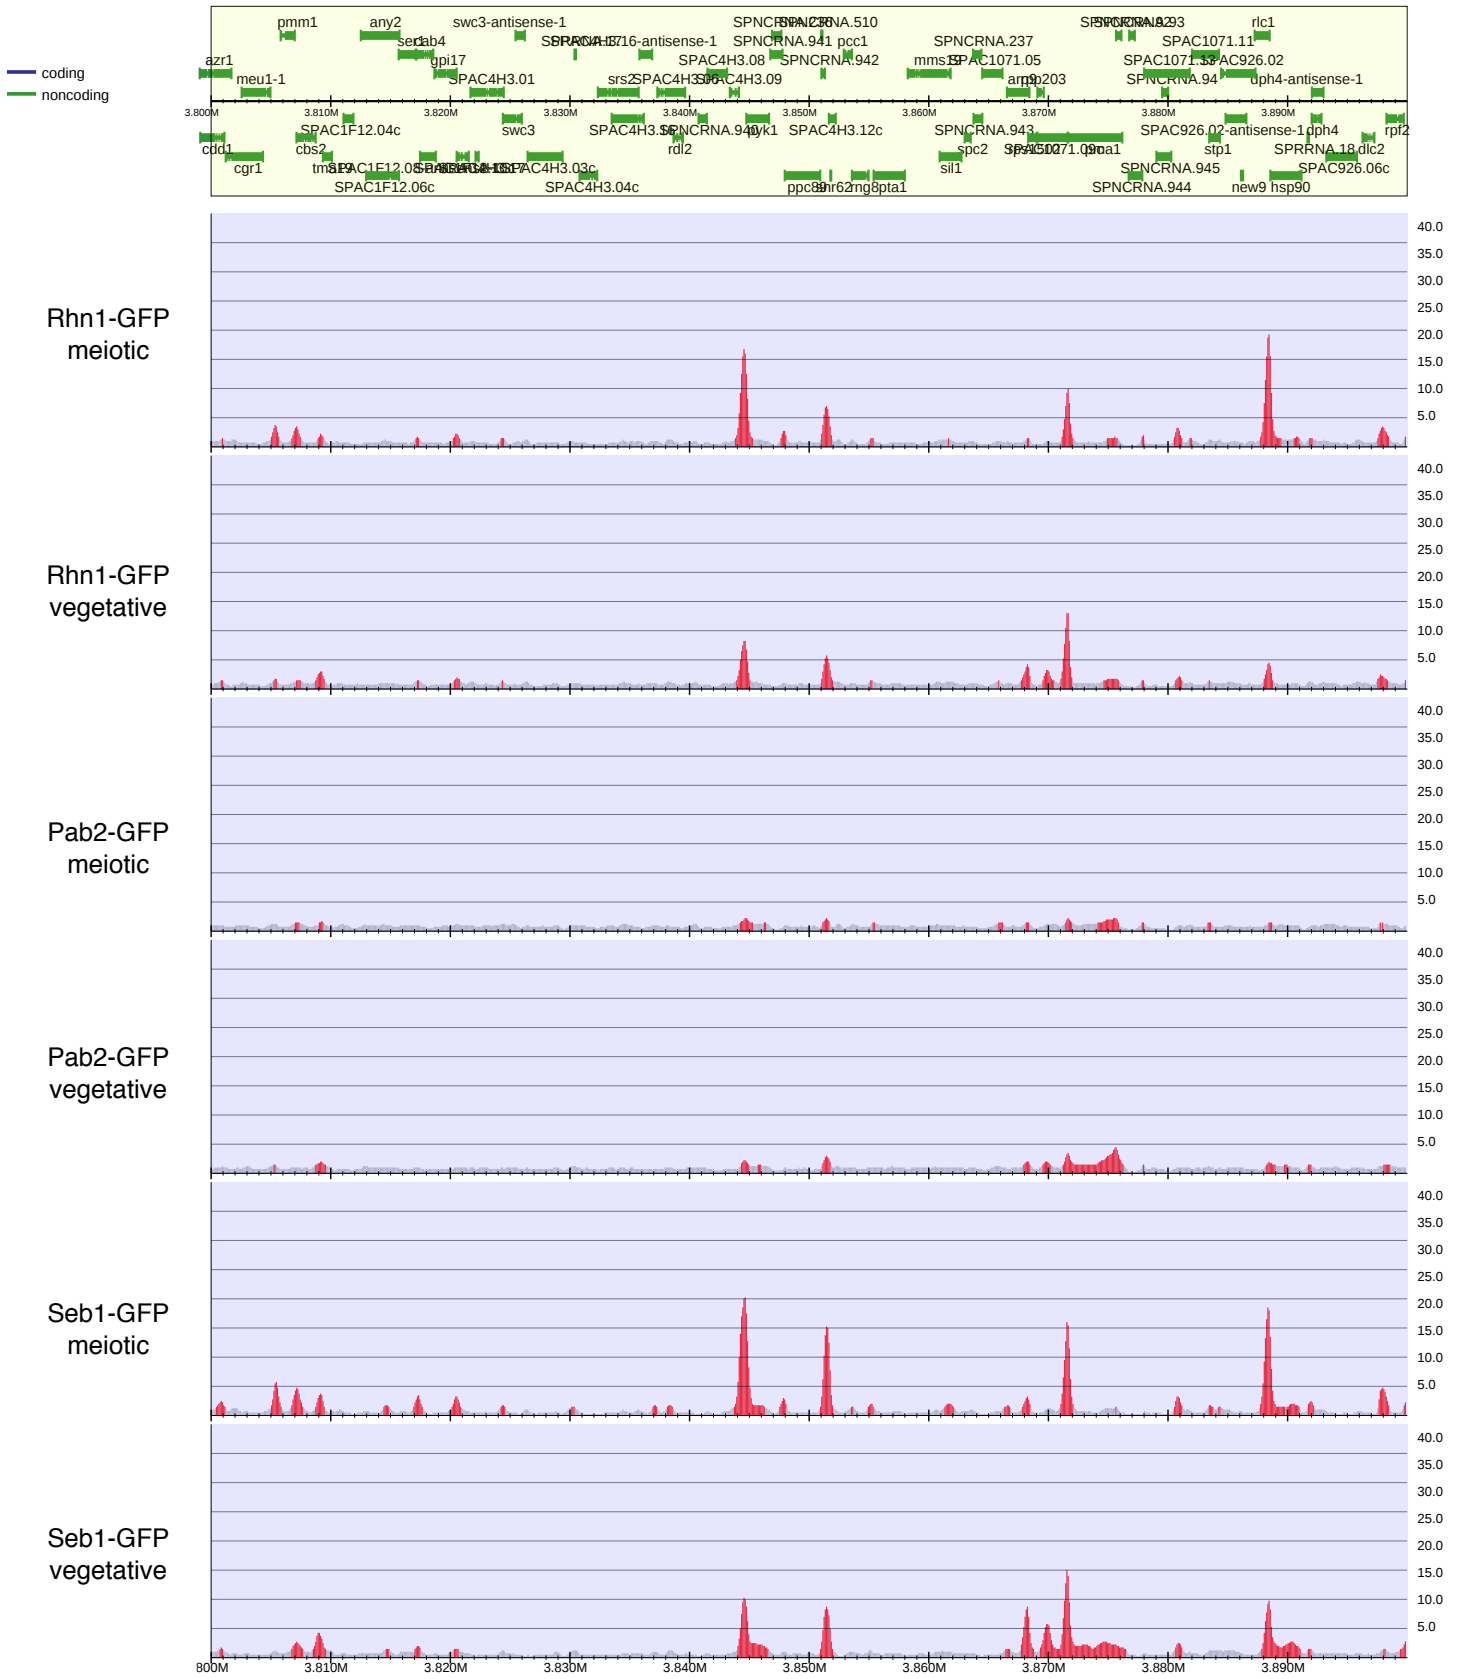

I\_1\_40

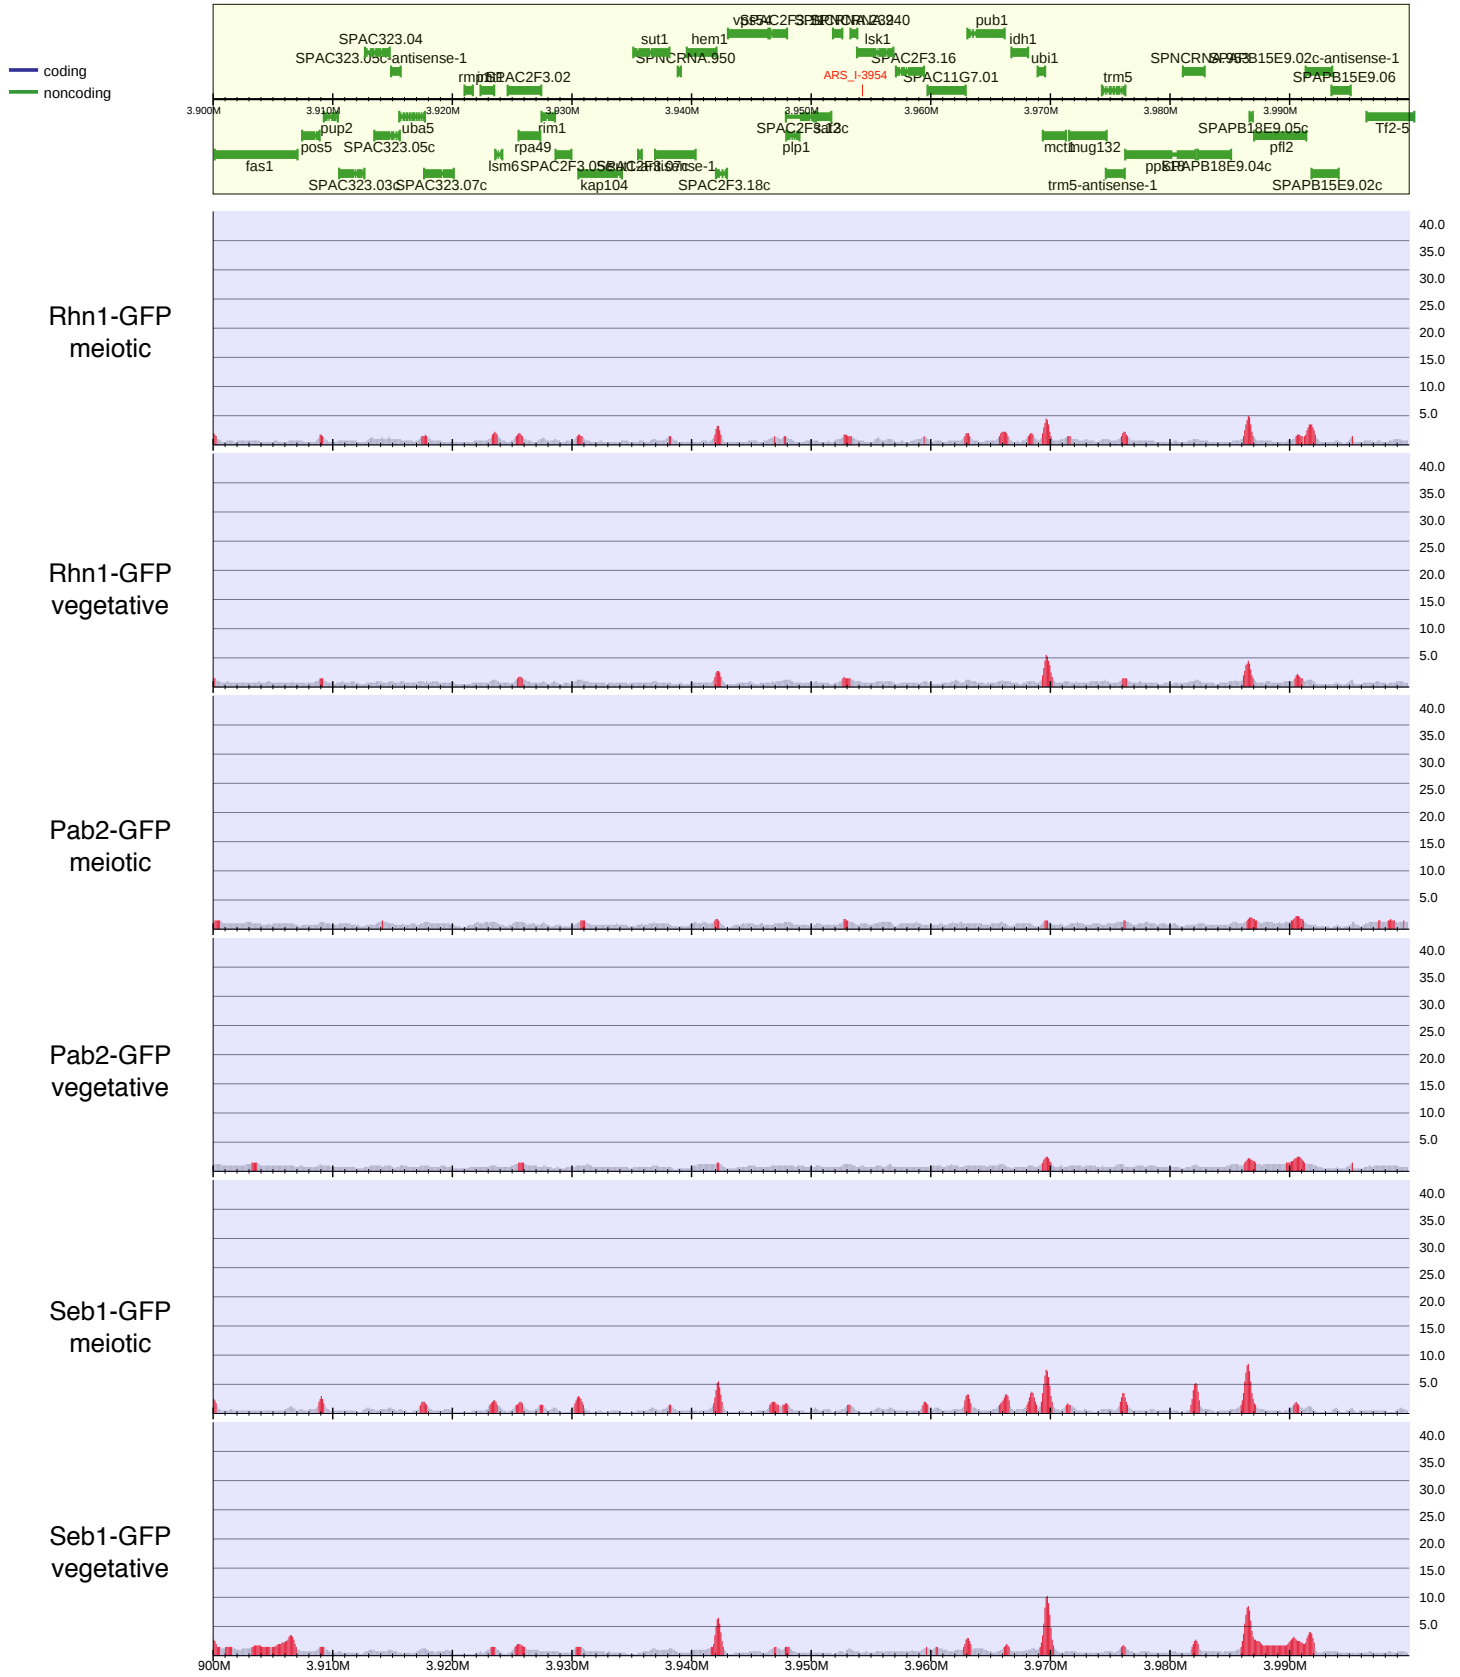

I\_1\_41

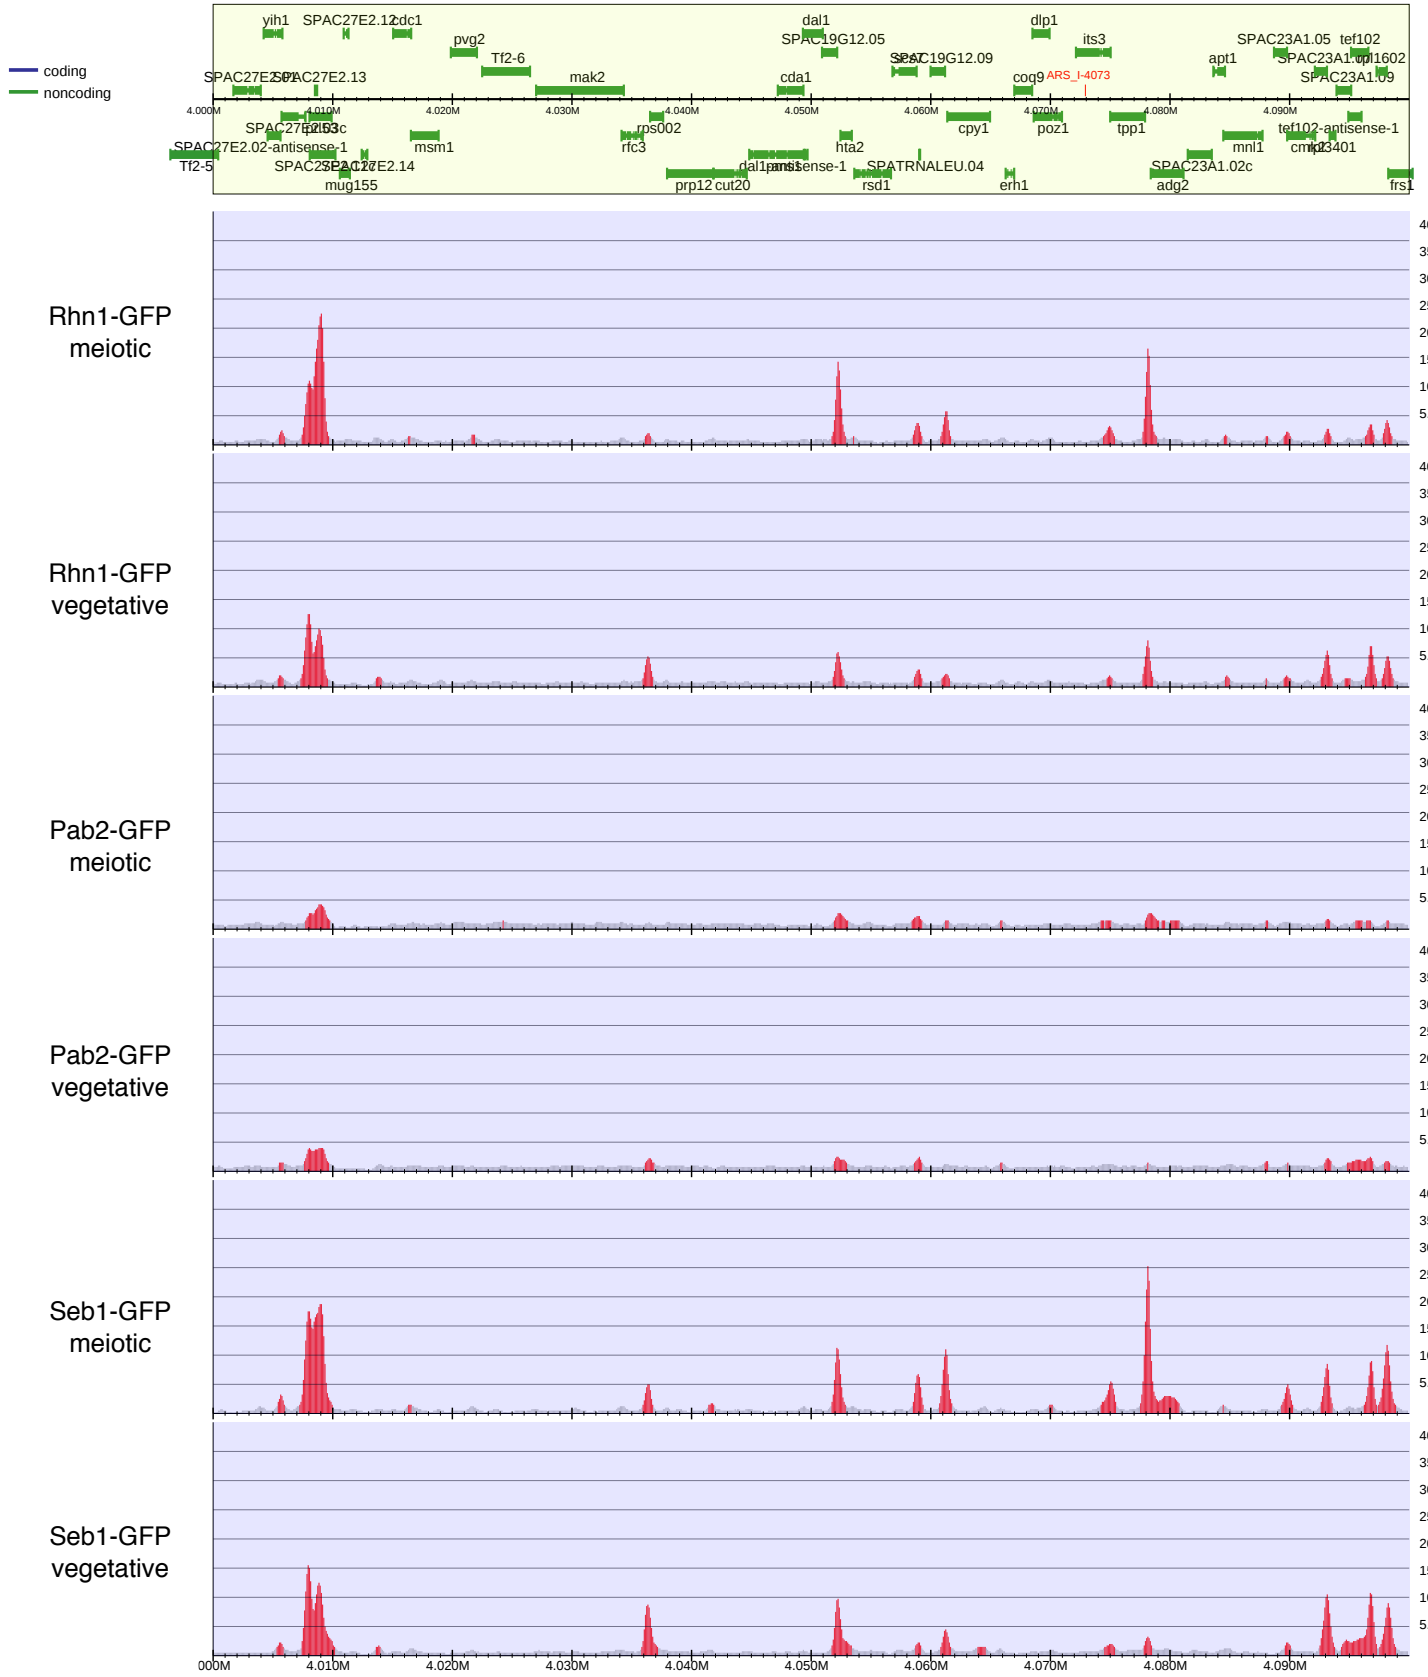



I\_1\_43

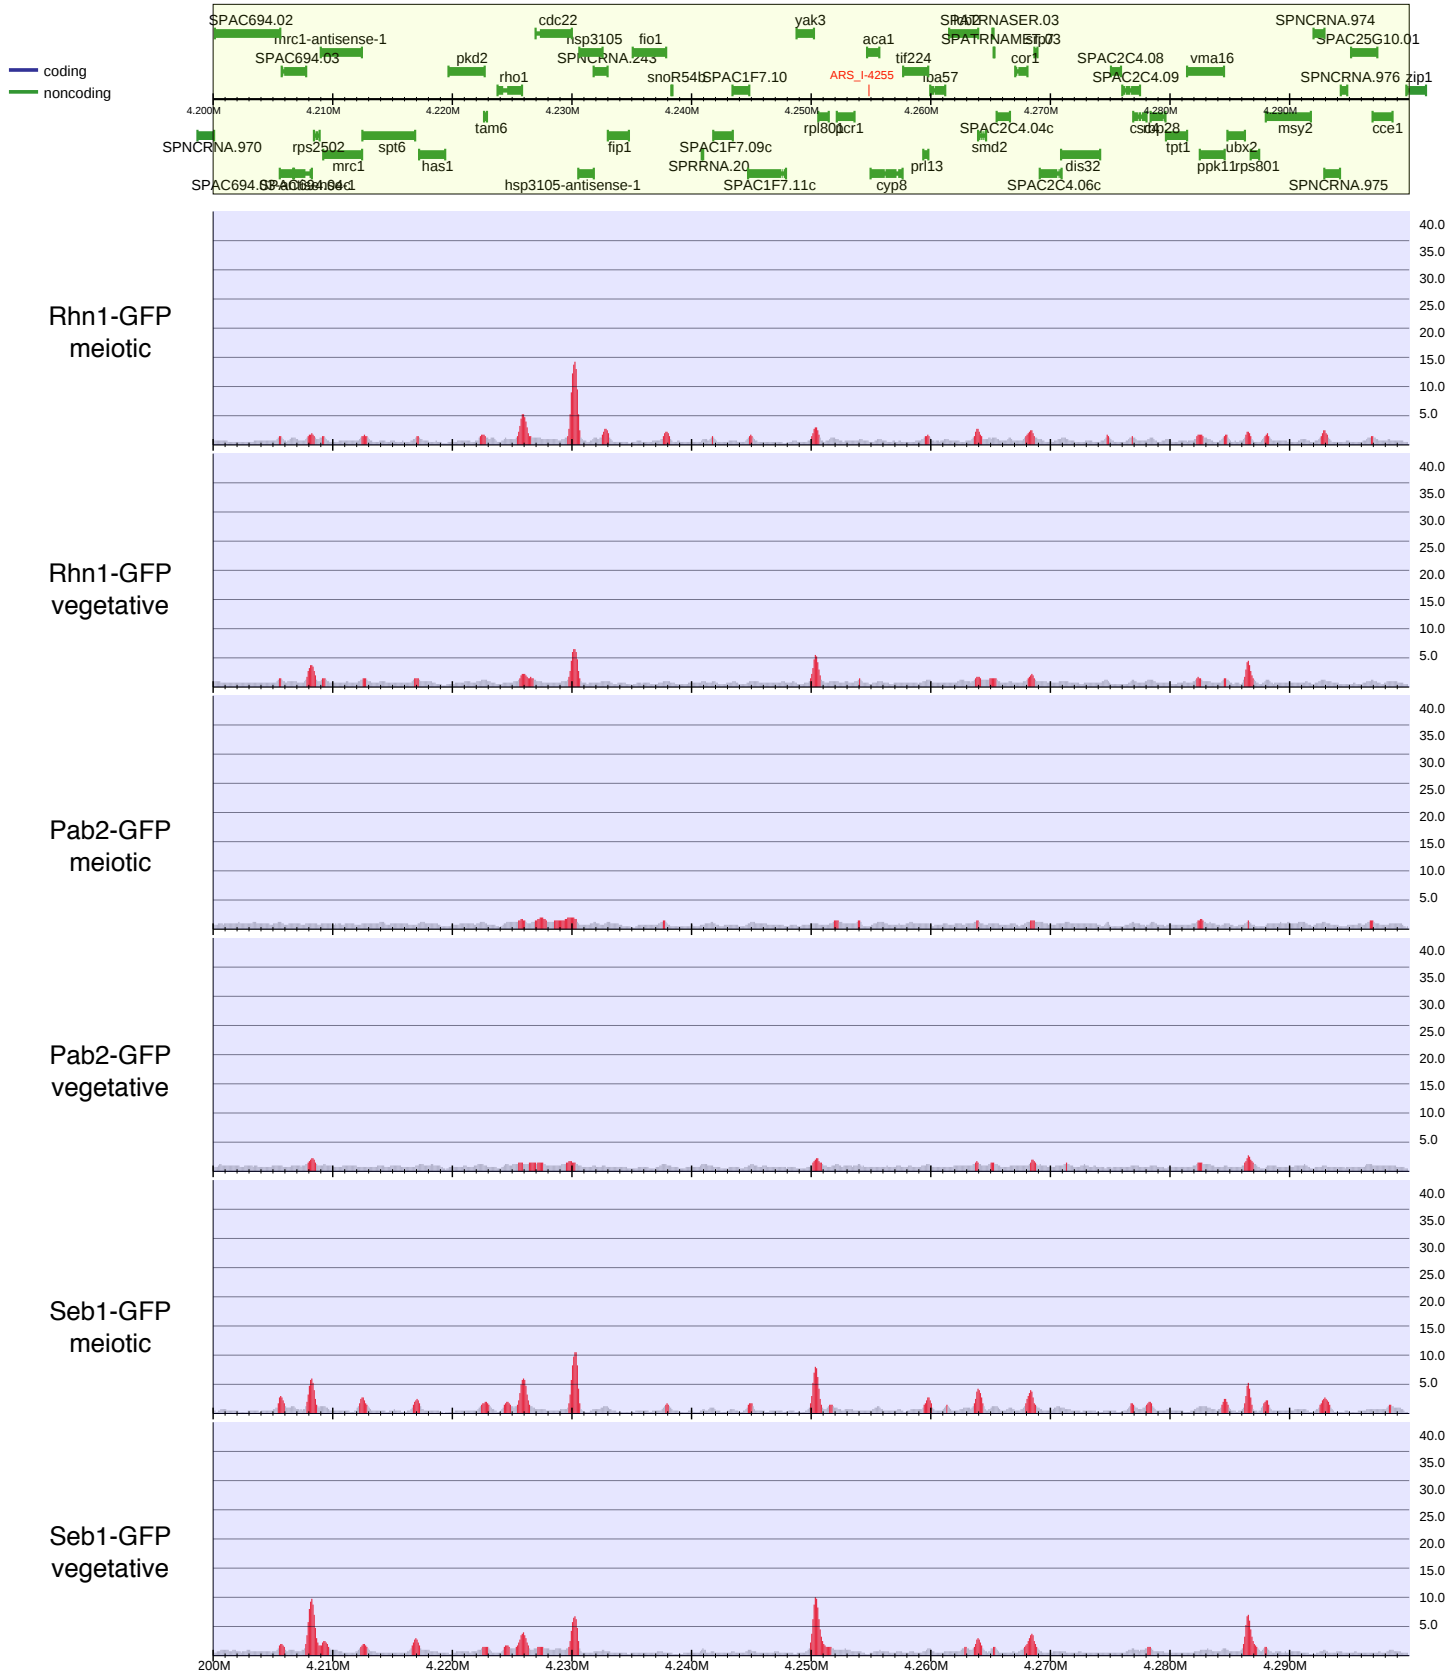

I\_1\_44

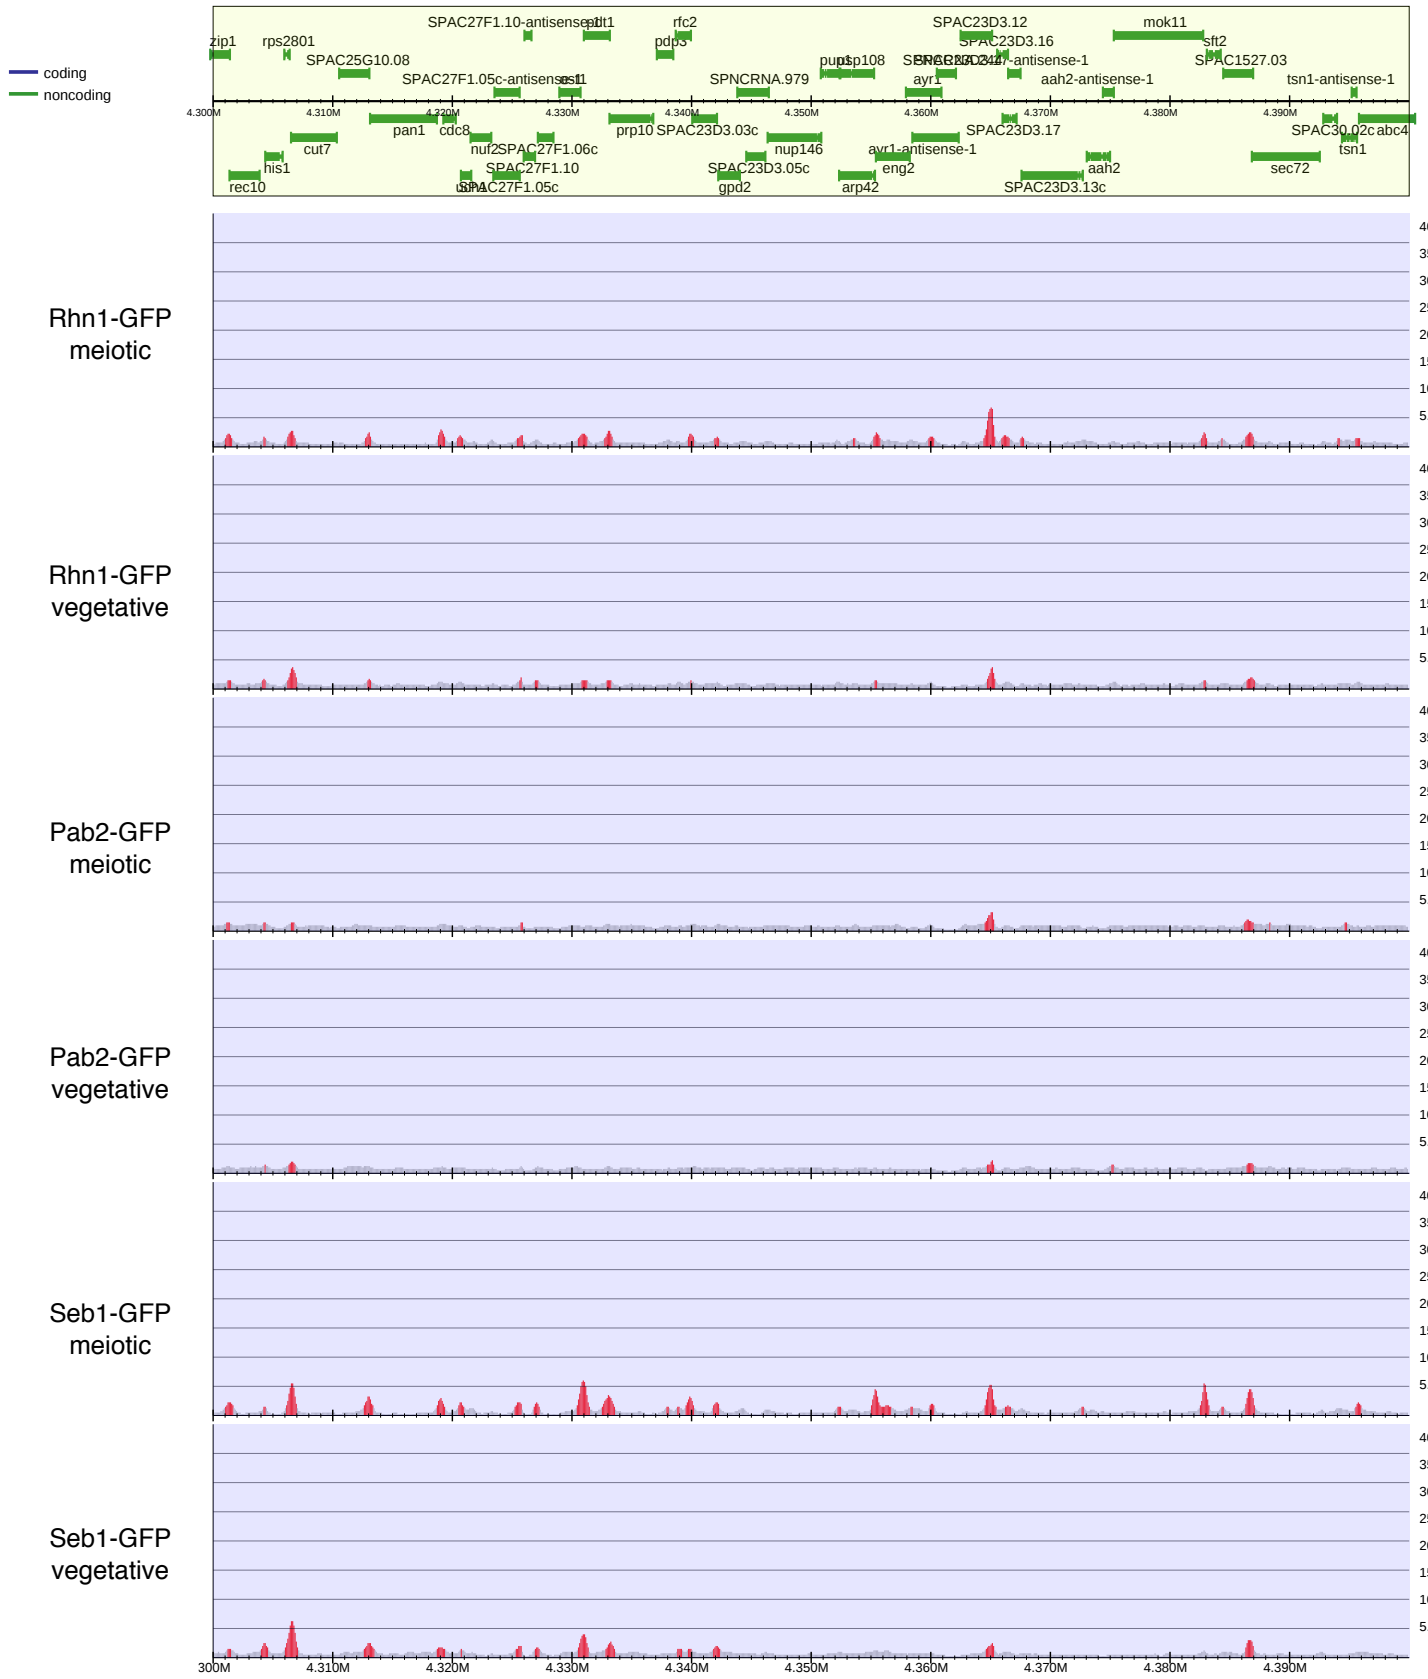



I\_1\_45

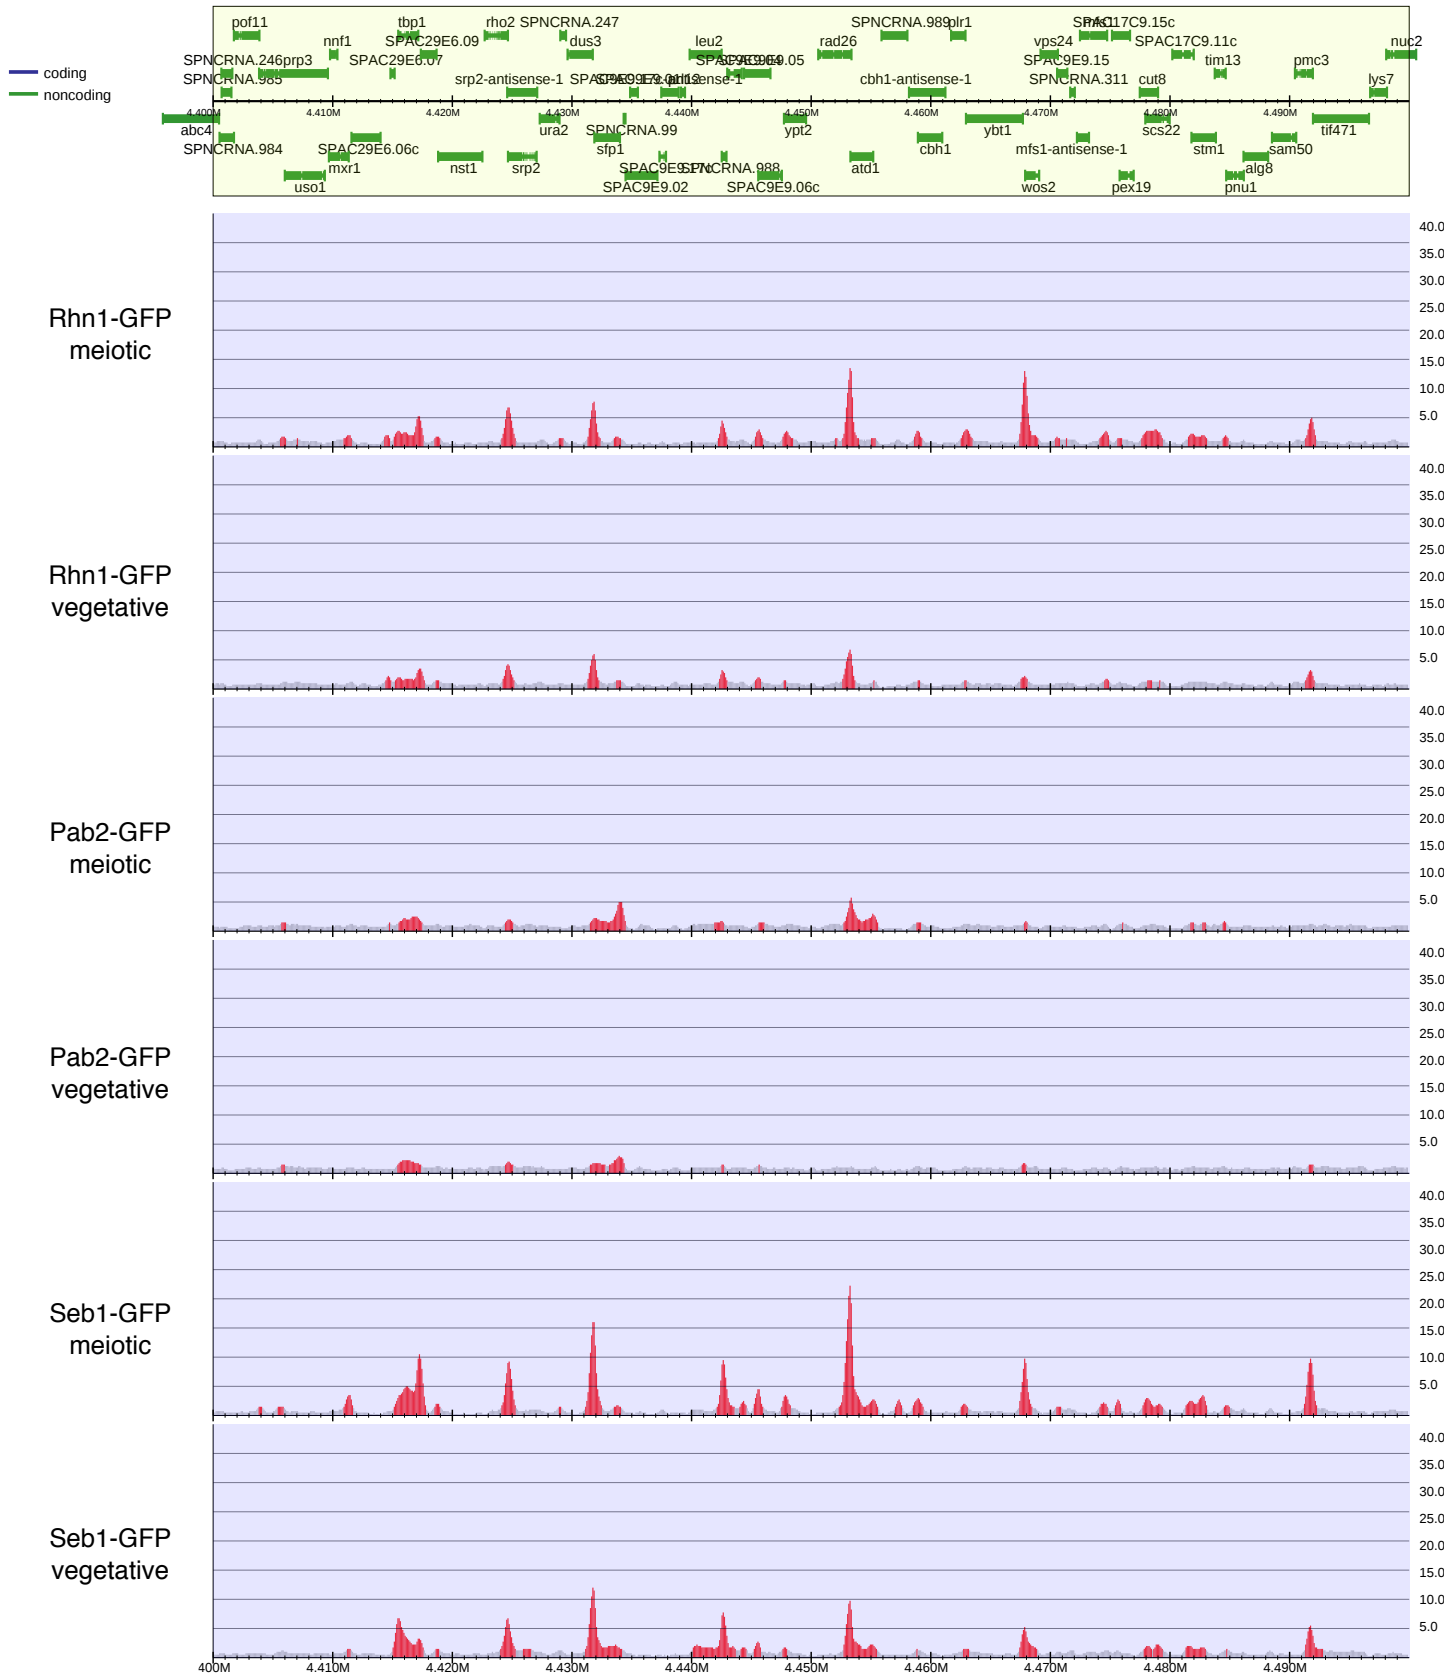







I\_1\_49

— coding  
— noncoding

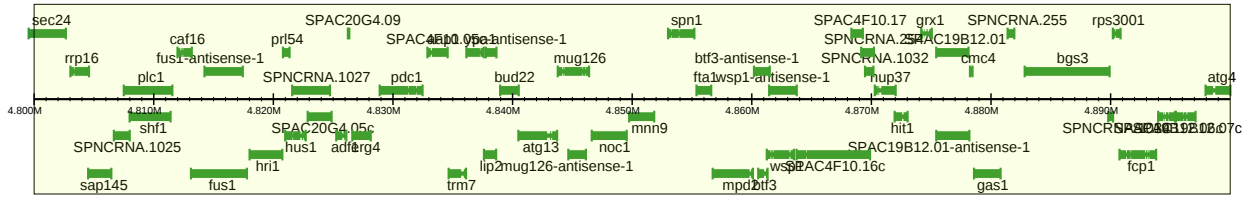

Rhn1-GFP  
meiotic

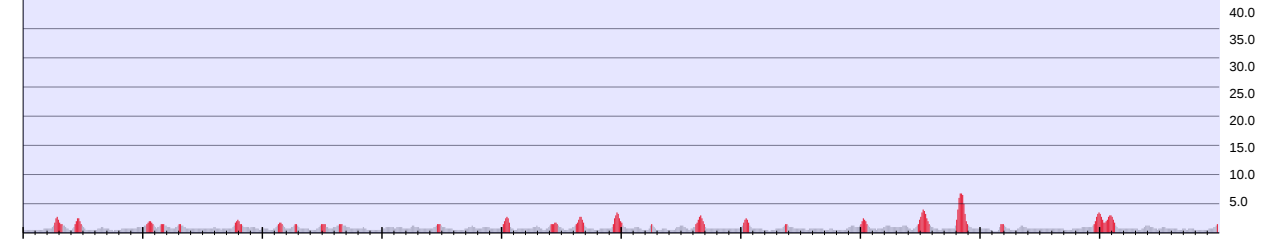

Rhn1-GFP  
vegetative

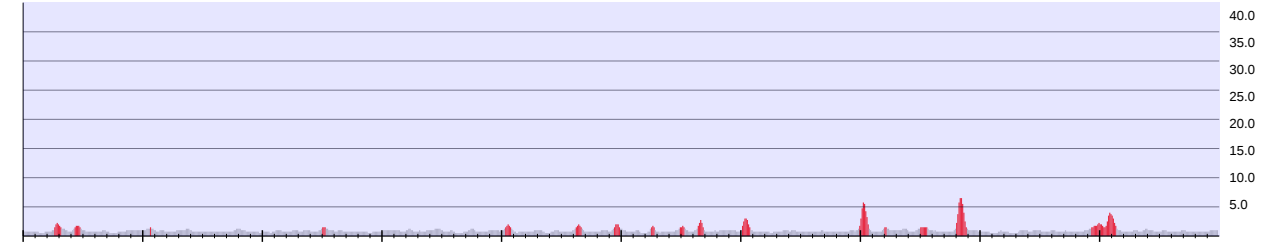

Pab2-GFP  
meiotic

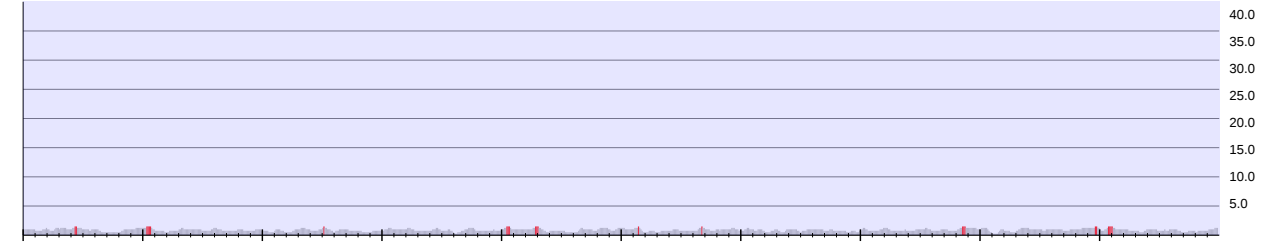

Pab2-GFP  
vegetative

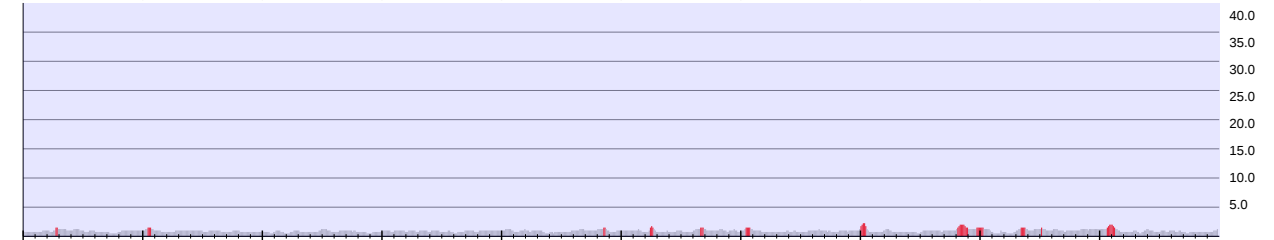

Seb1-GFP  
meiotic

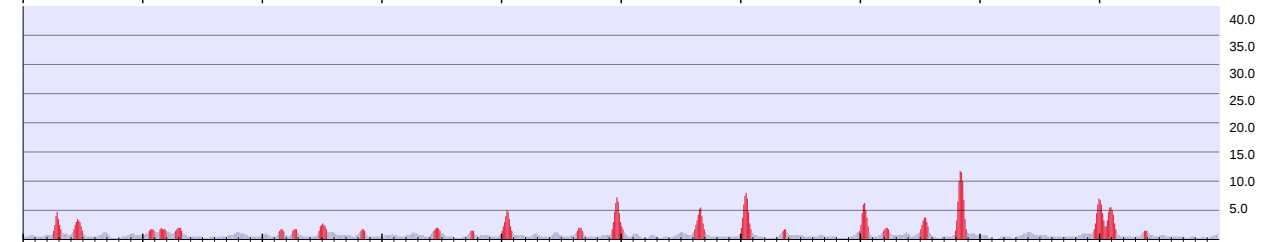

Seb1-GFP  
vegetative

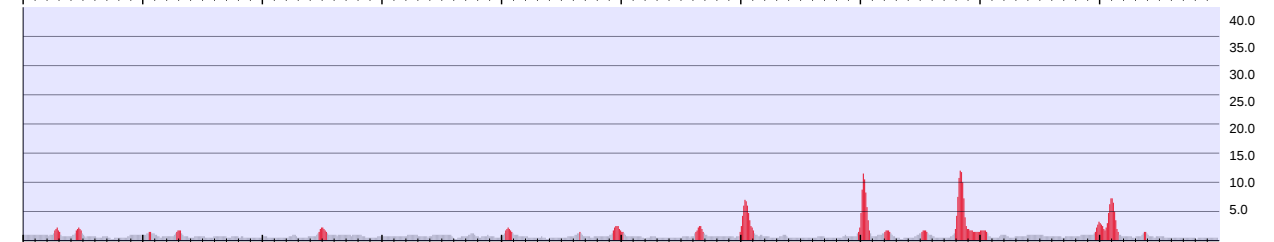

800M 4.810M 4.820M 4.830M 4.840M 4.850M 4.860M 4.870M 4.880M 4.890M

I\_1\_50

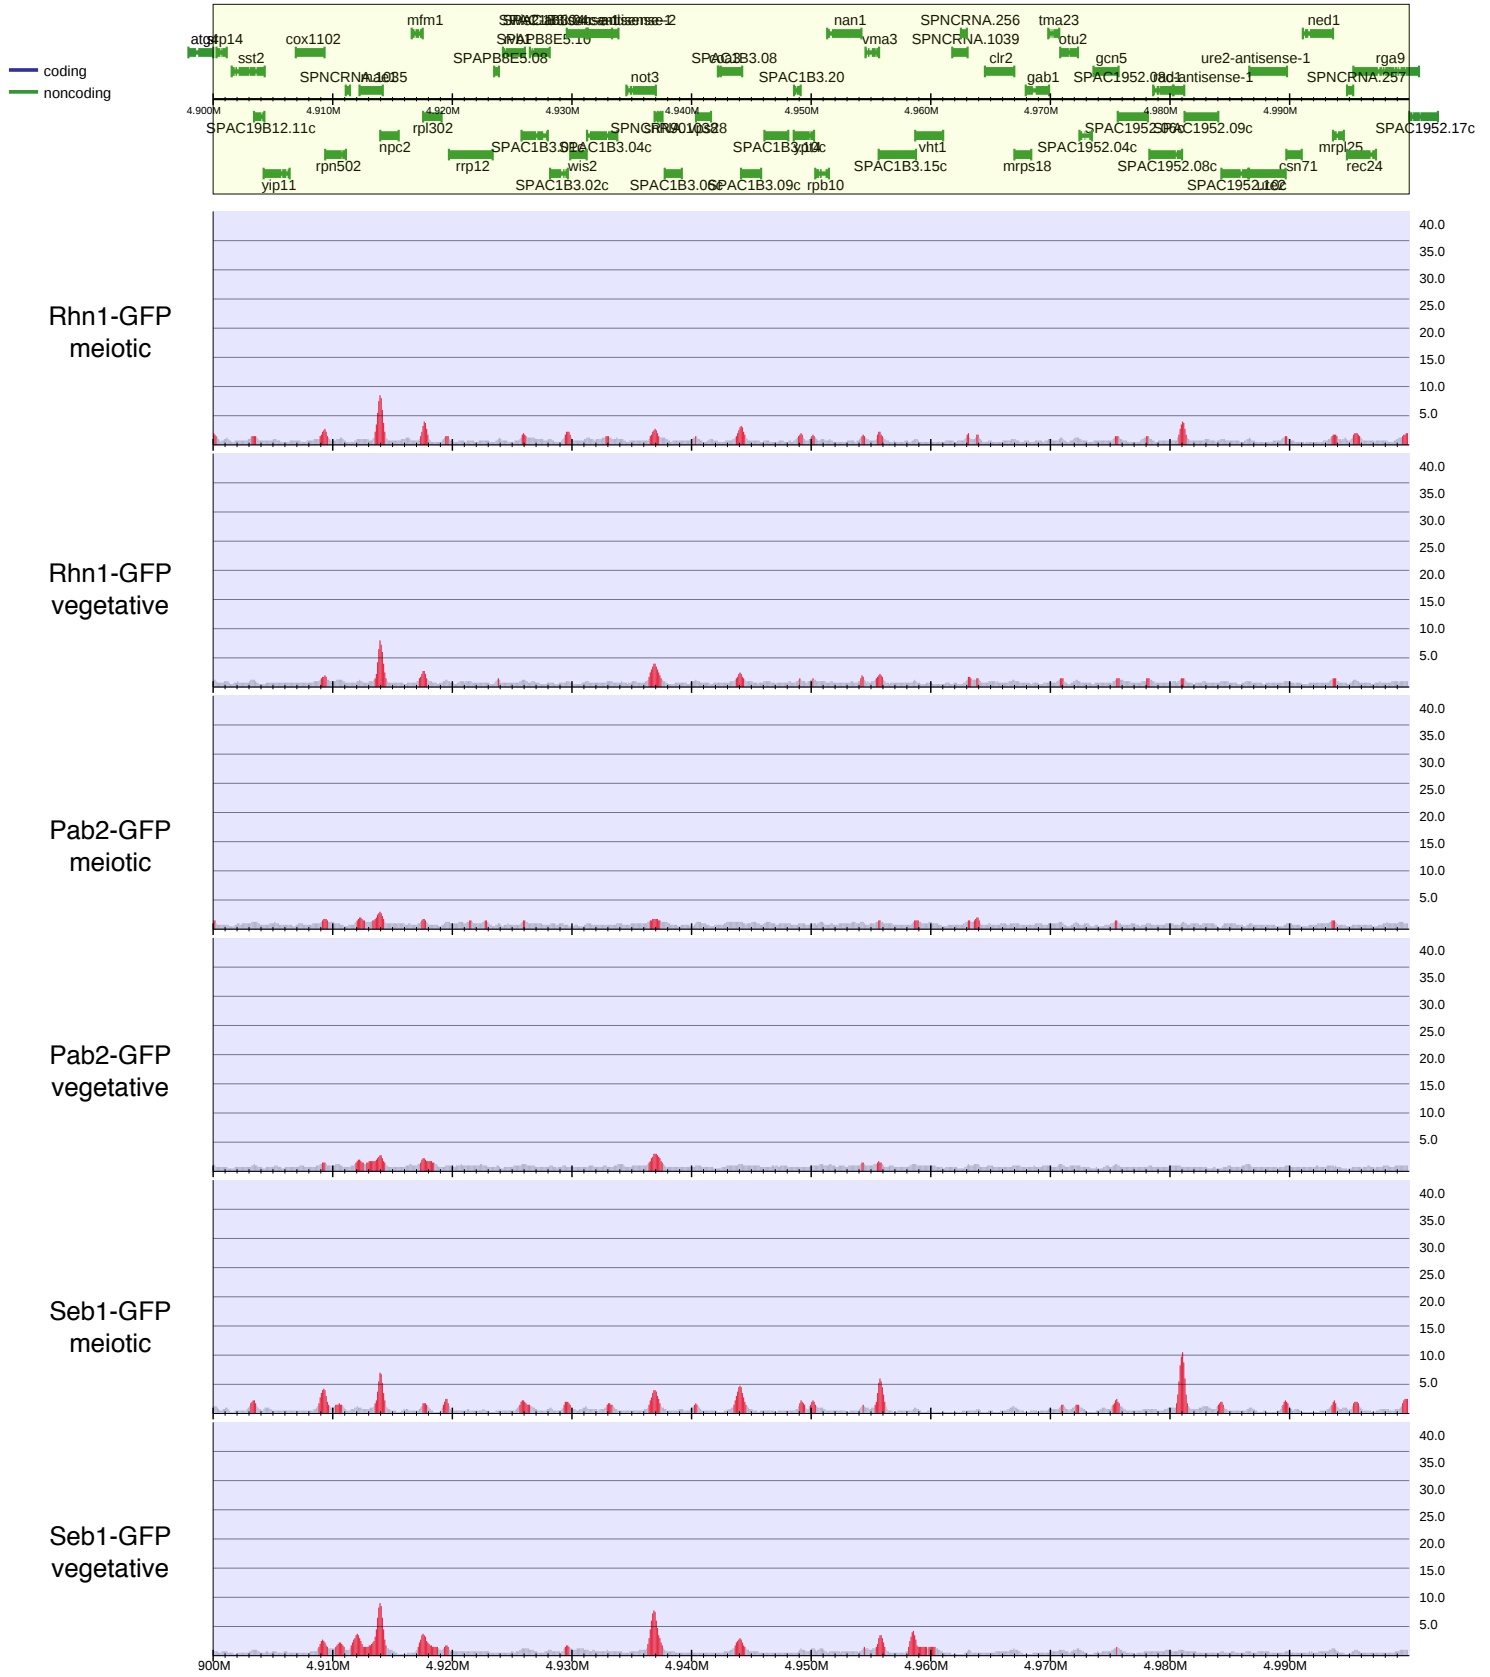

I\_1\_51

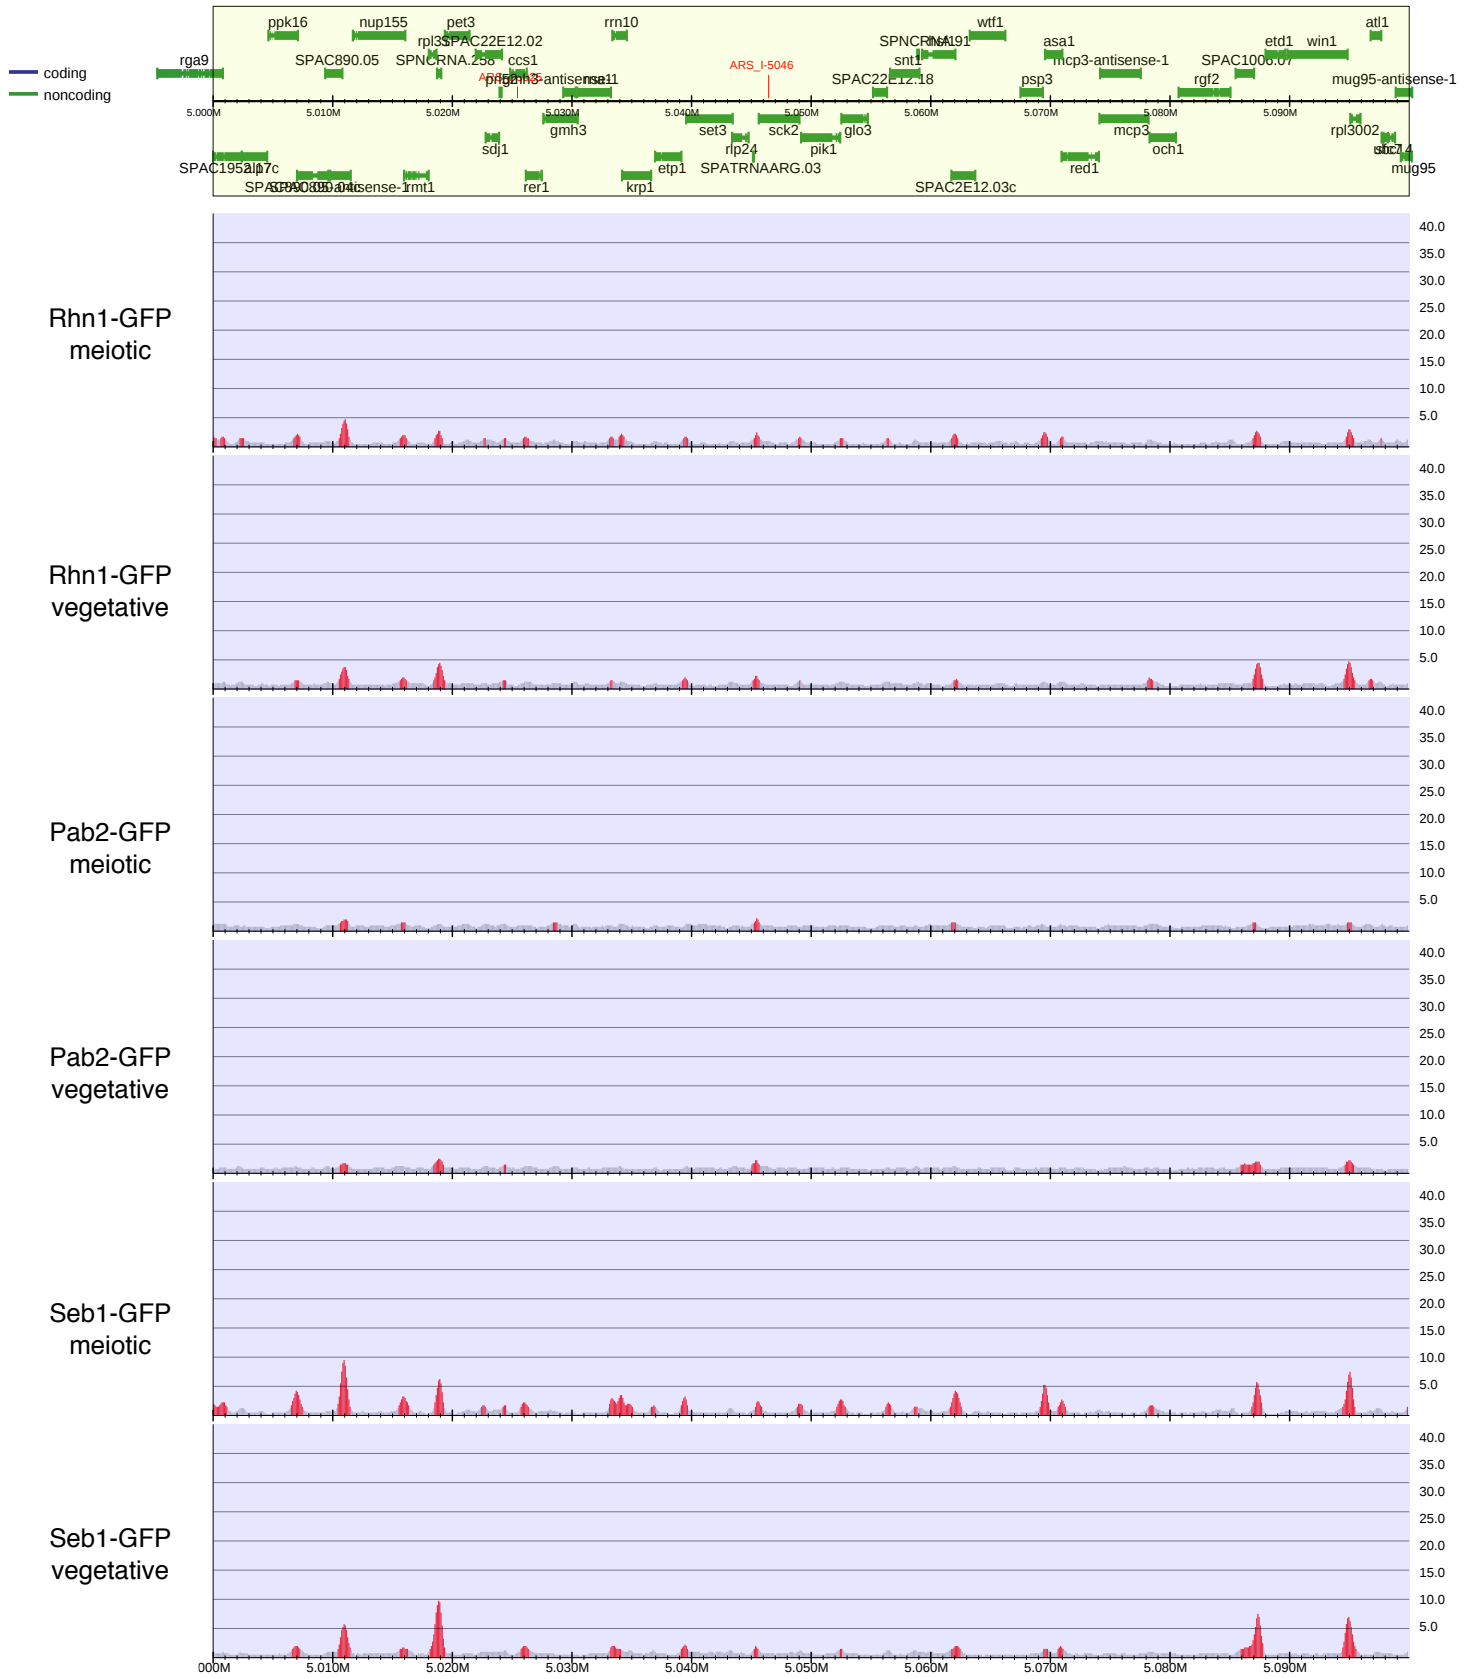

I\_1\_52

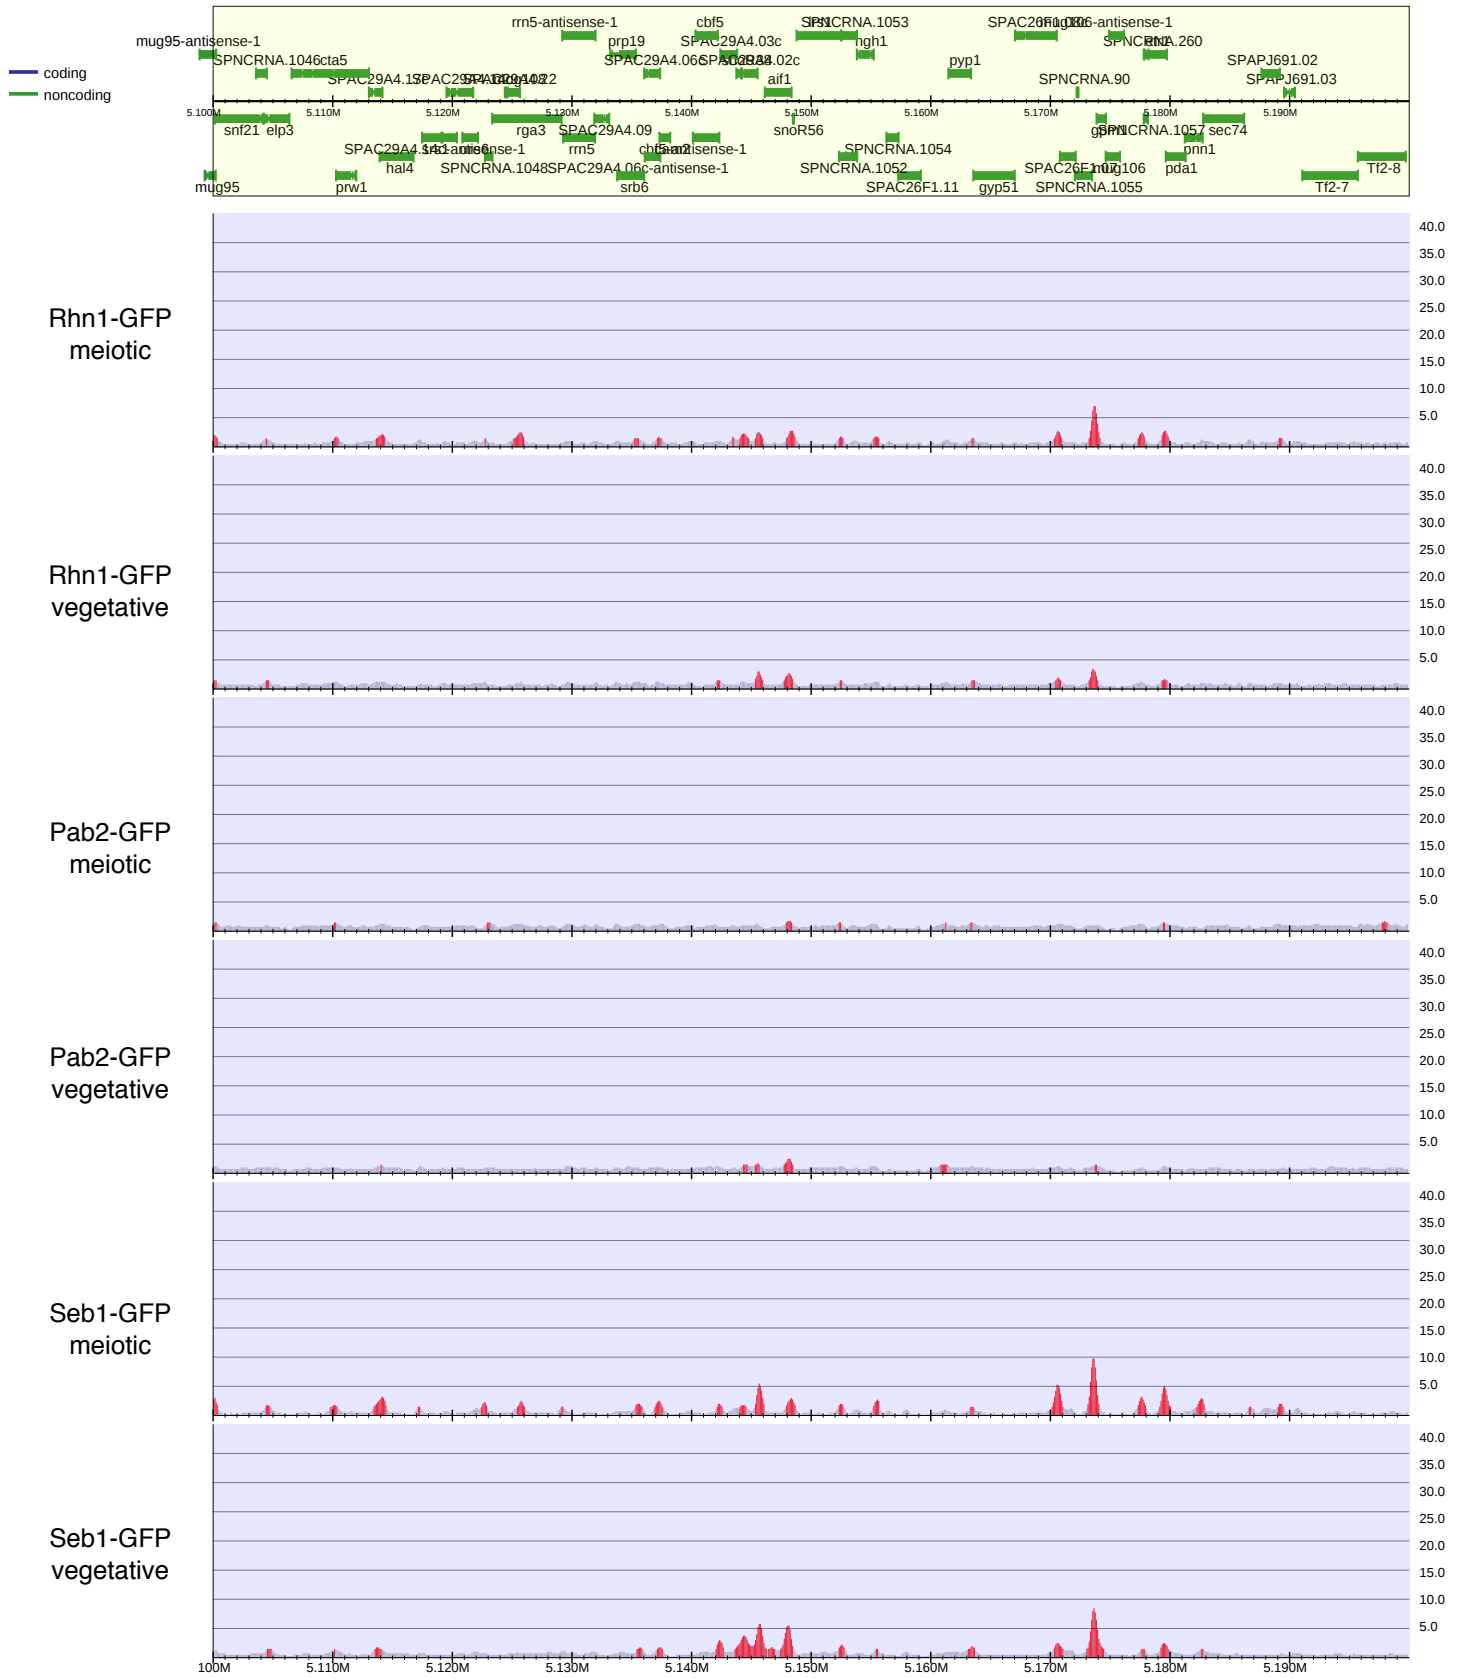



I\_1\_53

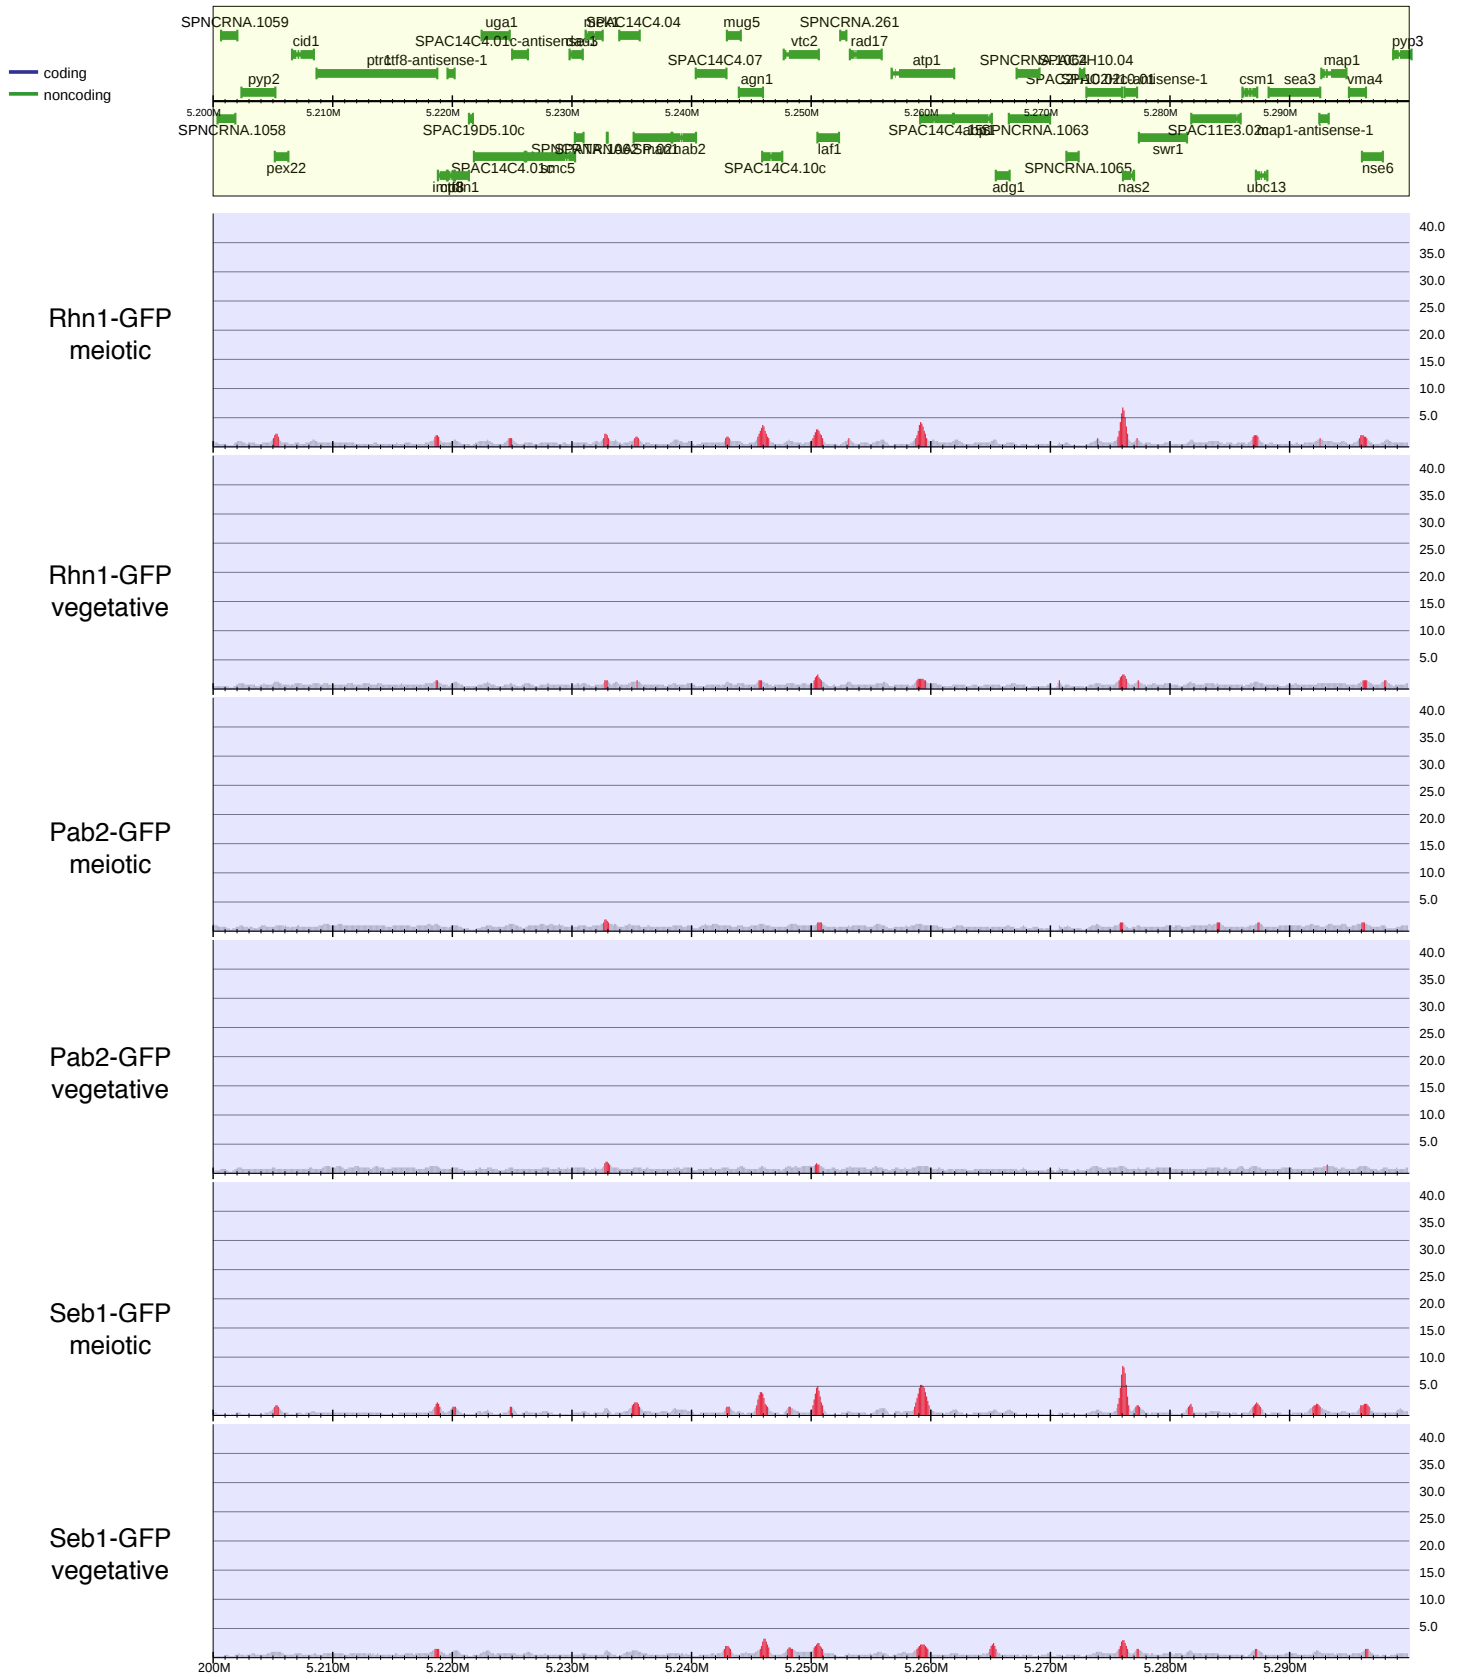





I\_1\_56

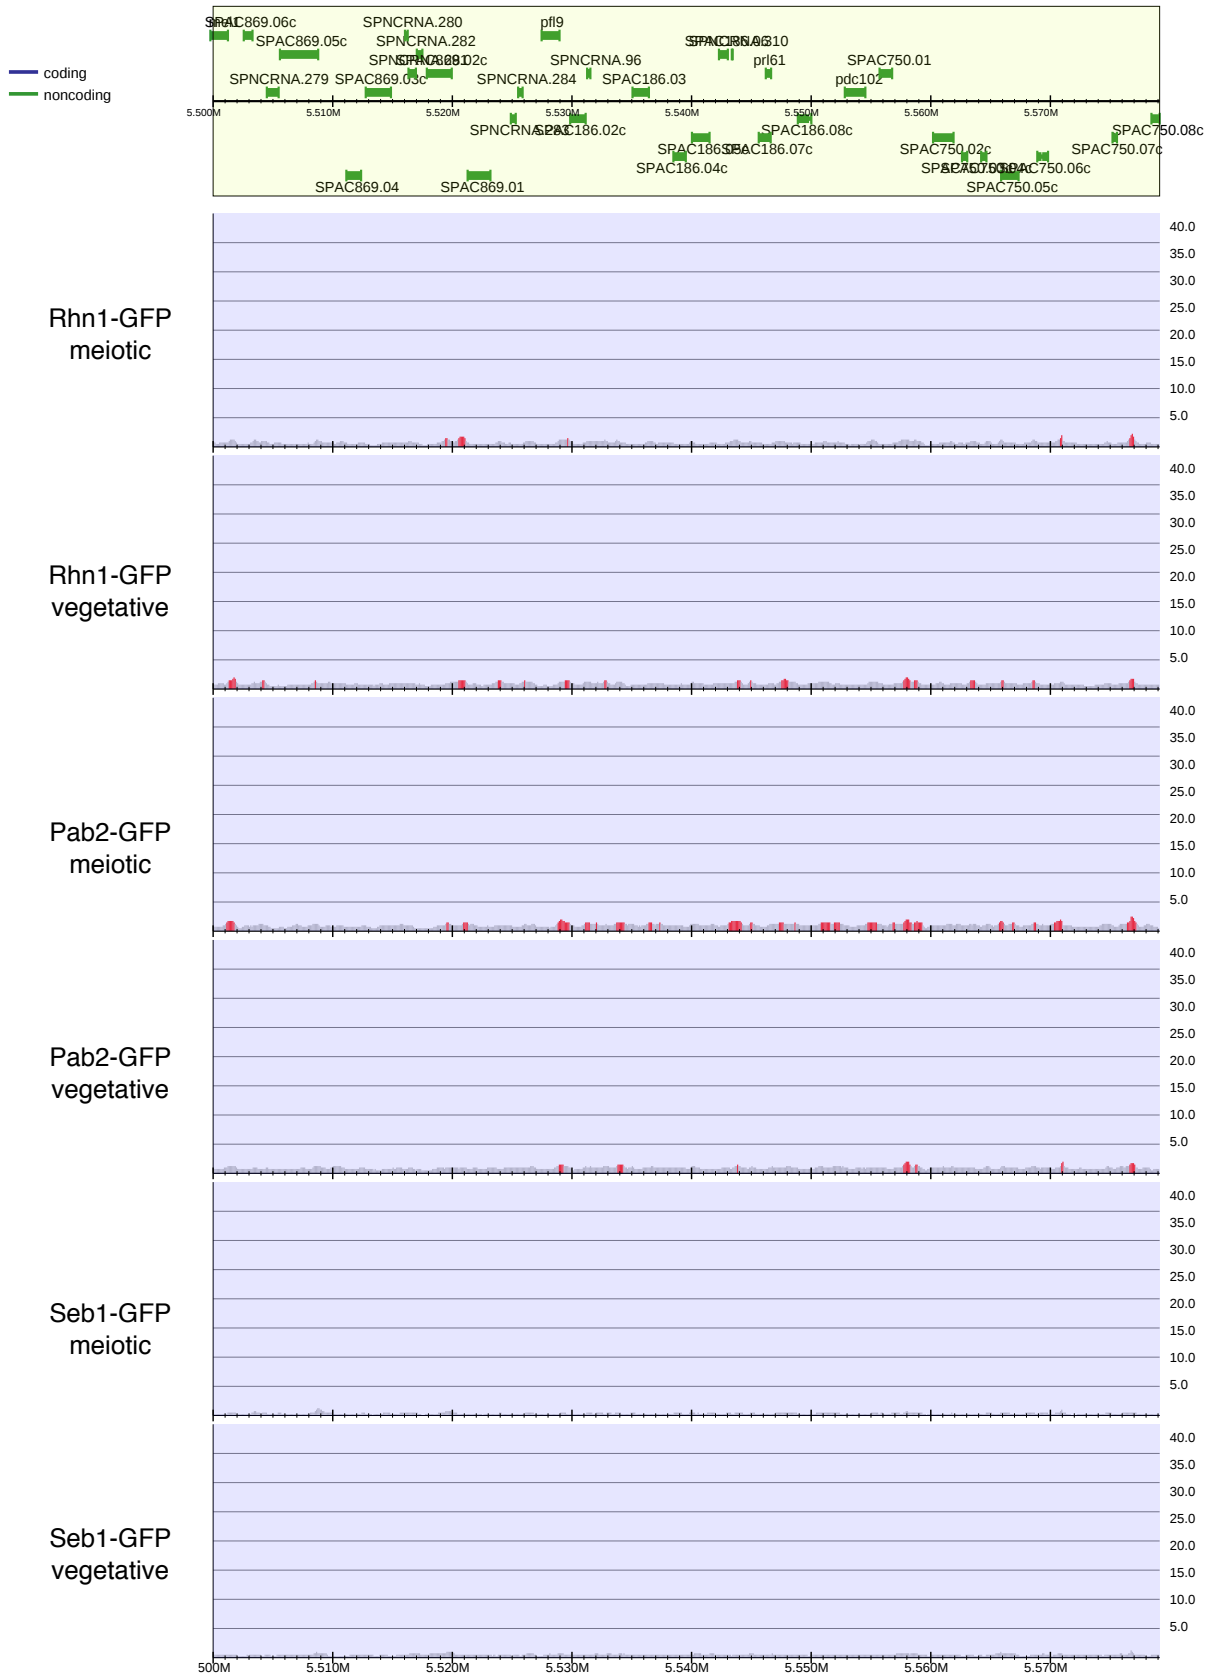





II\_1\_3

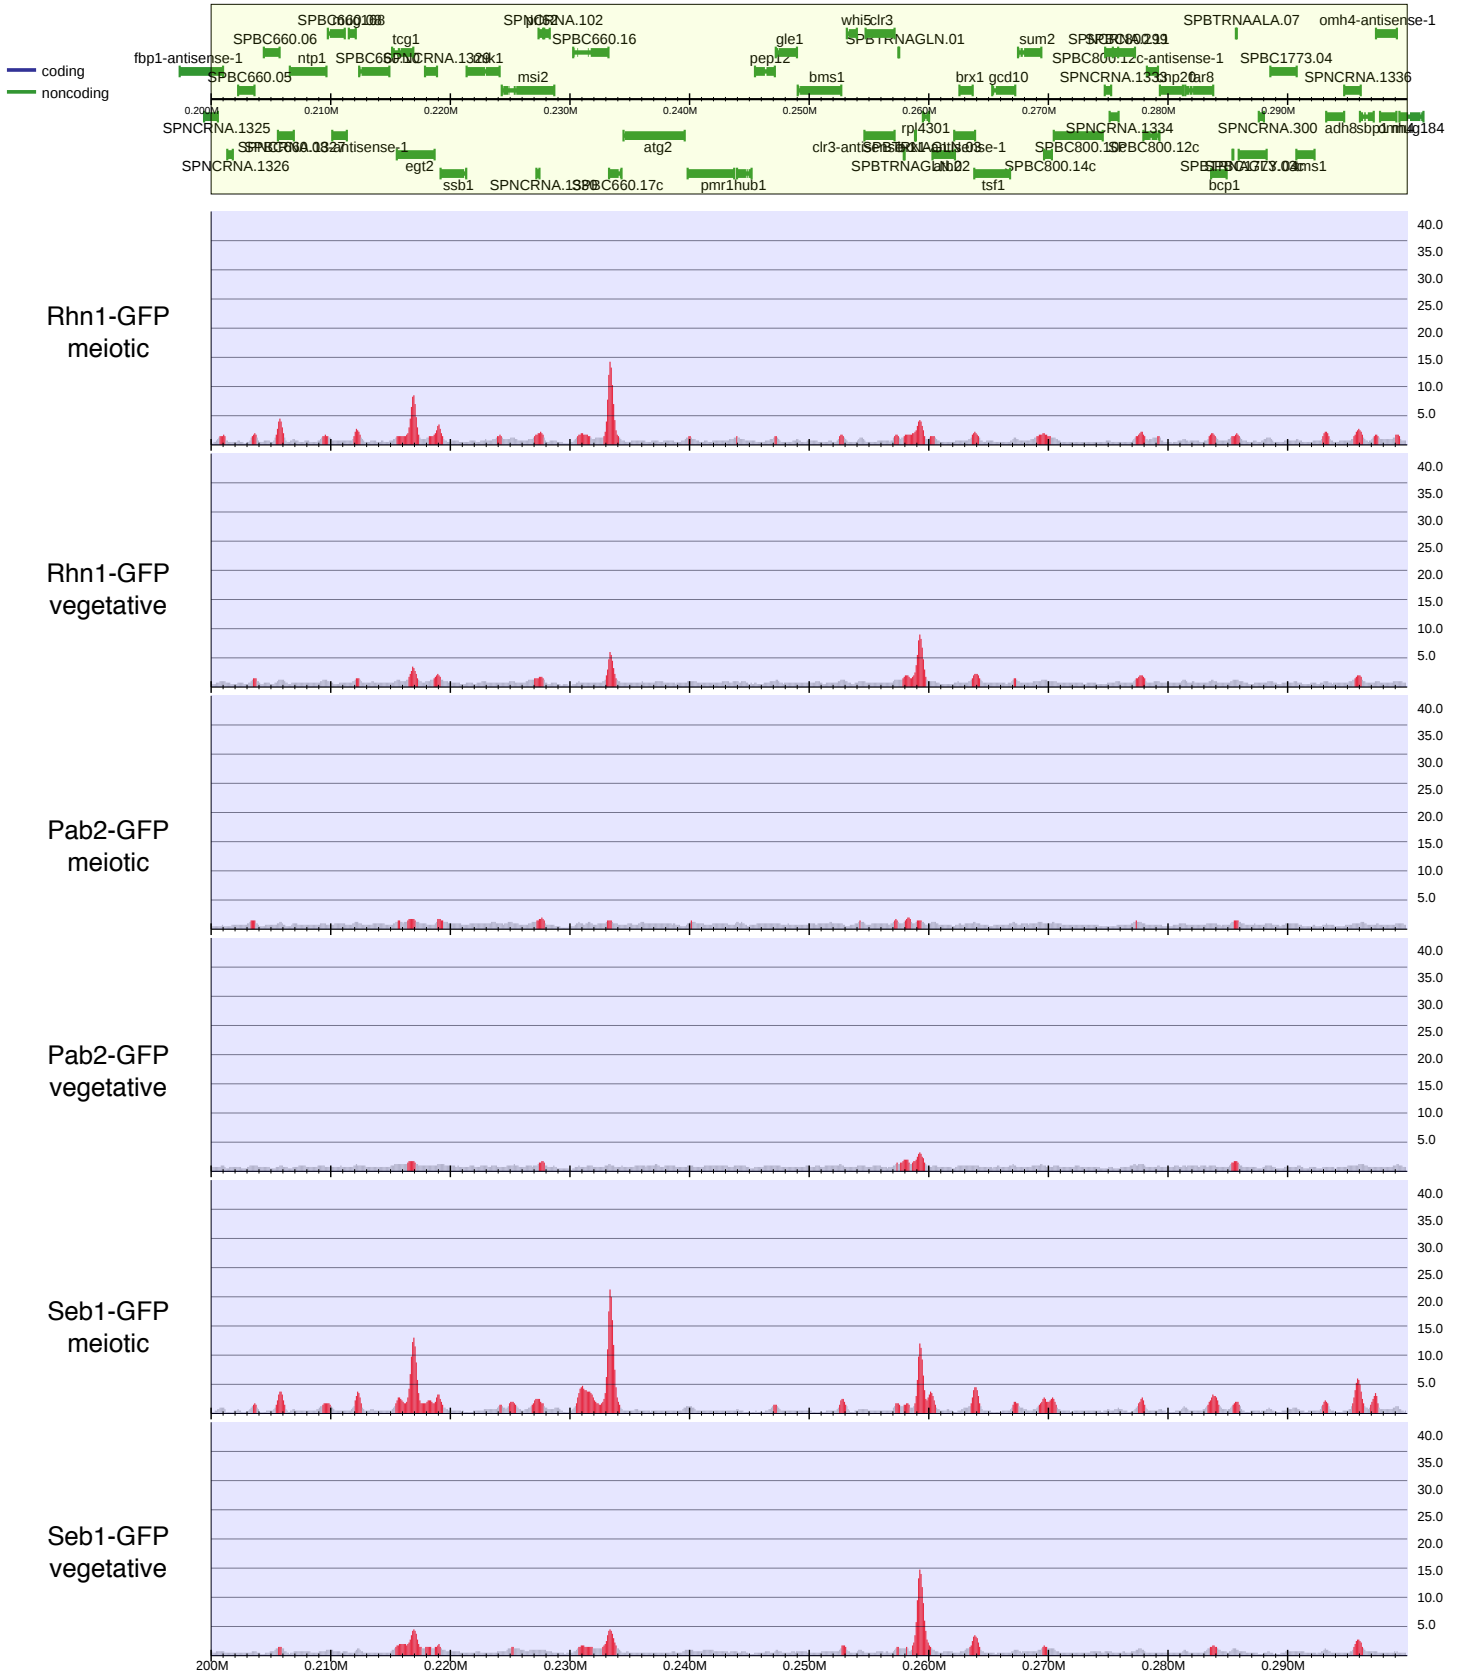









II\_1\_7

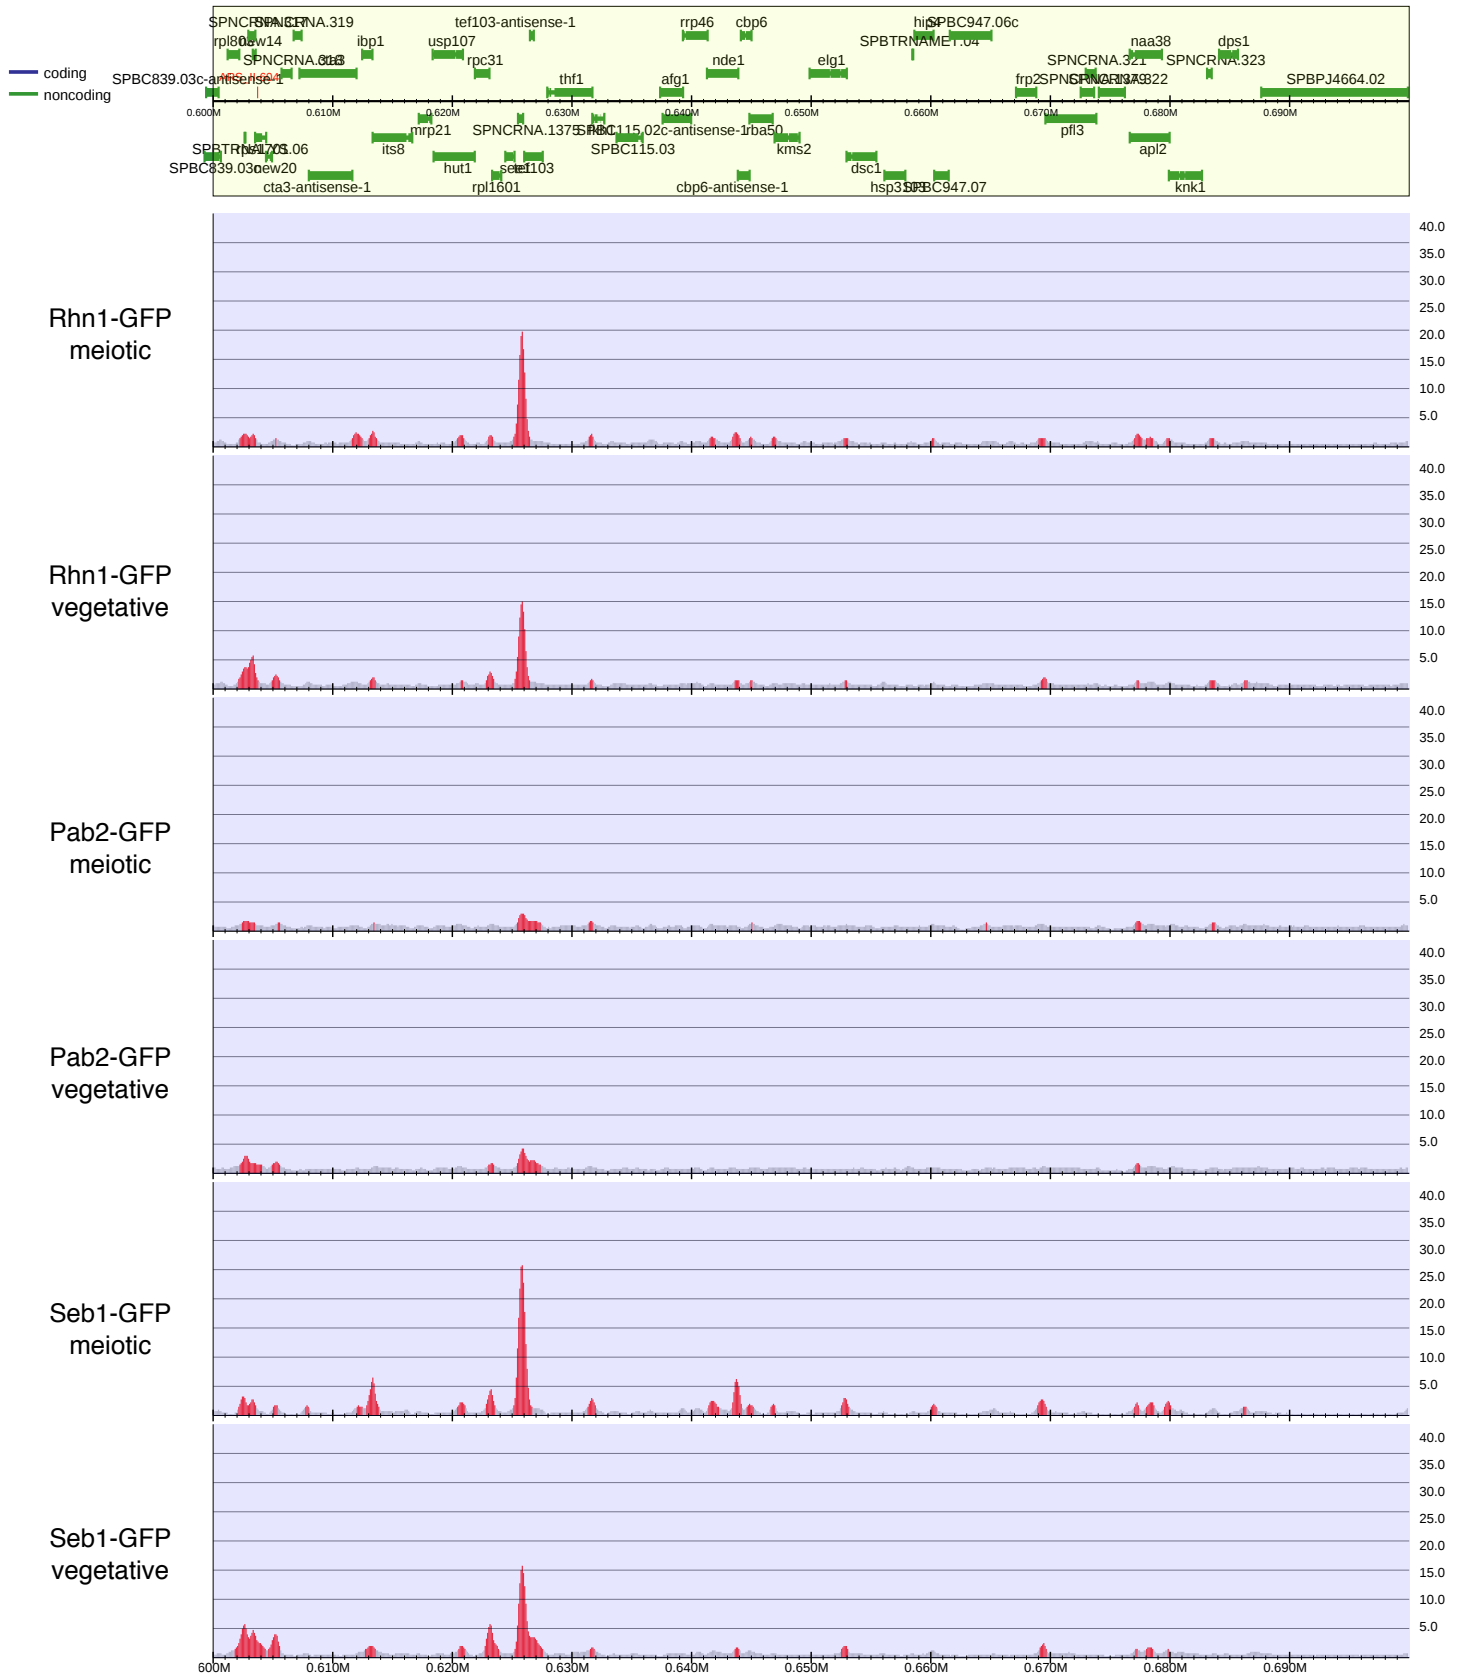

II\_1\_8

coding  
noncoding

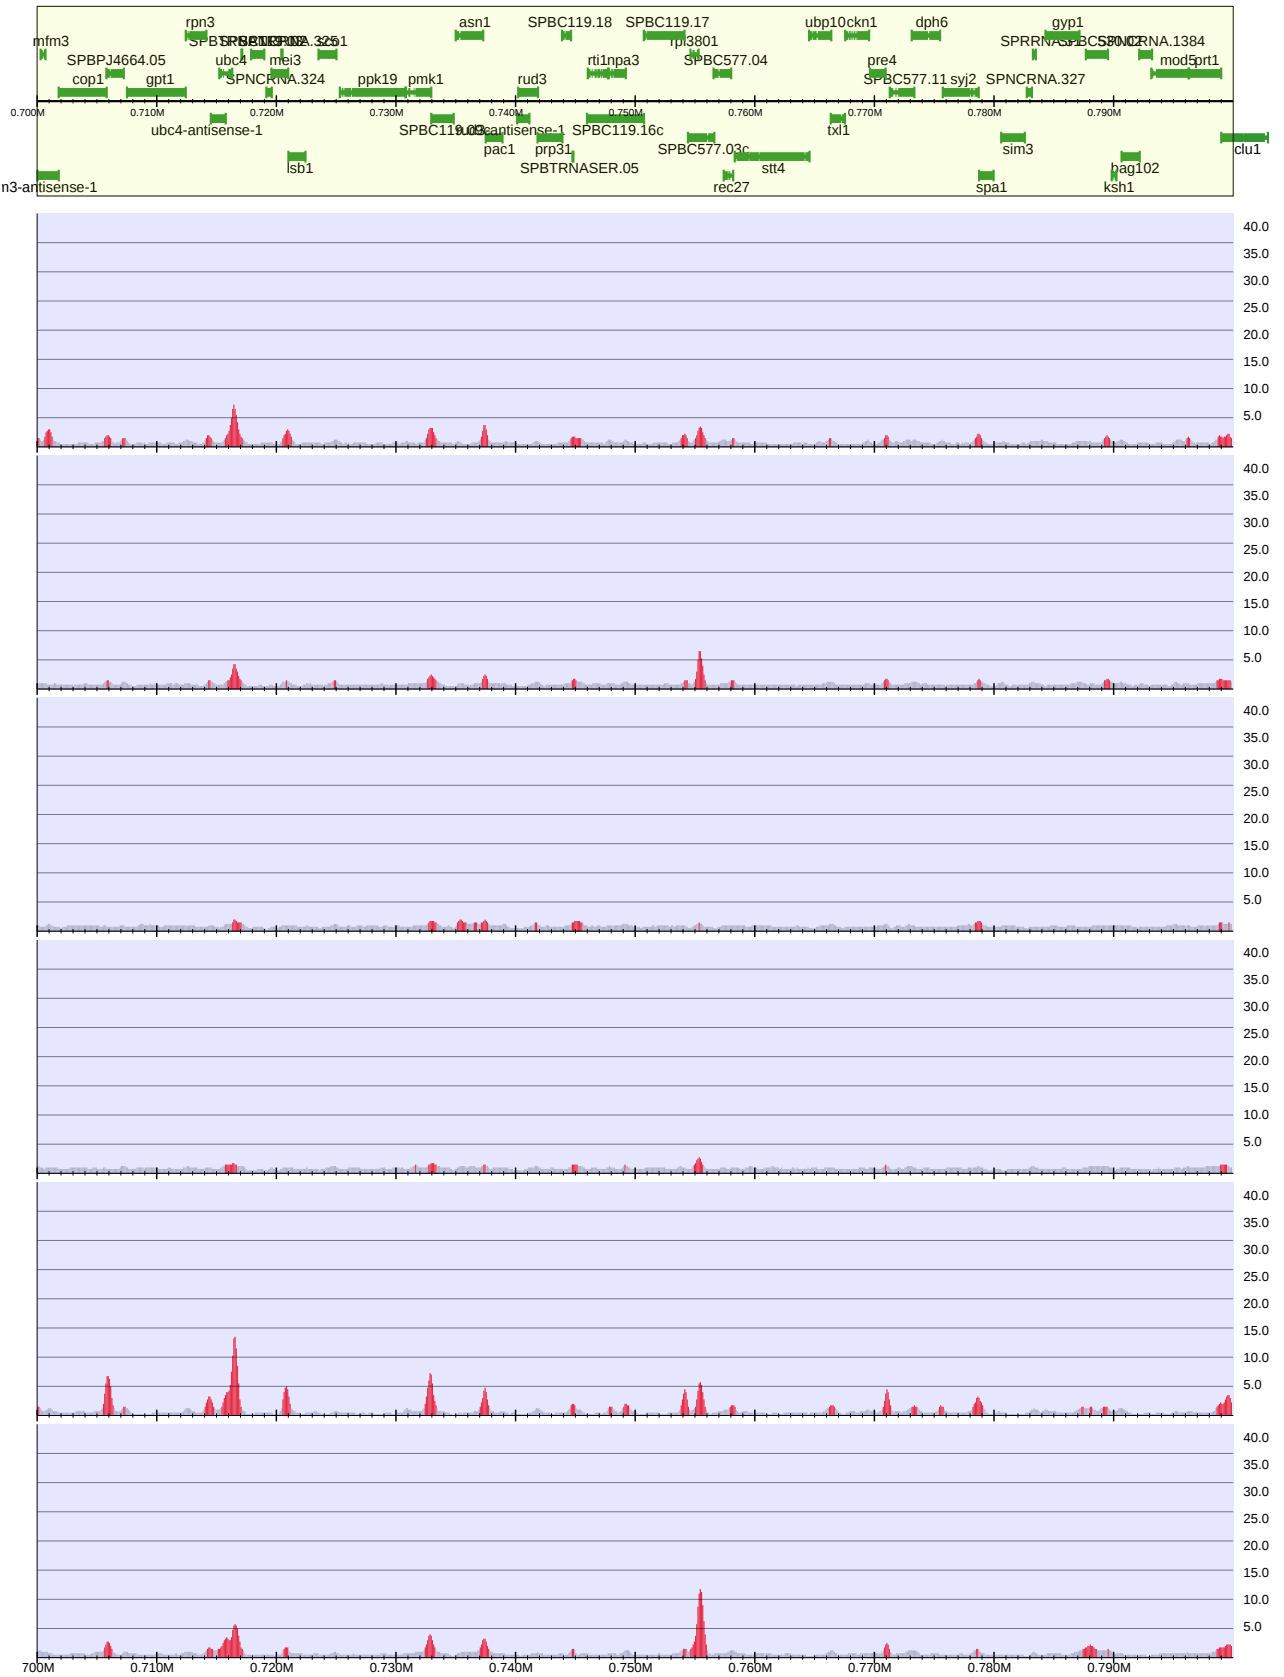

II\_1\_9

coding  
noncoding

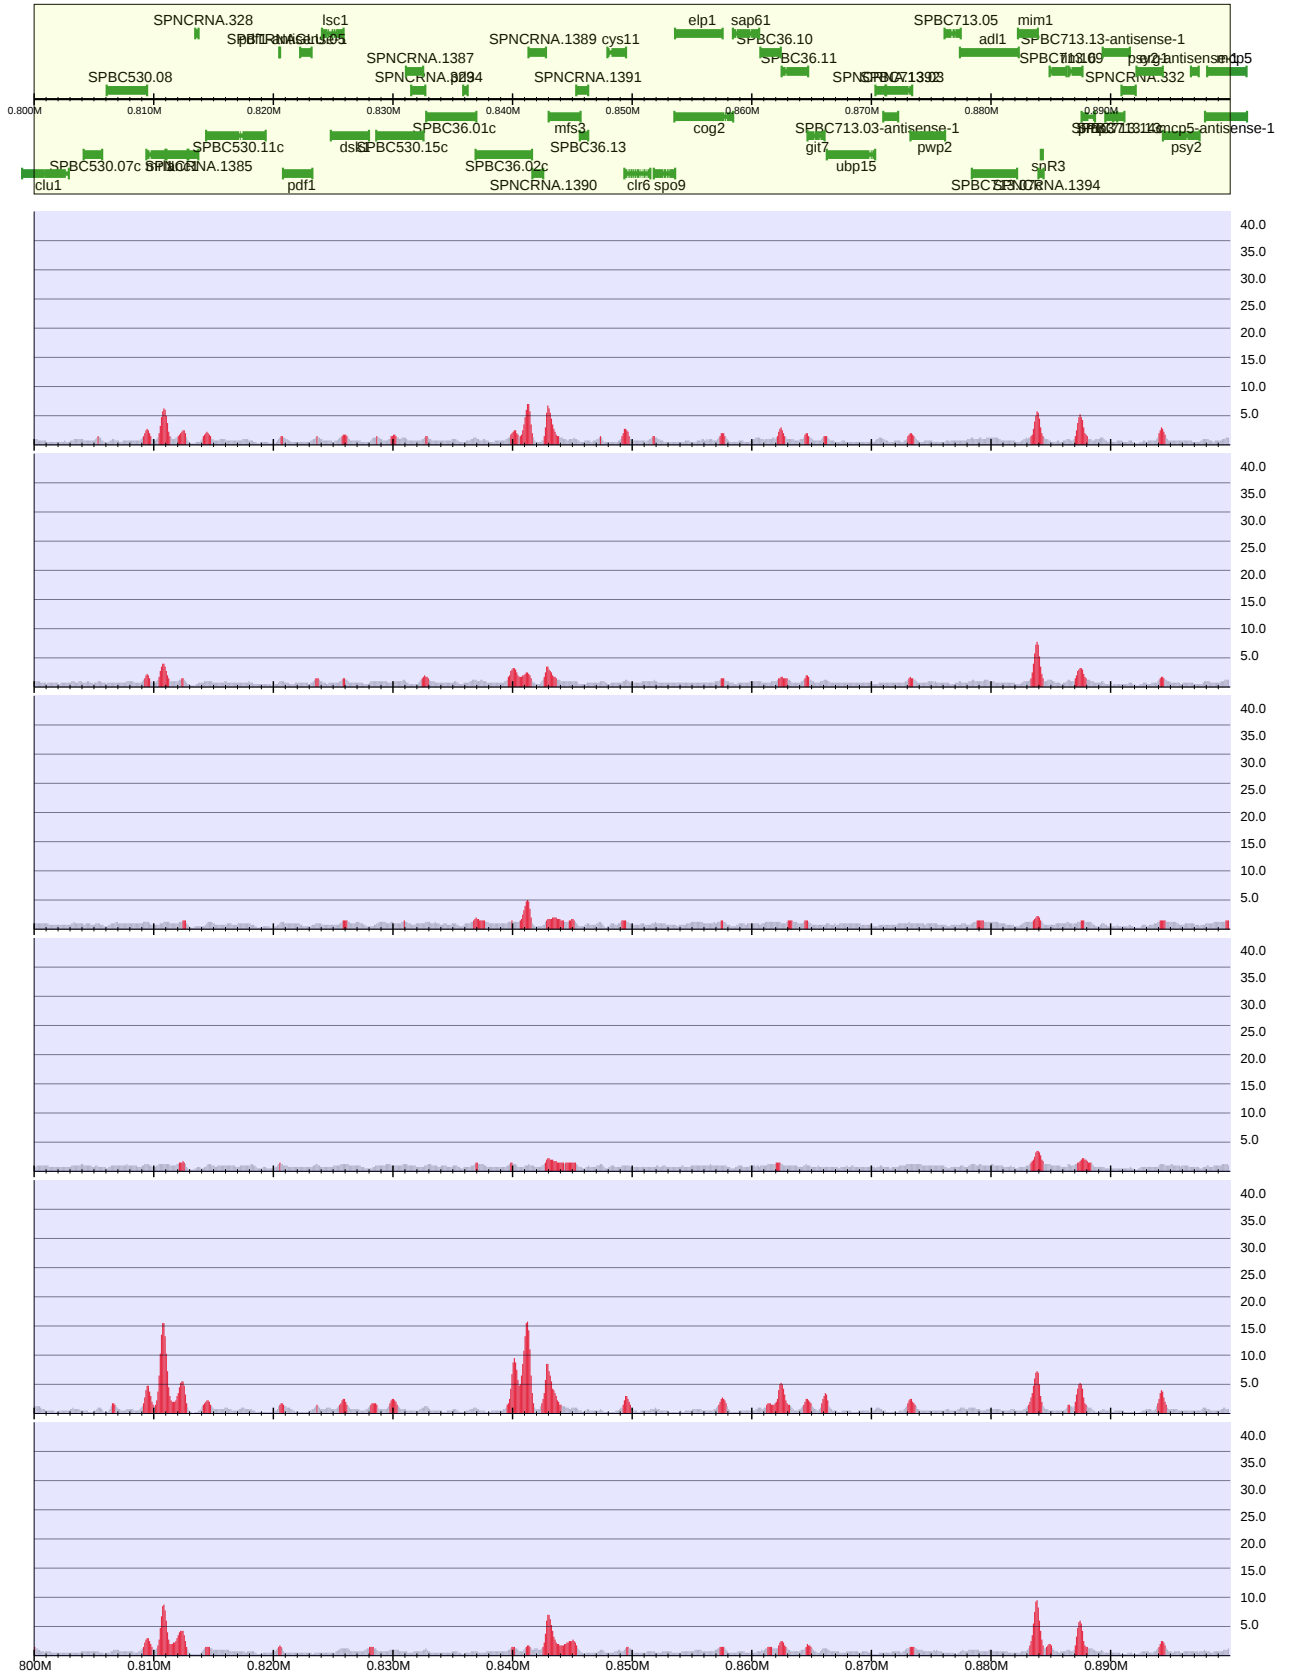

II\_1\_10

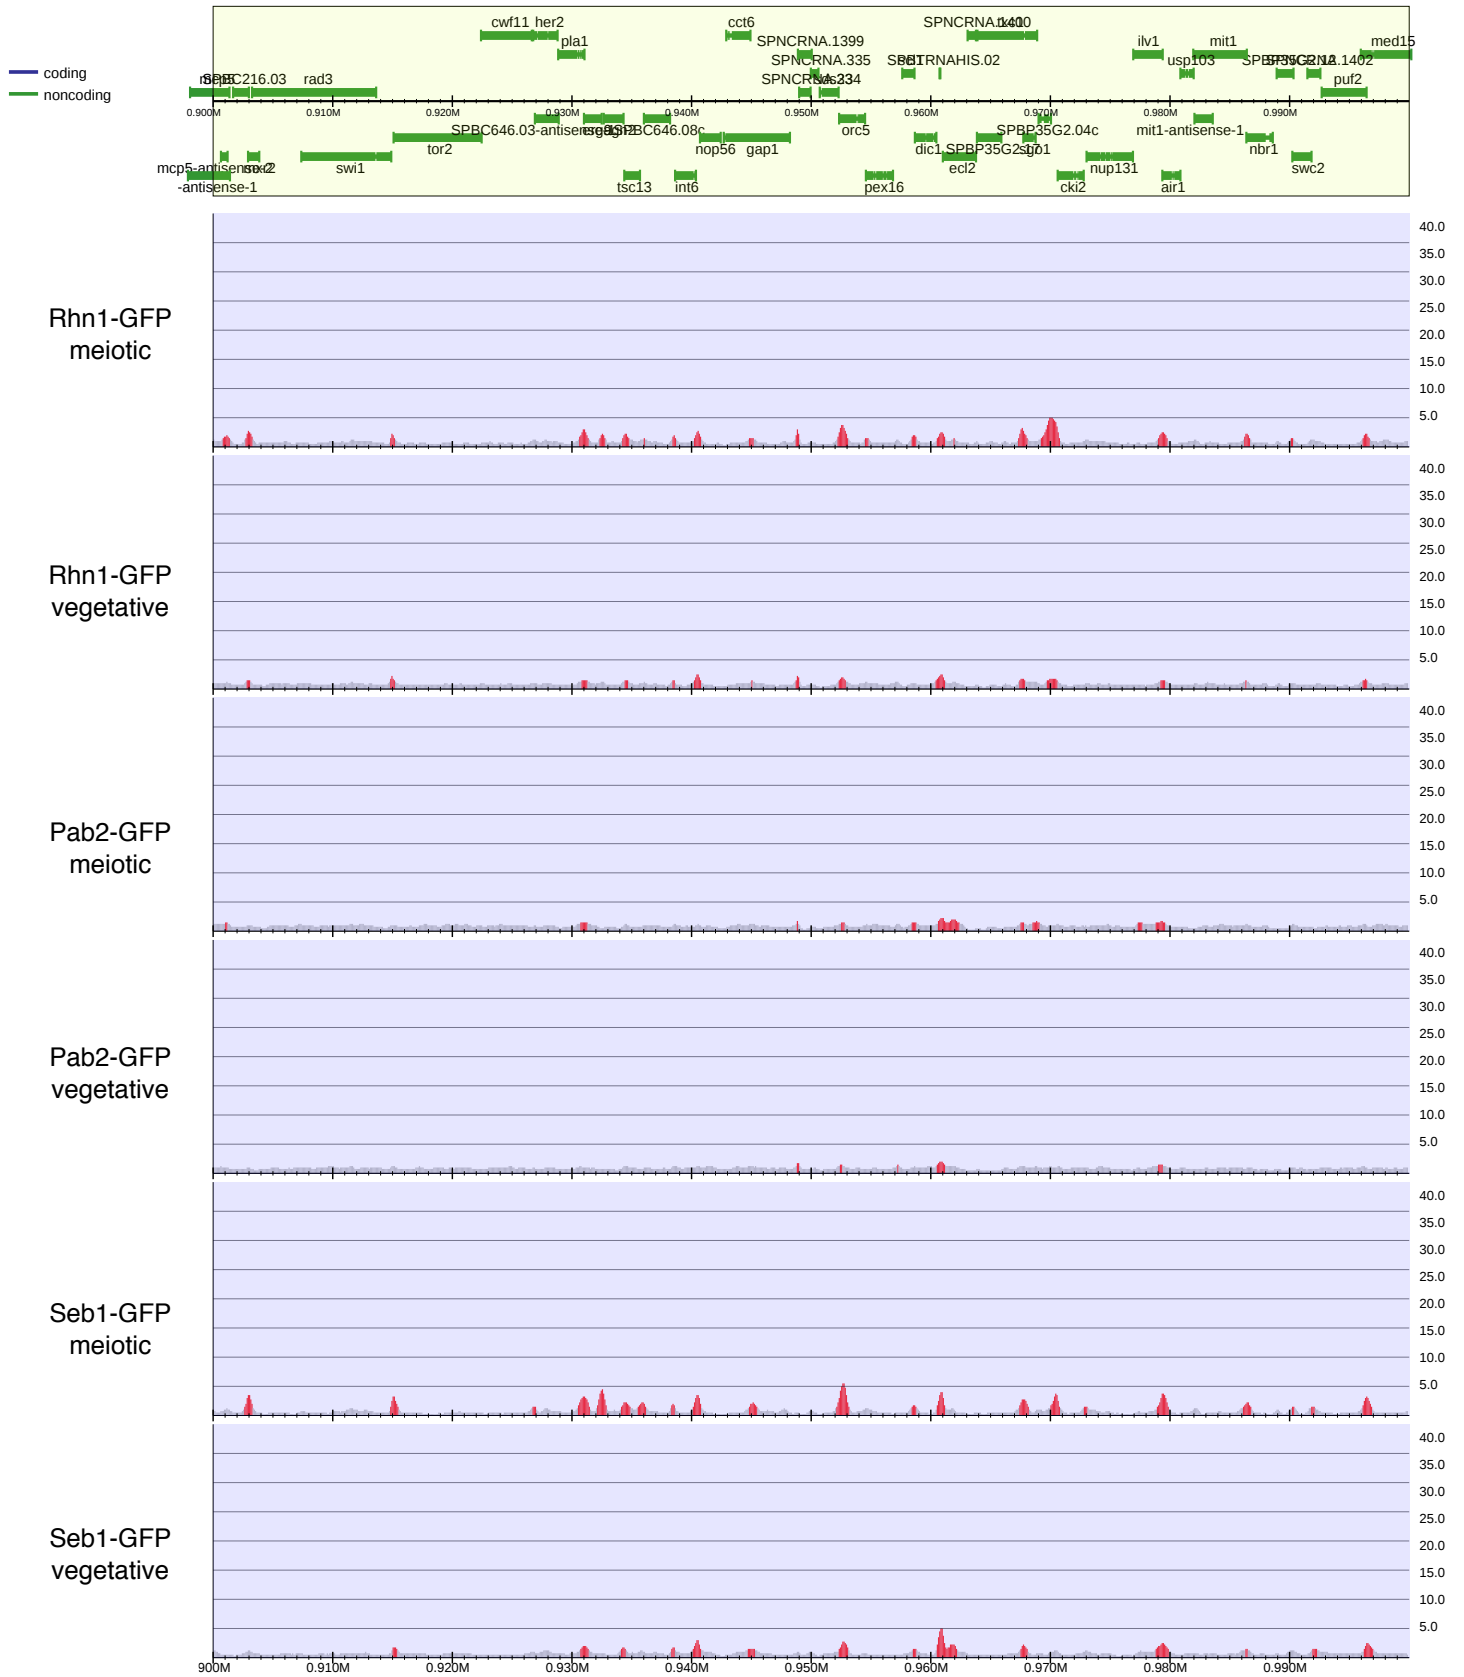

II\_1\_11

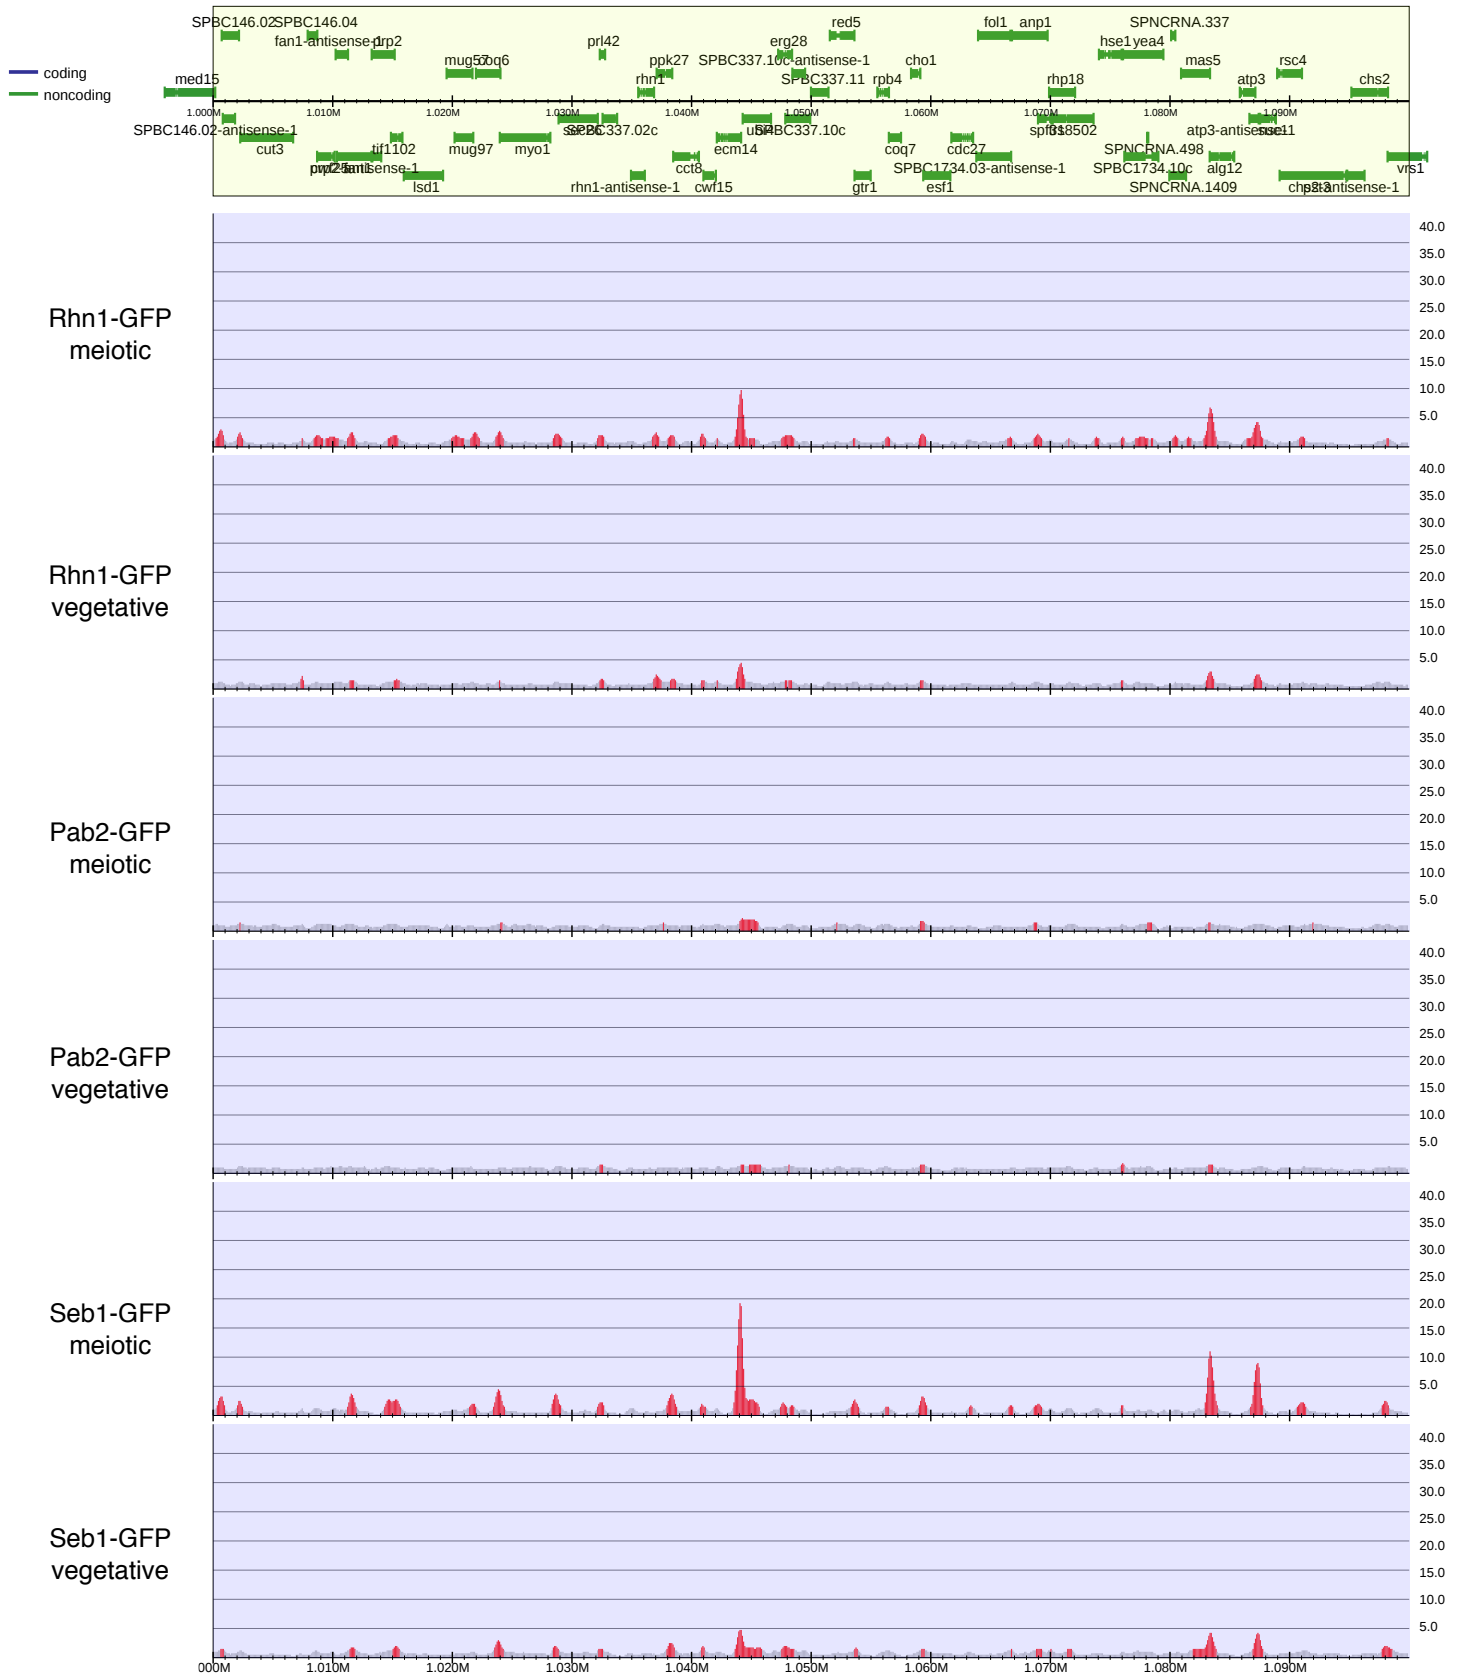

II\_1\_12

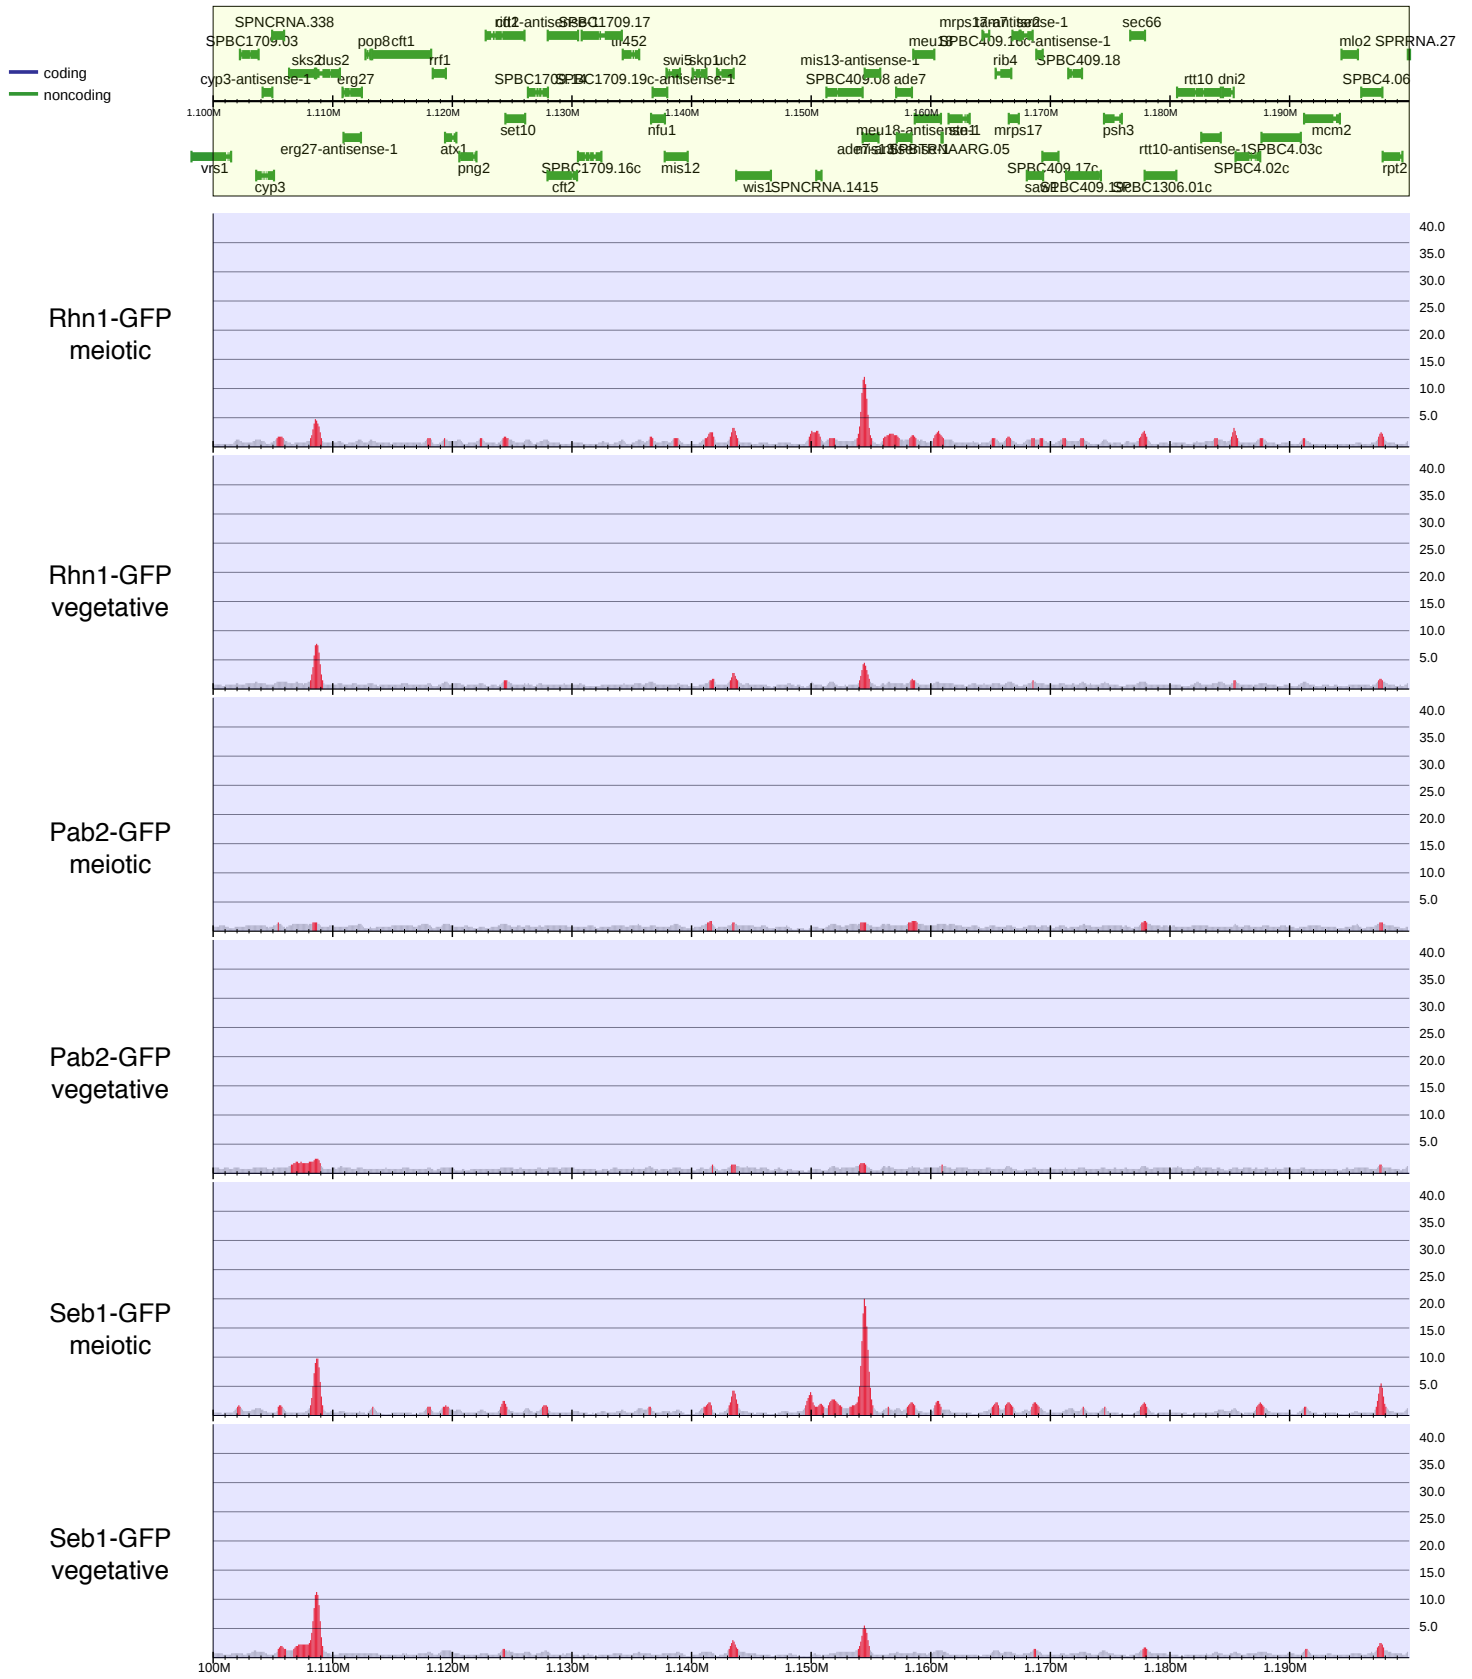



II\_1\_13

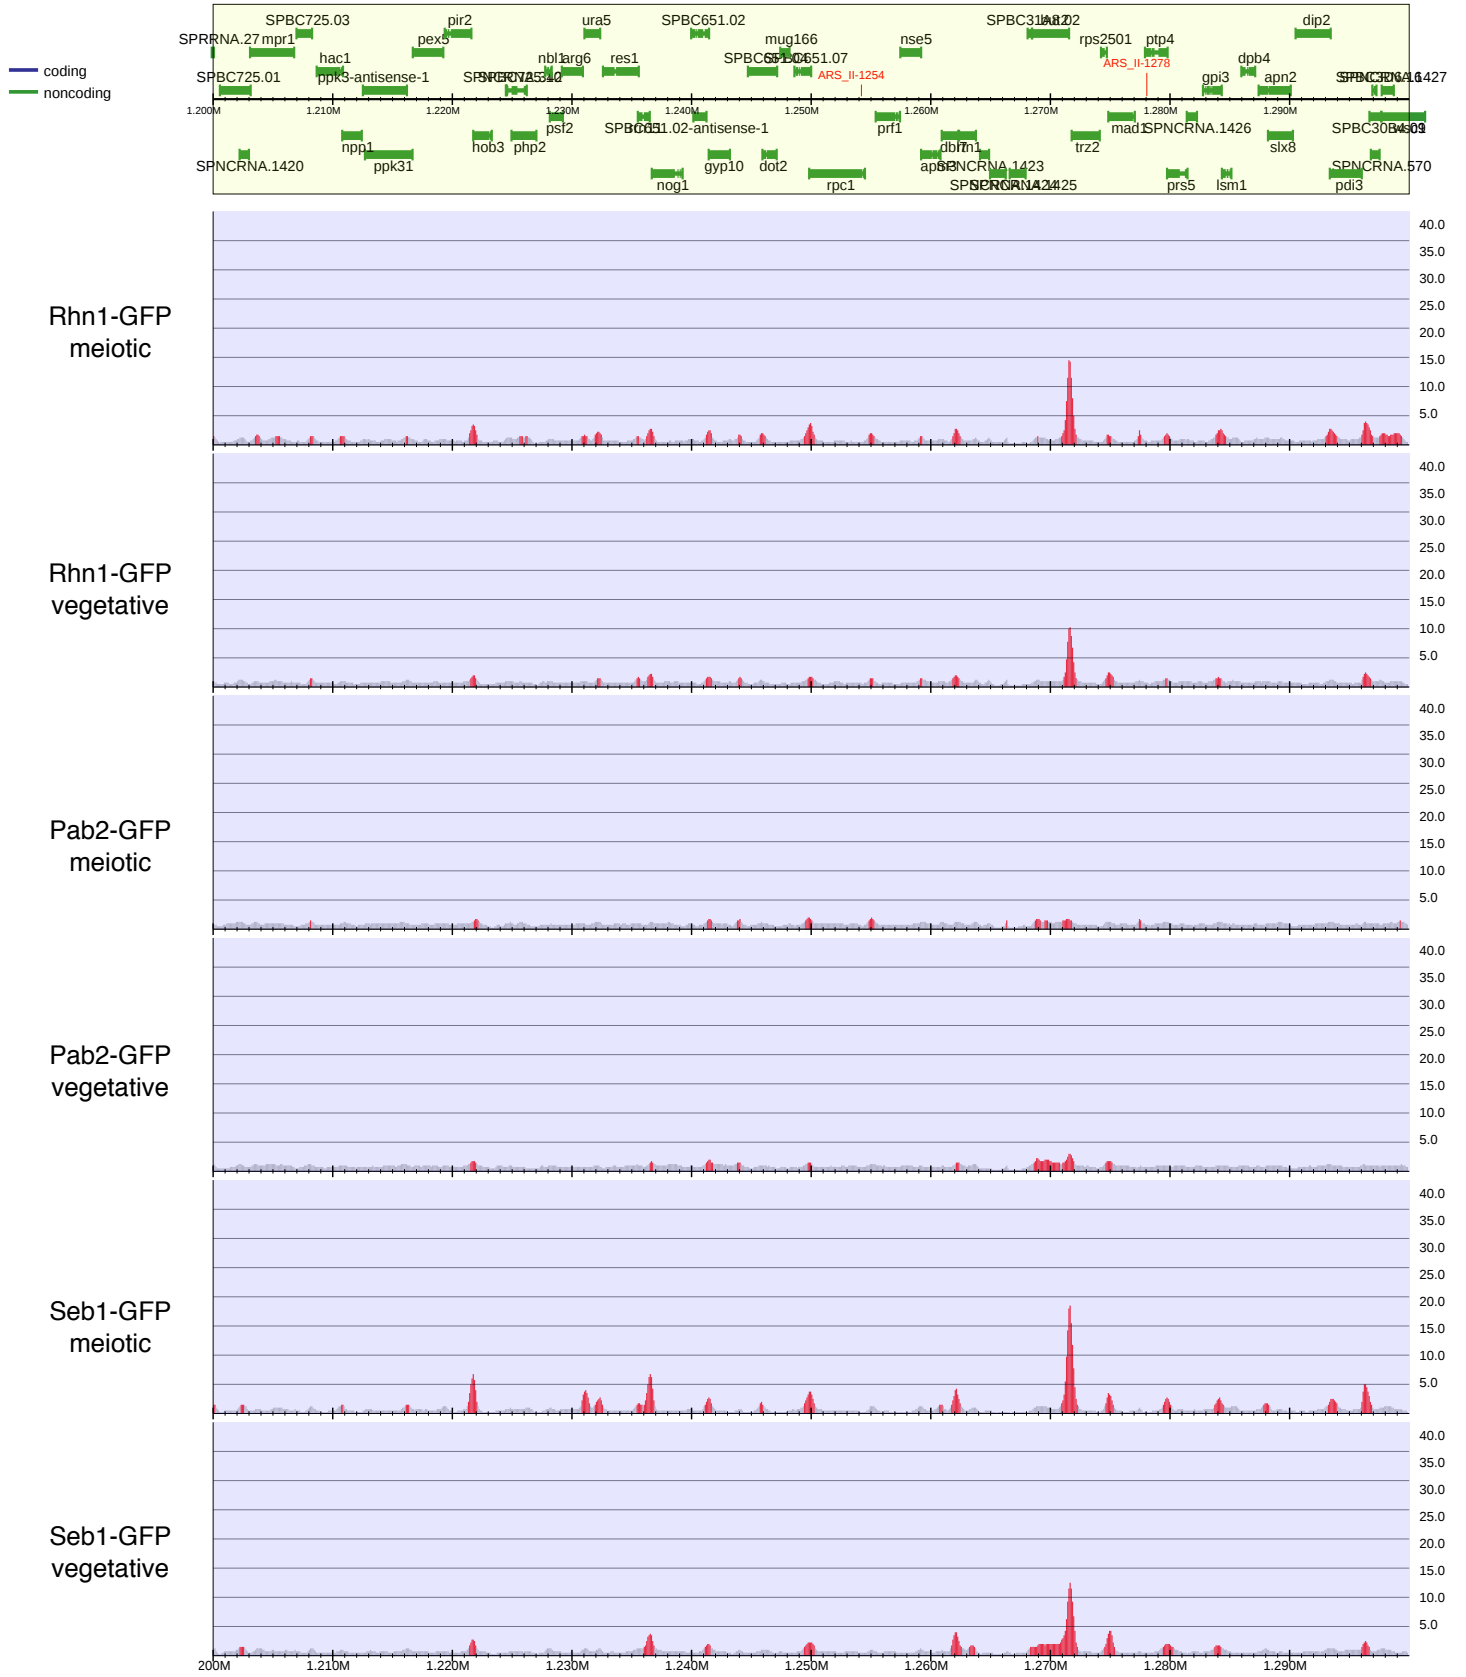

II\_1\_14

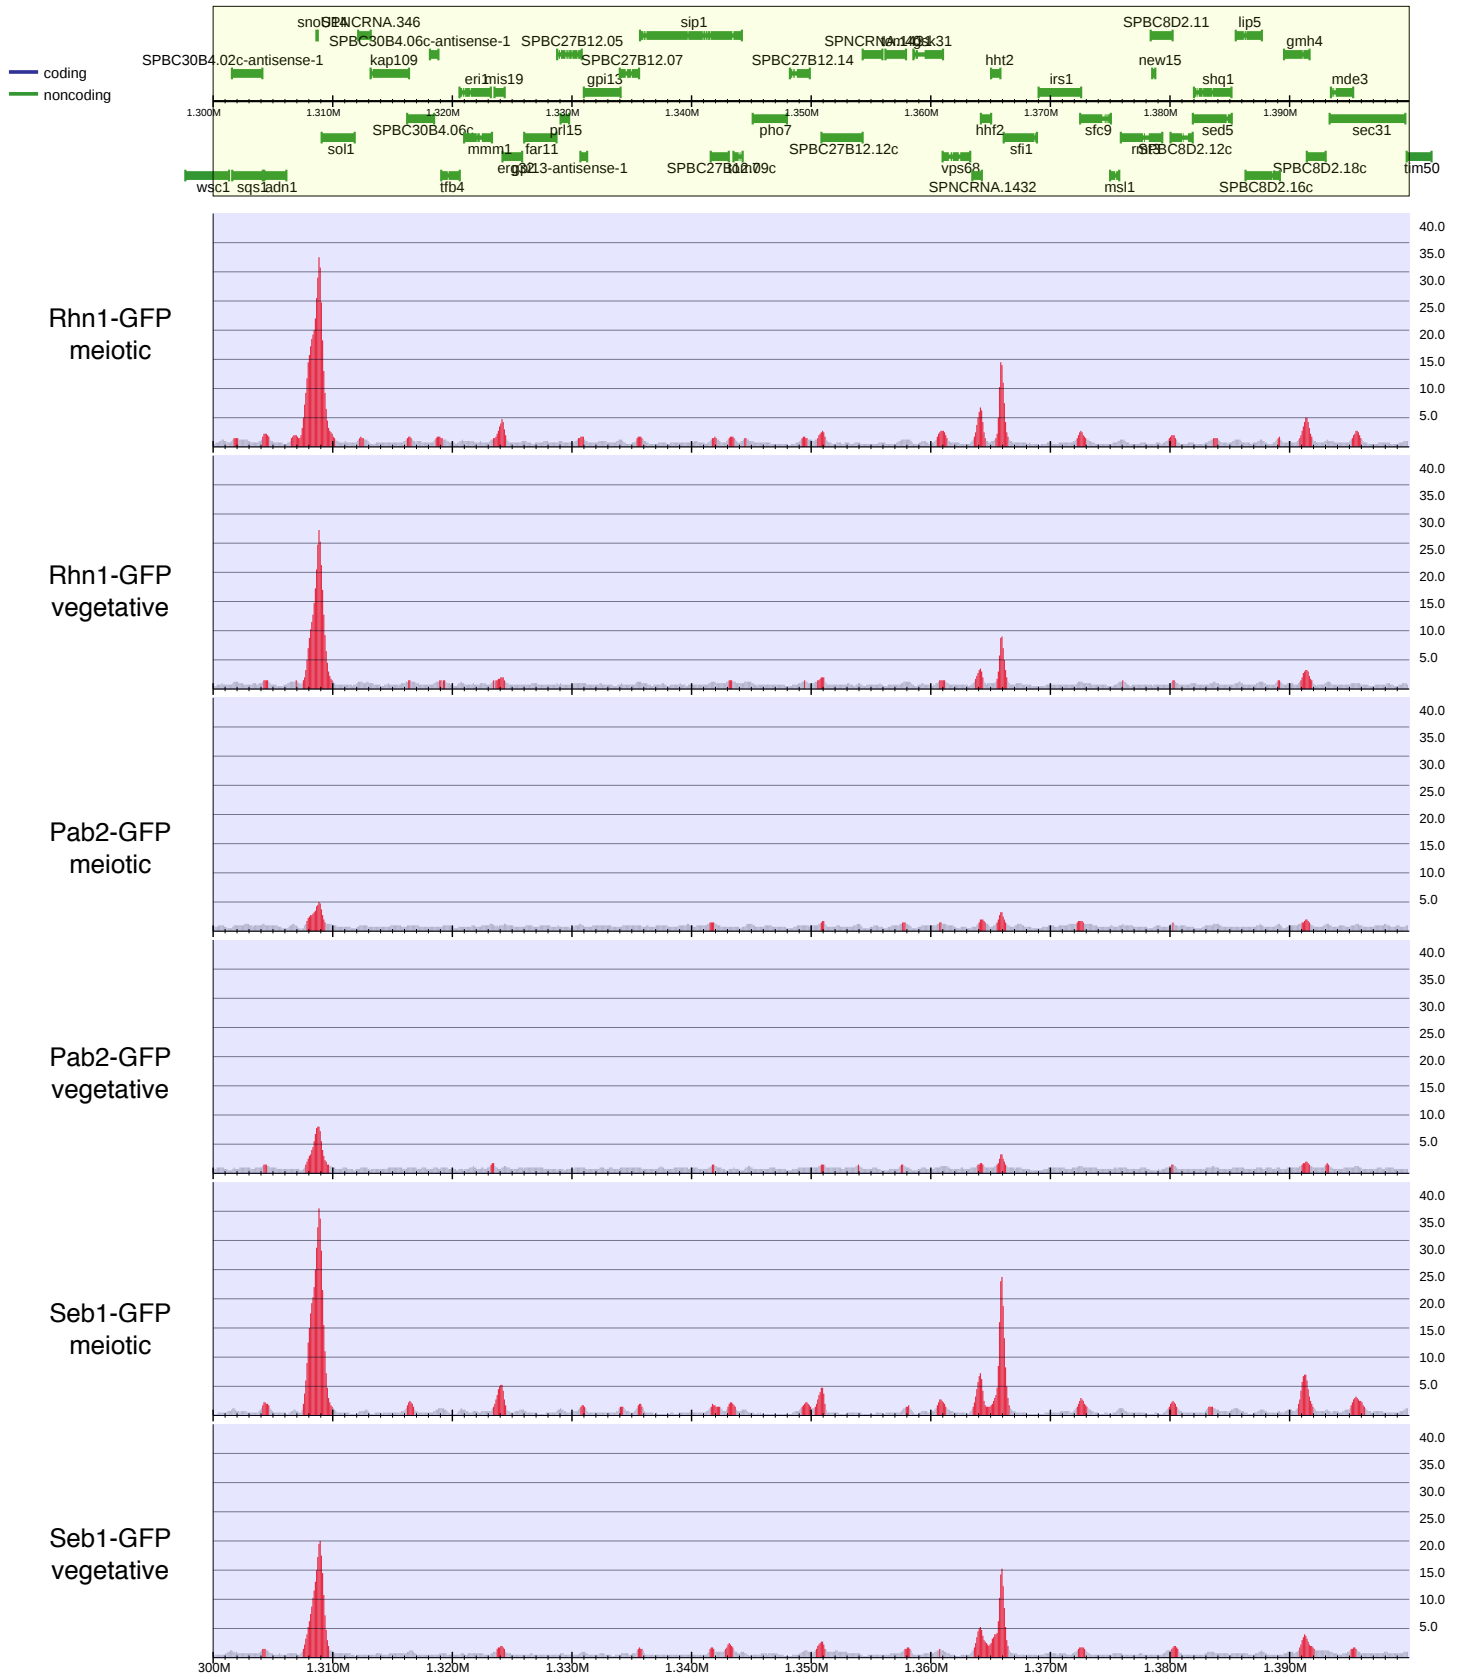

II\_1\_15

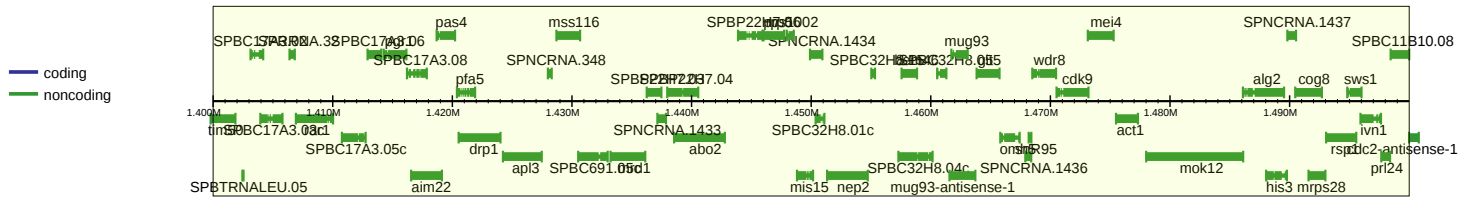

Rhn1-GFP  
meiotic

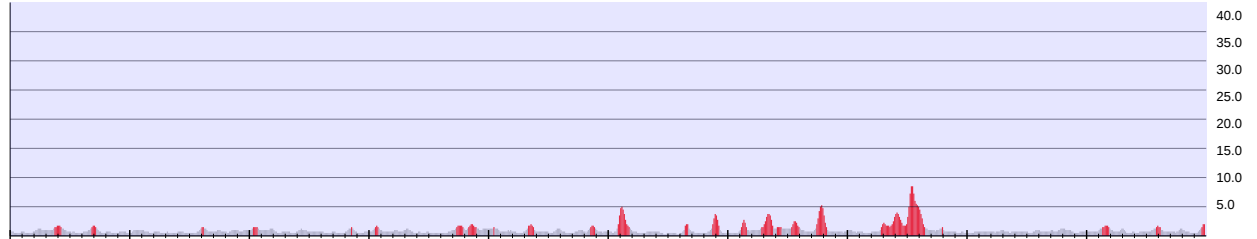

Rhn1-GFP  
vegetative

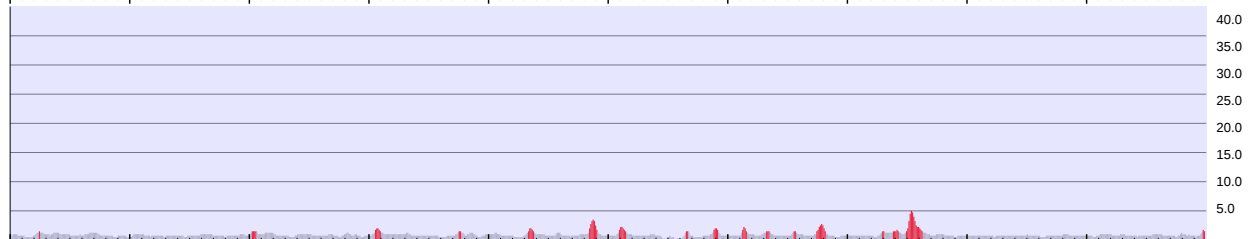

Pab2-GFP  
meiotic

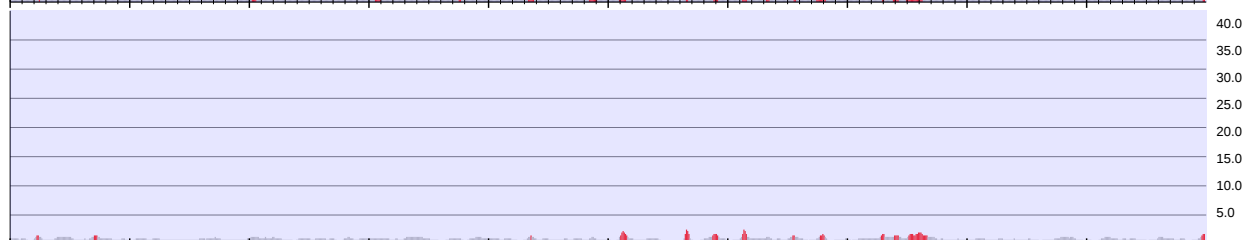

Pab2-GFP  
vegetative

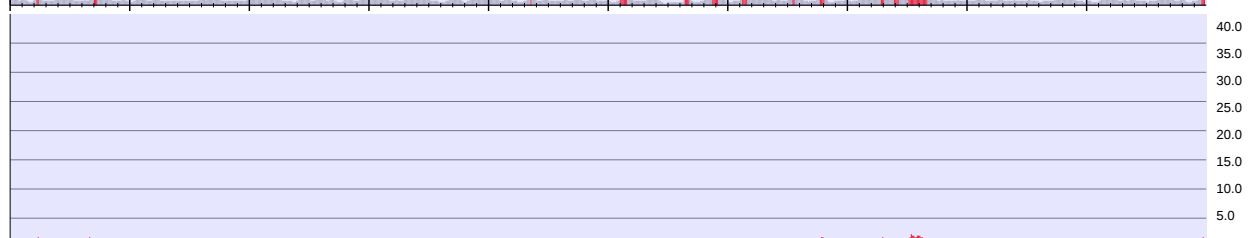

Seb1-GFP  
meiotic

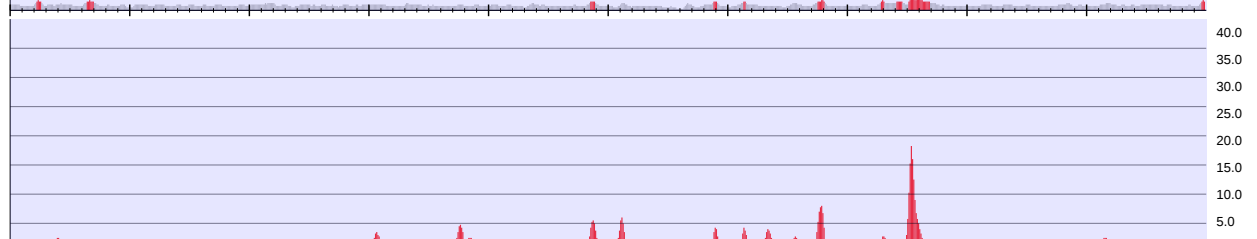

Seb1-GFP  
vegetative

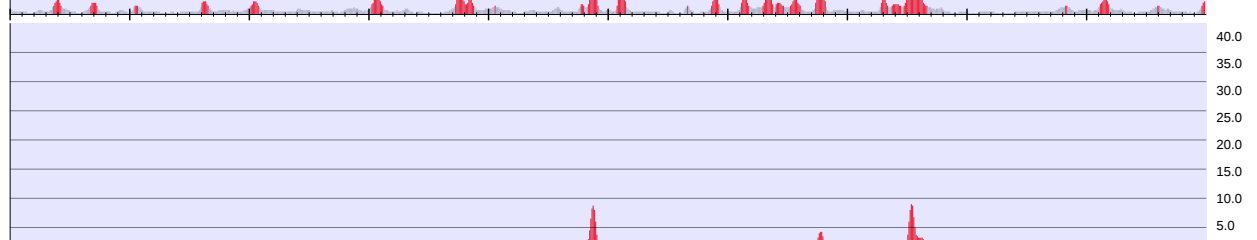

400M 1.410M 1.420M 1.430M 1.440M 1.450M 1.460M 1.470M 1.480M 1.490M

II\_1\_16

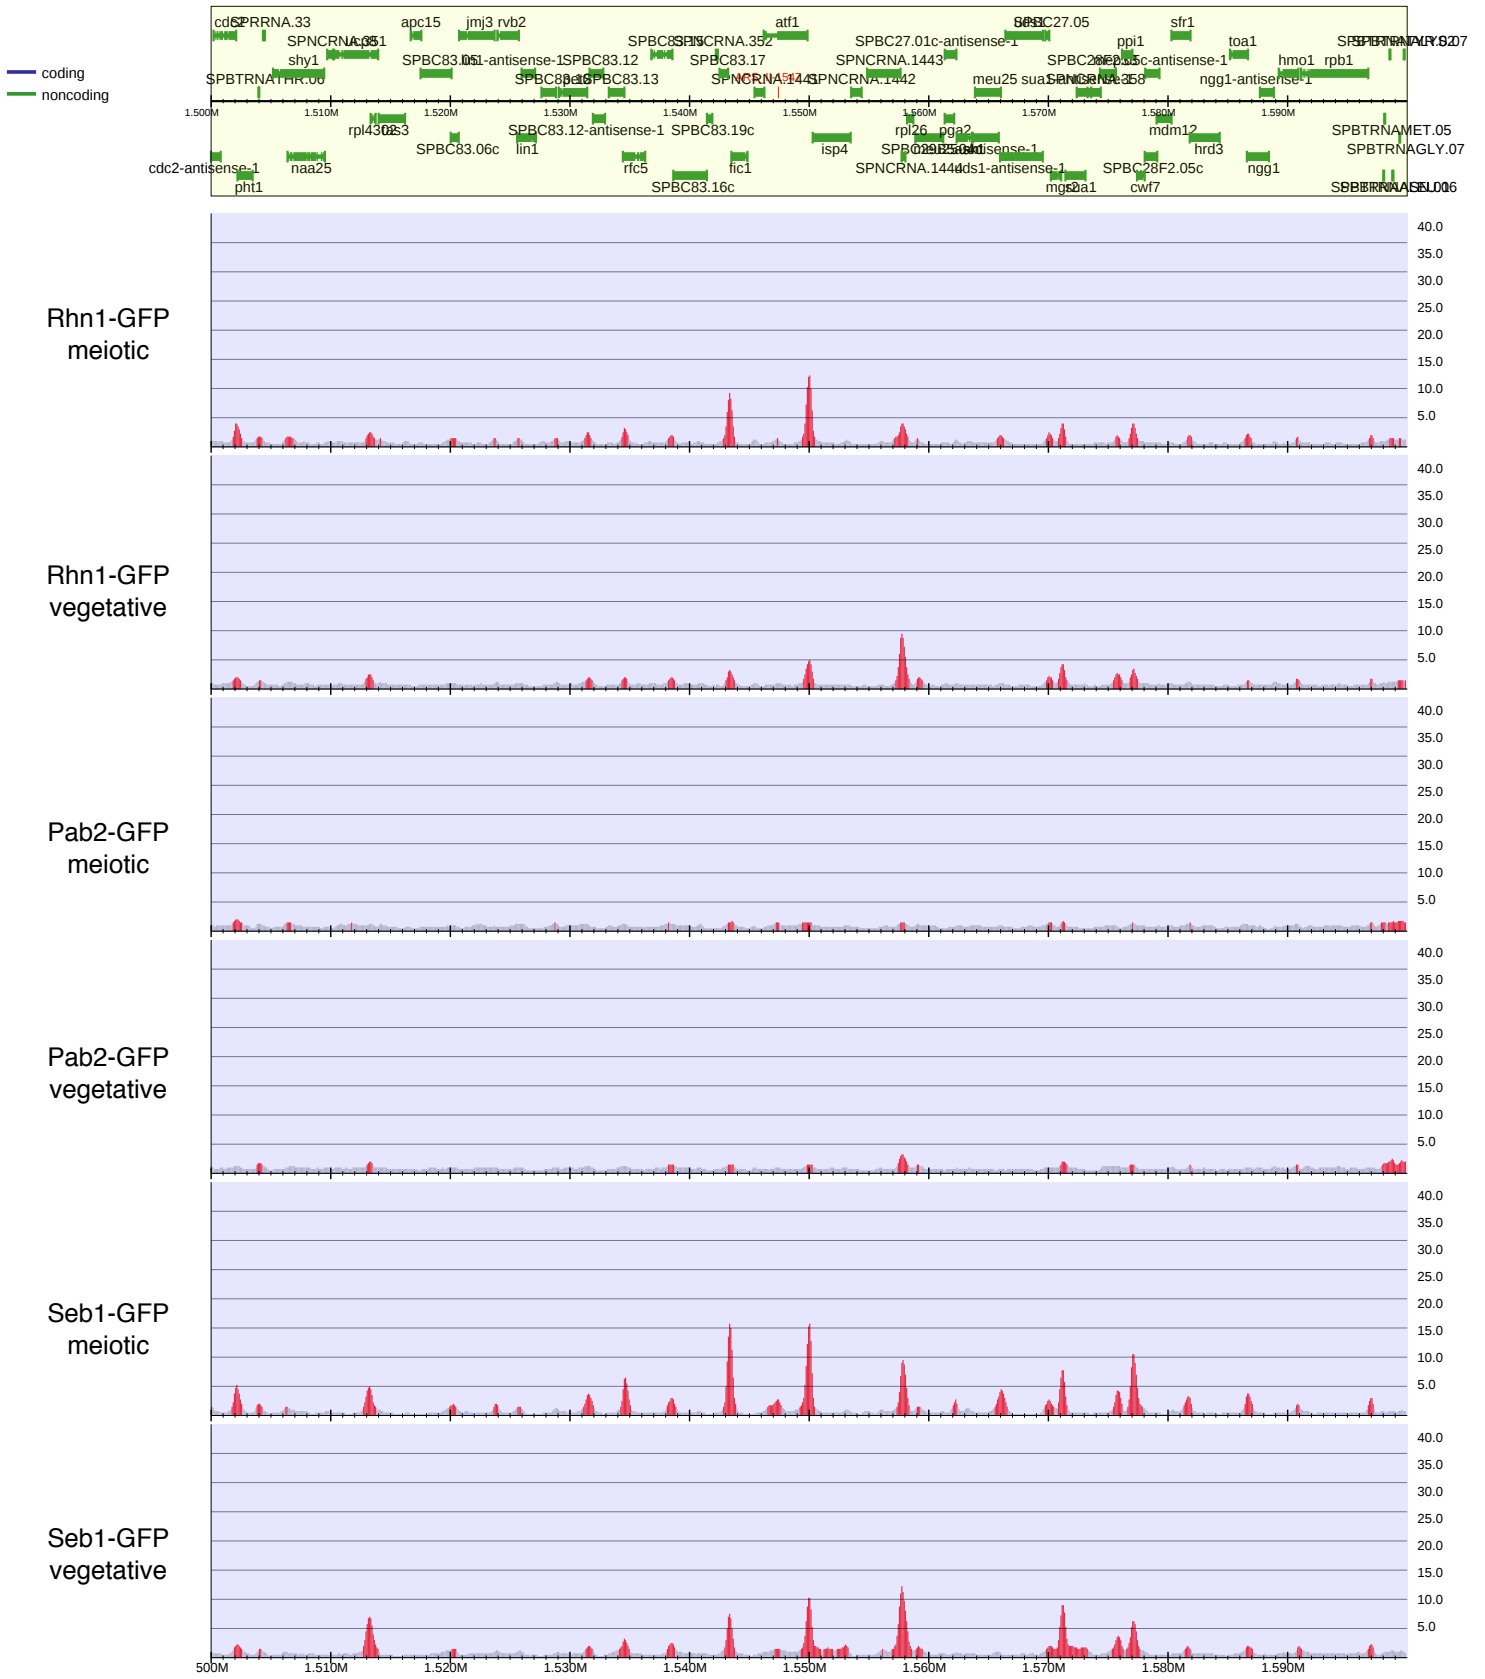

II\_1\_17

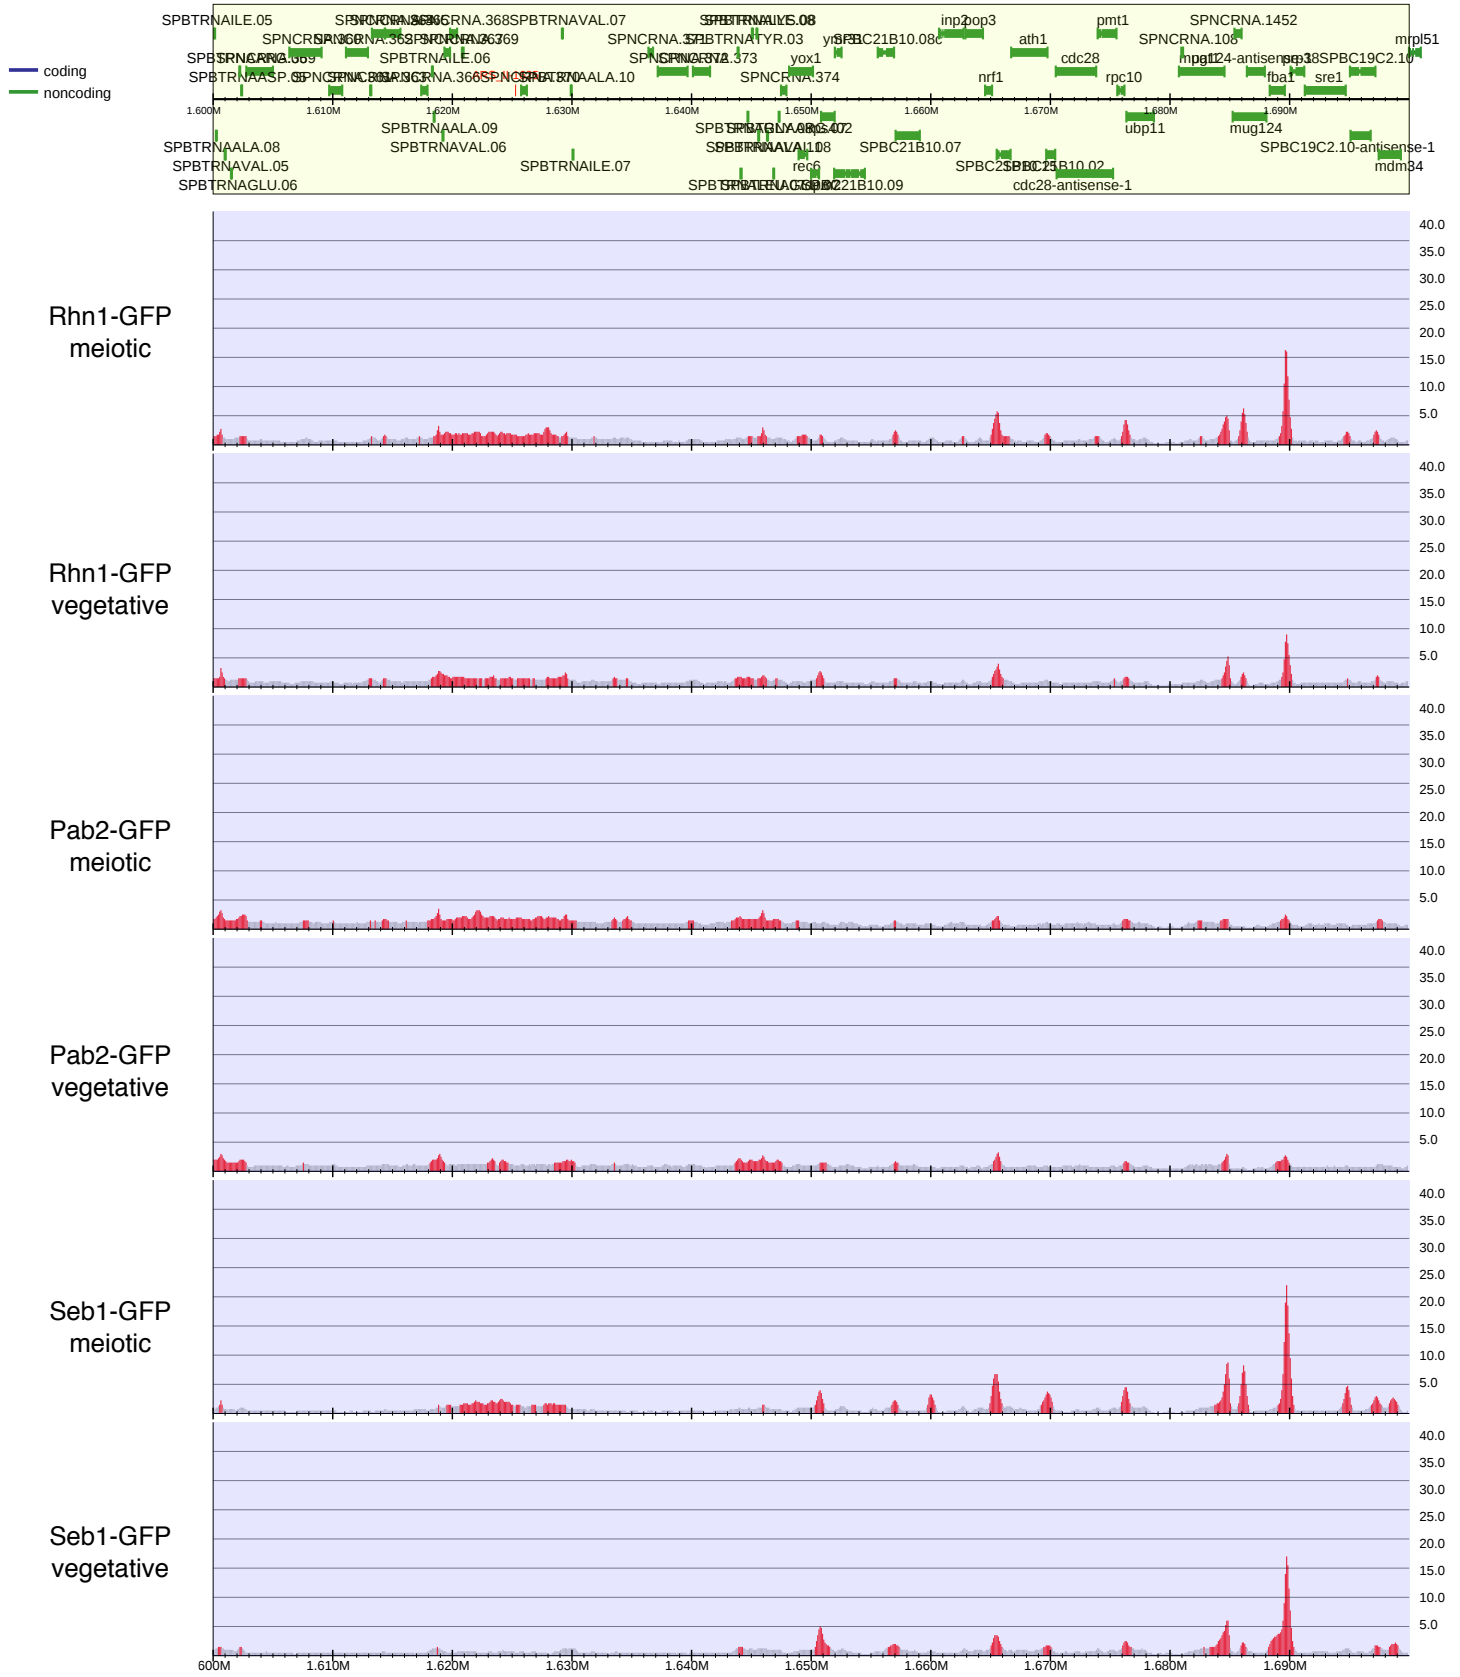

II\_1\_18

coding  
noncoding

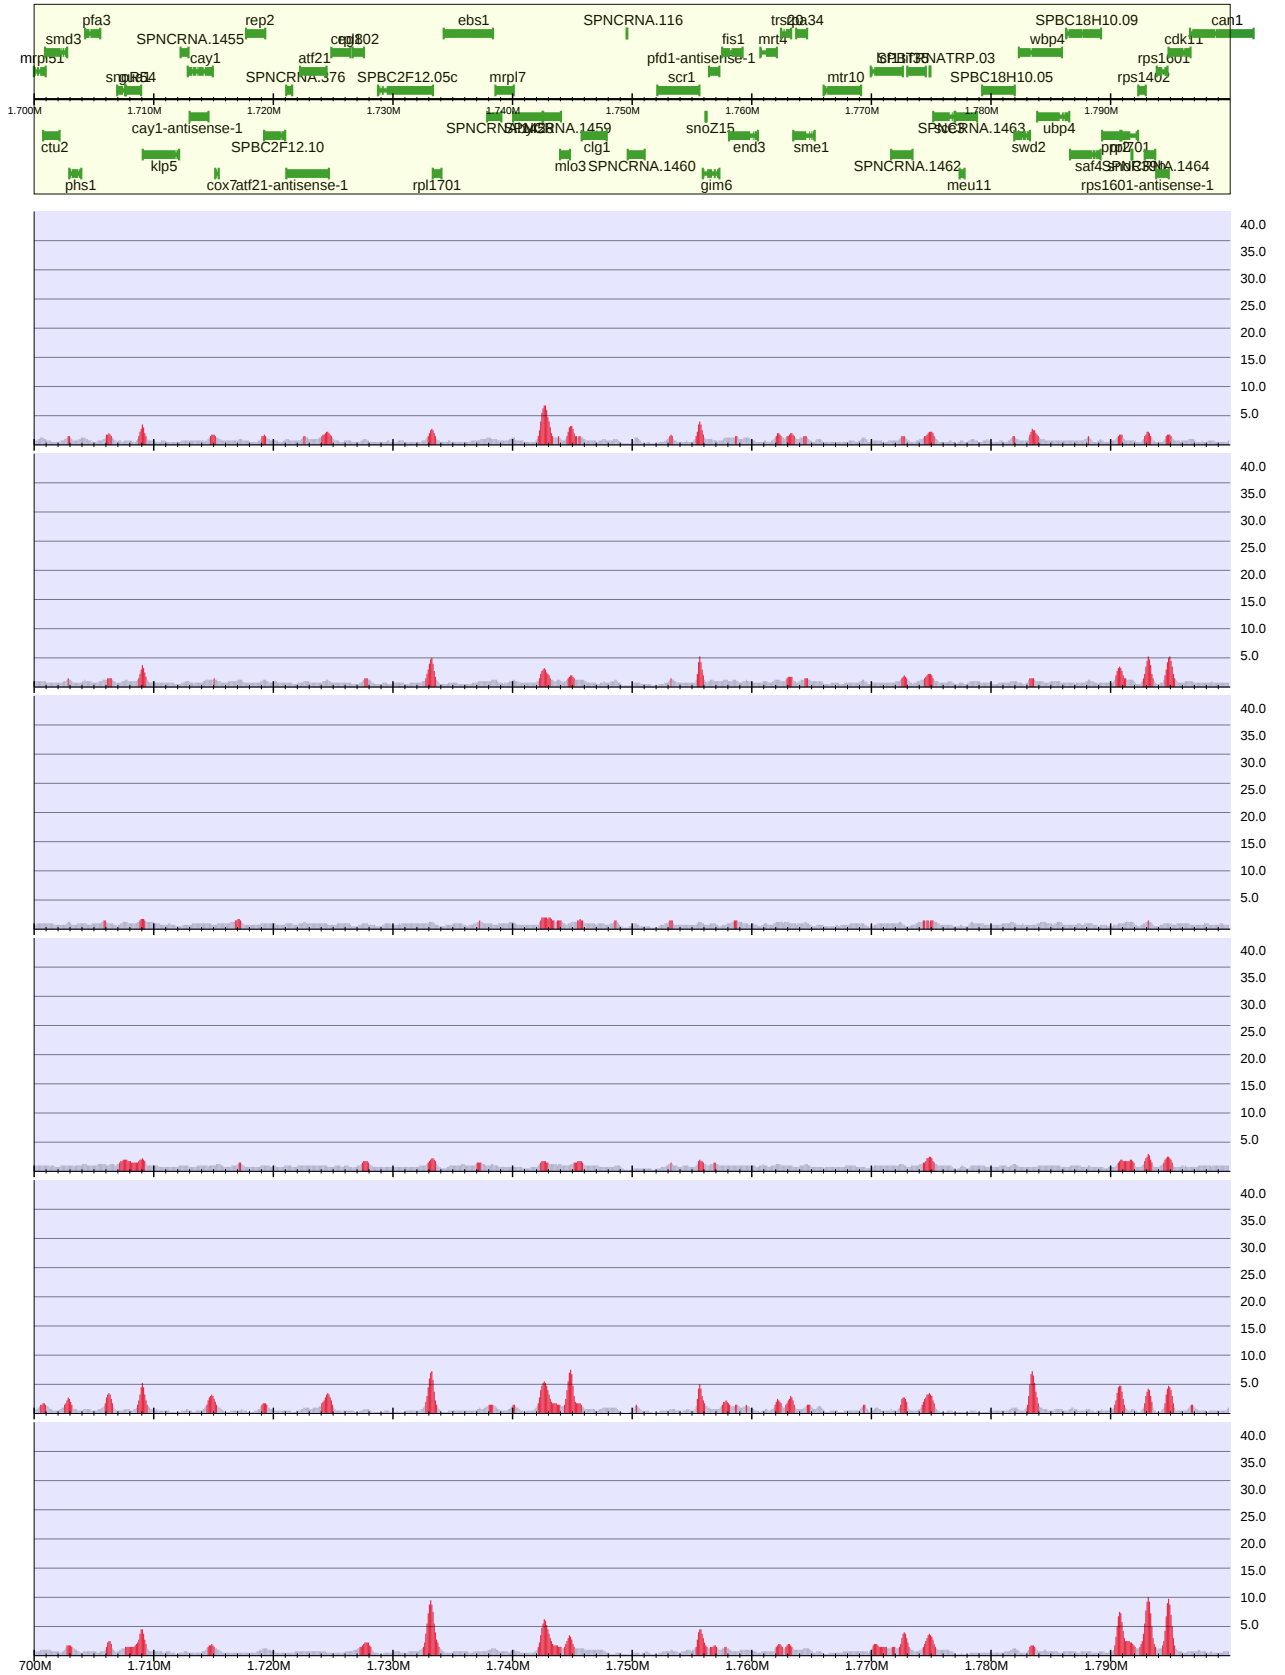

II\_1\_19

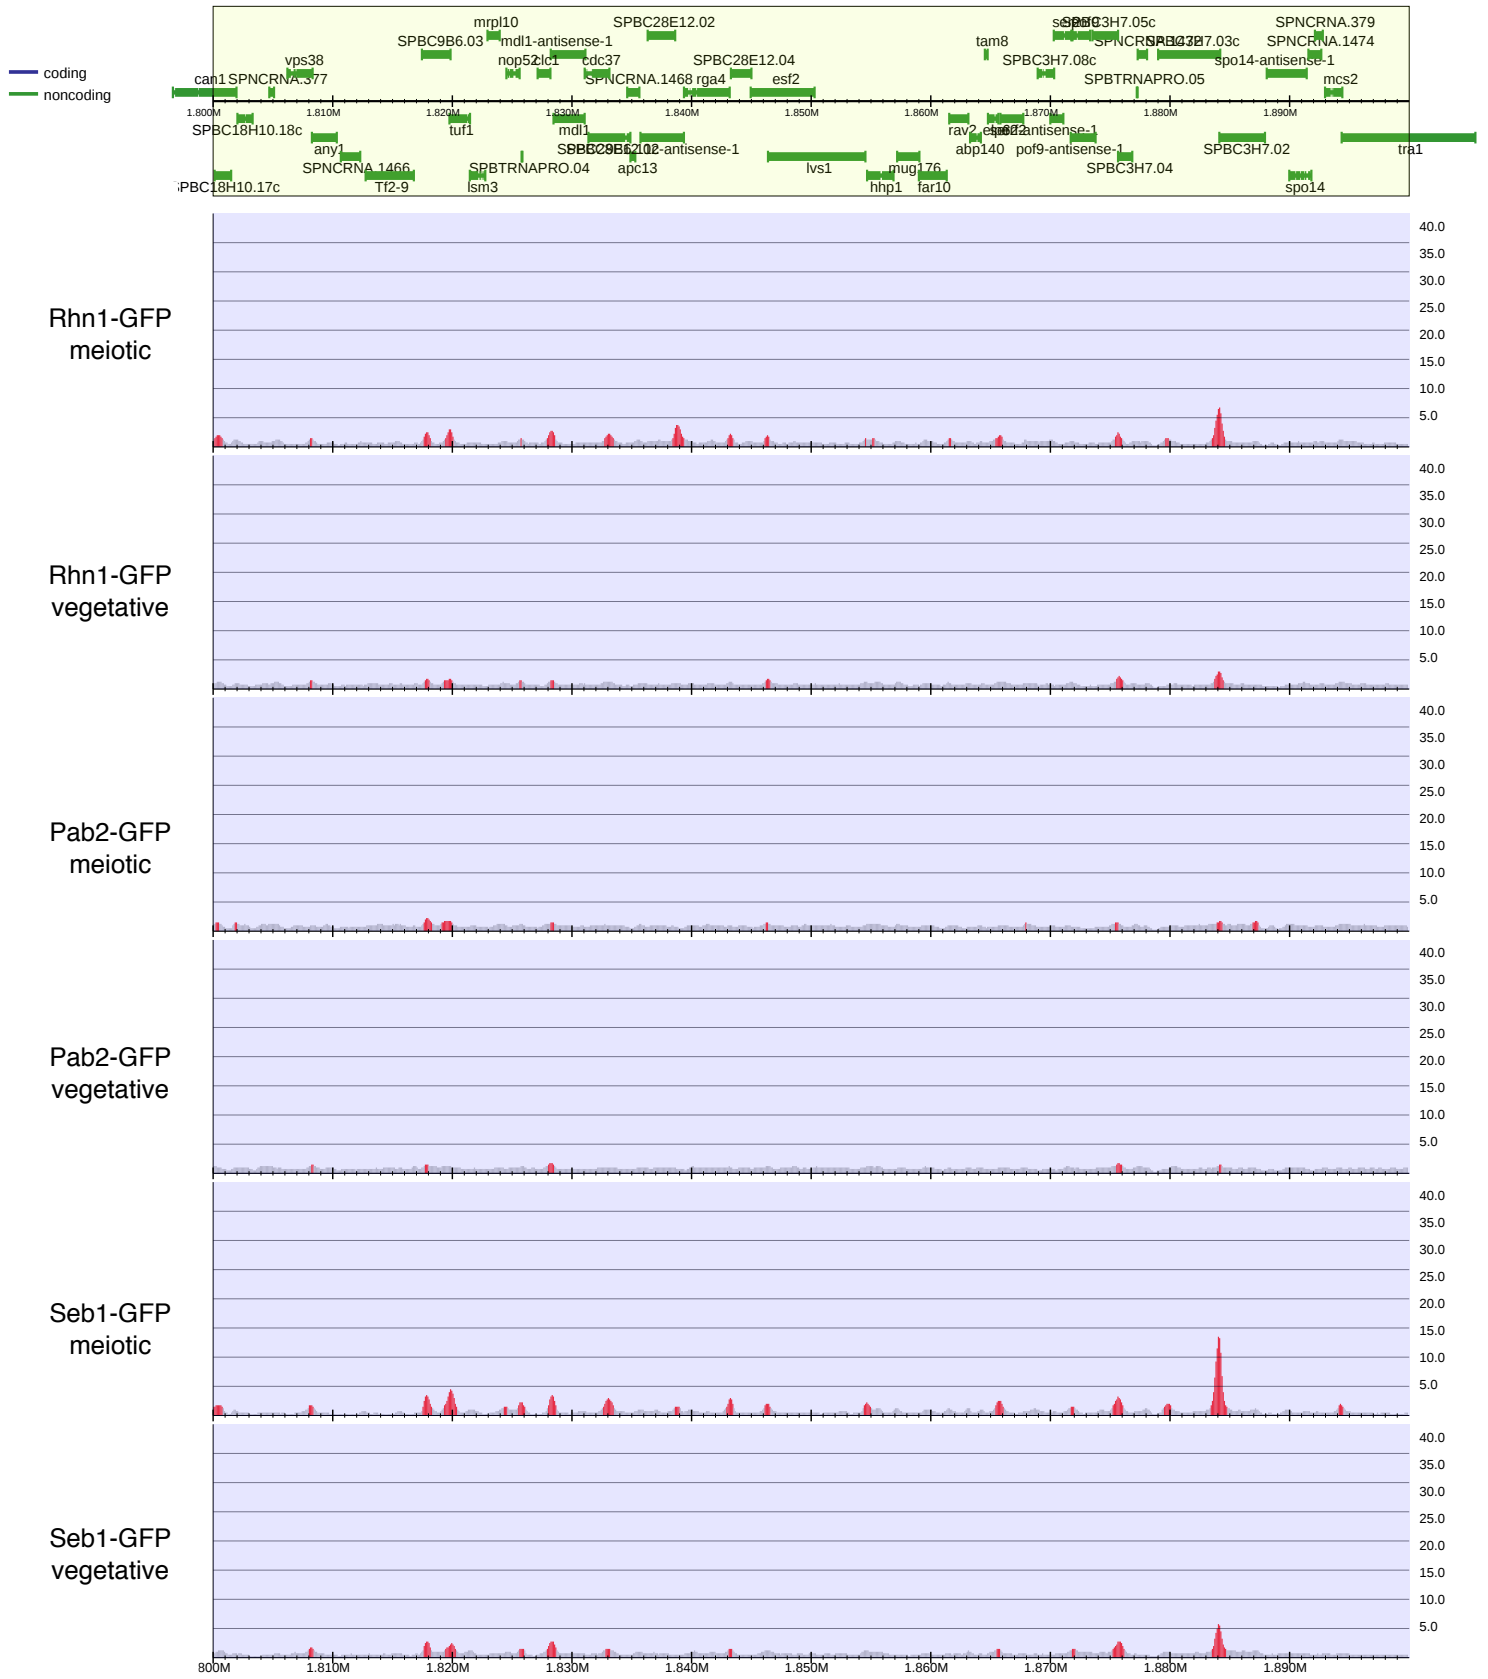

II\_1\_20

coding  
noncoding

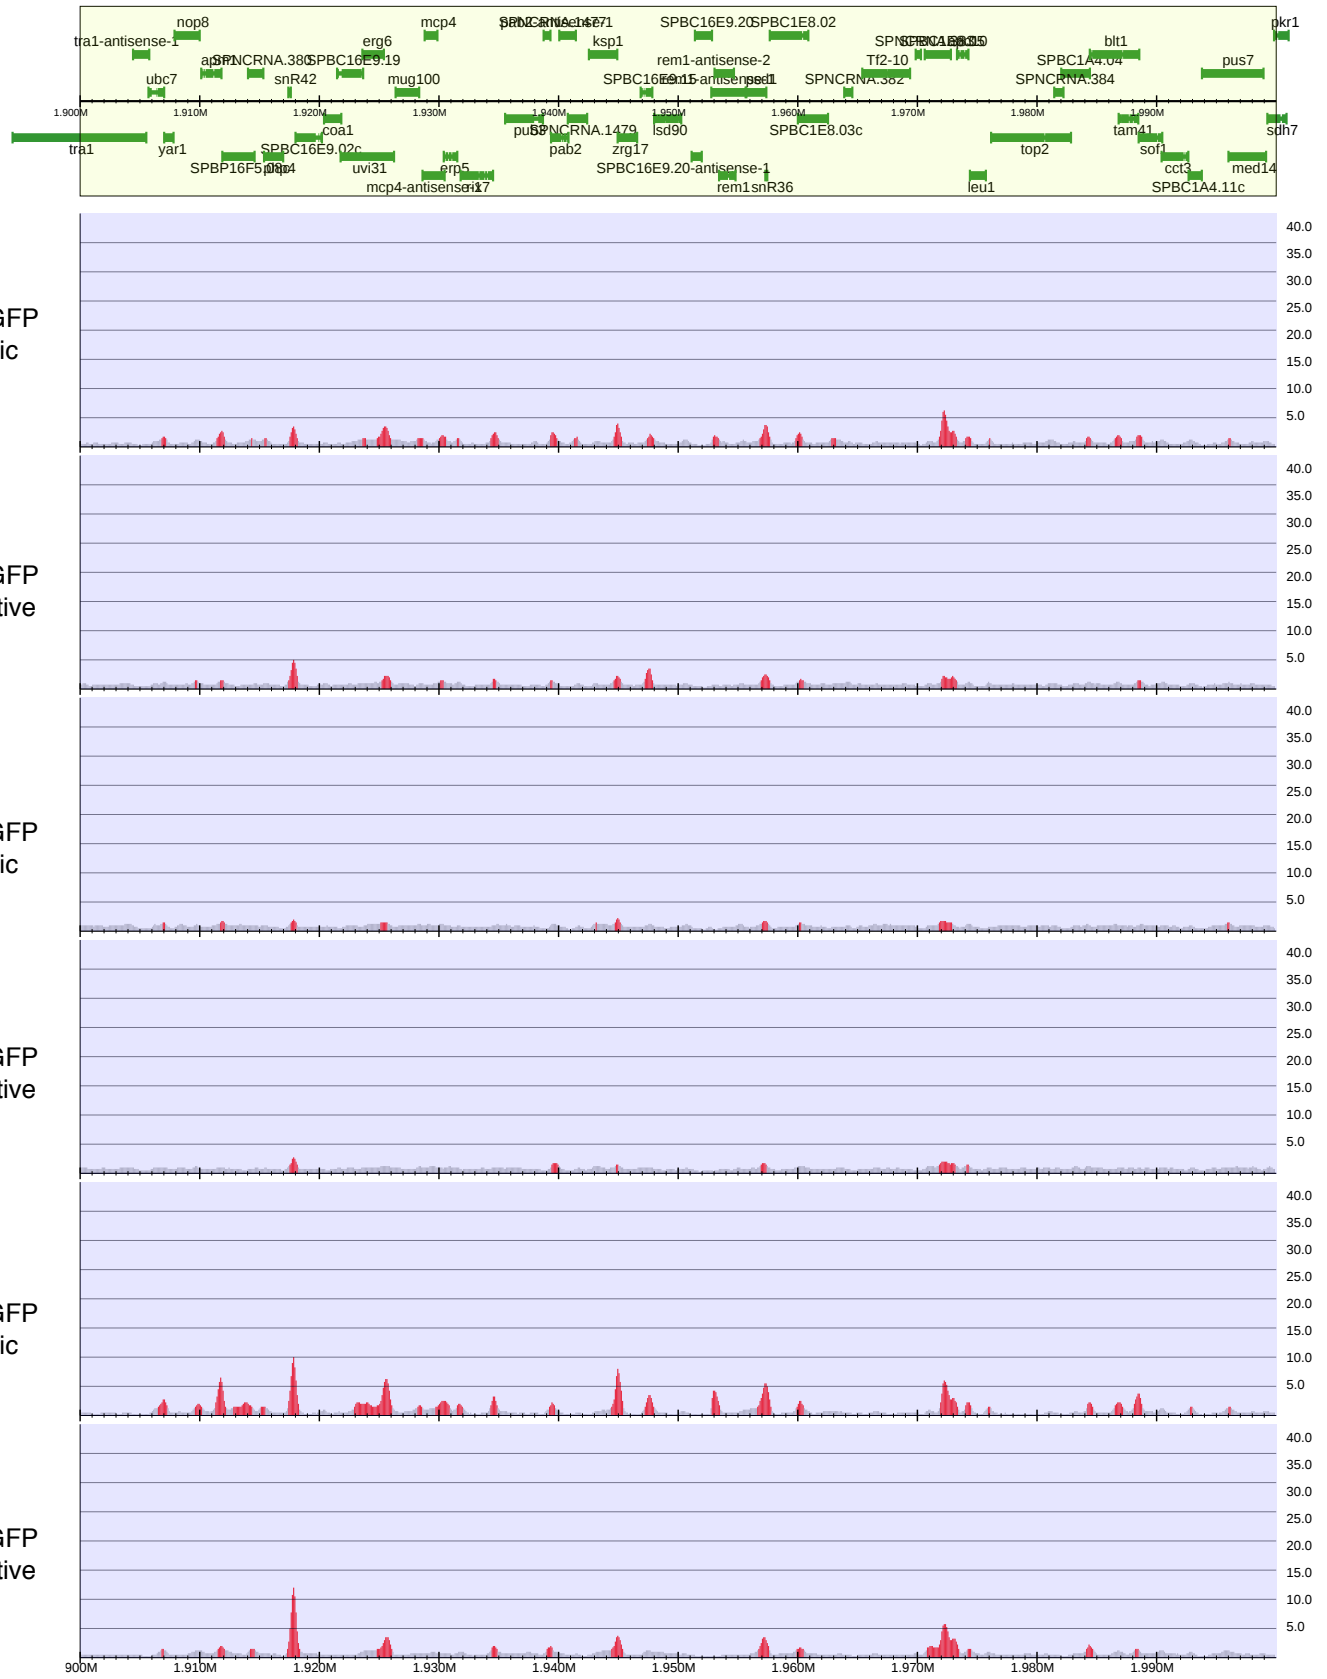



II\_1\_21

— coding  
— noncoding

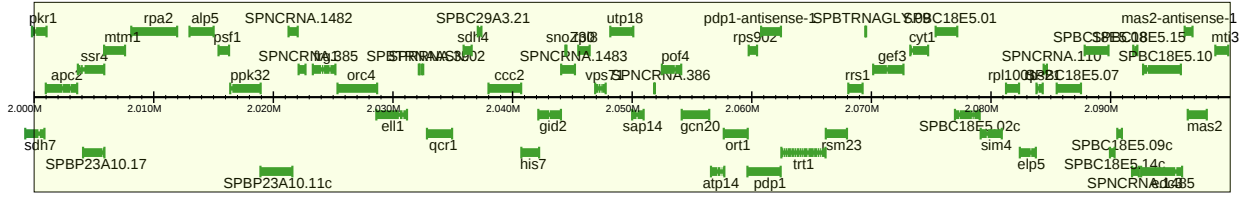

Rhn1-GFP  
meiotic

Rhn1-GFP  
vegetative

Pab2-GFP  
meiotic

Pab2-GFP  
vegetative

Seb1-GFP  
meiotic

Seb1-GFP  
vegetative

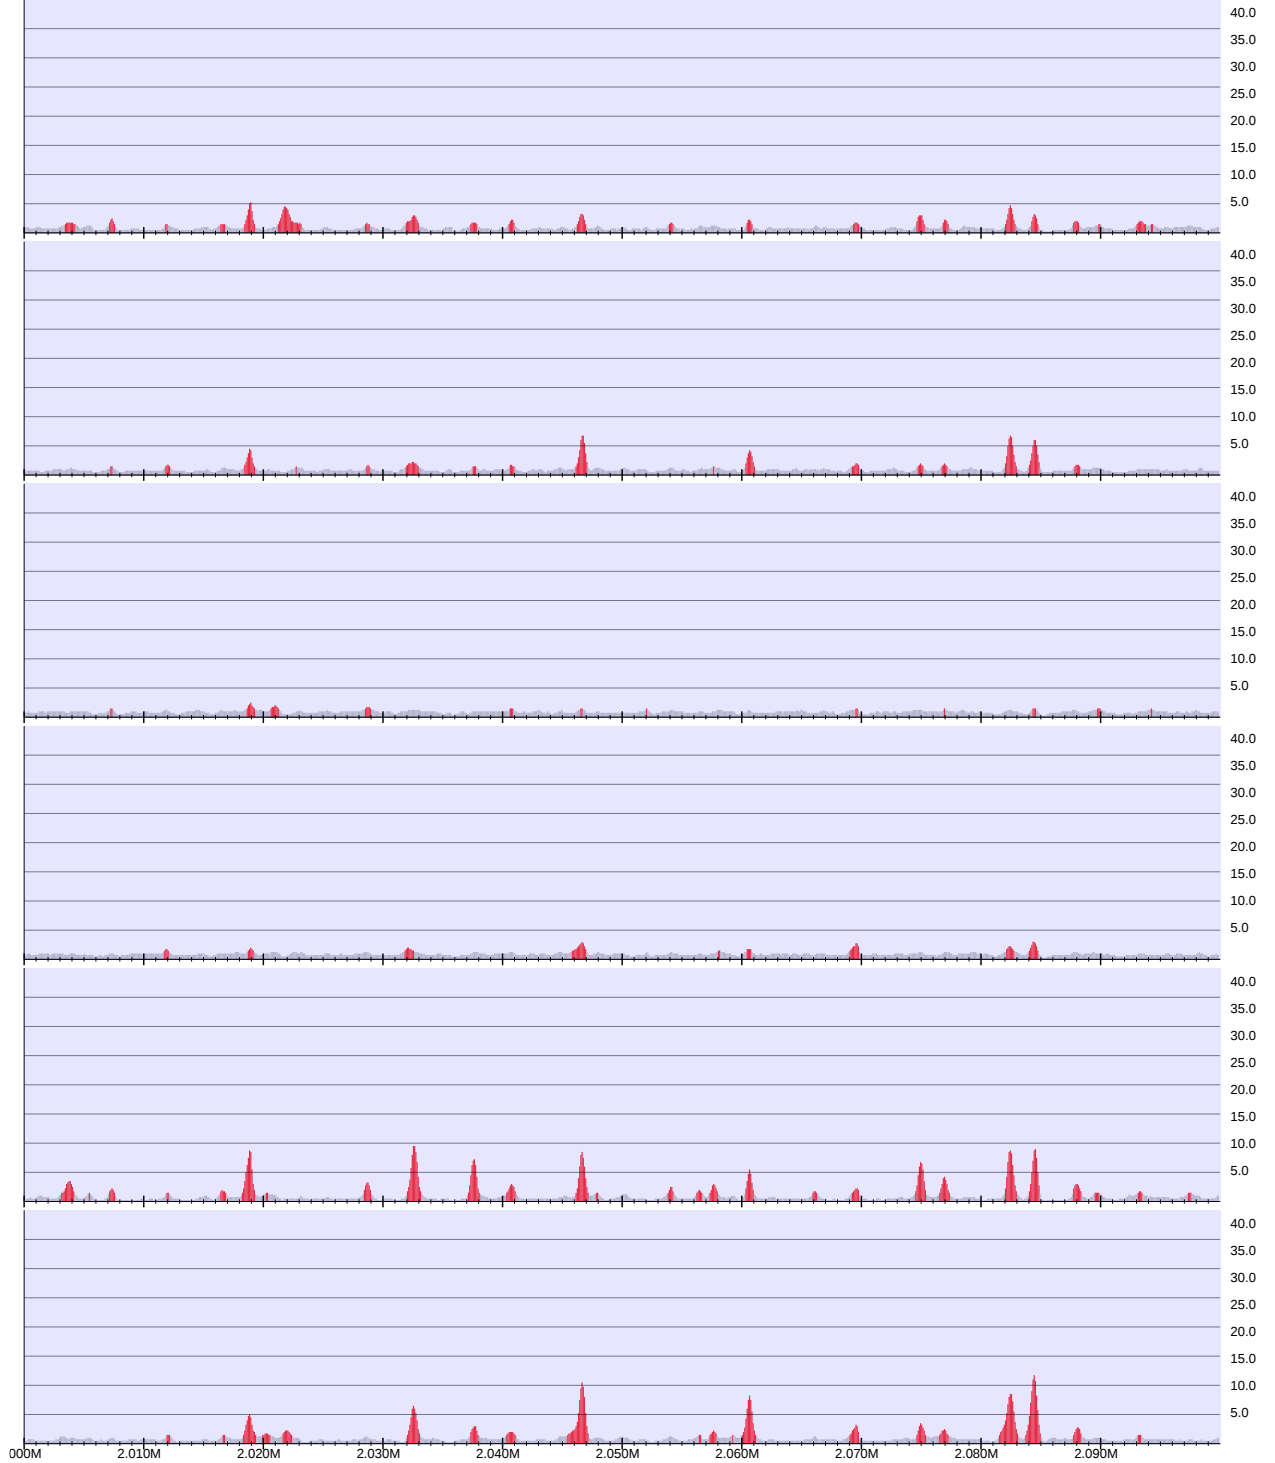

II\_1\_22

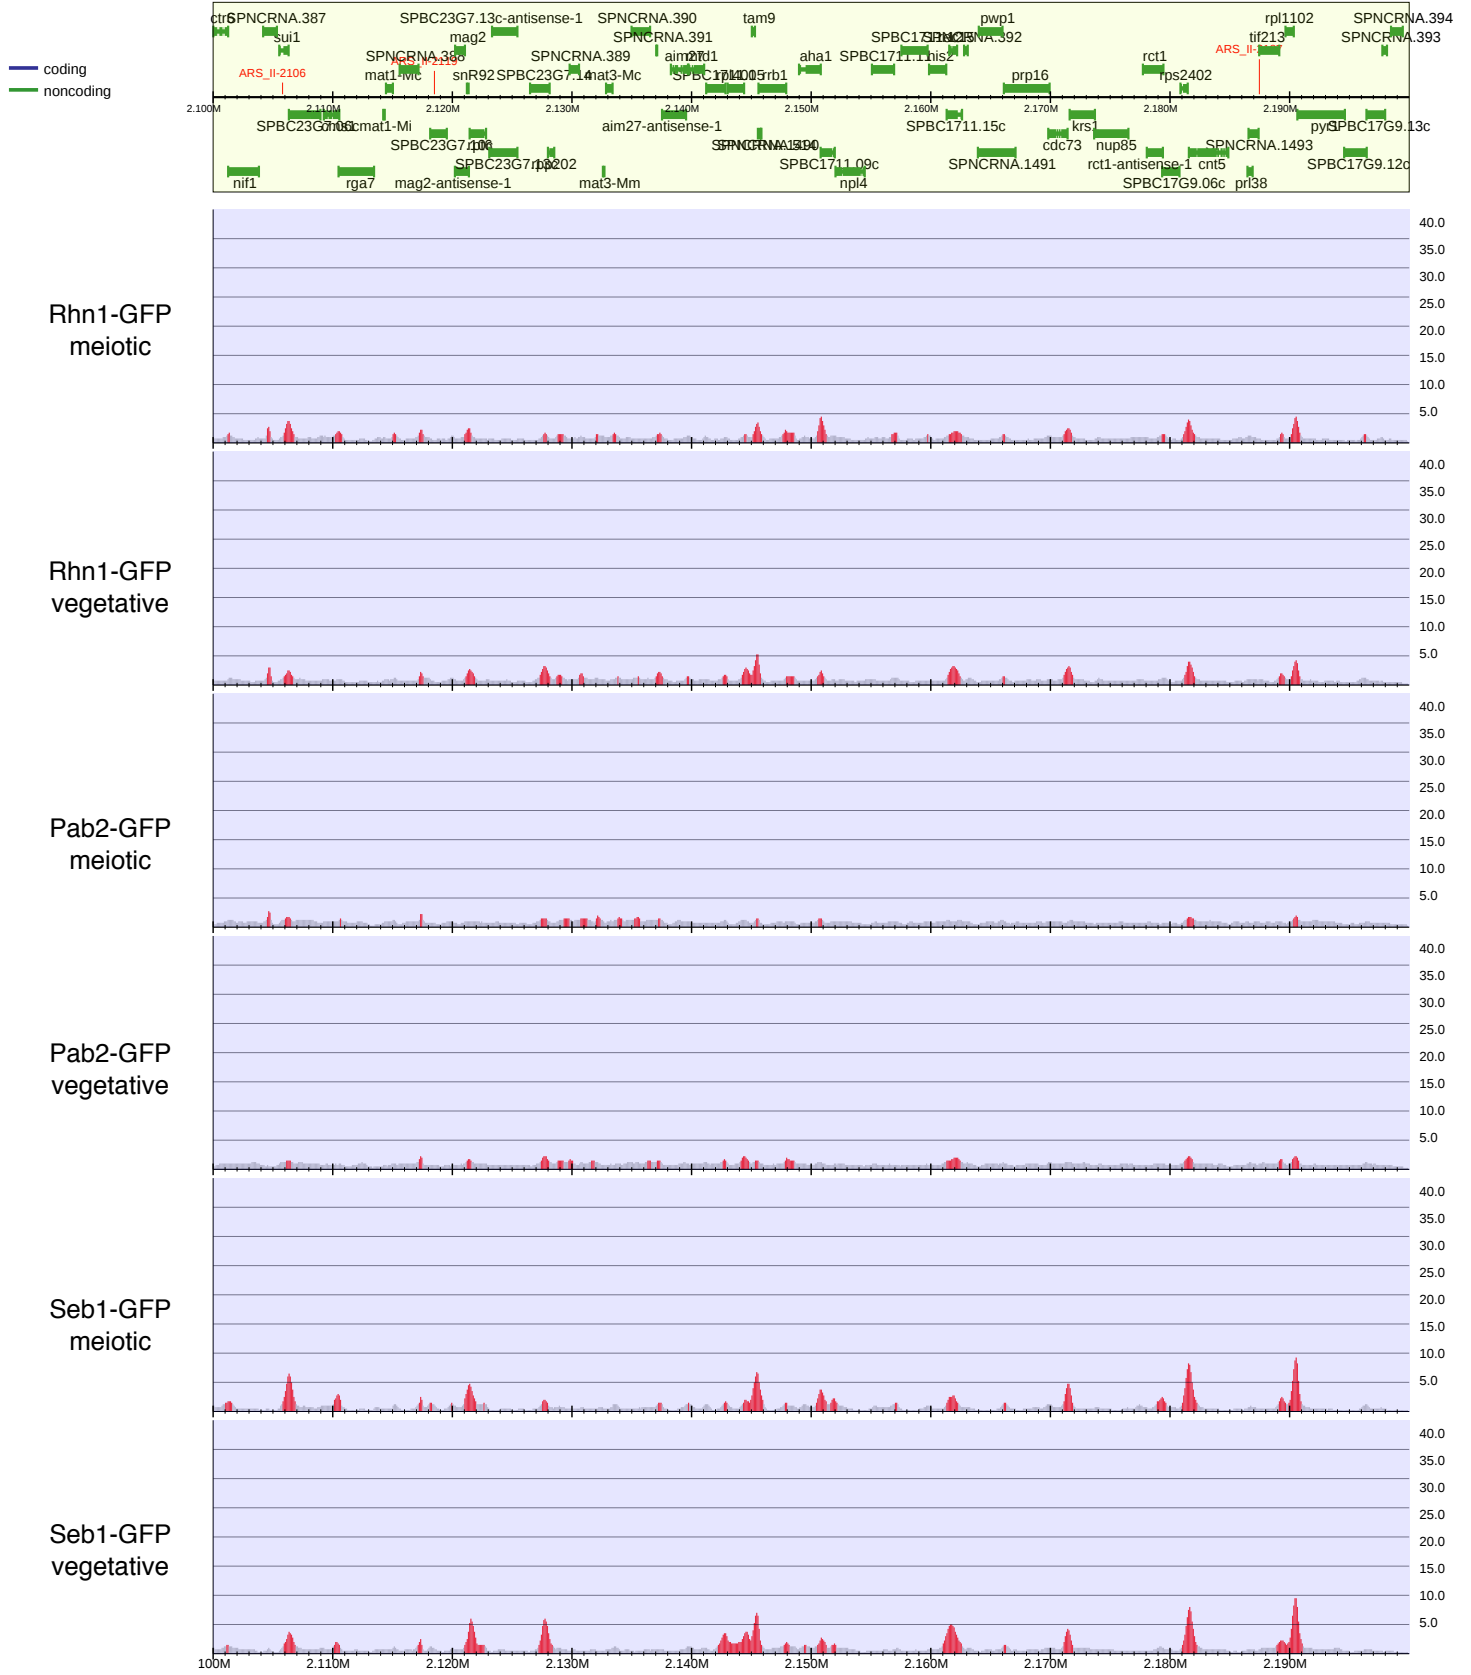

II\_1\_23

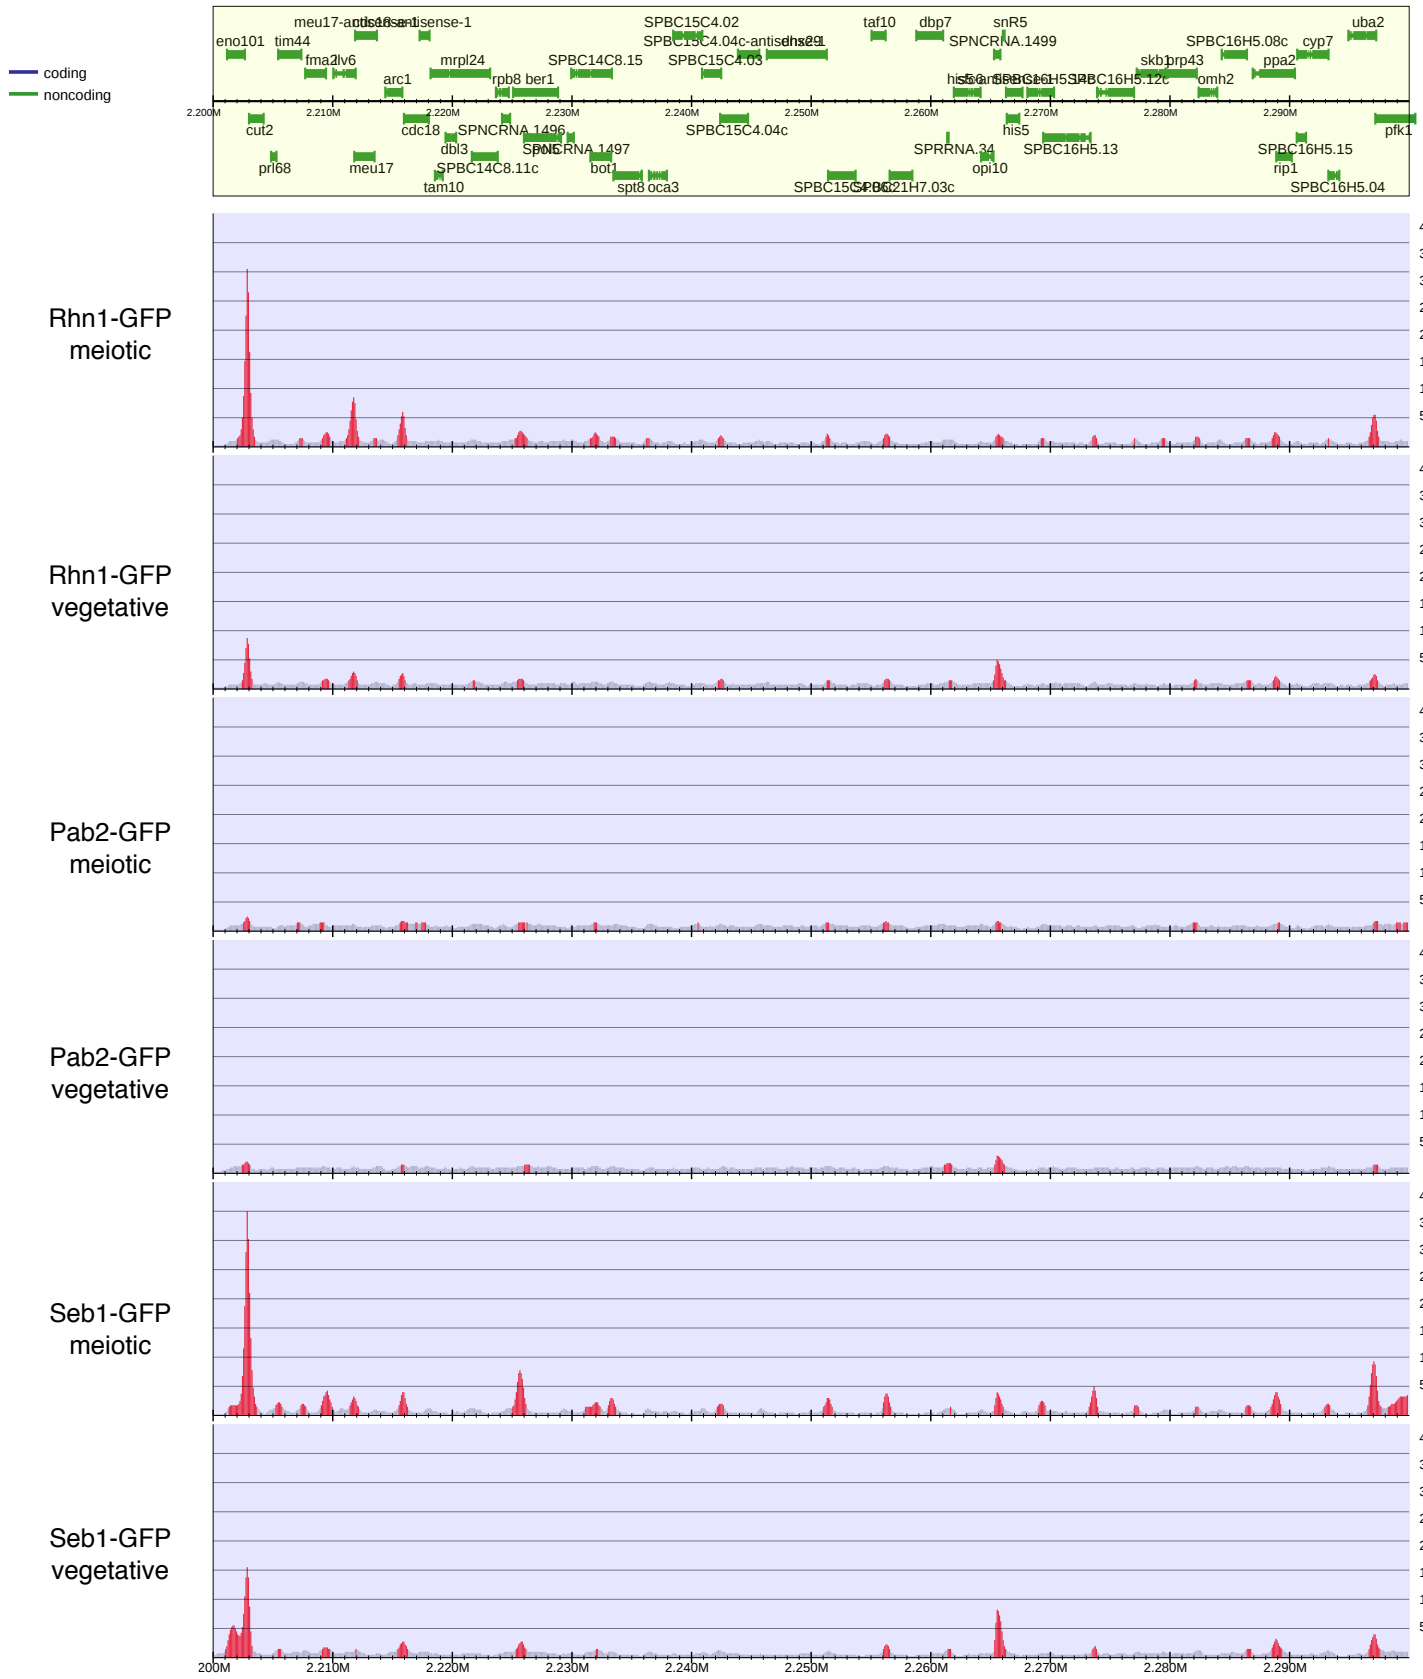

II\_1\_24

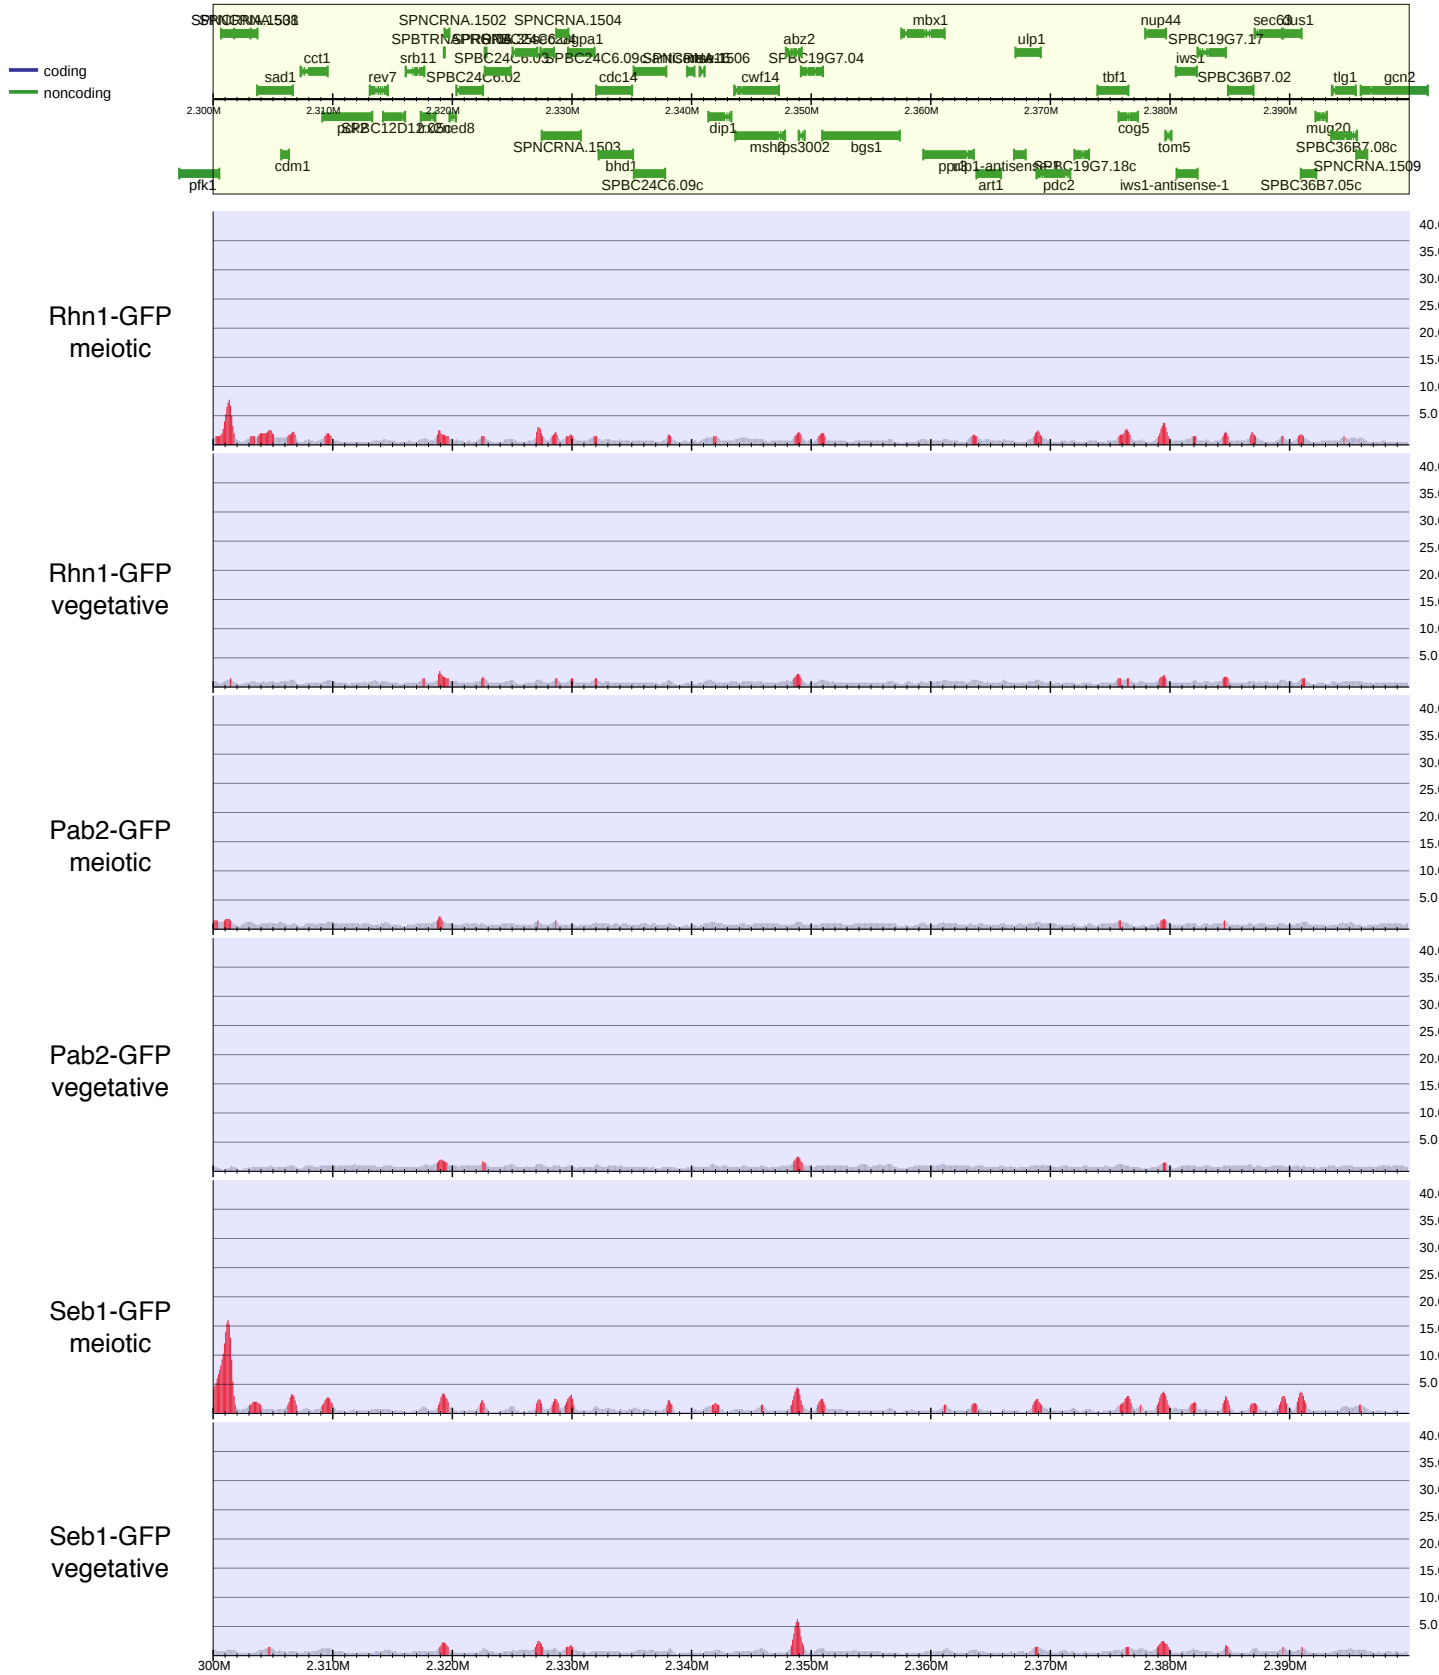



II\_1\_26

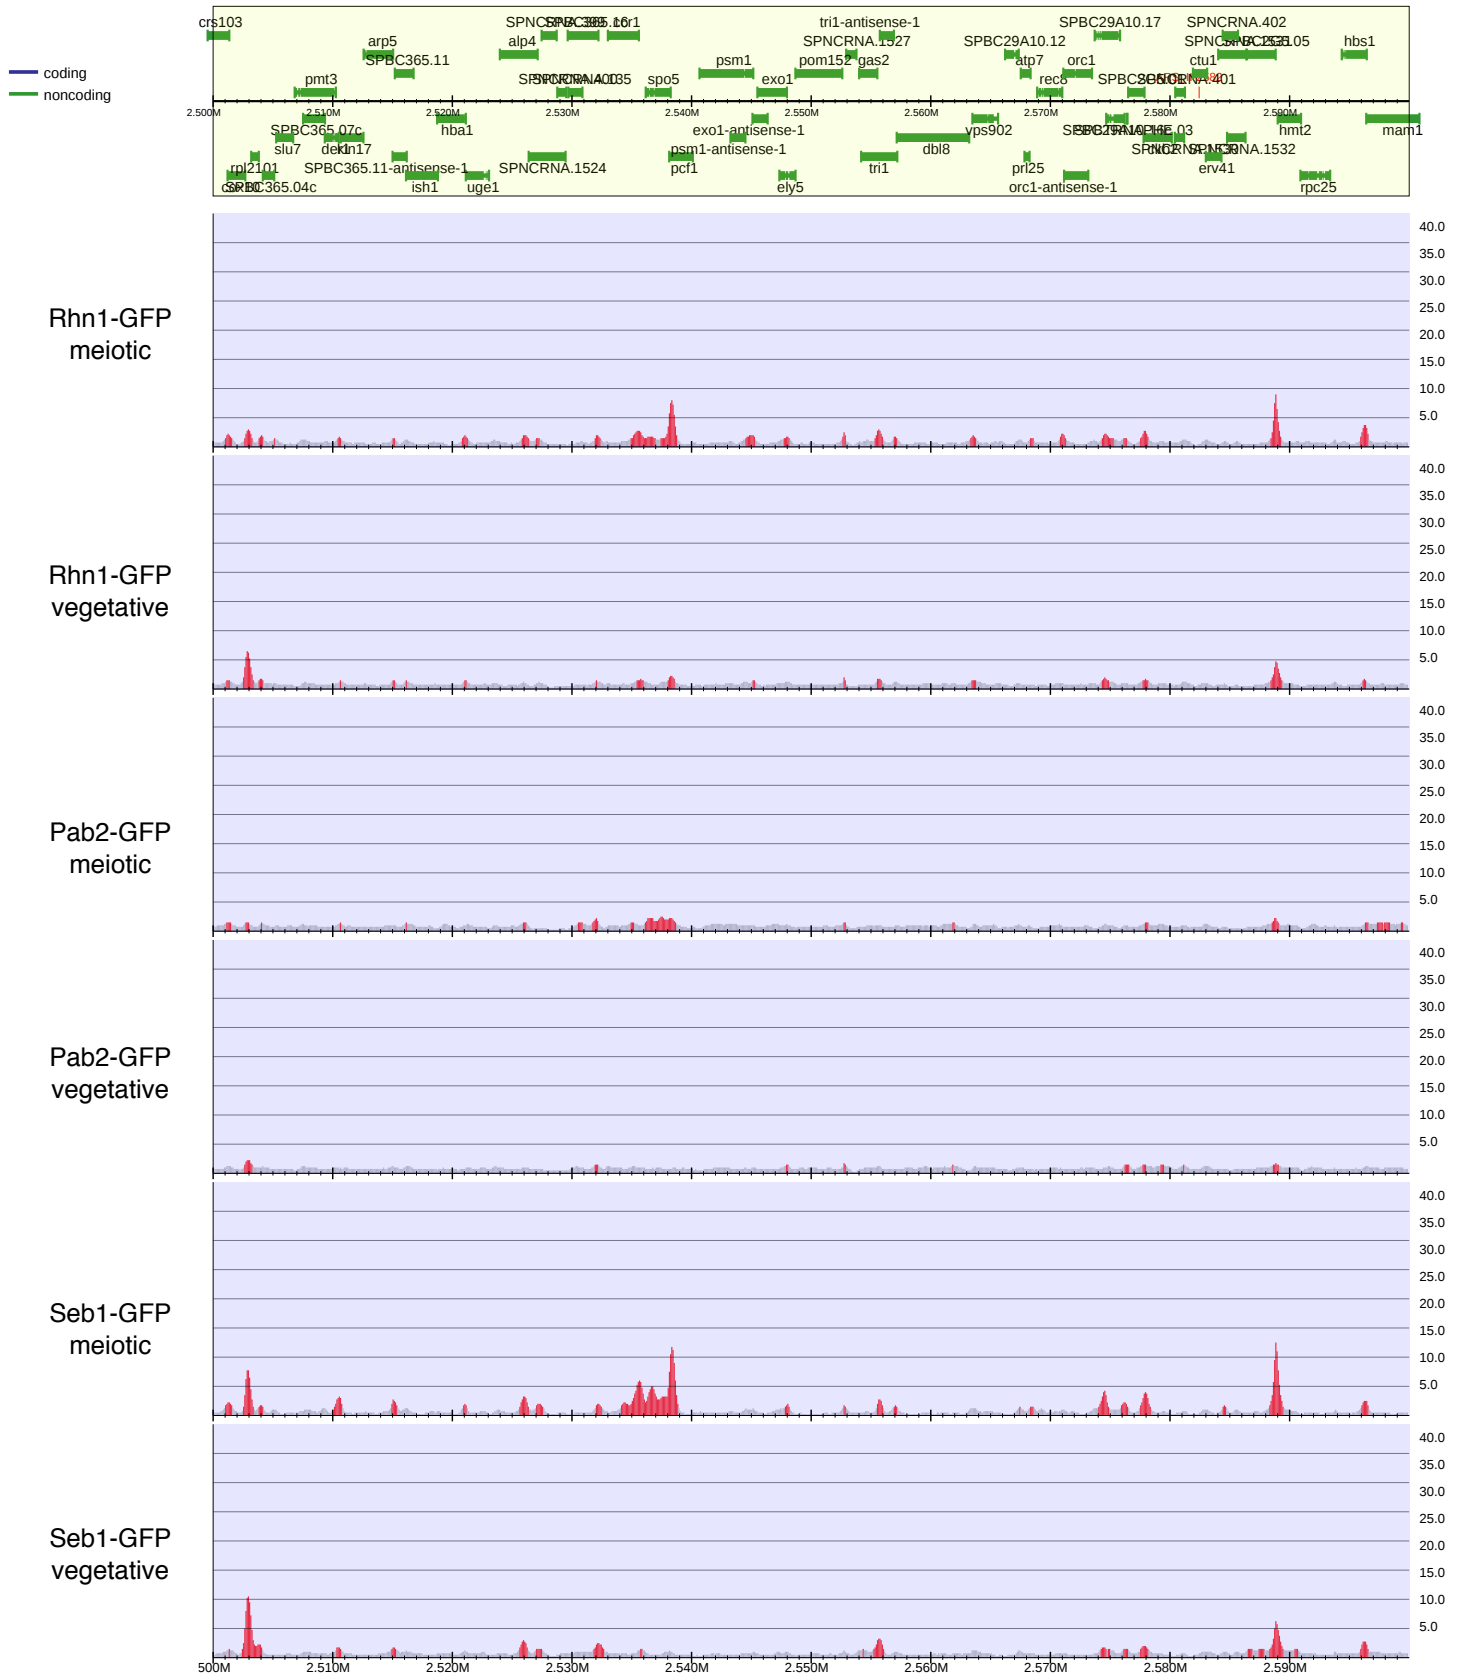

II\_1\_27

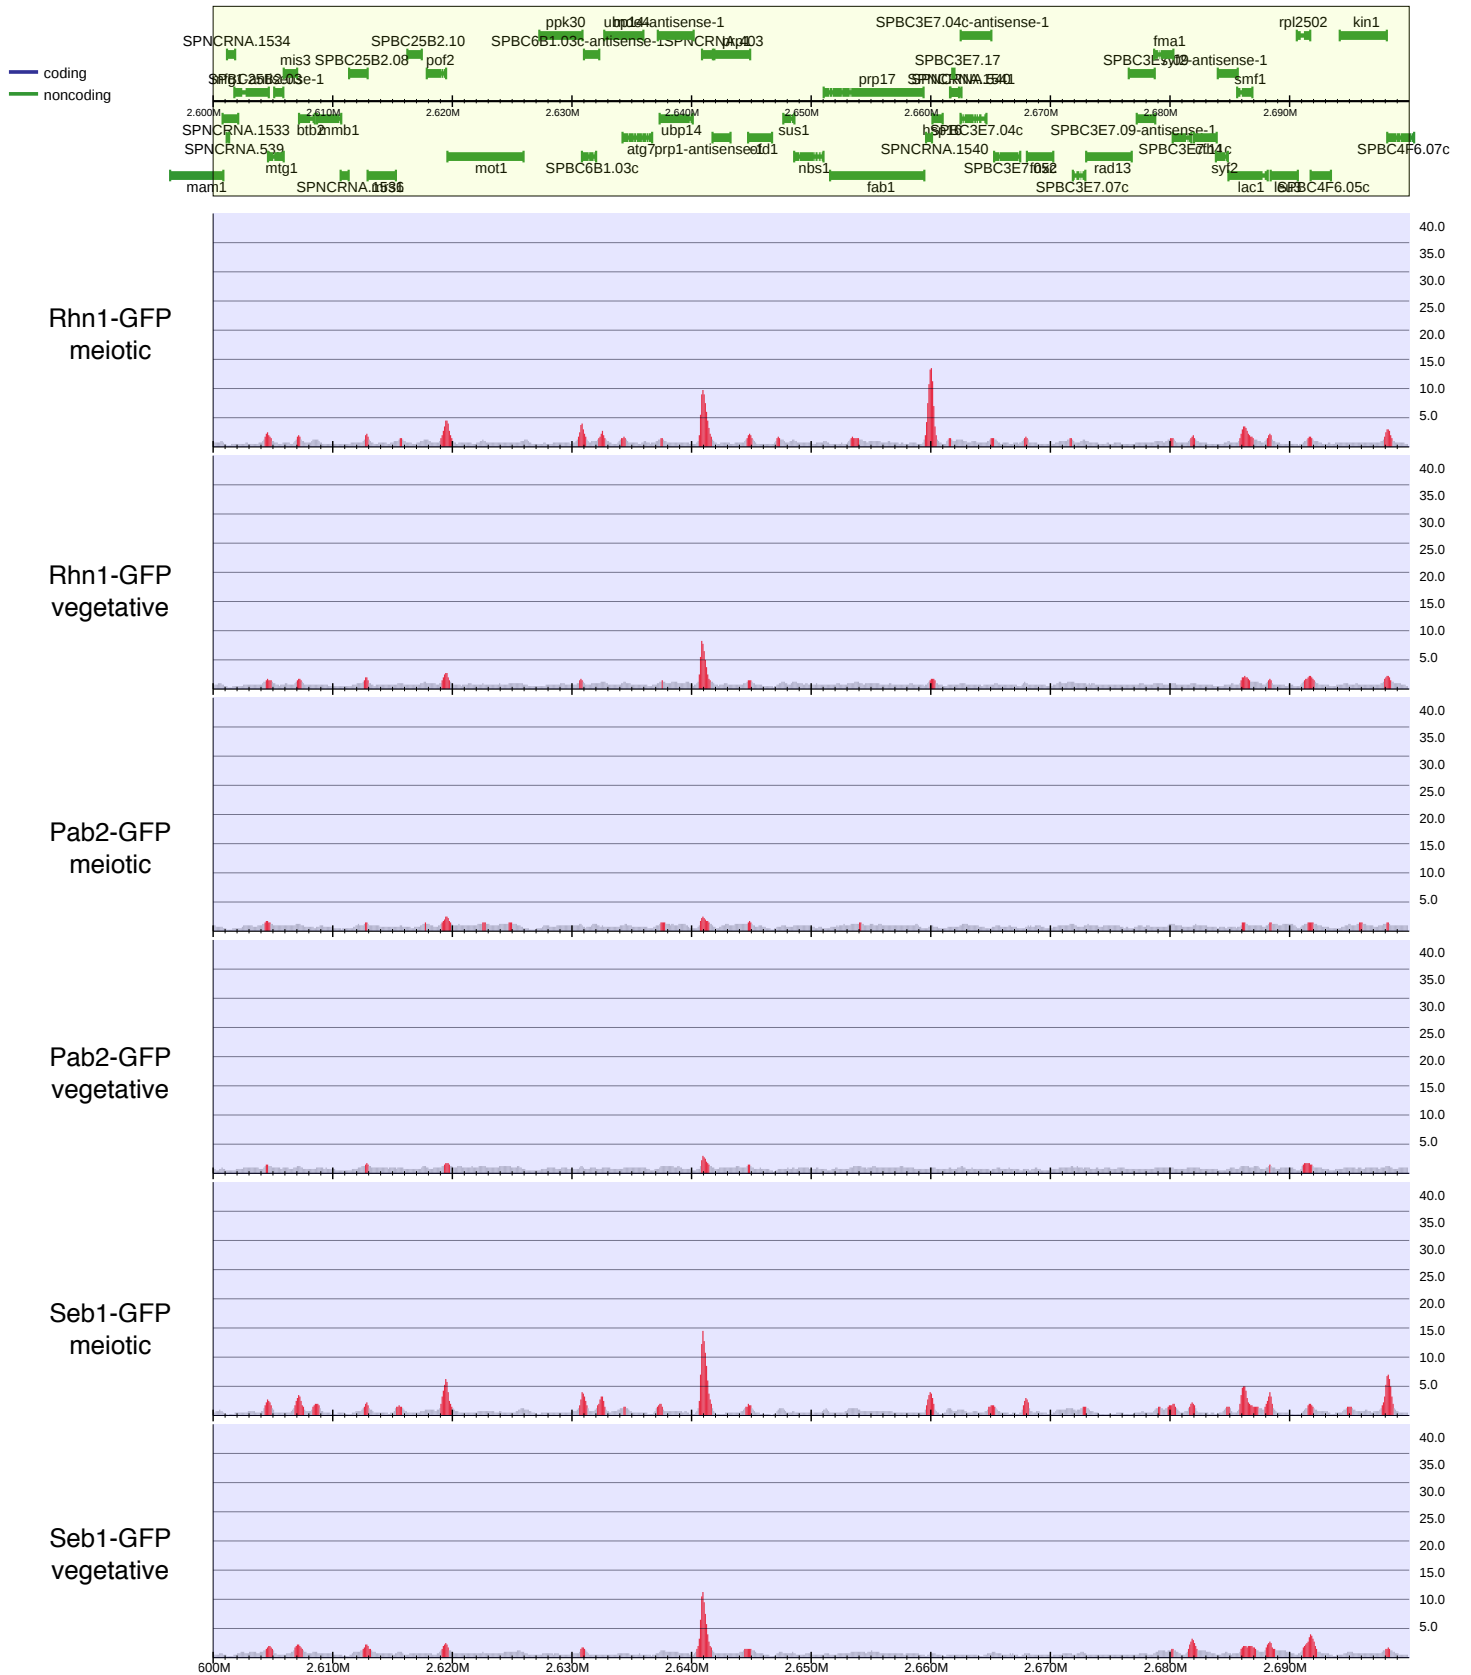





II\_1\_29

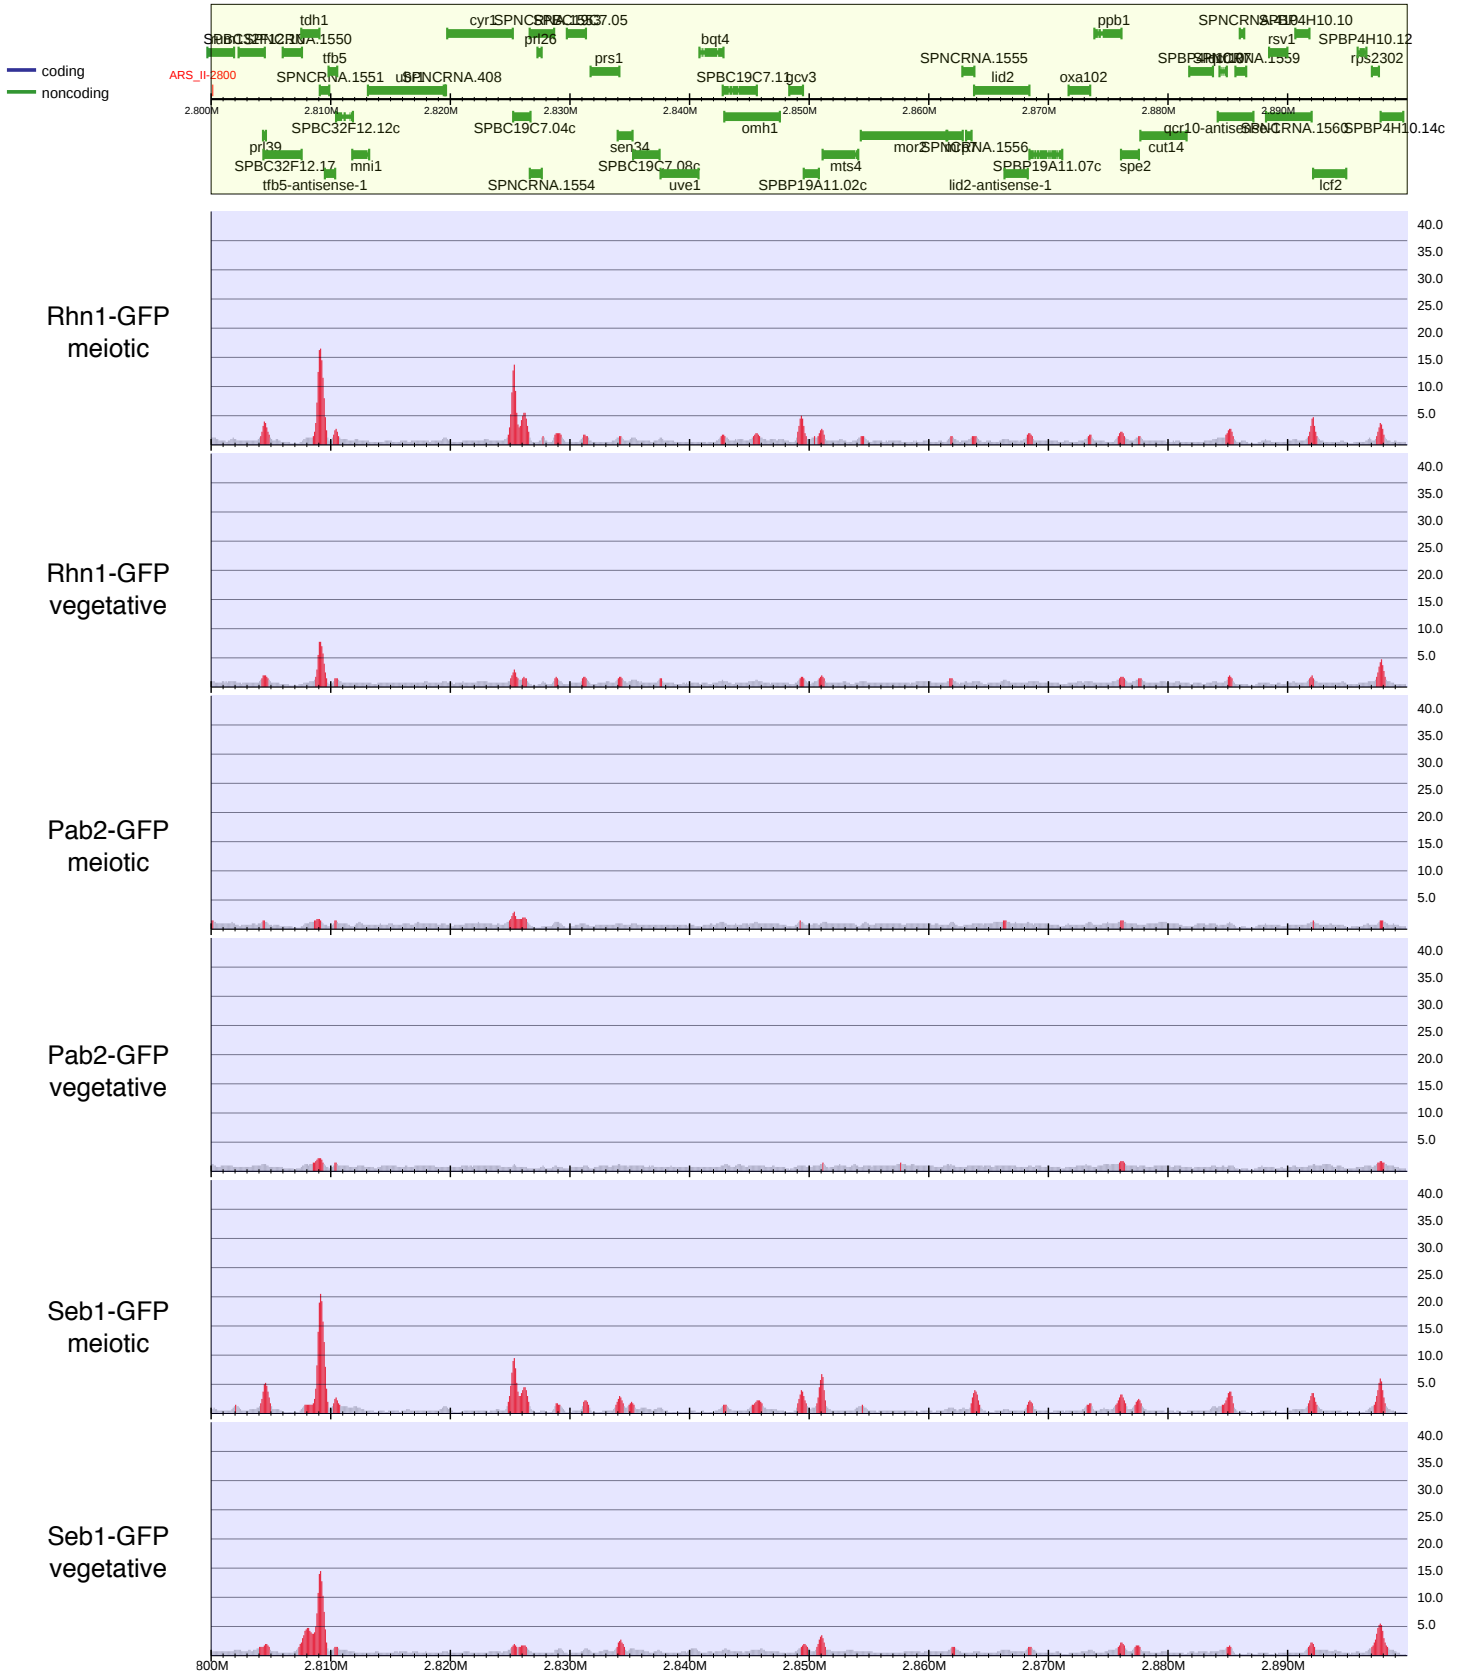

II\_1\_30

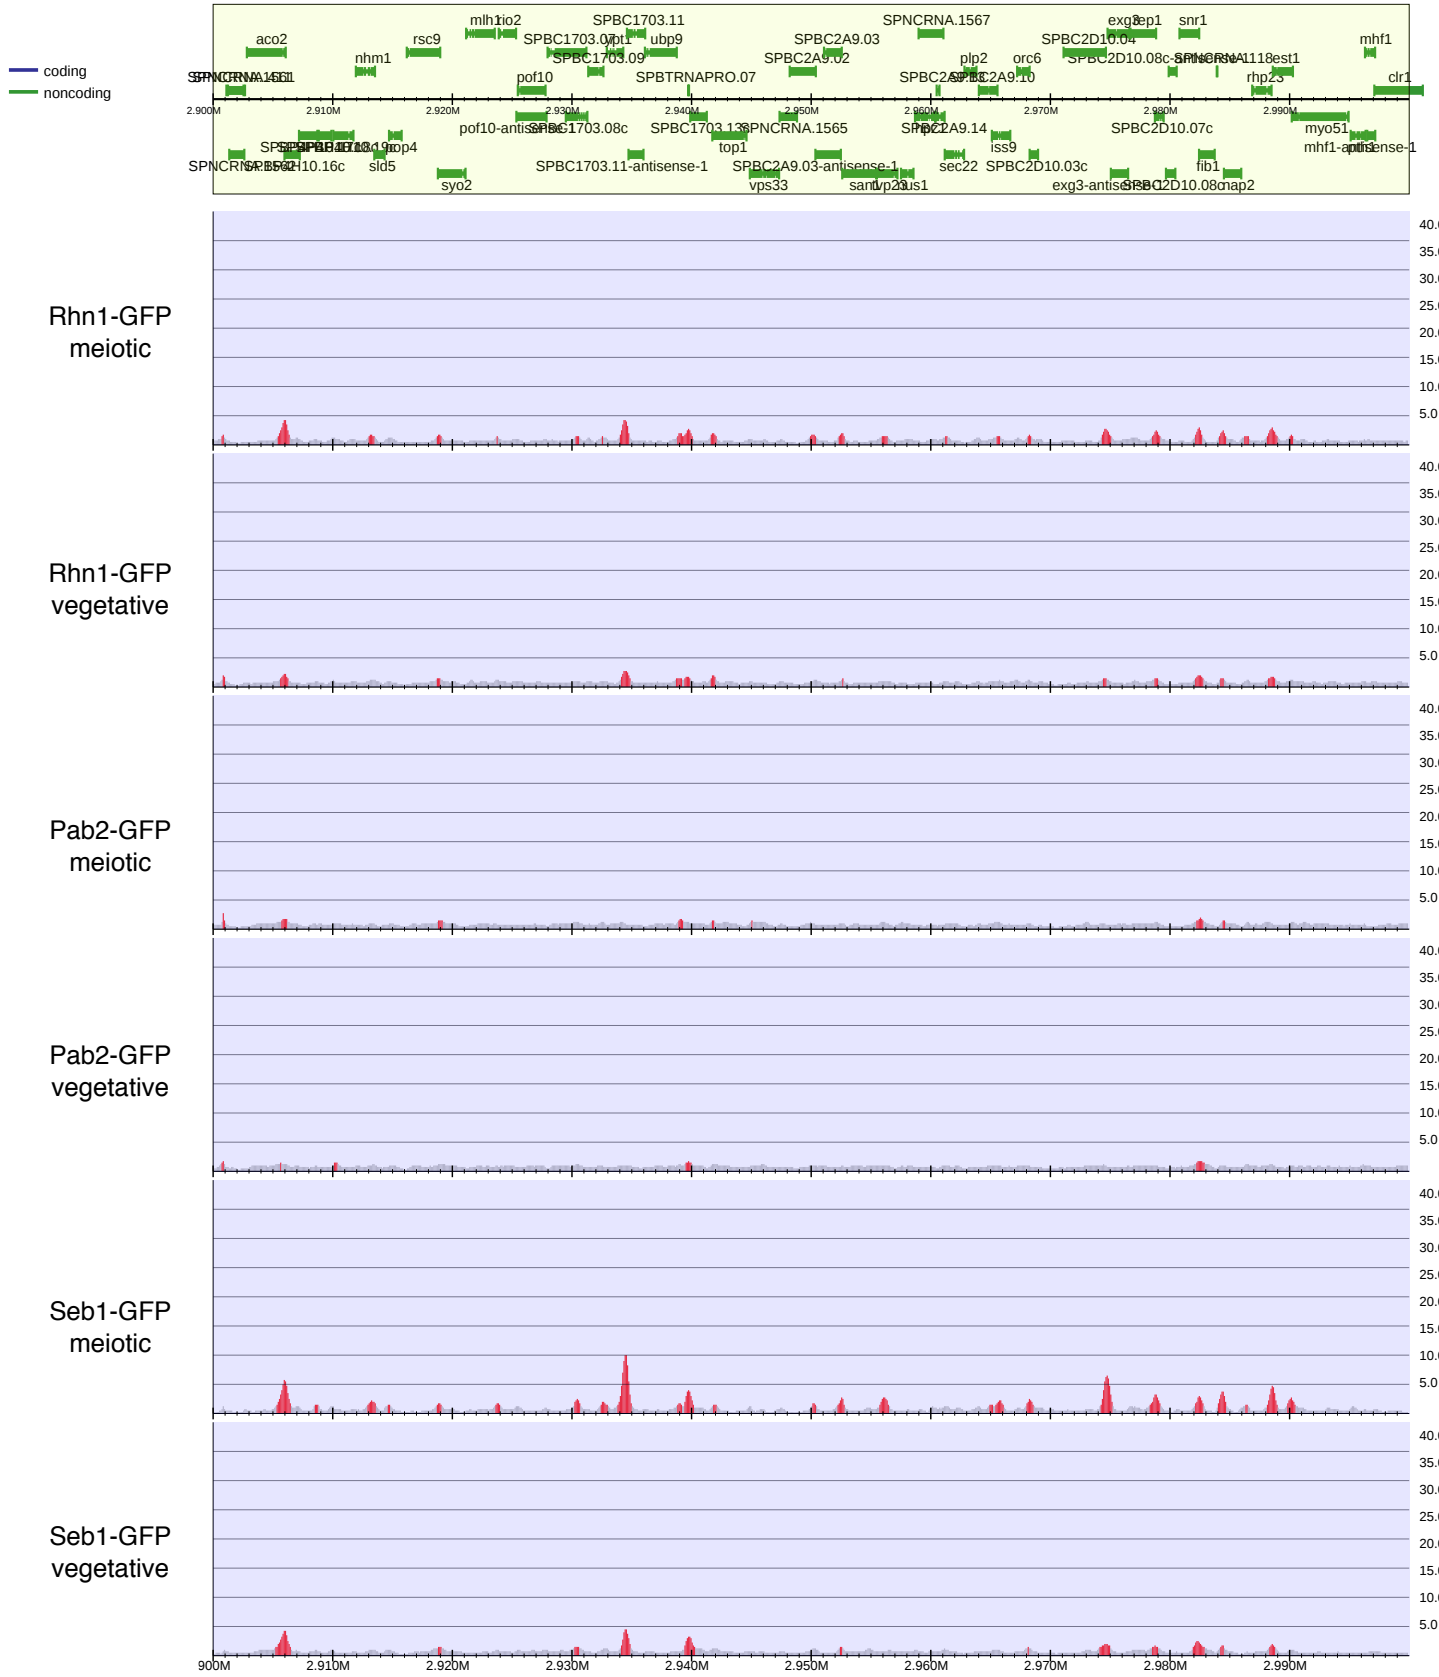



II\_1\_32

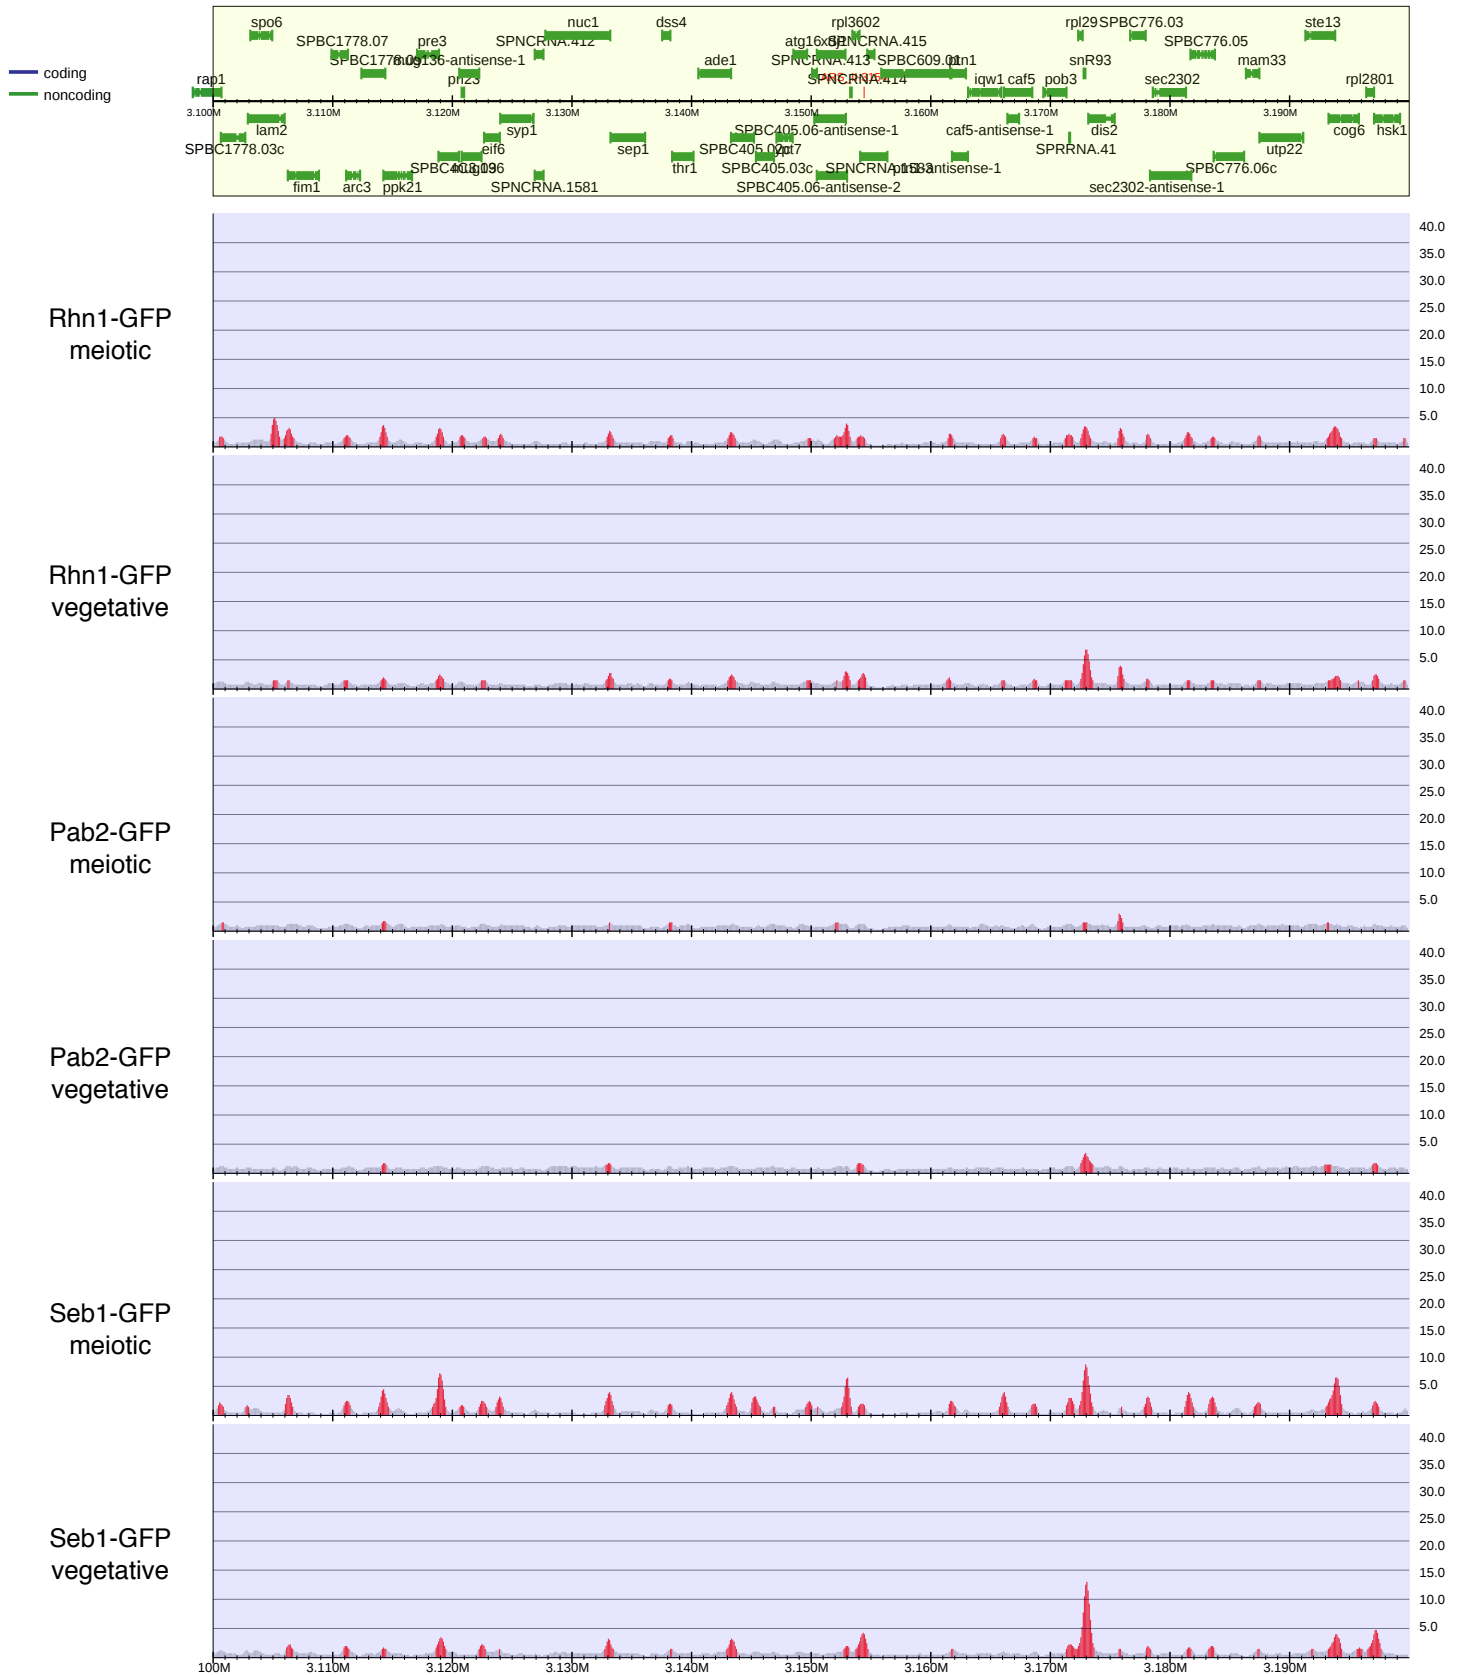

II\_1\_33

— coding  
— noncoding

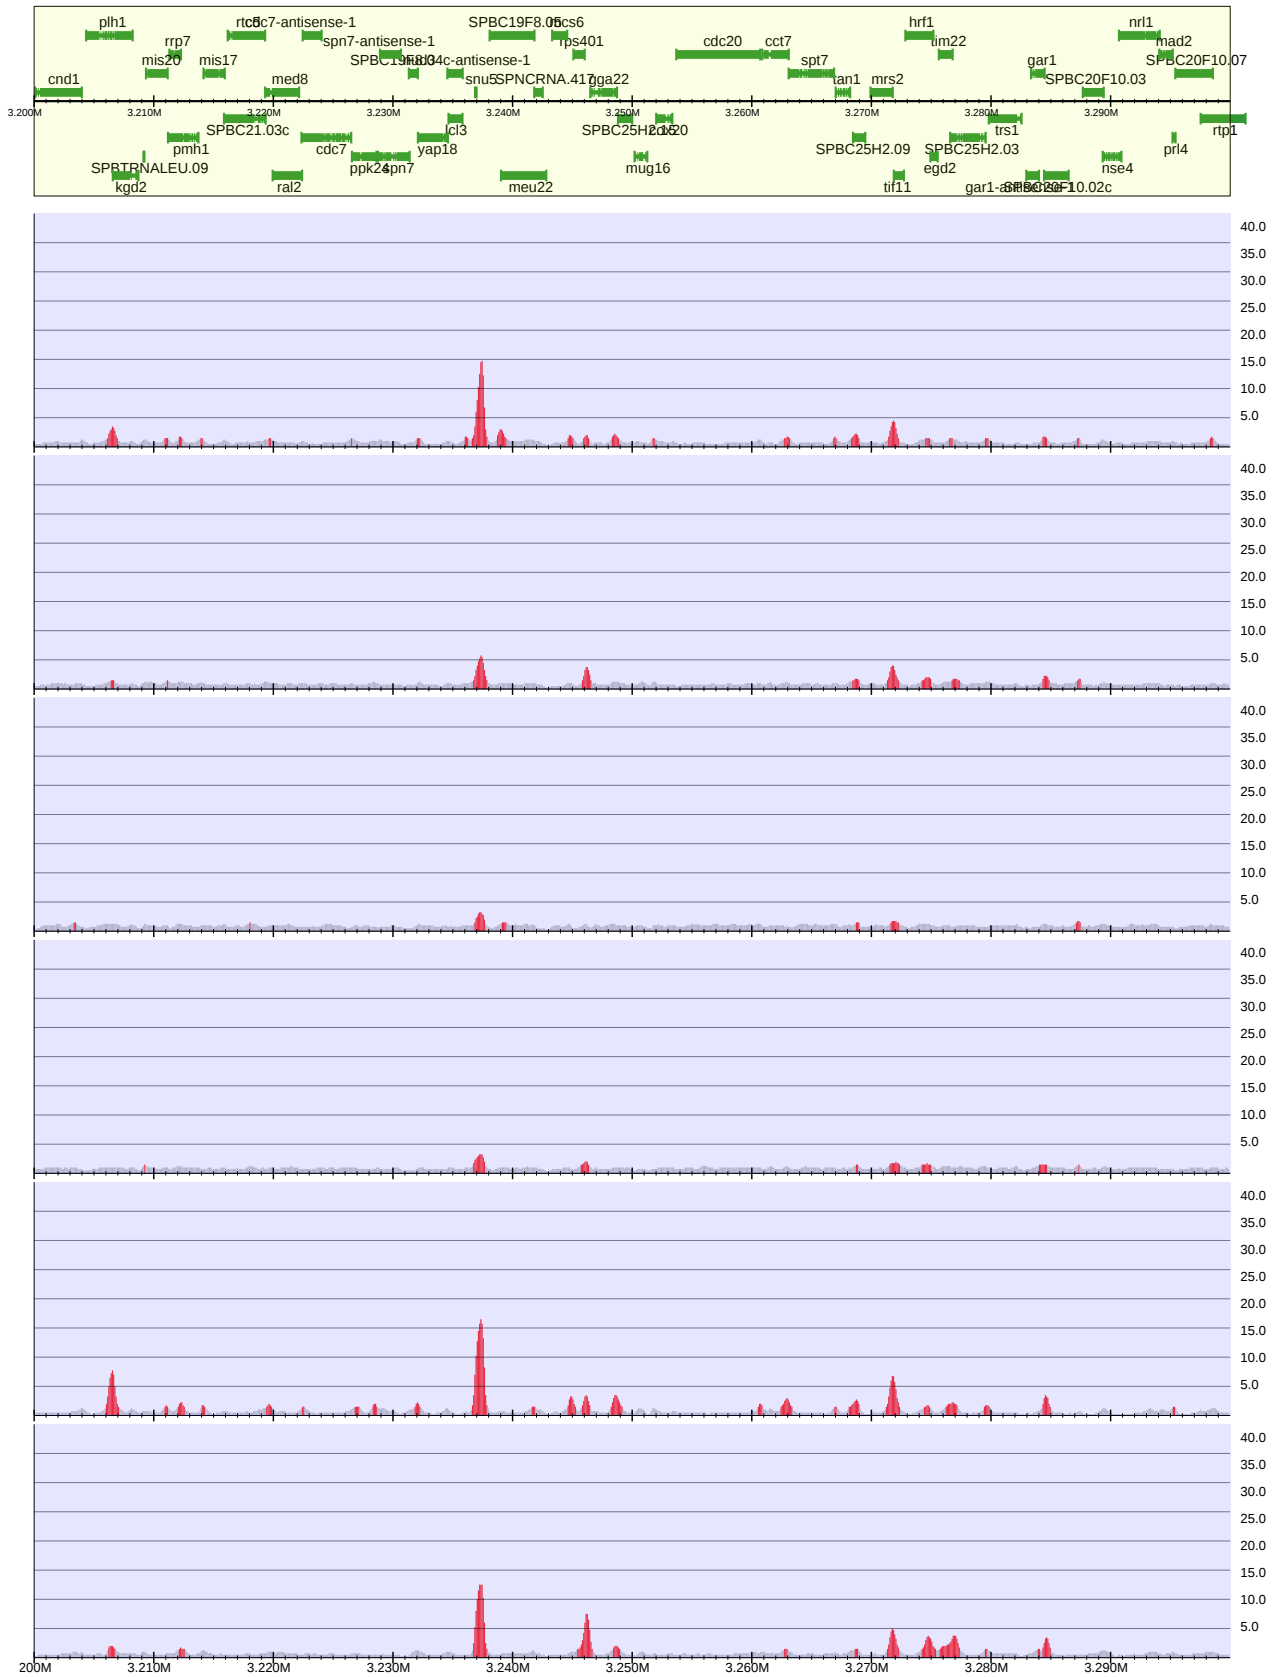

II\_1\_34

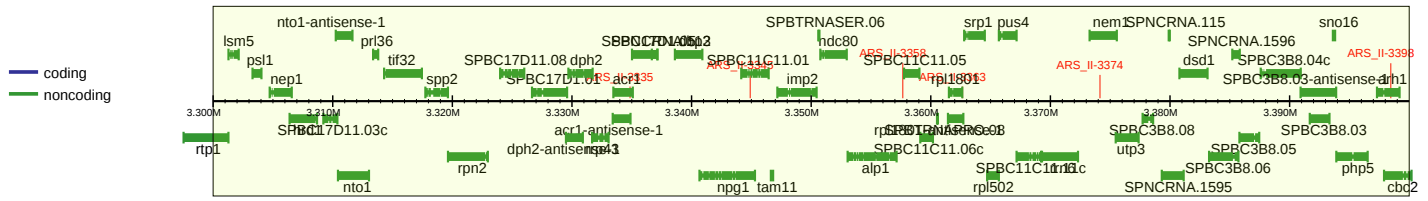

Rhn1-GFP  
meiotic

Rhn1-GFP  
vegetative

Pab2-GFP  
meiotic

Pab2-GFP  
vegetative

Seb1-GFP  
meiotic

Seb1-GFP  
vegetative

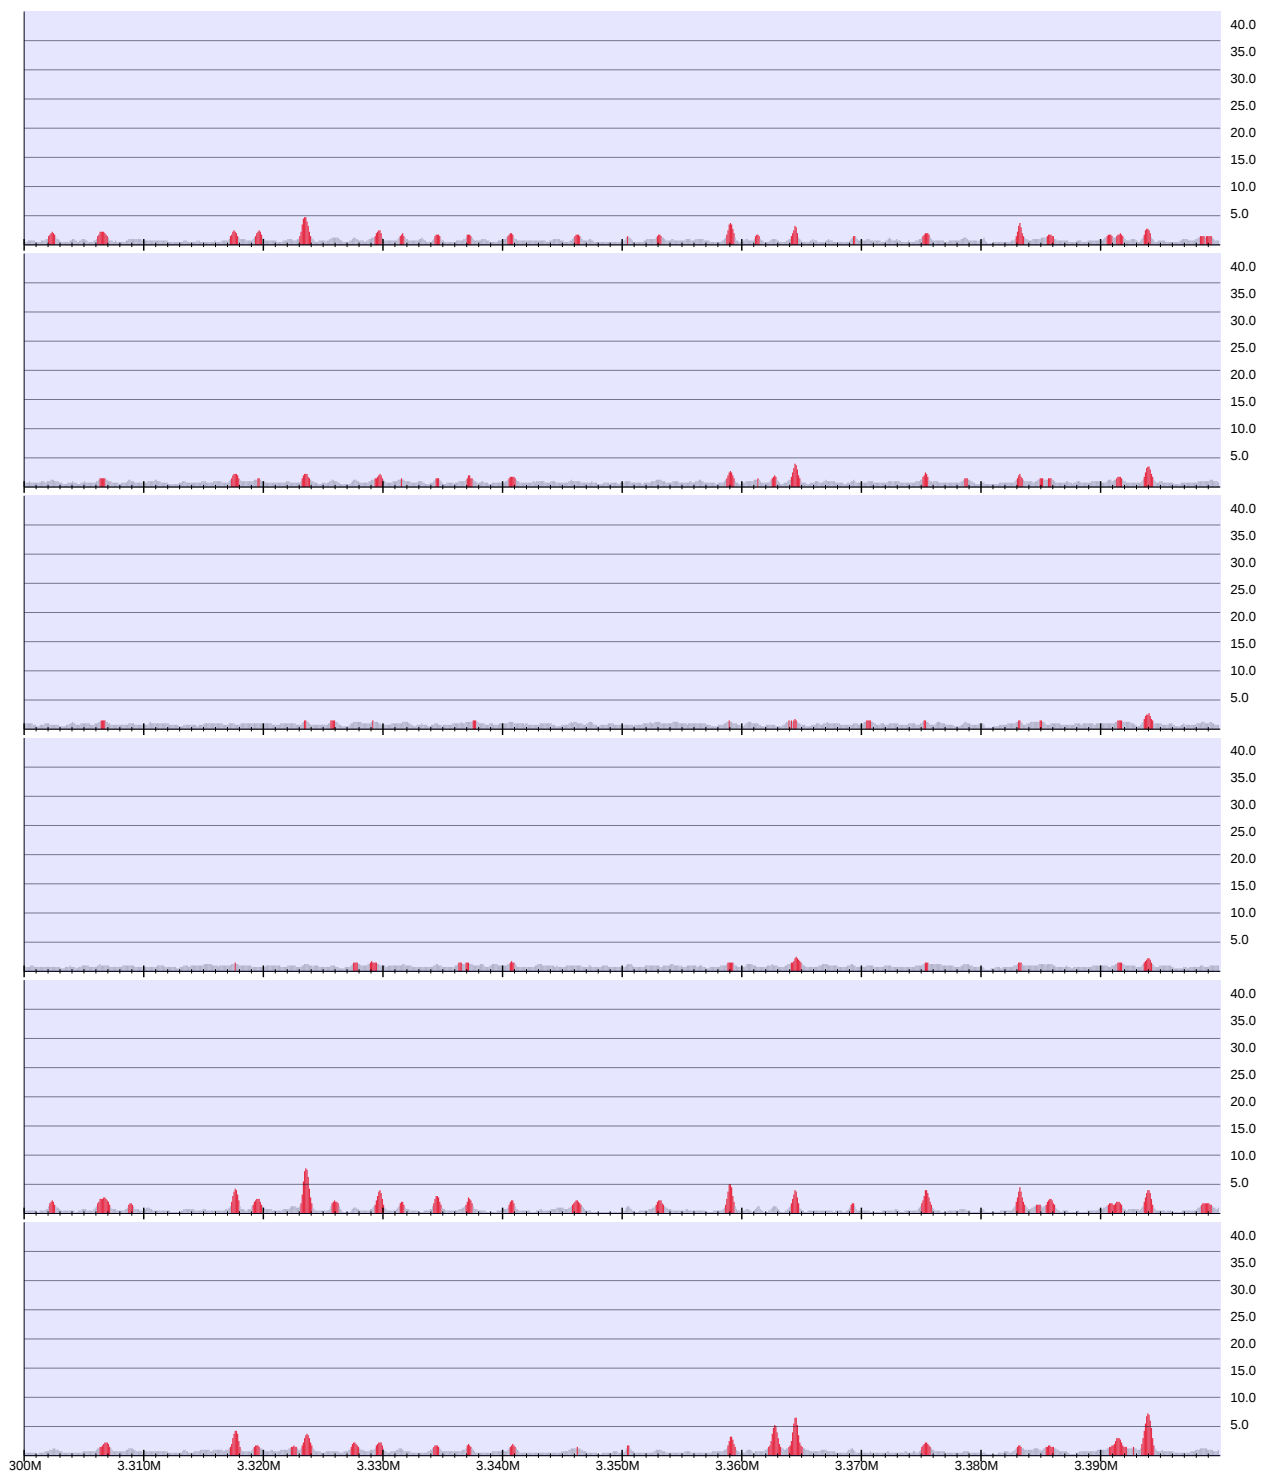

II\_1\_35

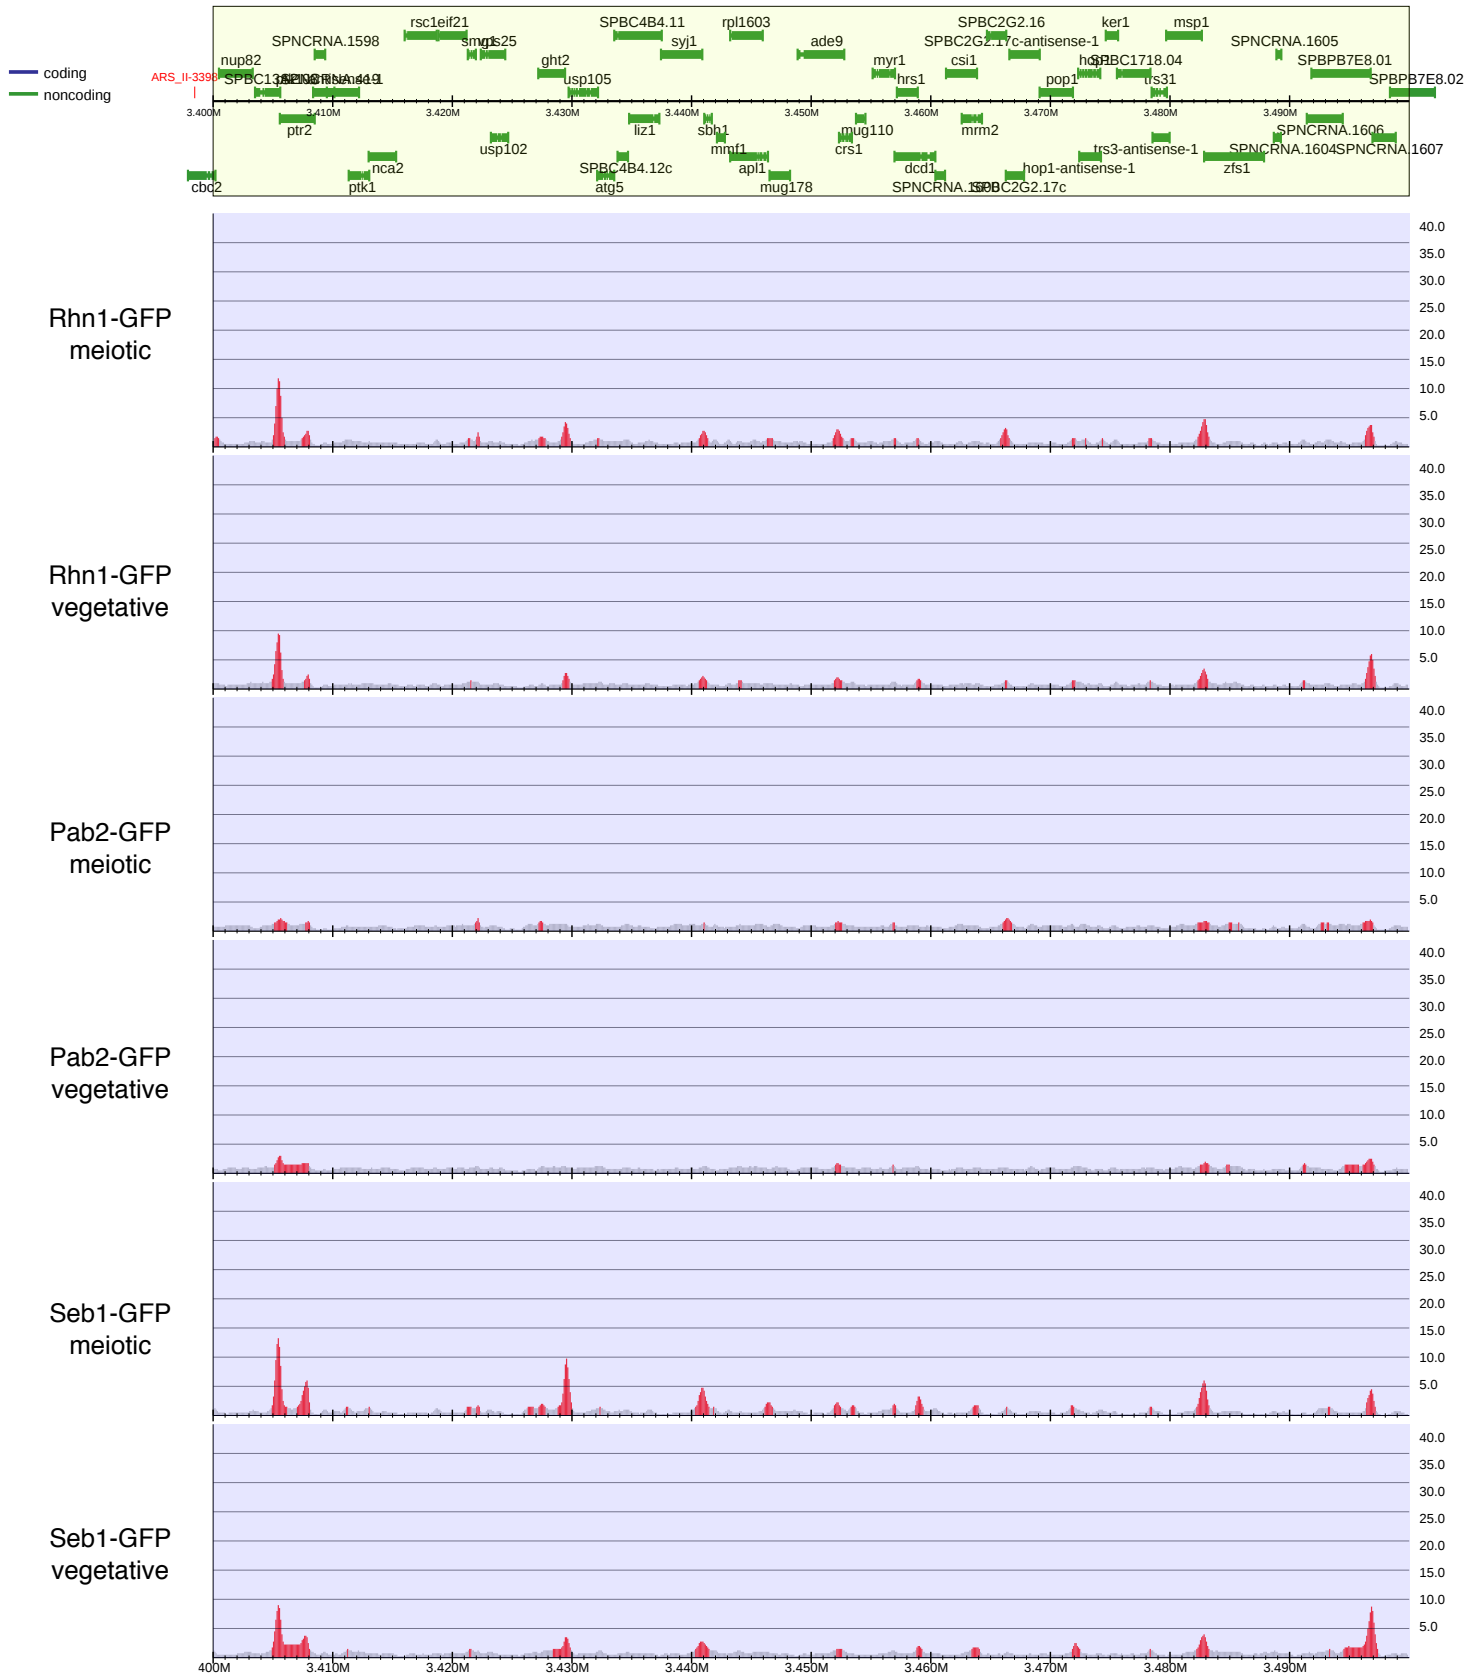

II\_1\_36

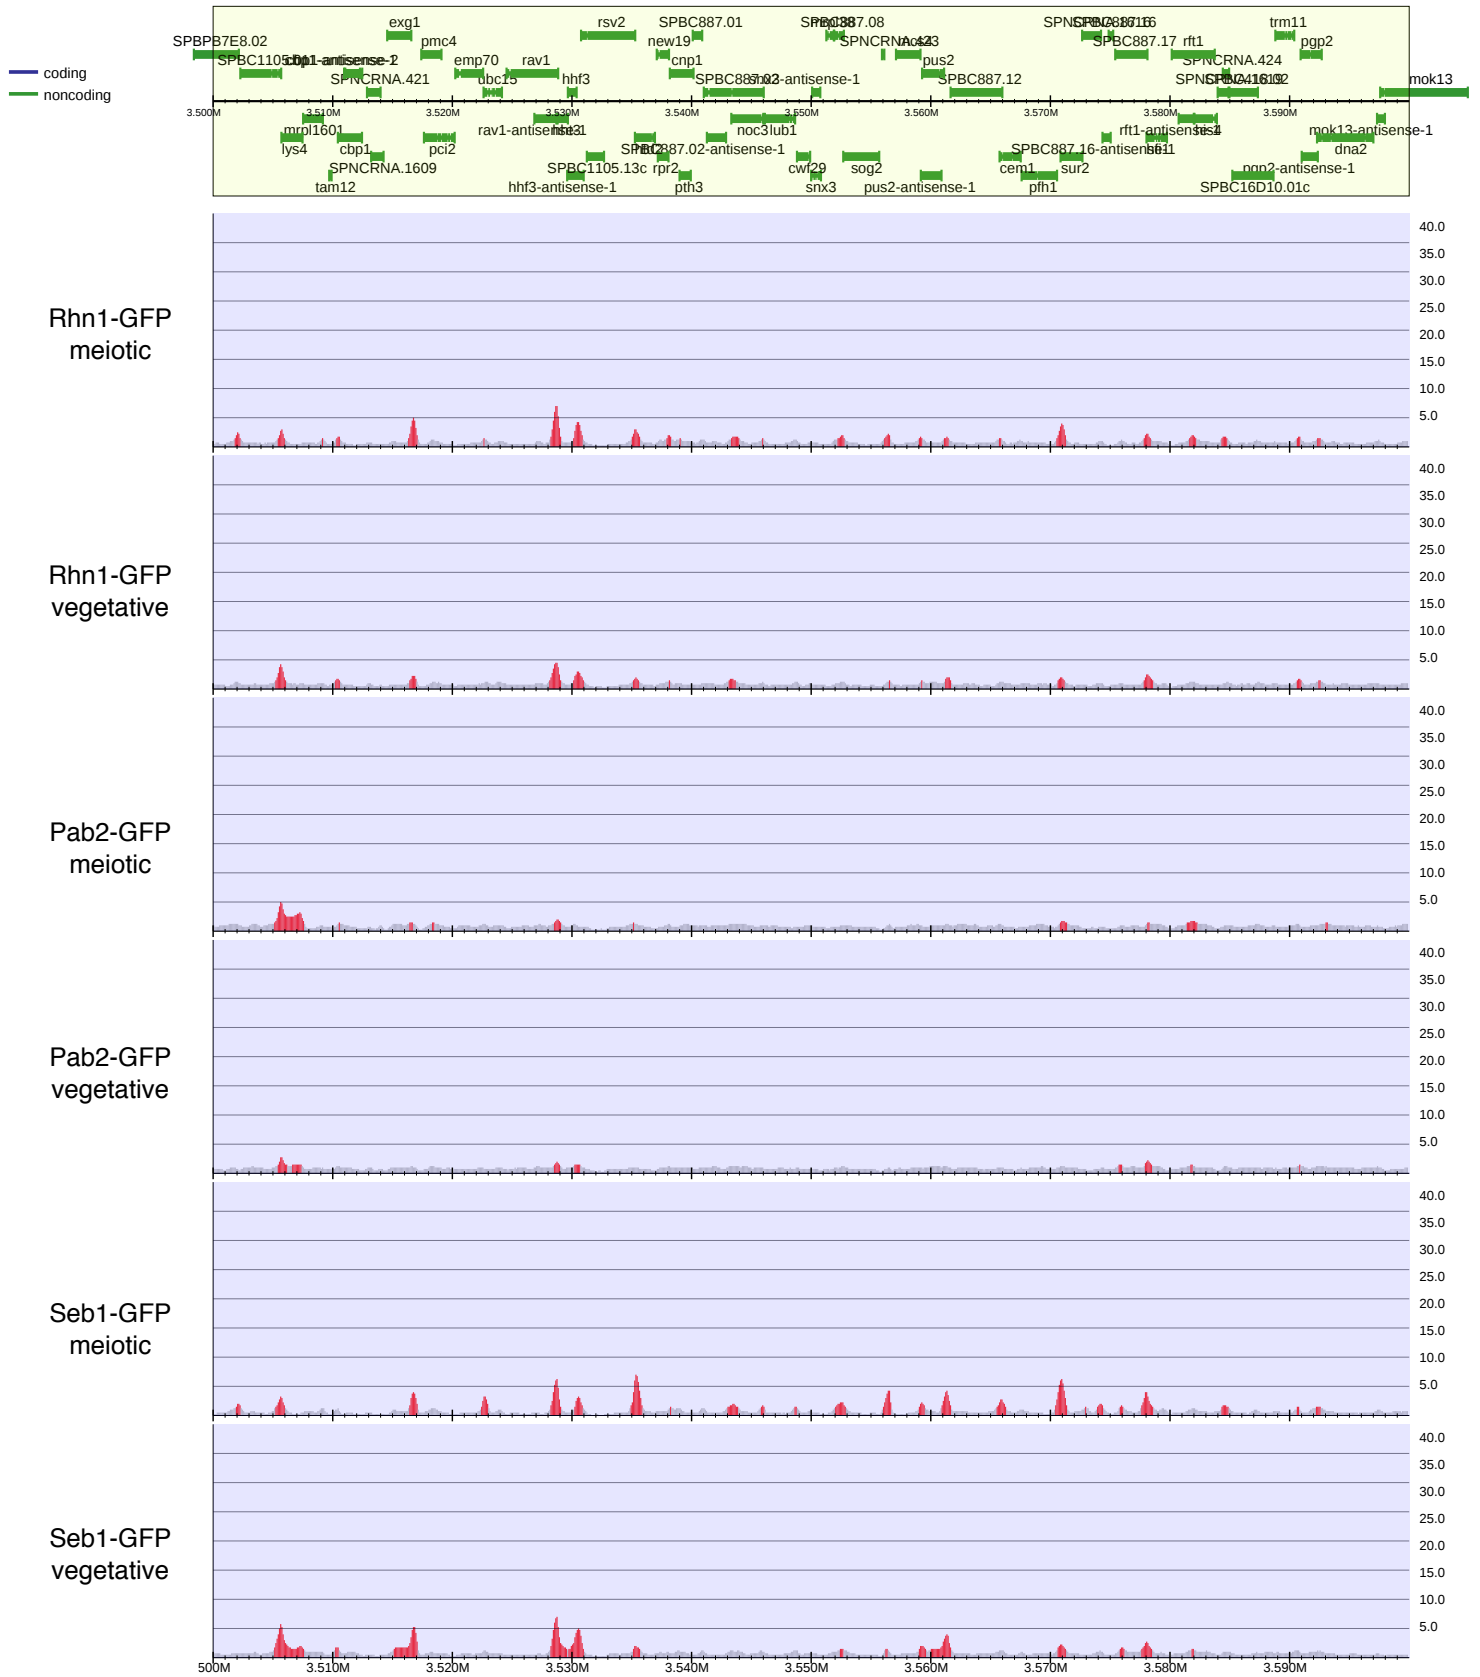



II\_1\_37

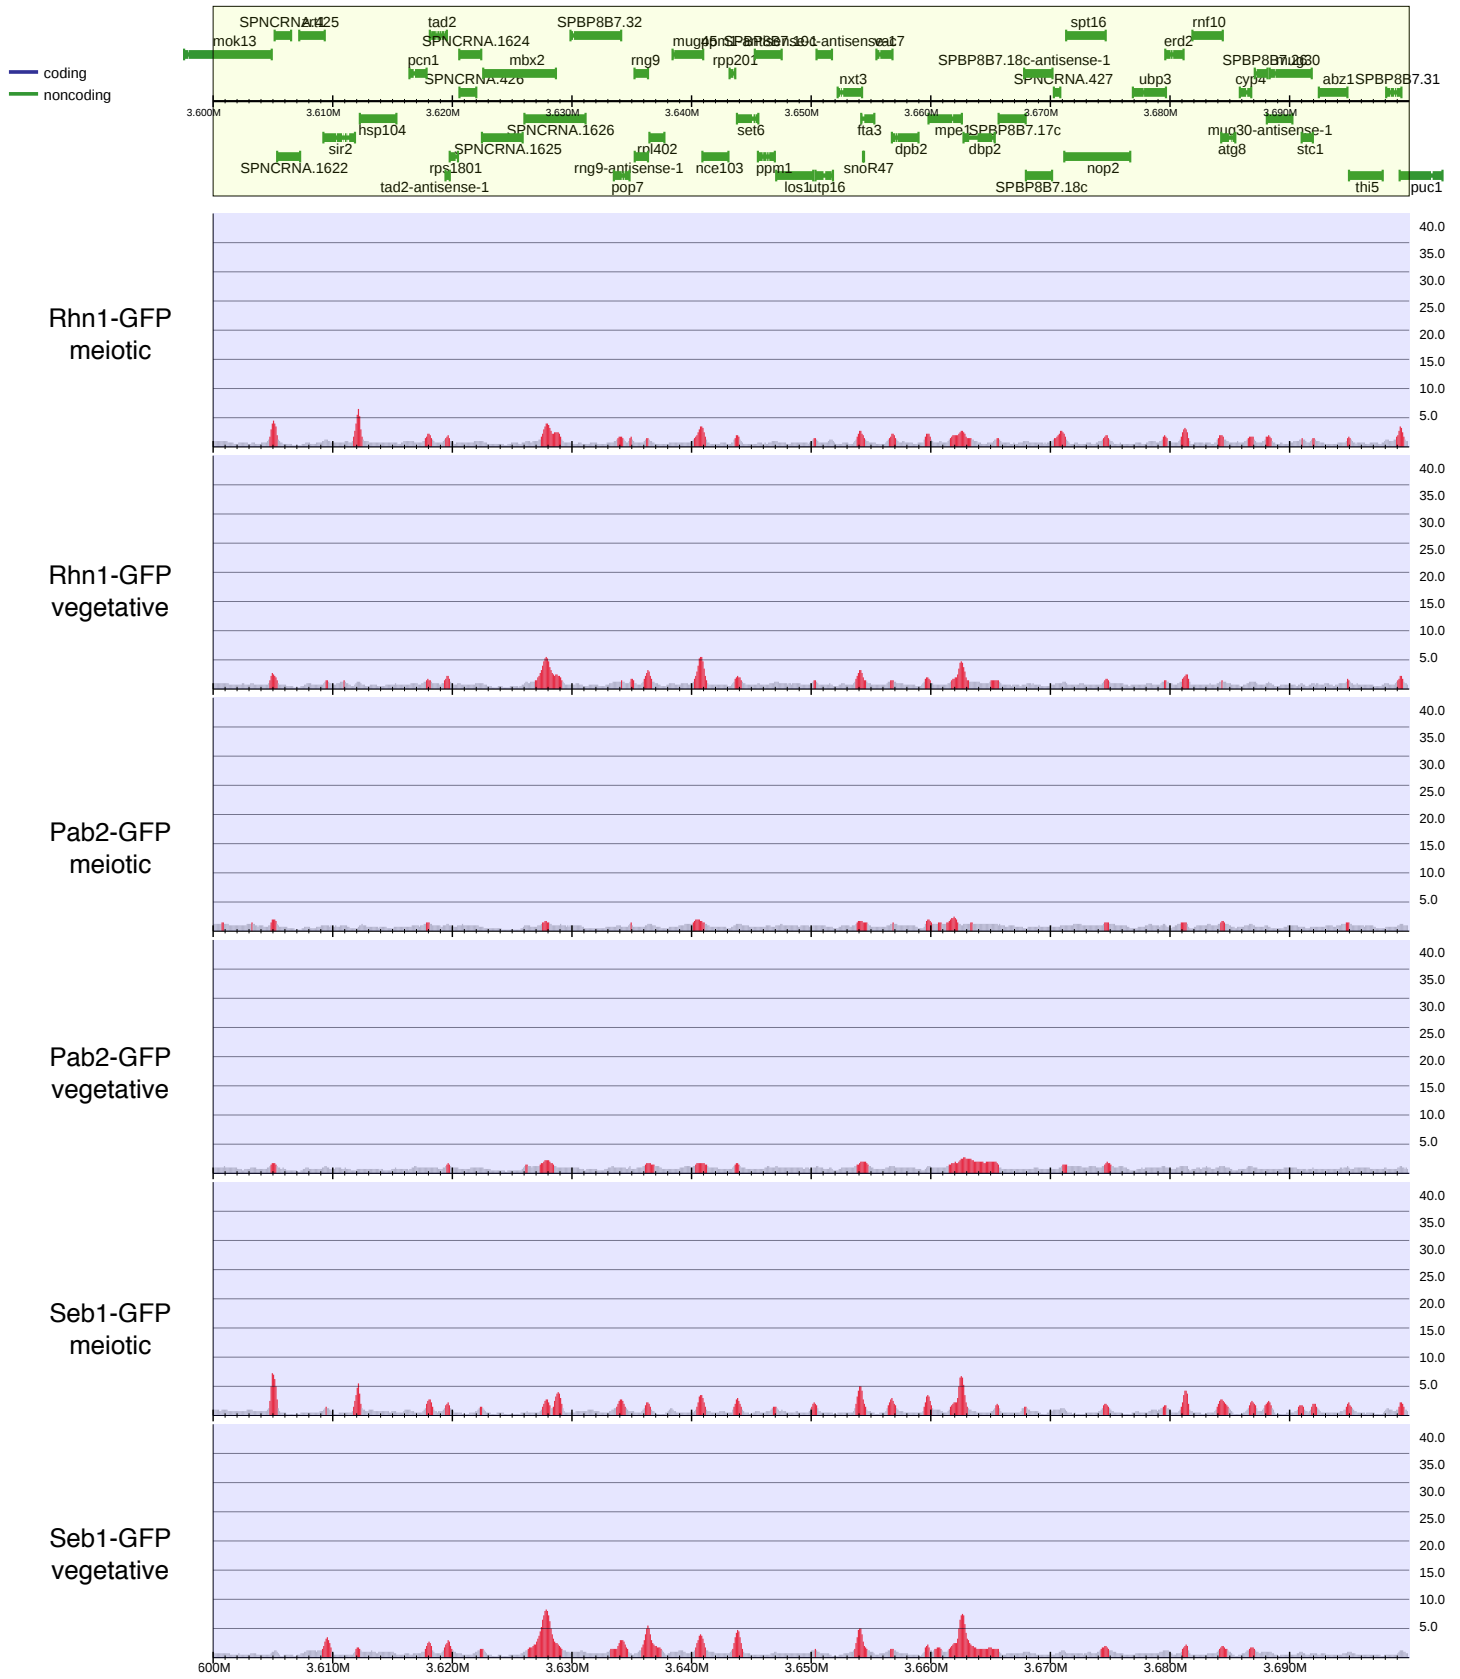

II\_1\_38

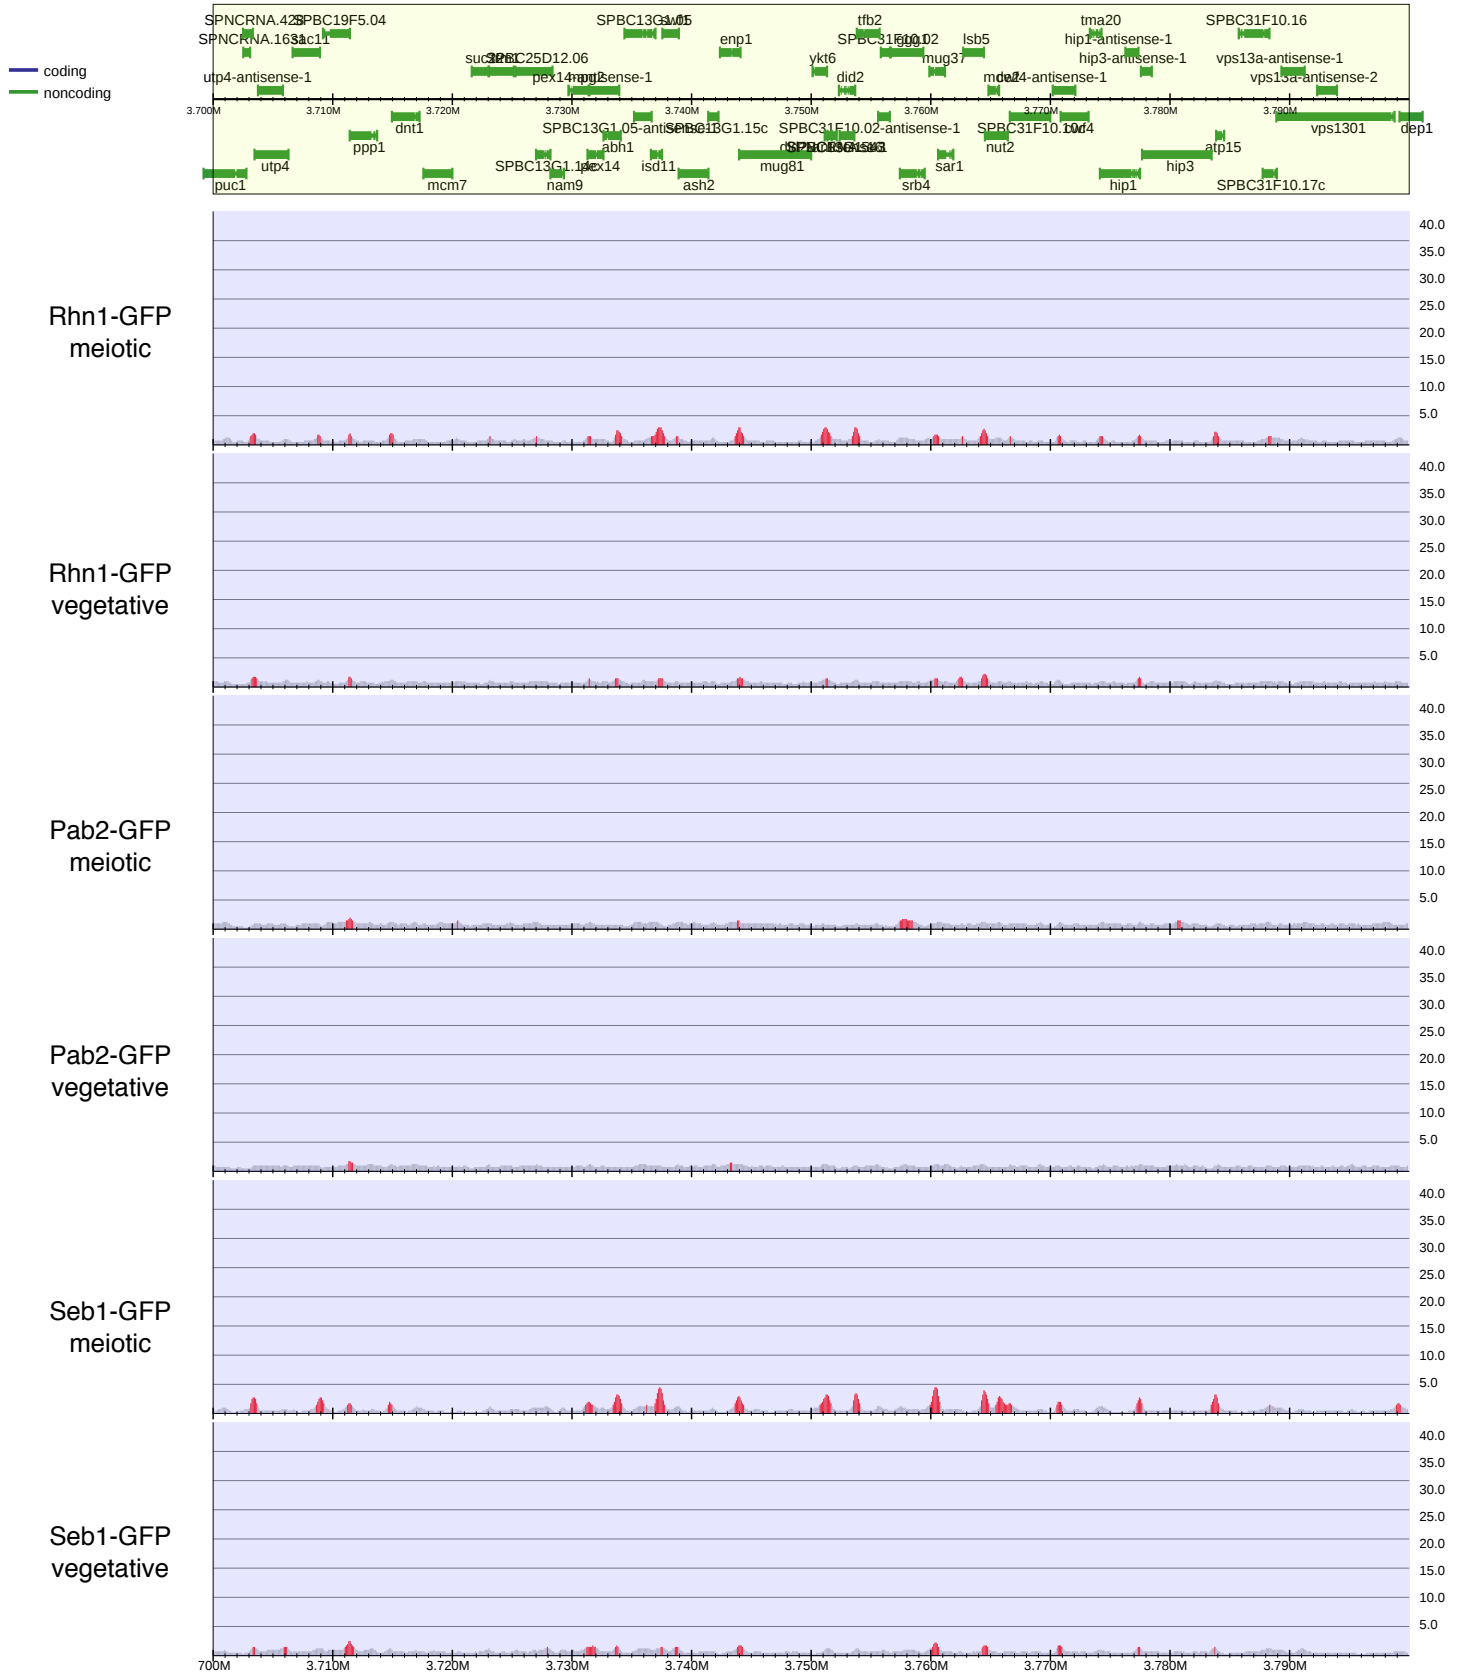



II\_1\_40

— coding  
— noncoding

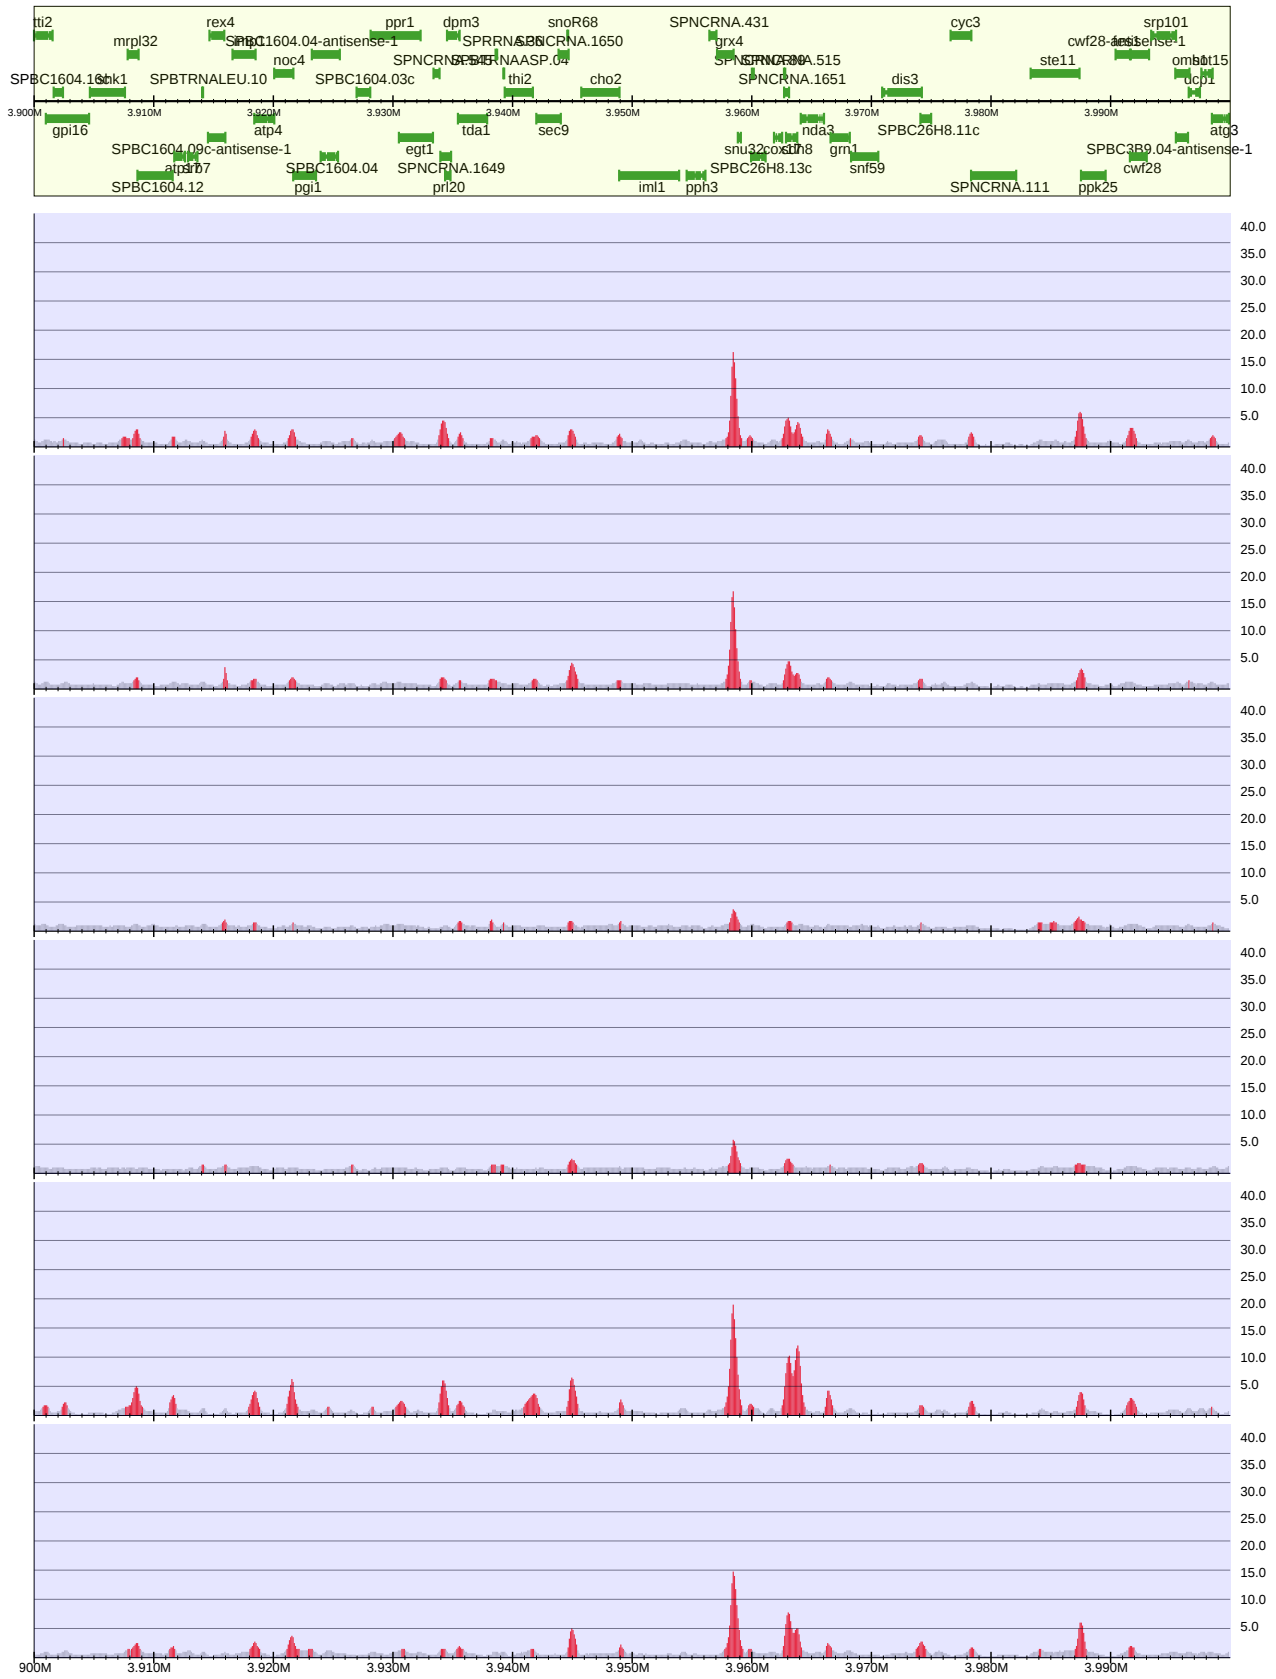







II\_1\_44

coding  
noncoding

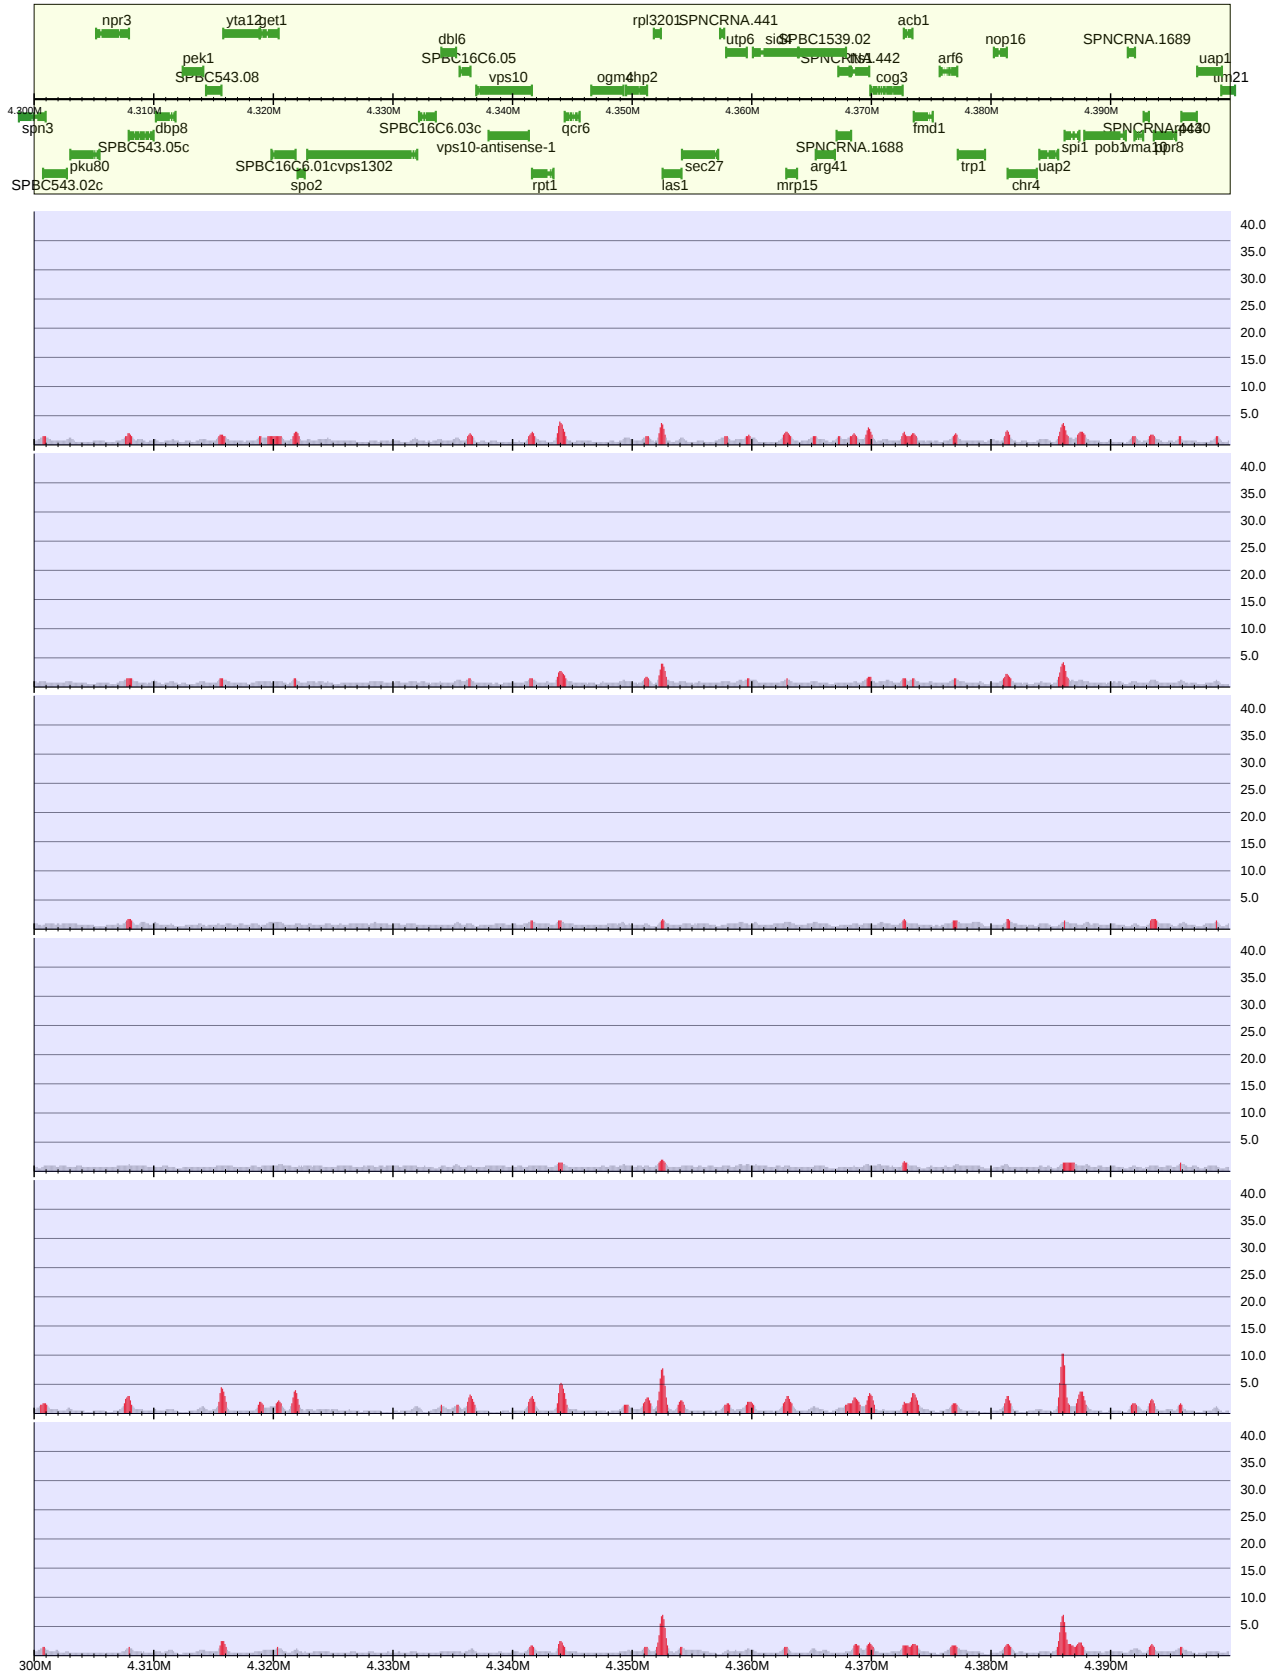





II\_1\_46

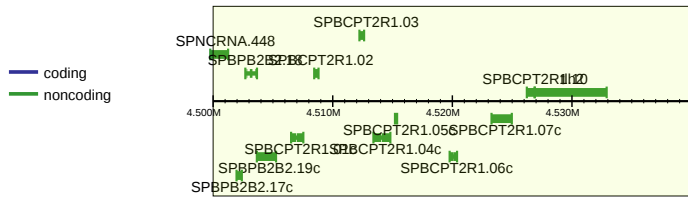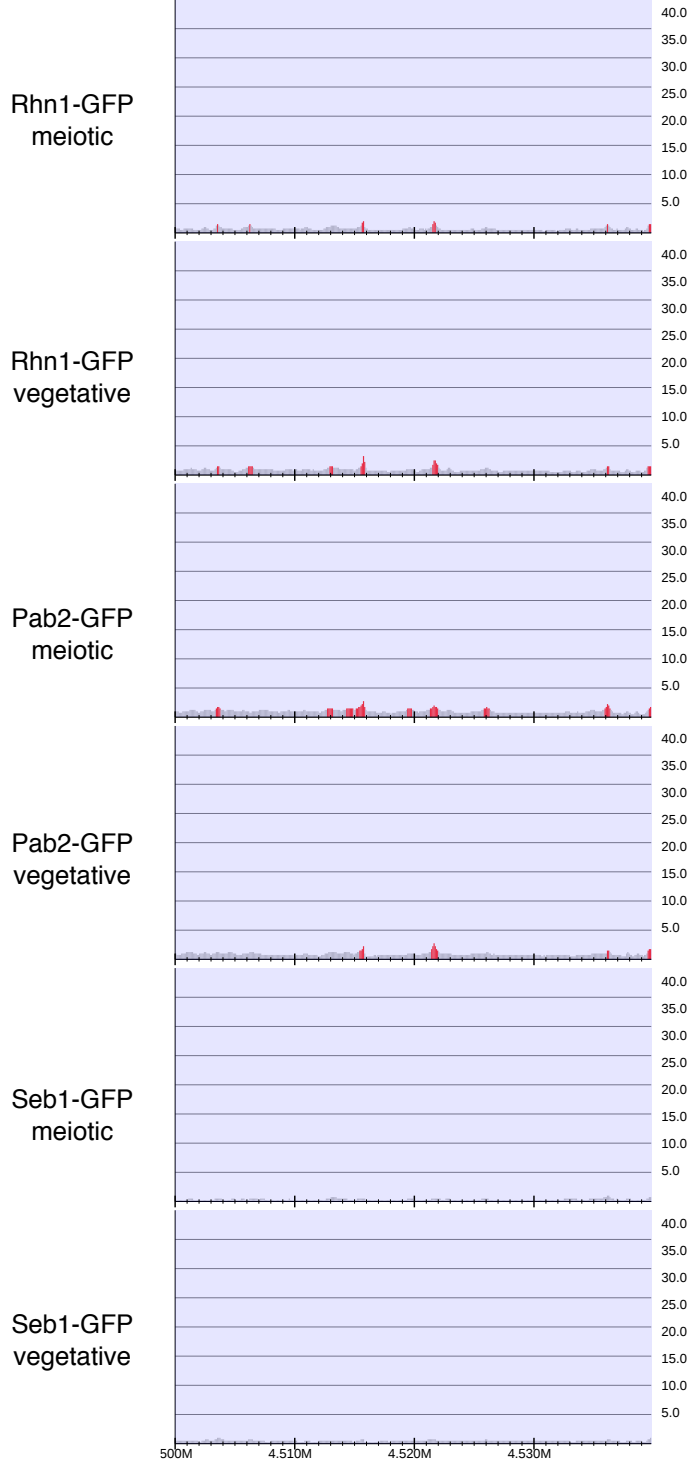



III\_1\_2

coding  
noncoding

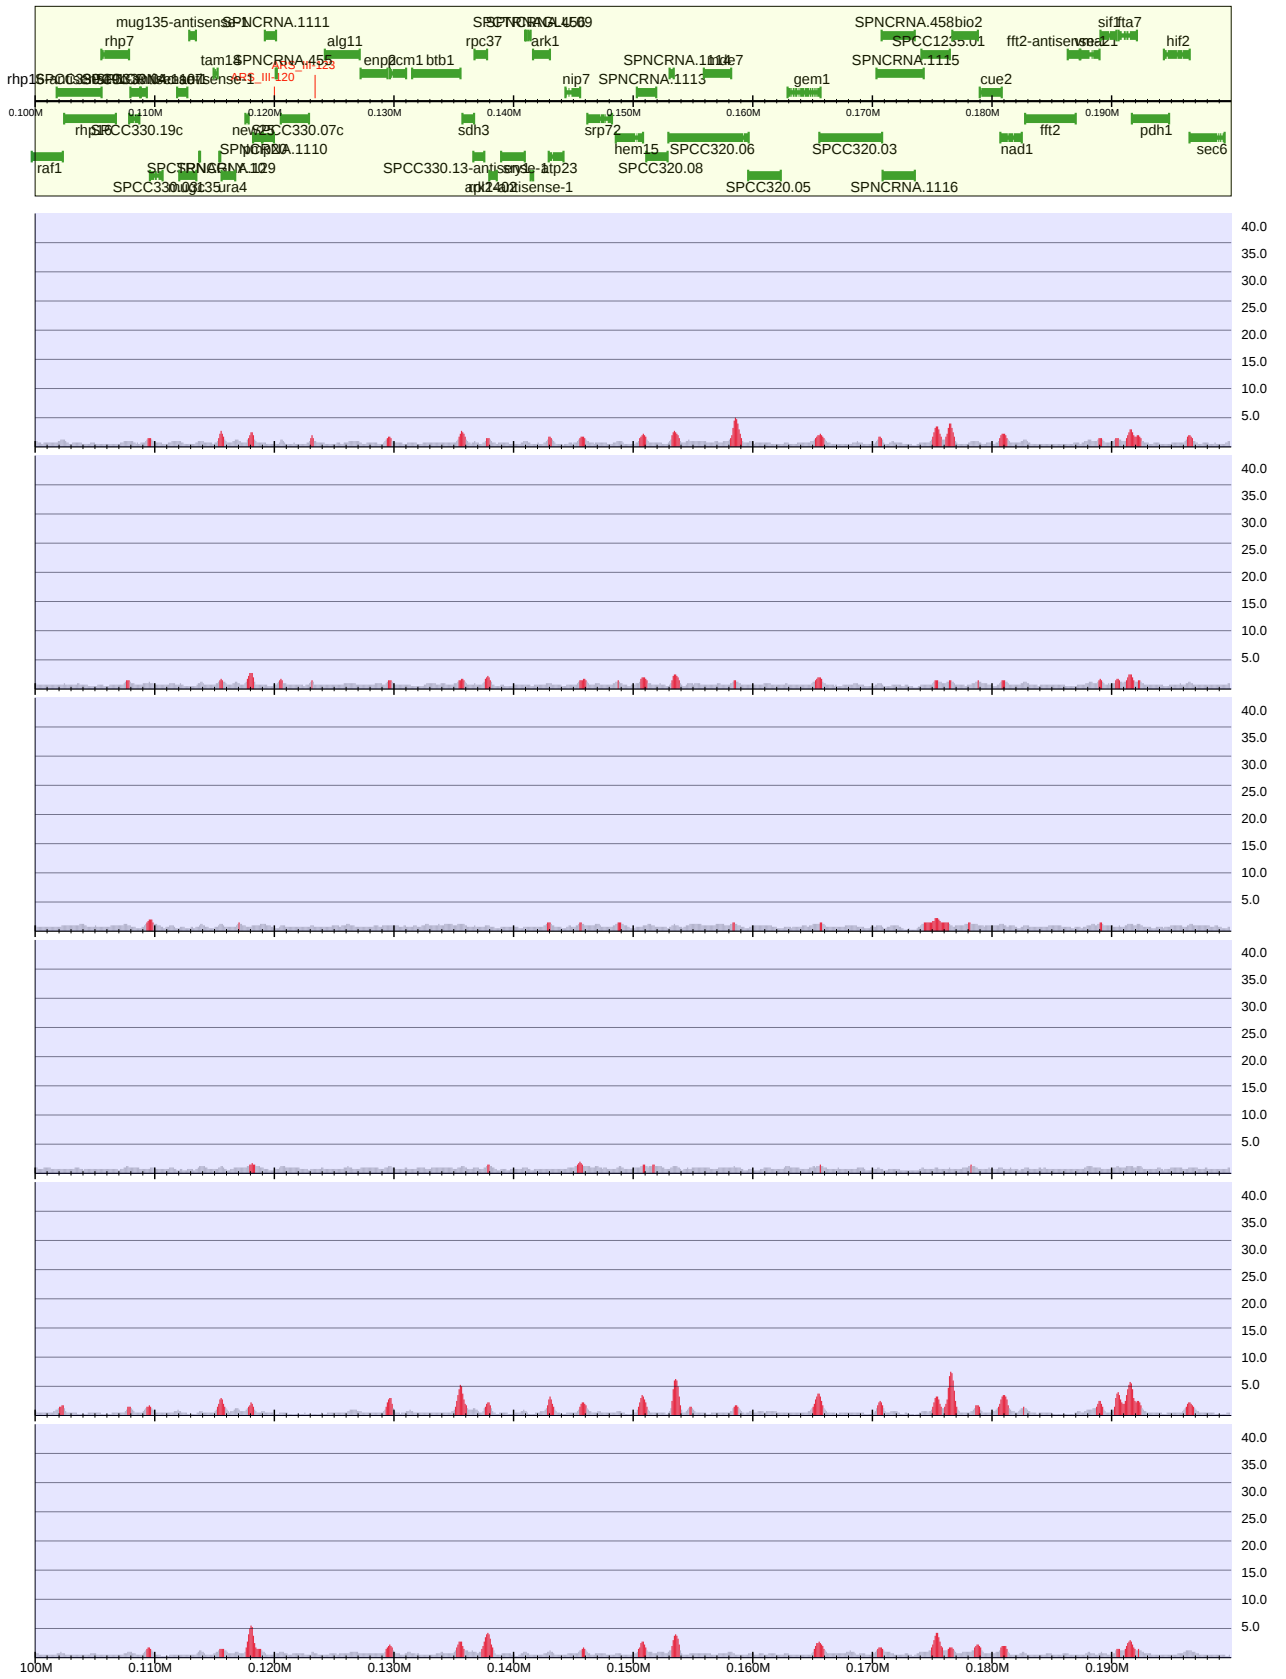

III\_1\_3

coding  
noncoding

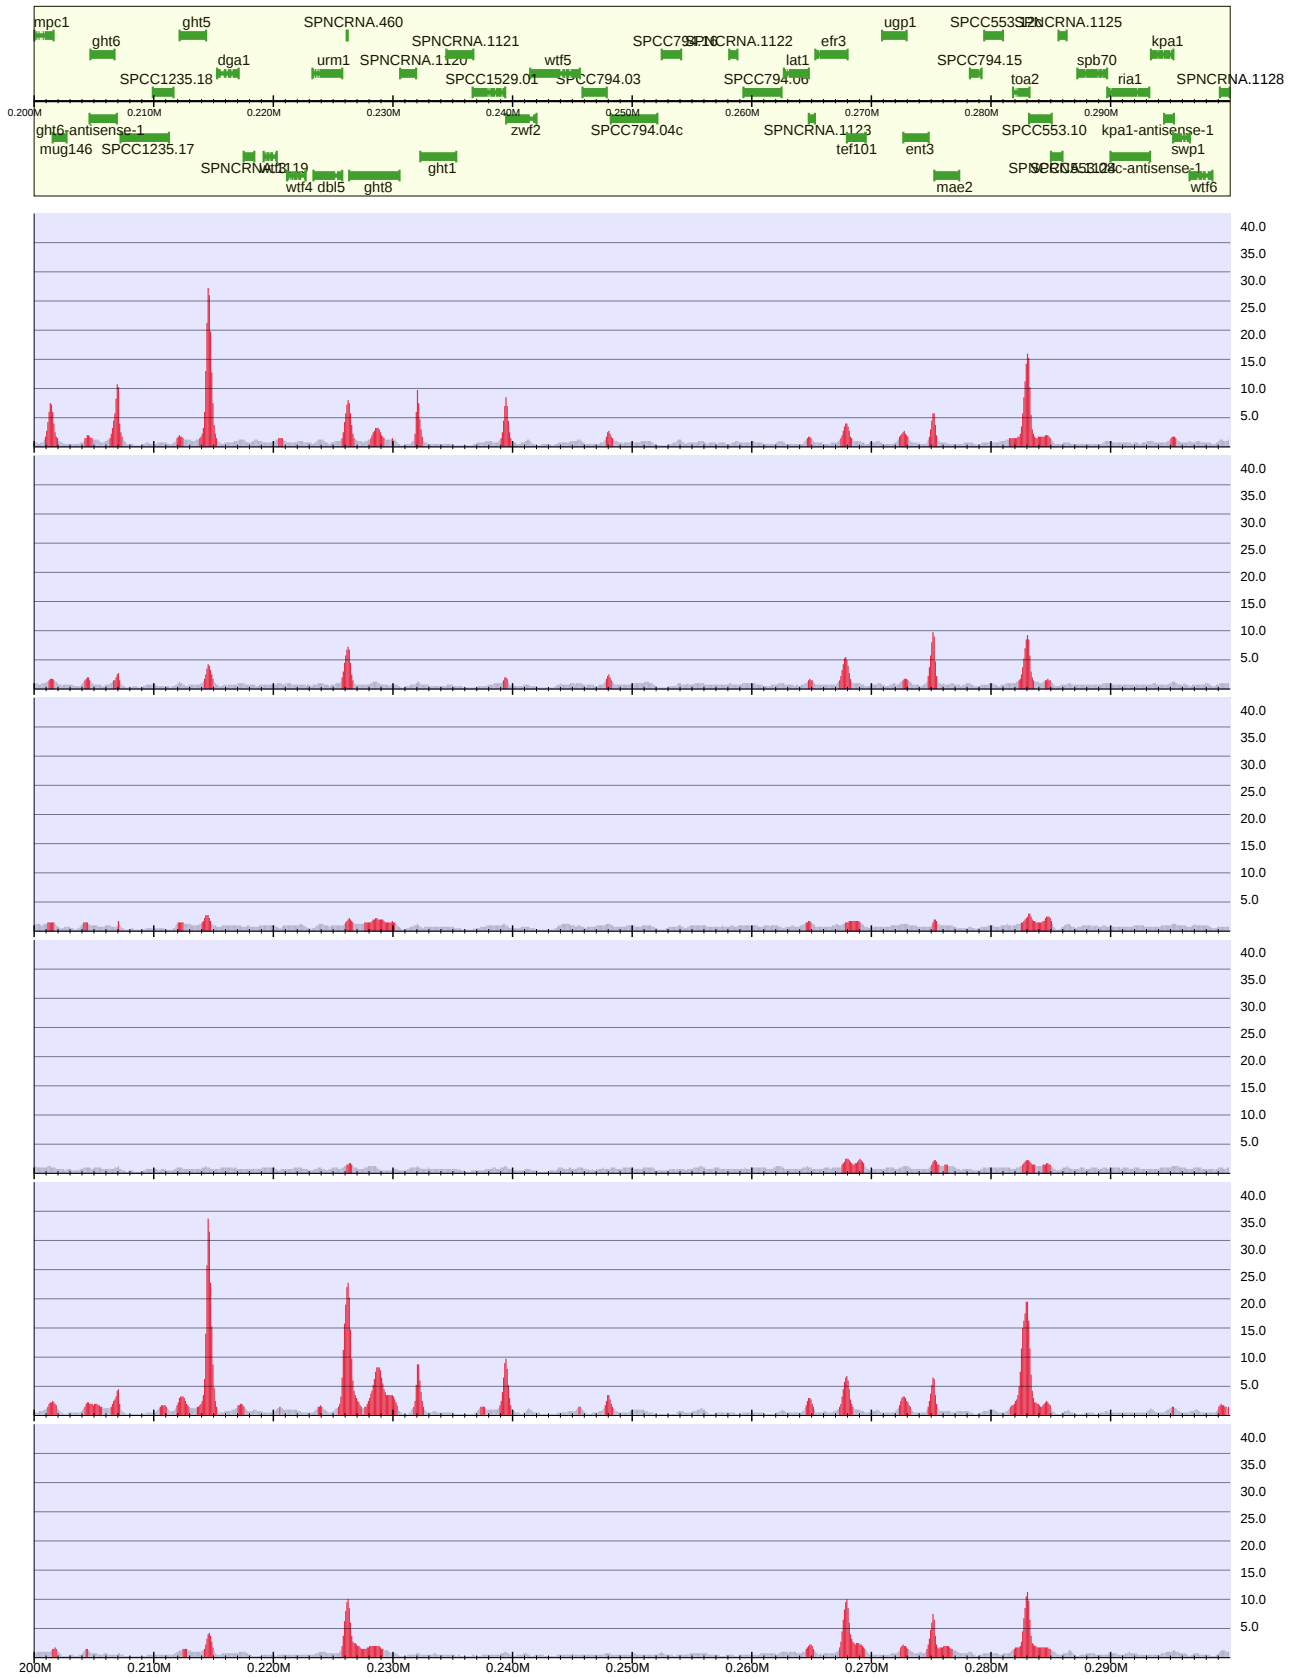

III\_1\_4

— coding  
— noncoding

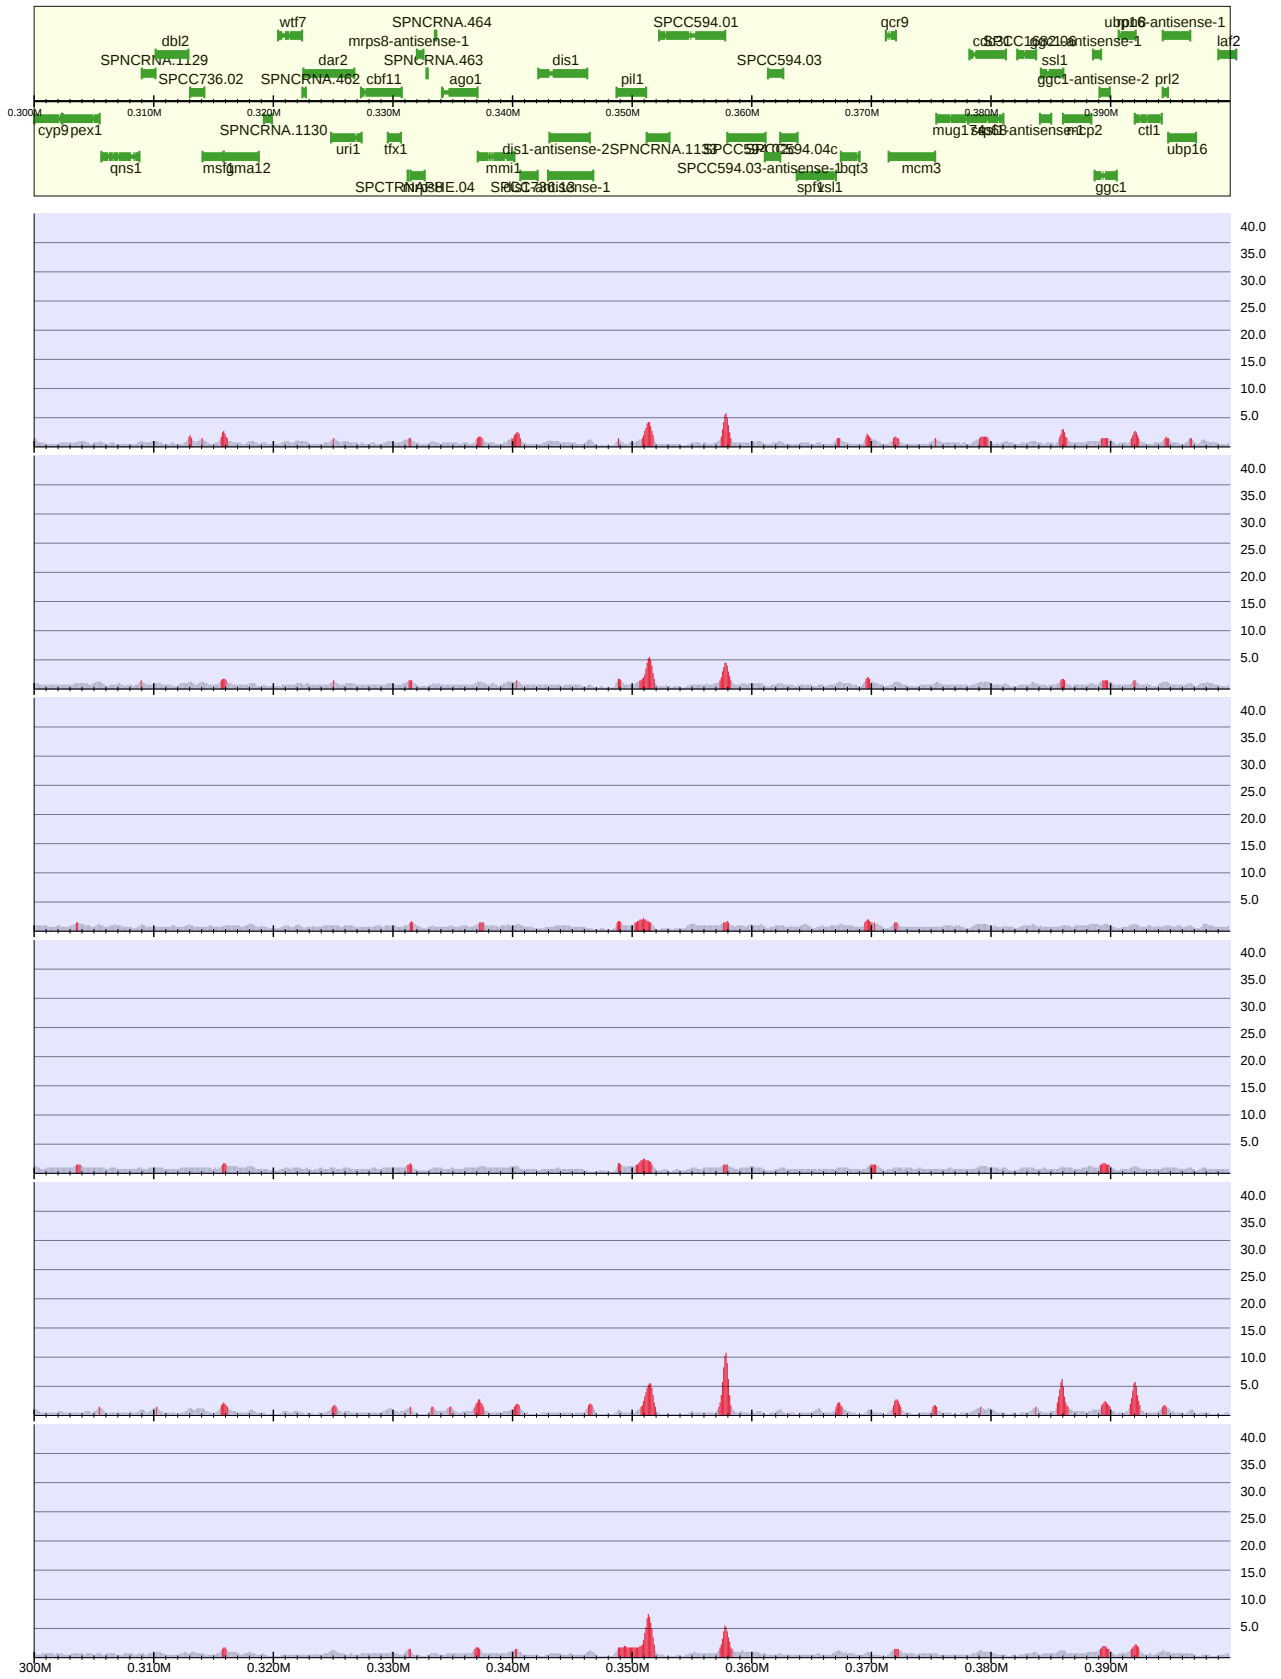

III\_1\_5

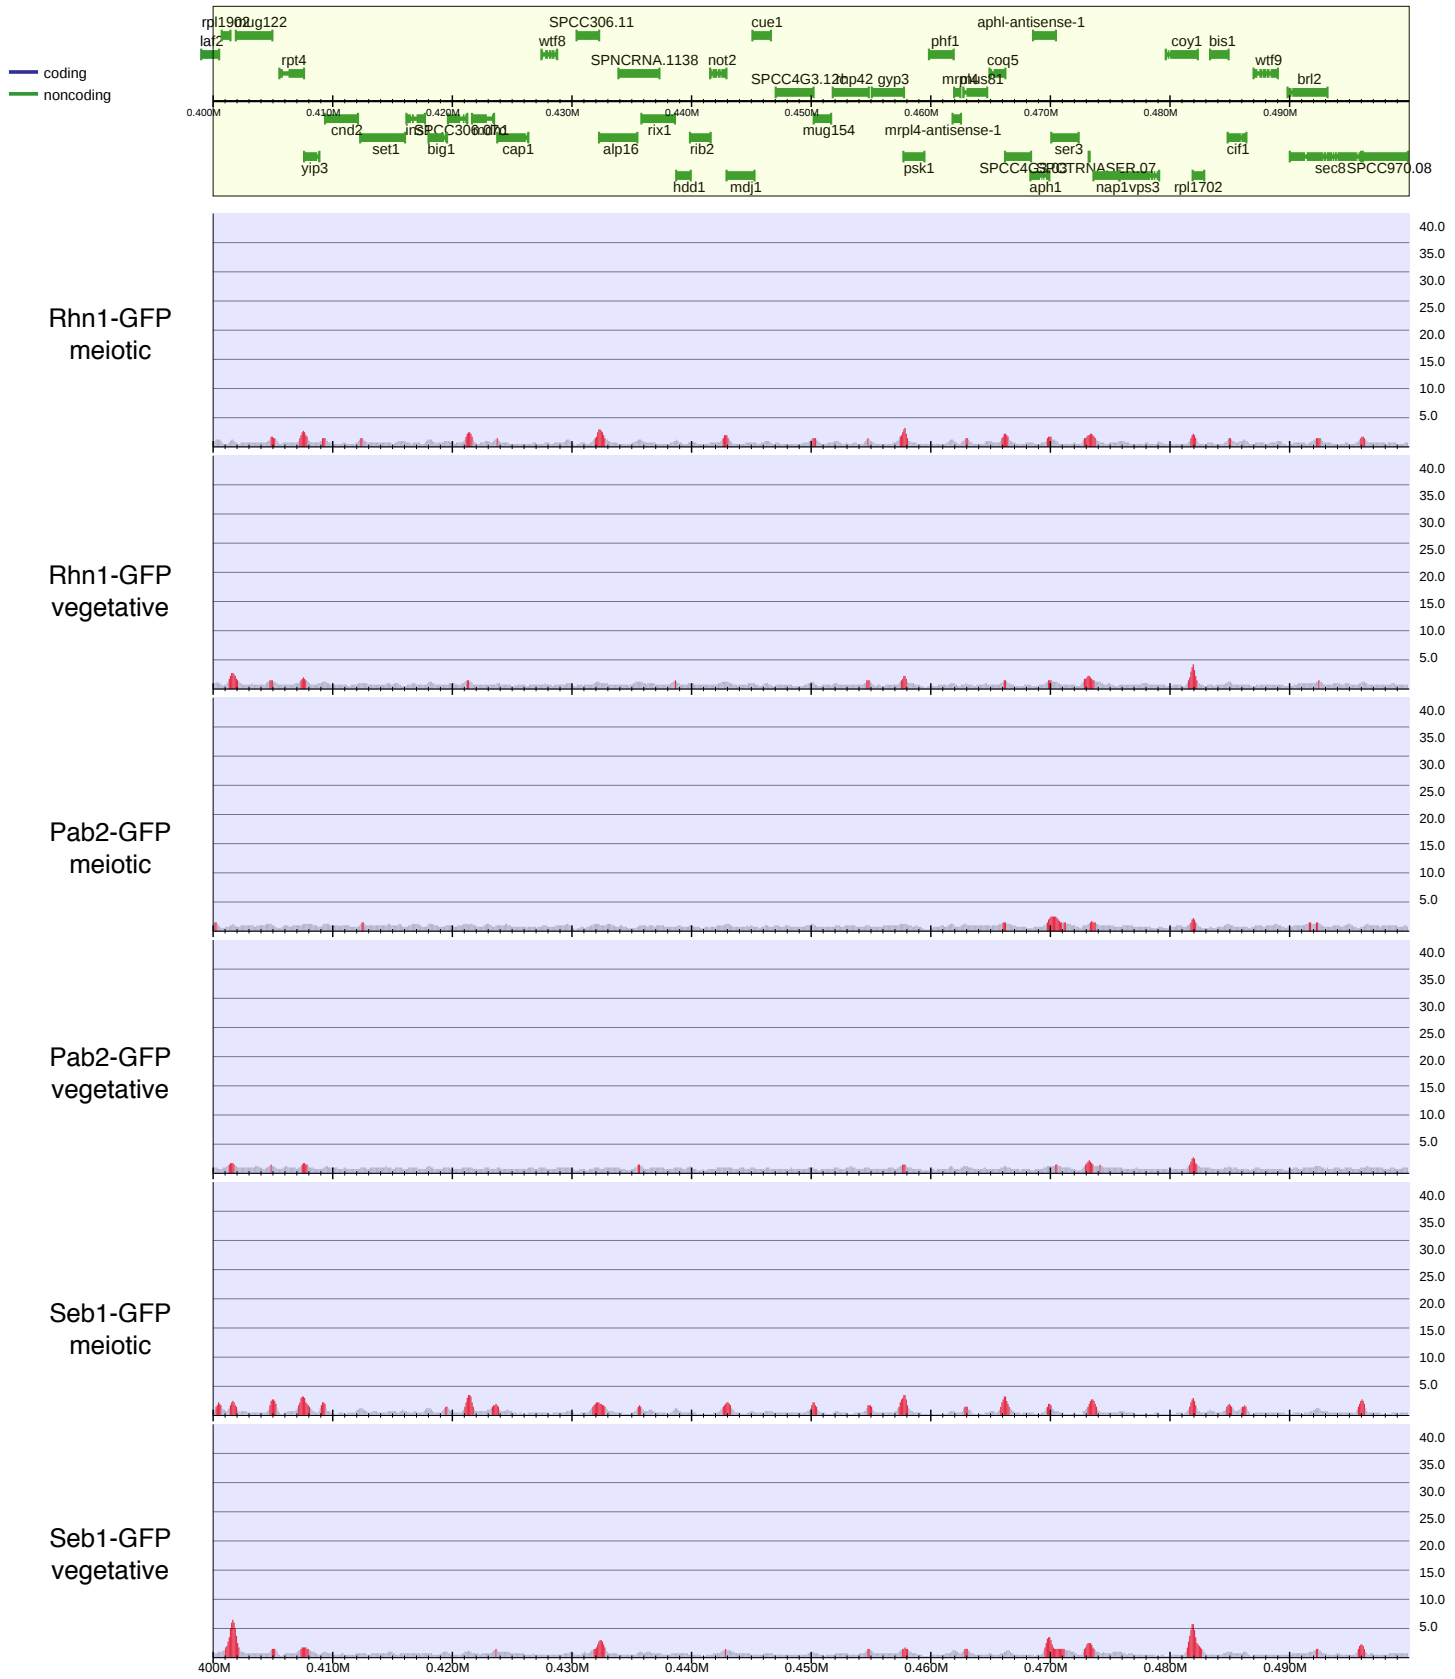

III\_1\_6

coding  
noncoding

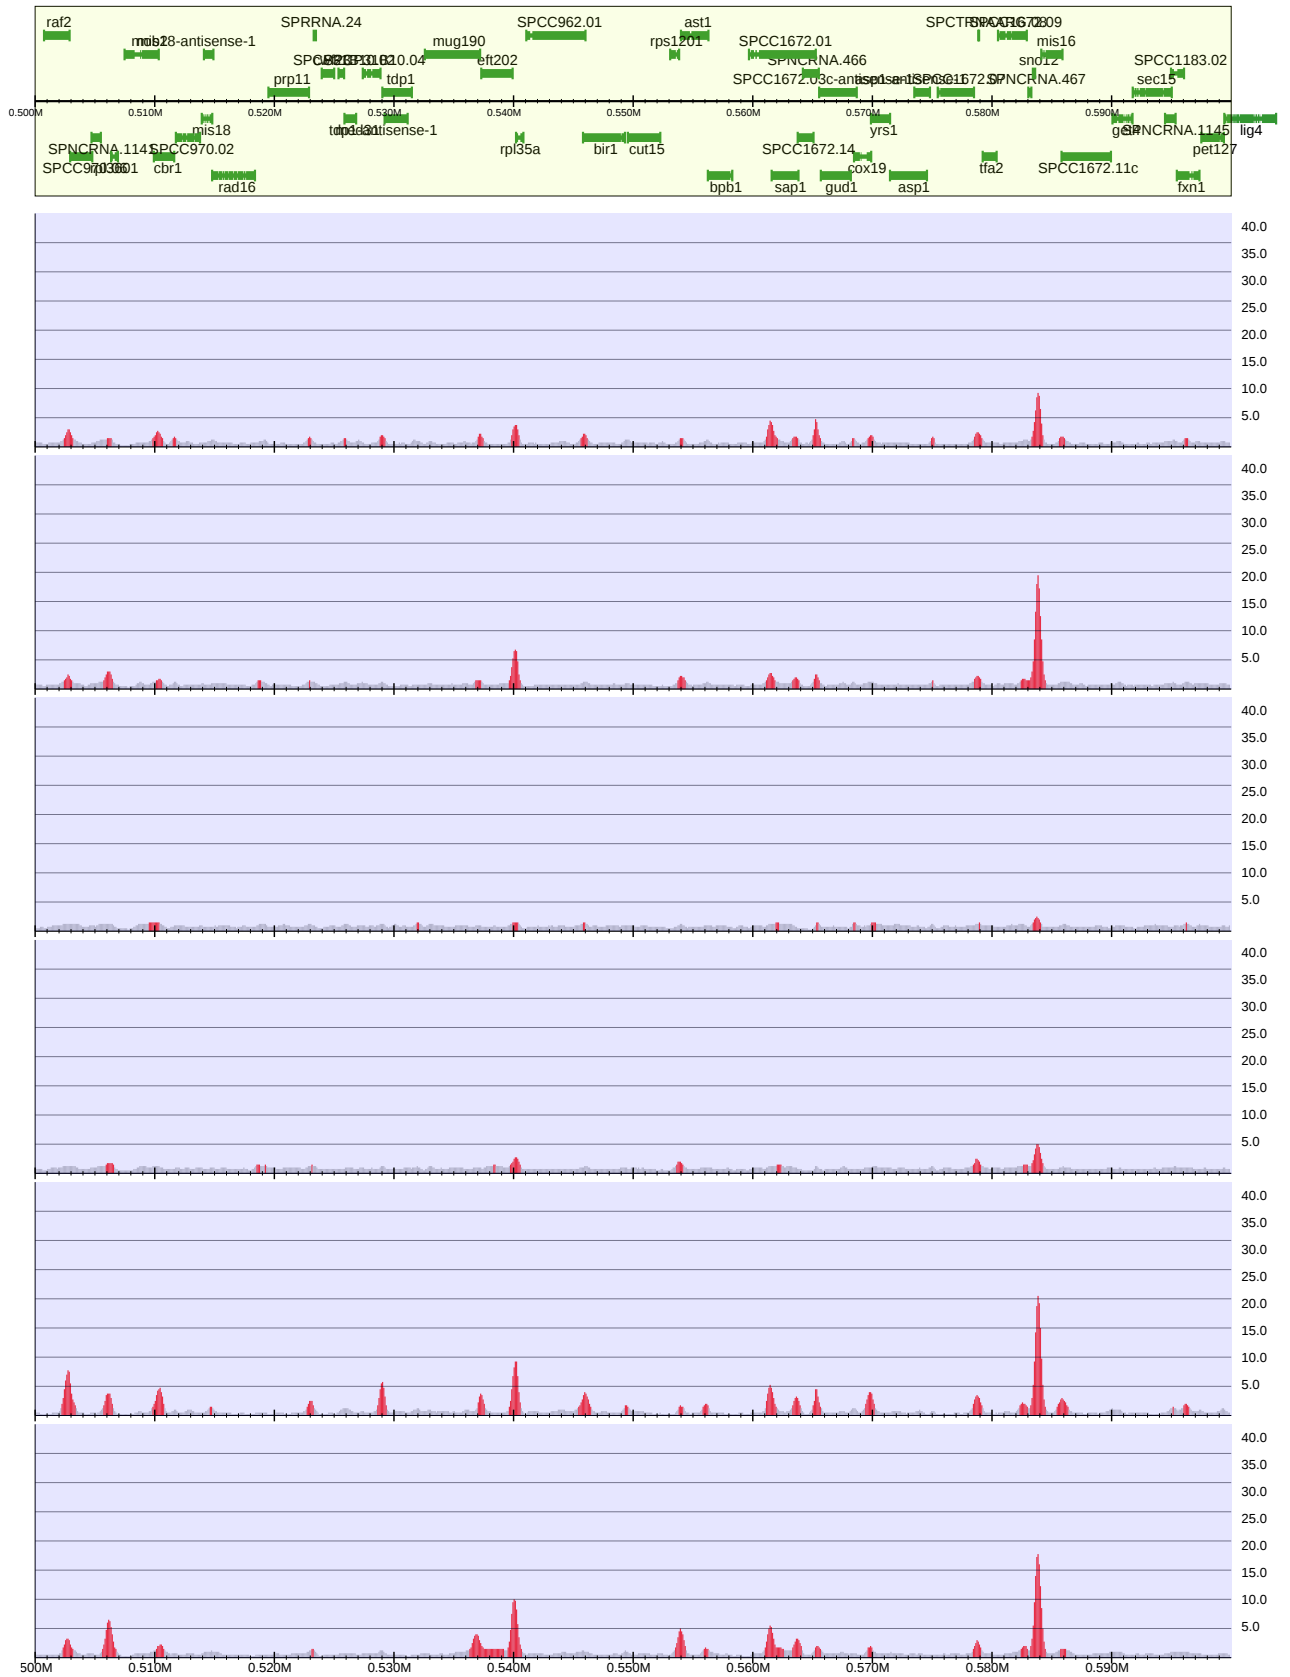



III\_1\_7

coding  
noncoding

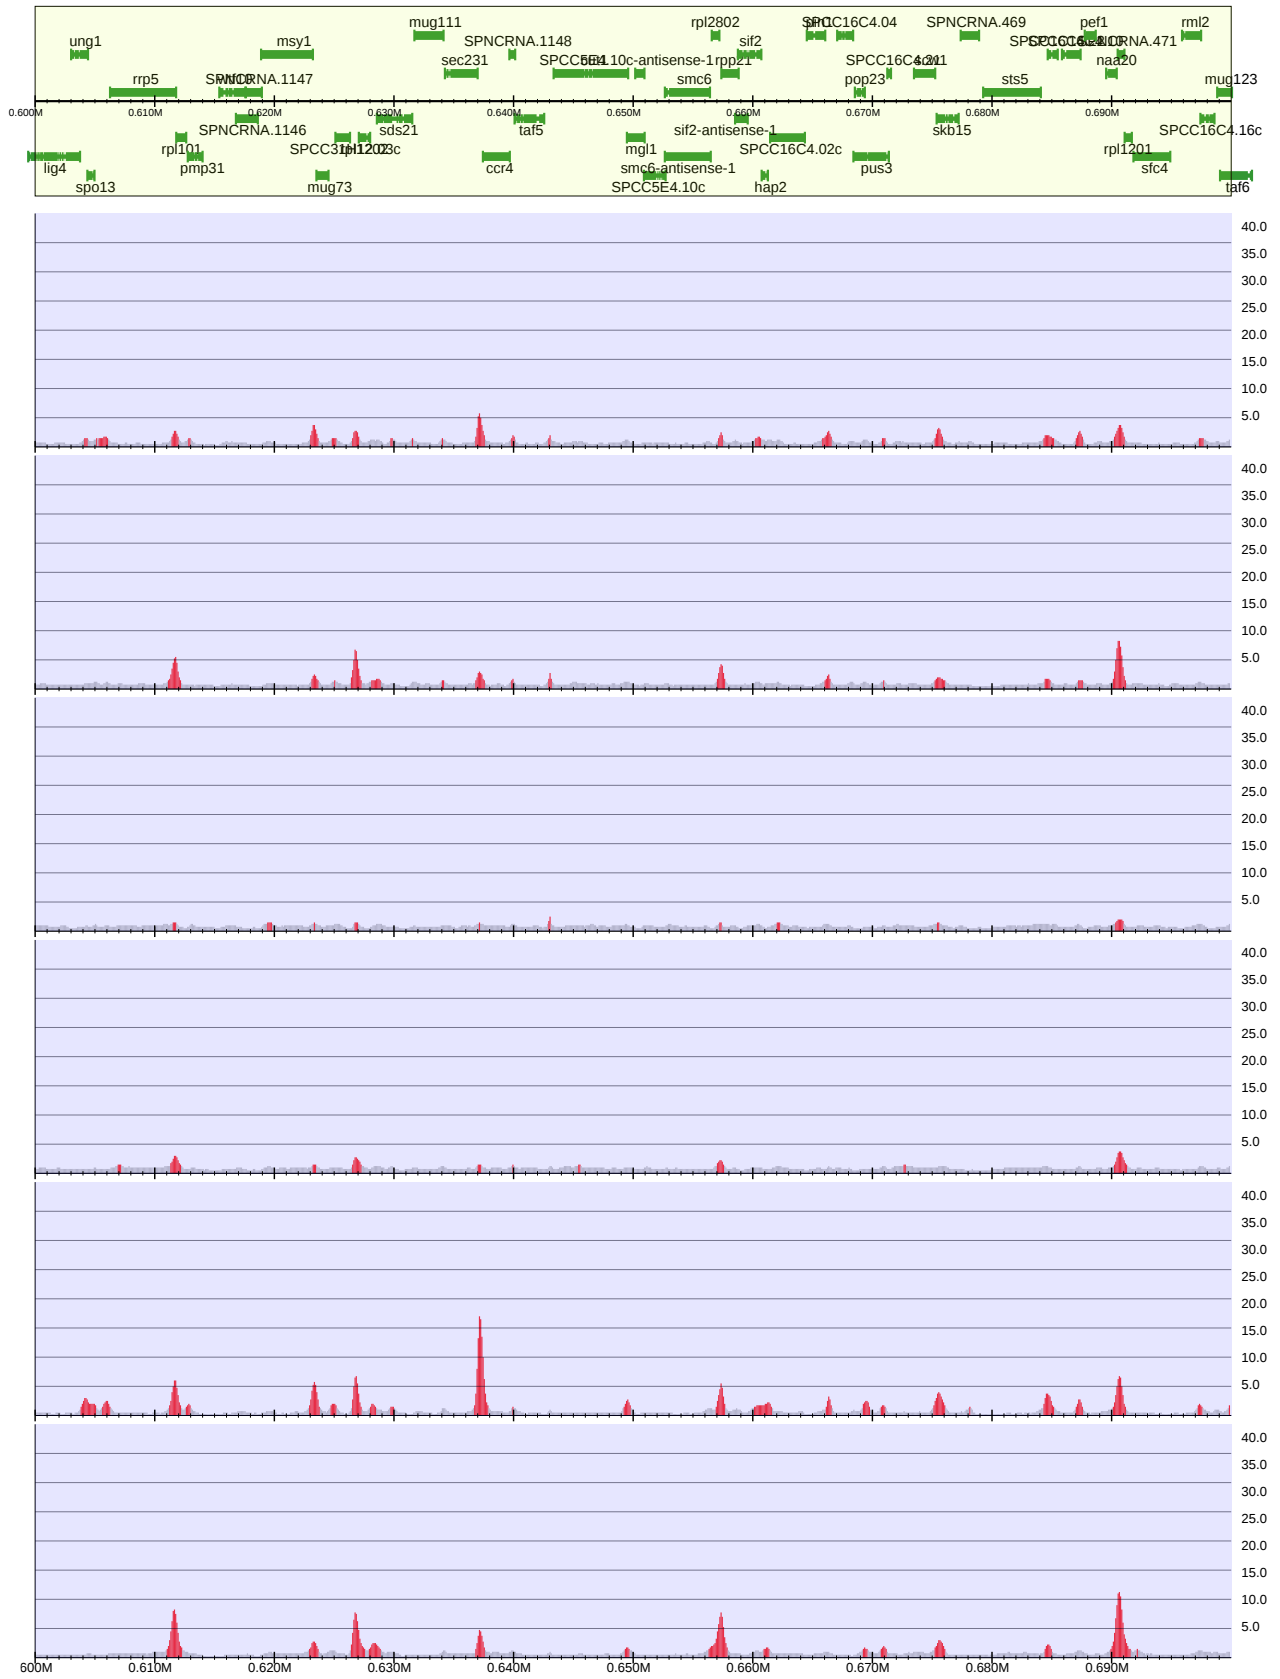

III\_1\_8

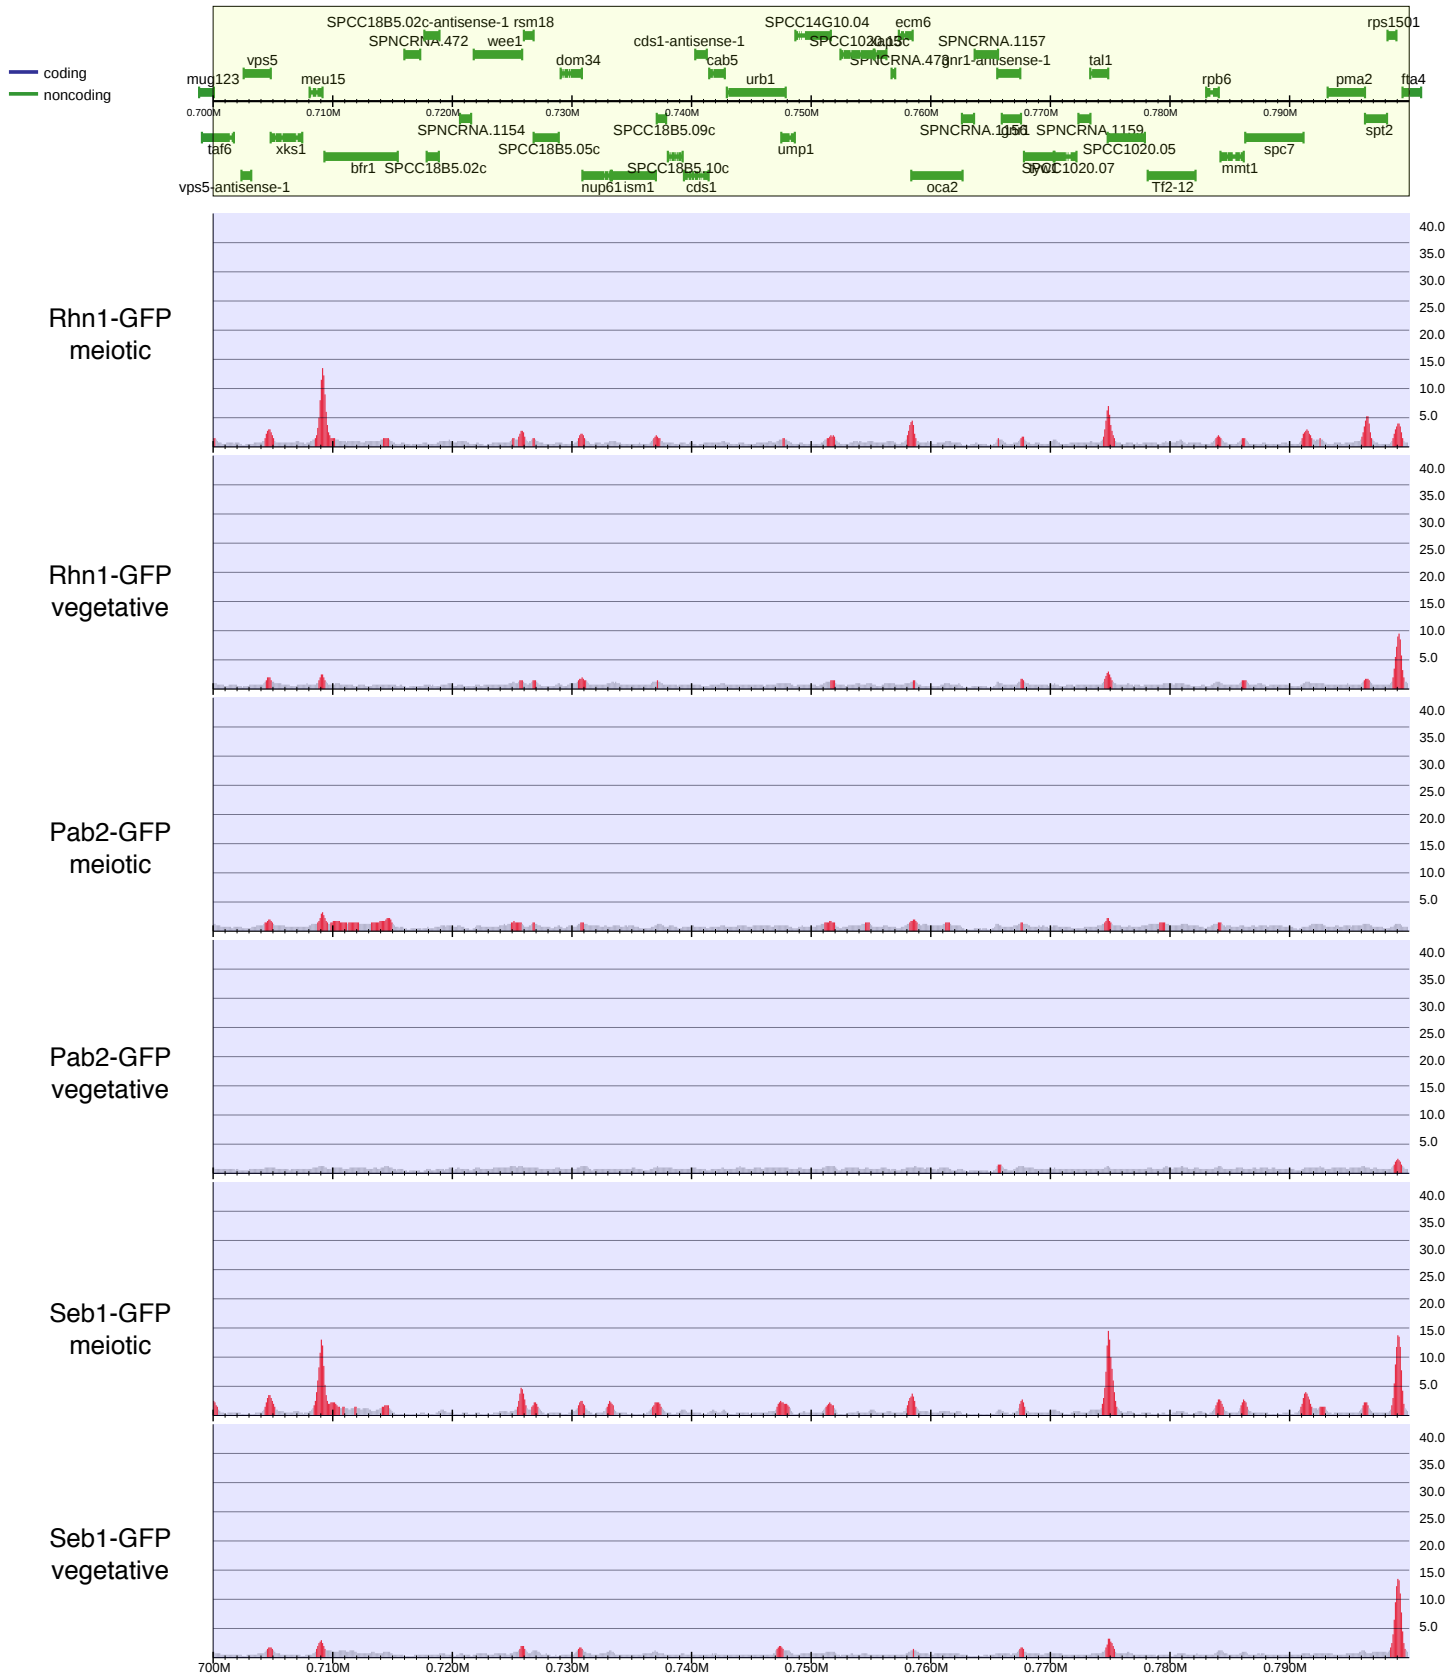

III\_1\_9

coding  
noncoding

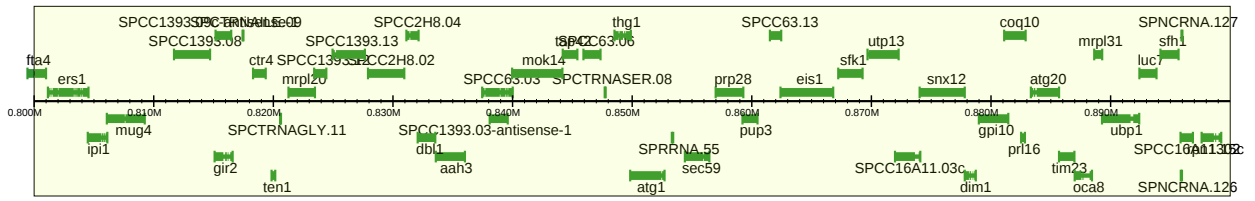

Rhn1-GFP  
meiotic

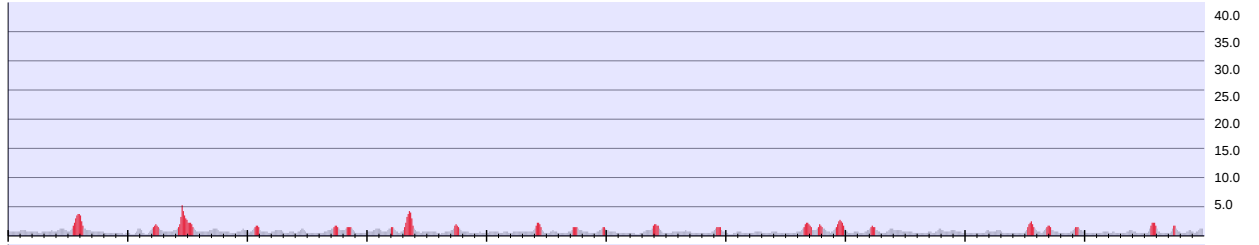

Rhn1-GFP  
vegetative

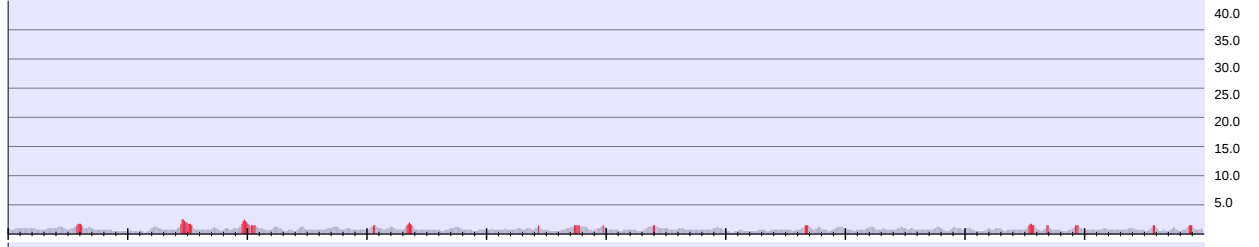

Pab2-GFP  
meiotic

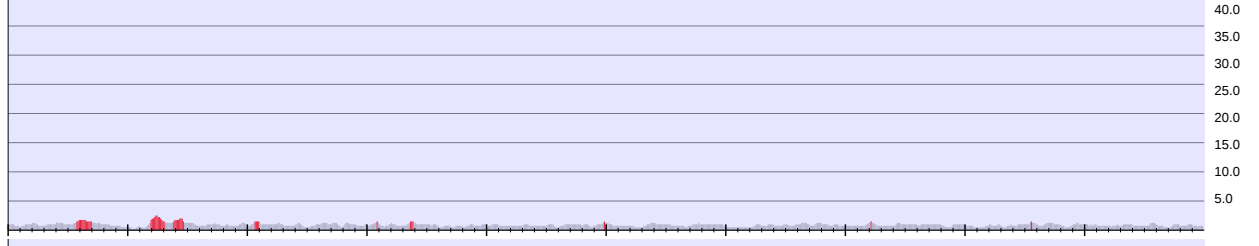

Pab2-GFP  
vegetative

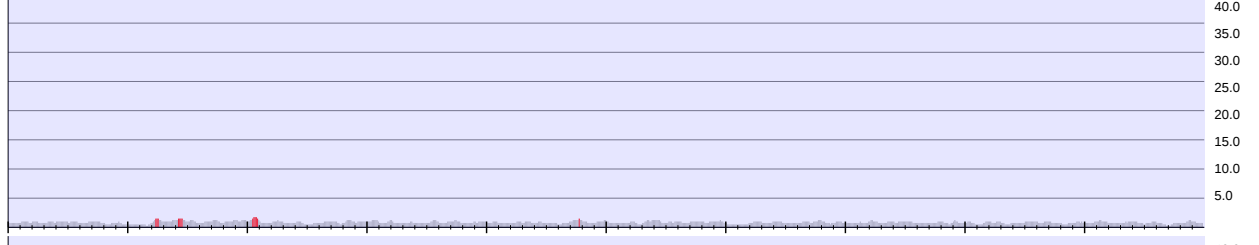

Seb1-GFP  
meiotic

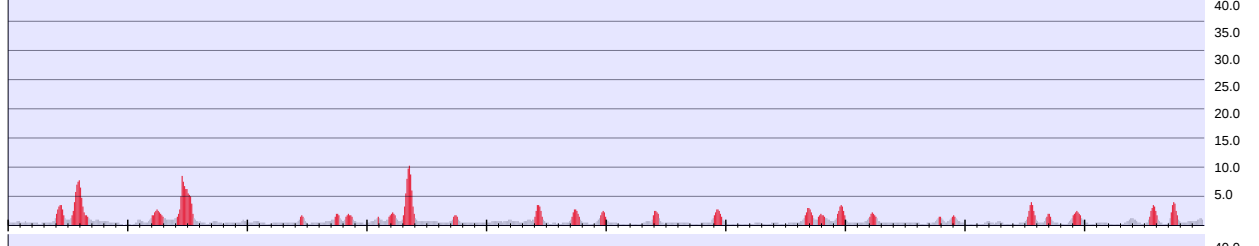

Seb1-GFP  
vegetative

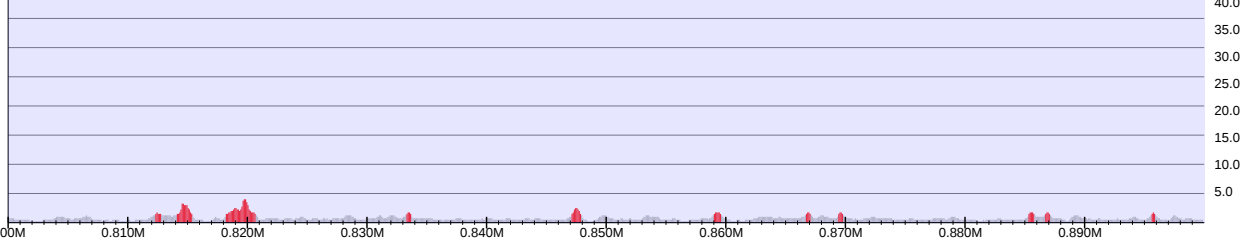

III\_1\_10

coding  
noncoding

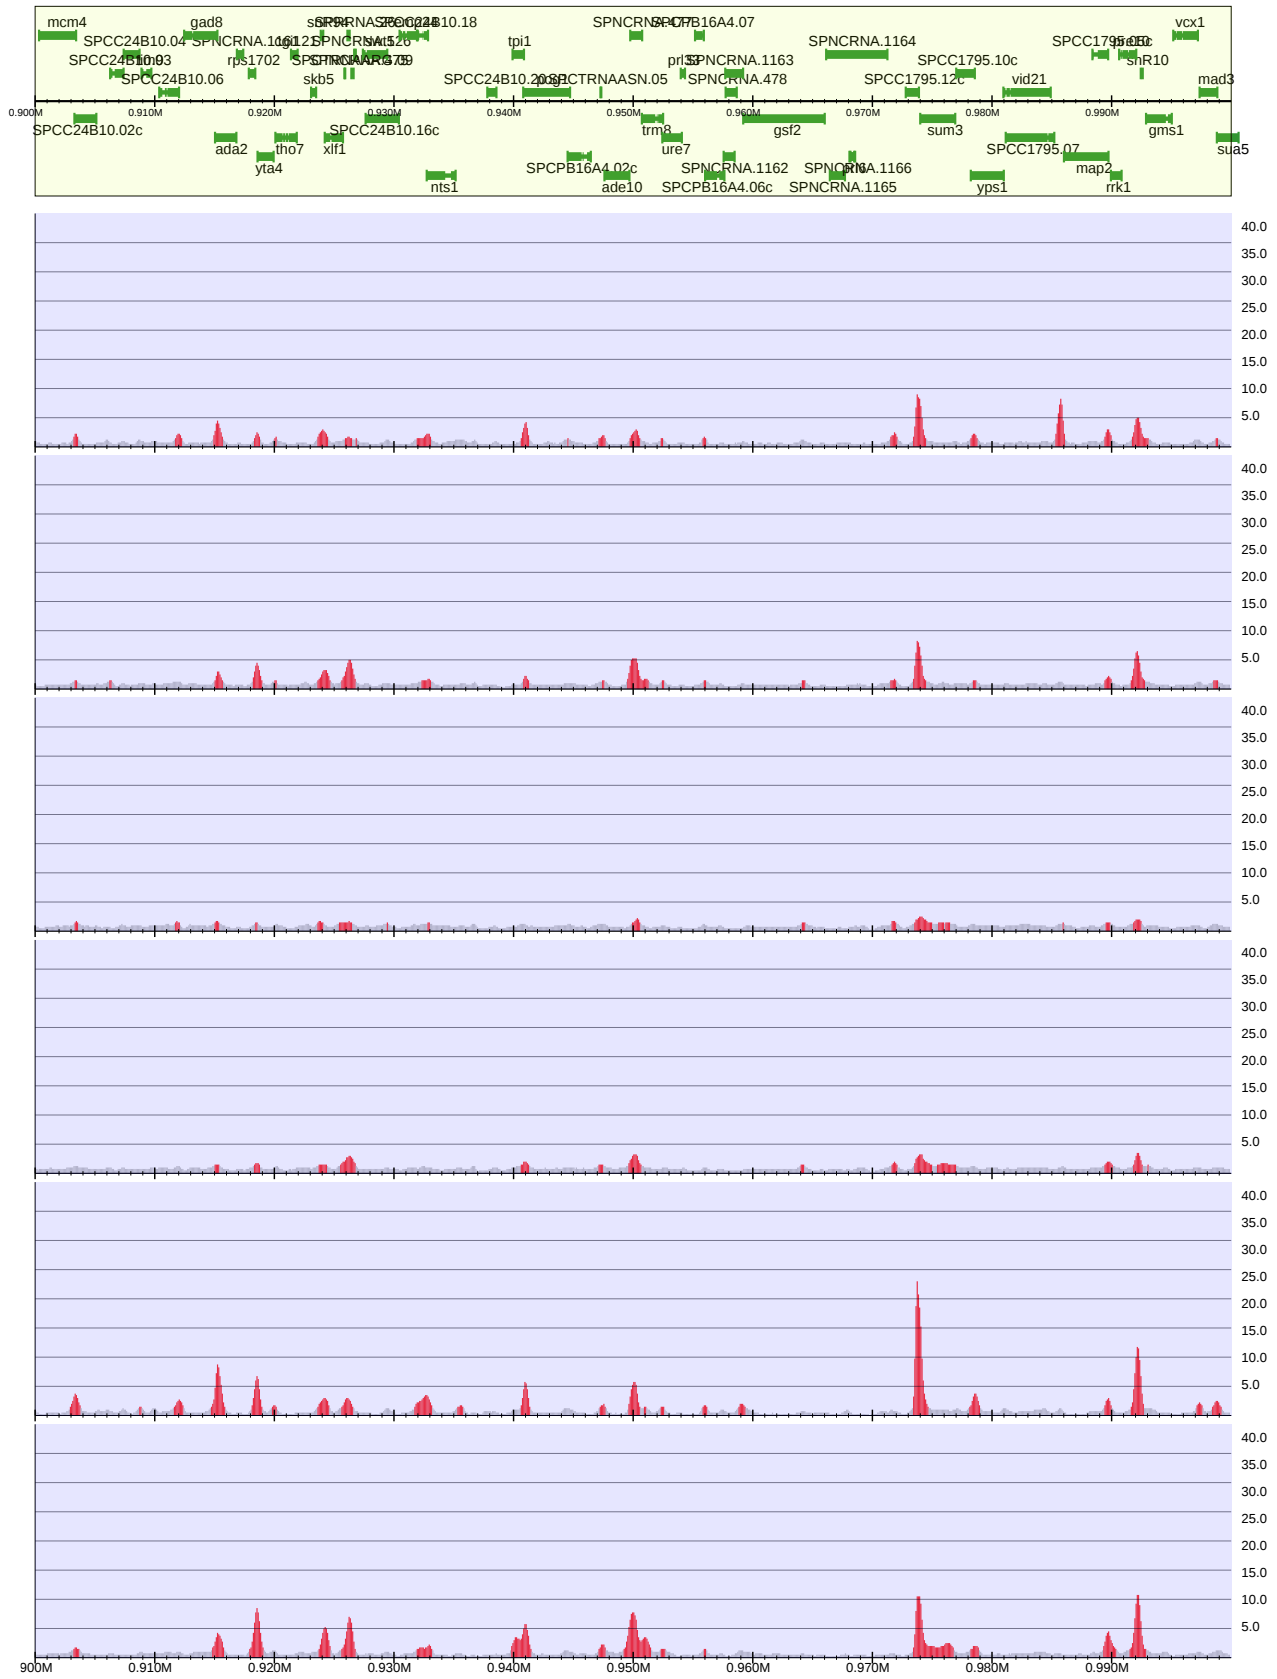

III\_1\_11

— coding  
— noncoding

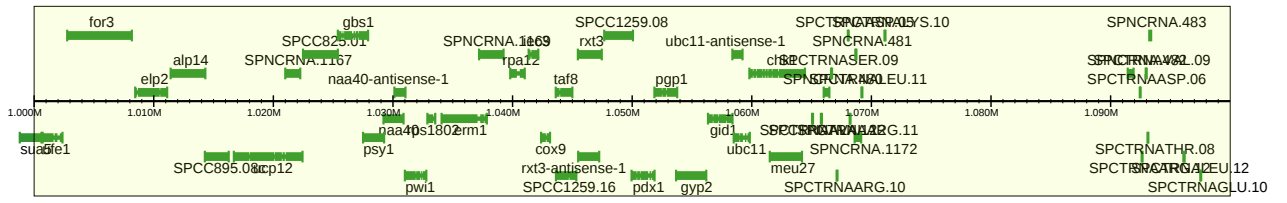

Rhn1-GFP  
meiotic

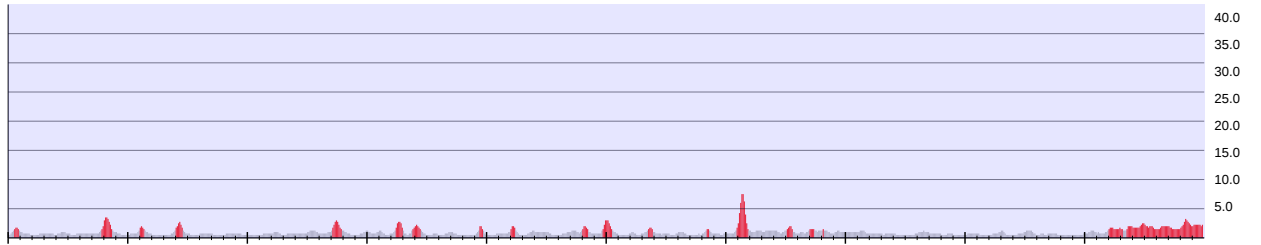

Rhn1-GFP  
vegetative

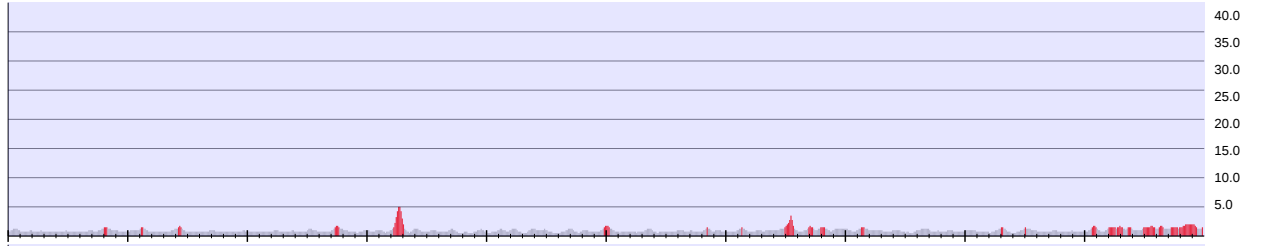

Pab2-GFP  
meiotic

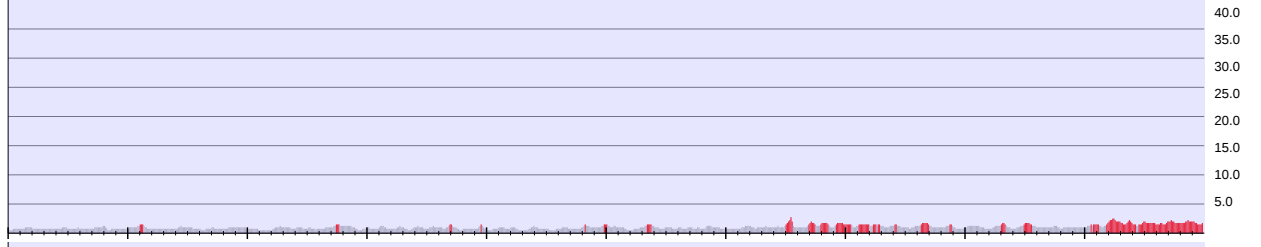

Pab2-GFP  
vegetative

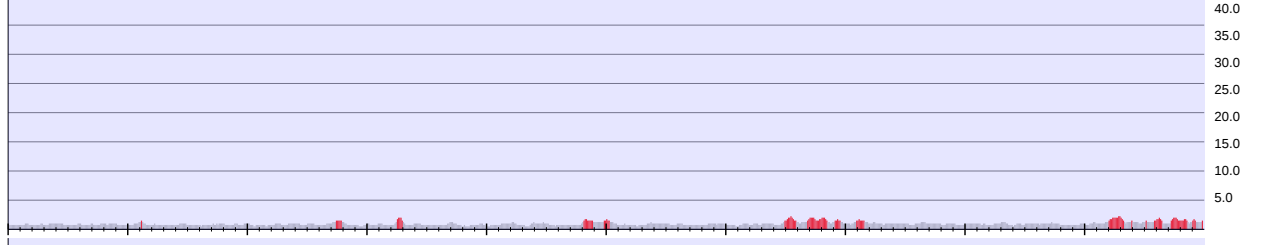

Seb1-GFP  
meiotic

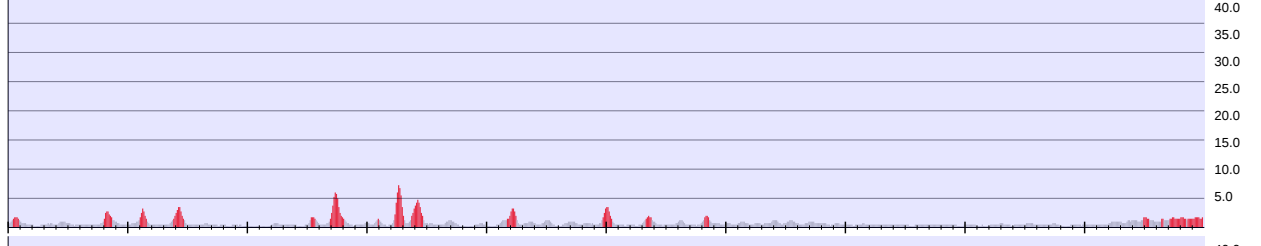

Seb1-GFP  
vegetative

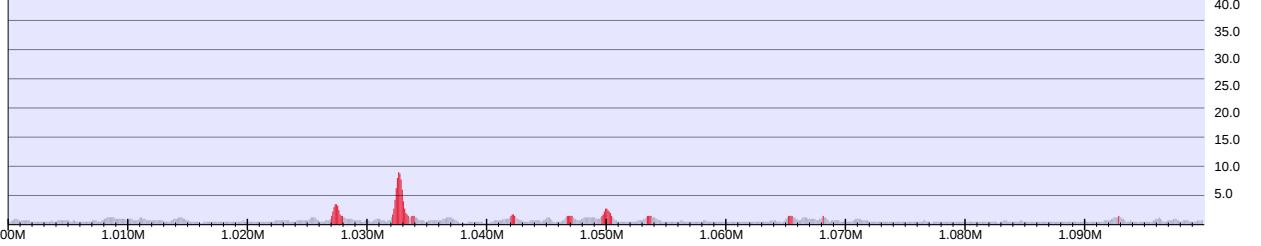

III\_1\_12

coding  
noncoding

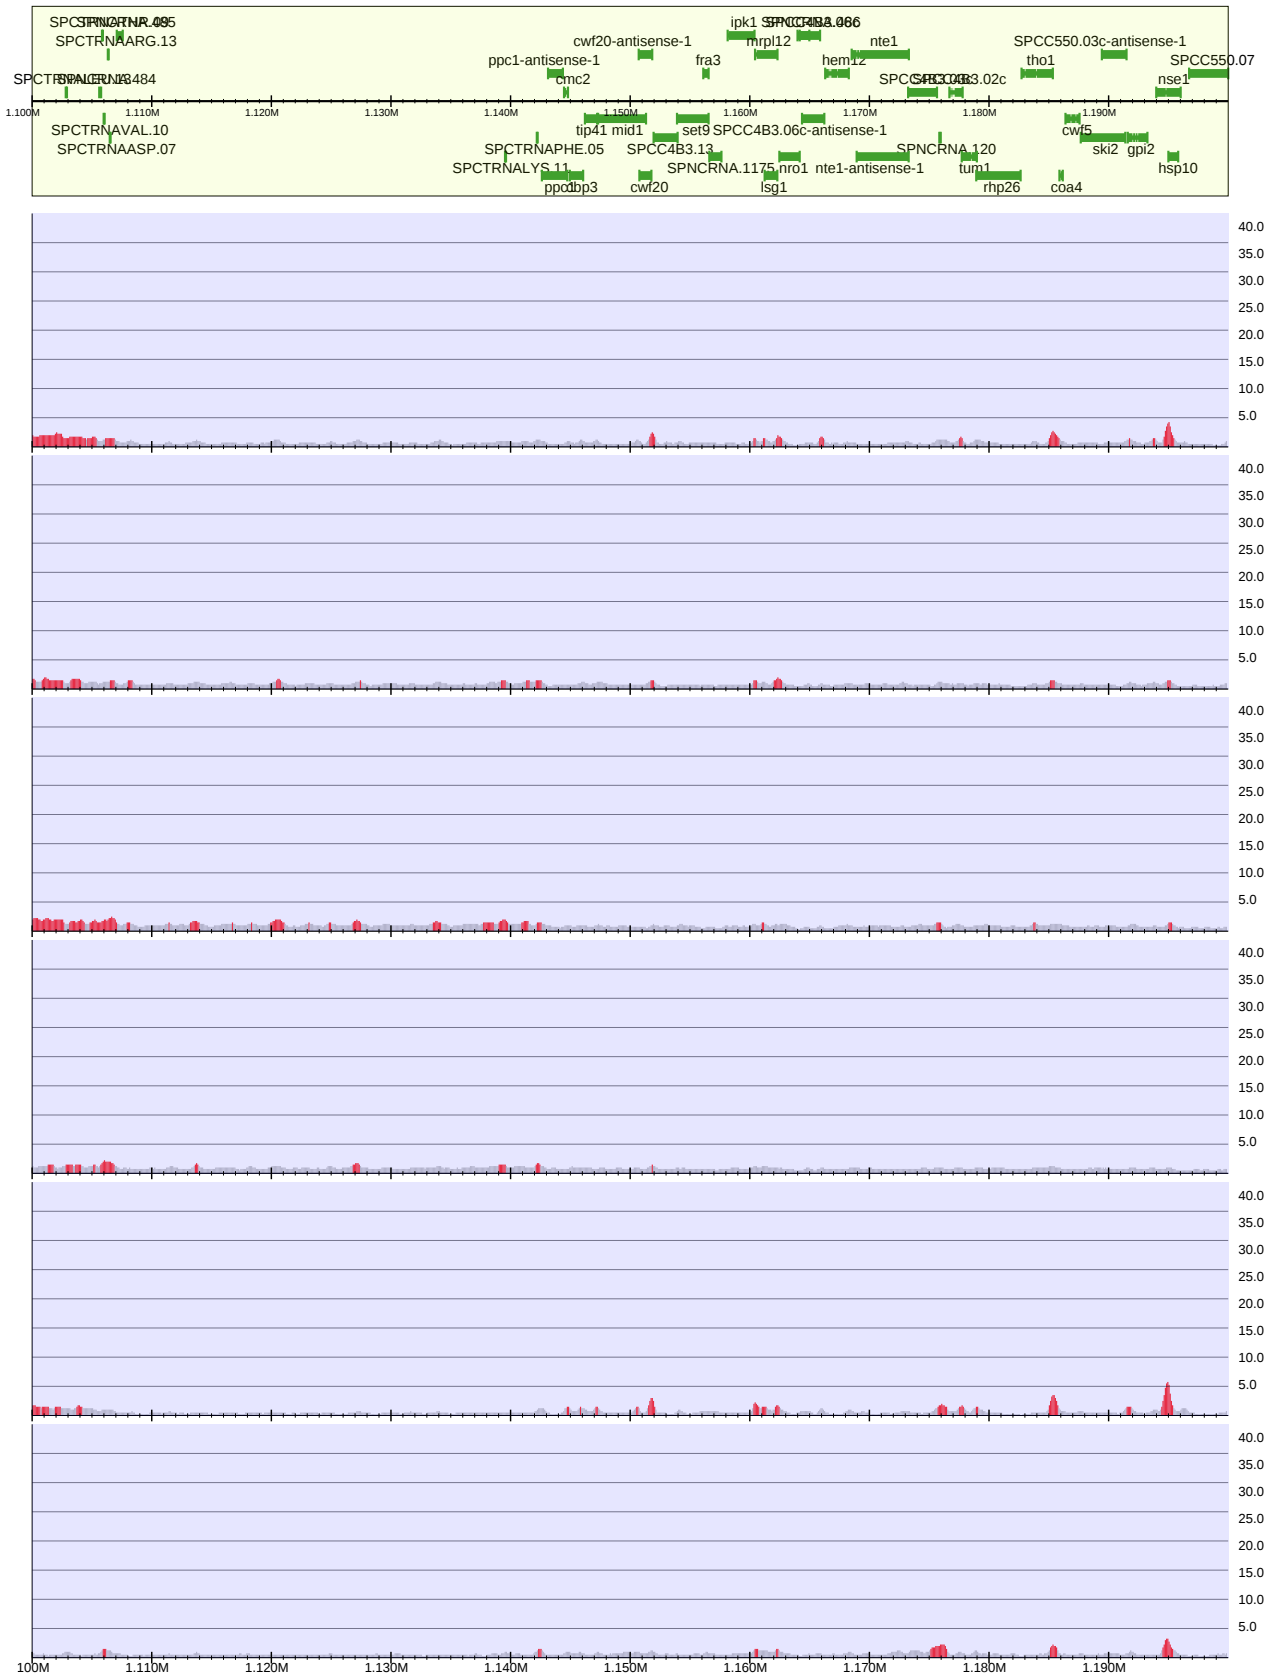

III\_1\_13

— coding  
— noncoding

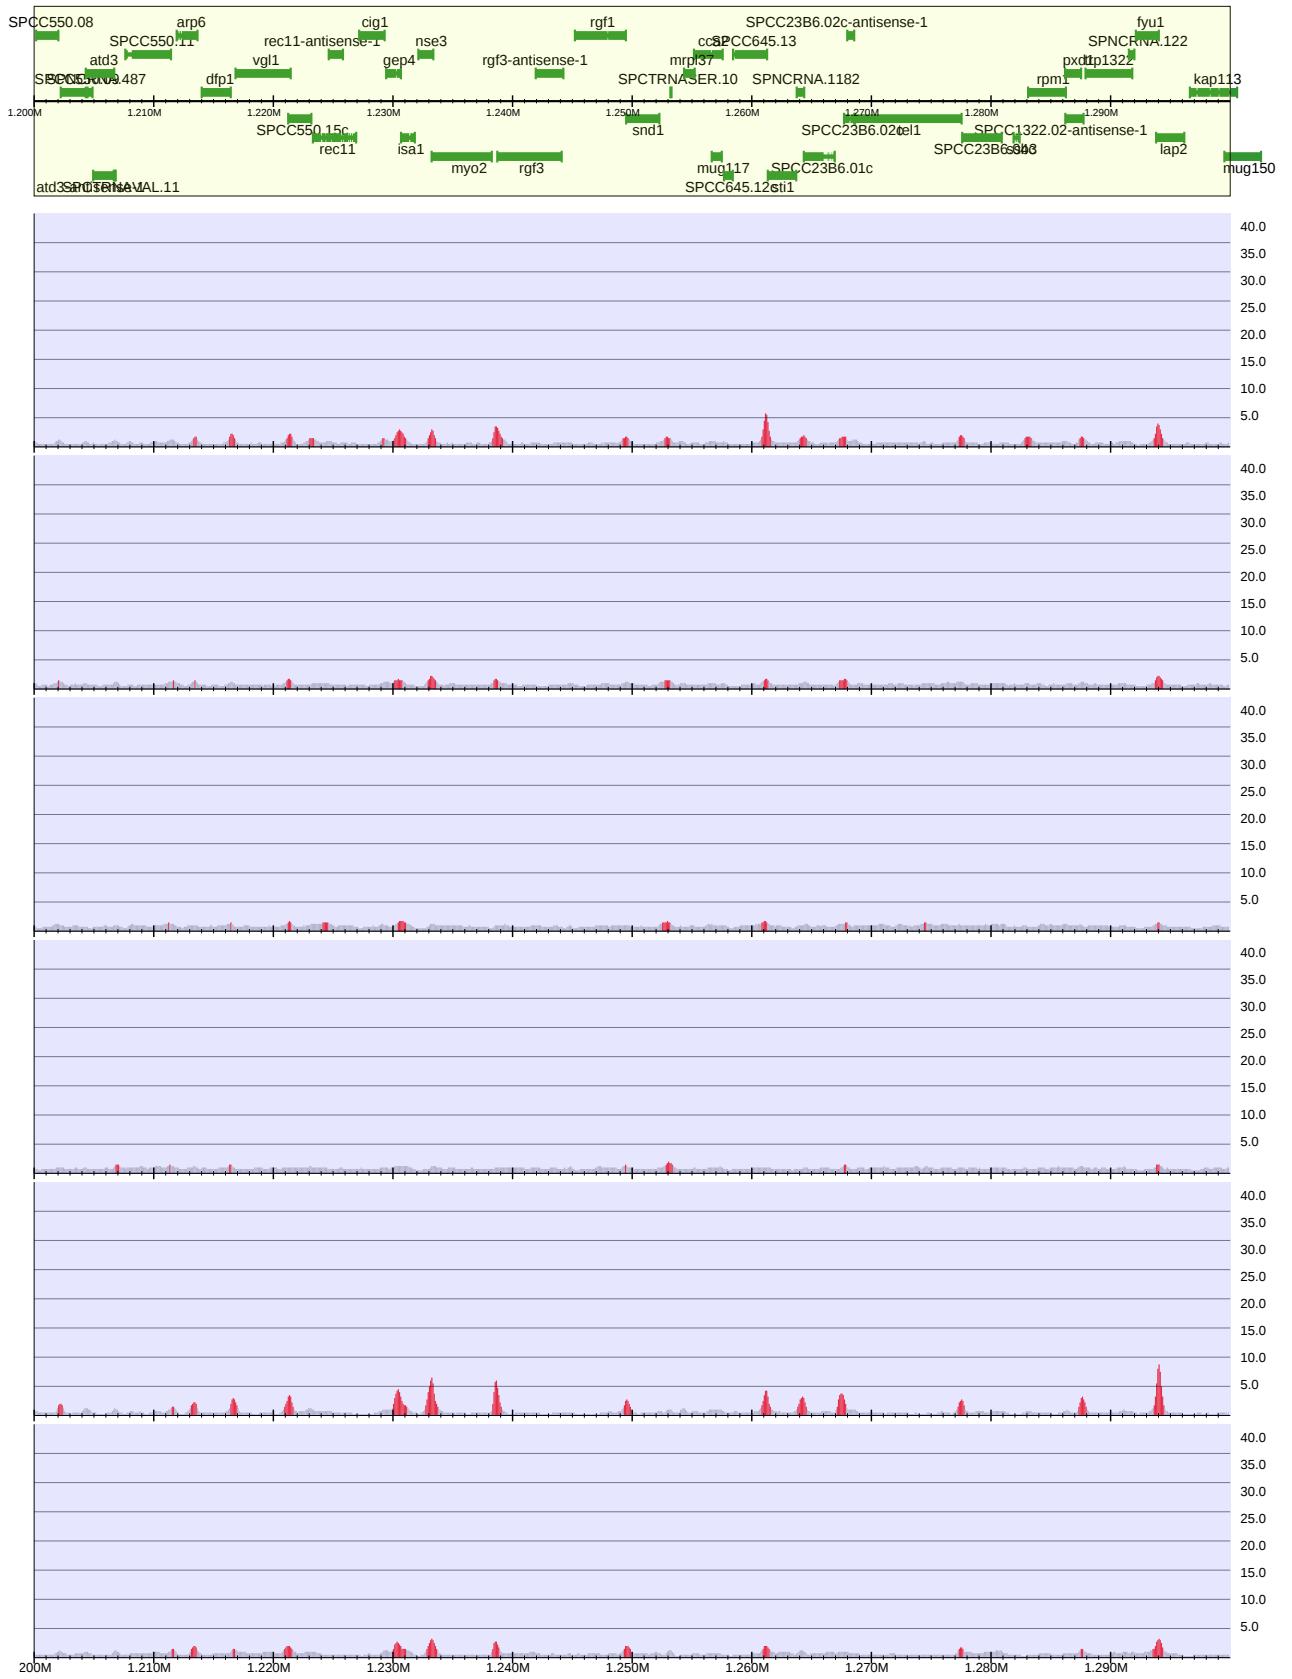

III\_1\_14

coding  
noncoding

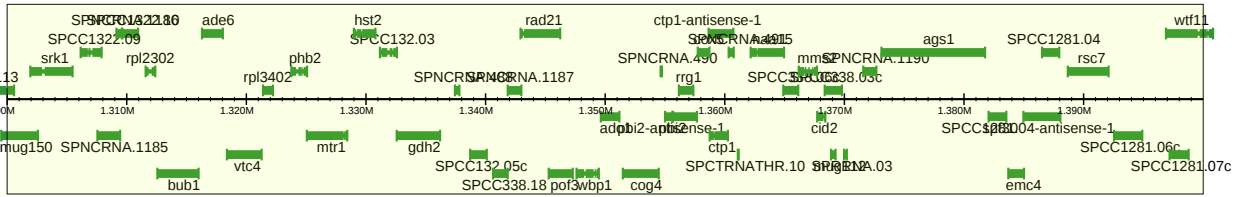

Rhn1-GFP  
meiotic

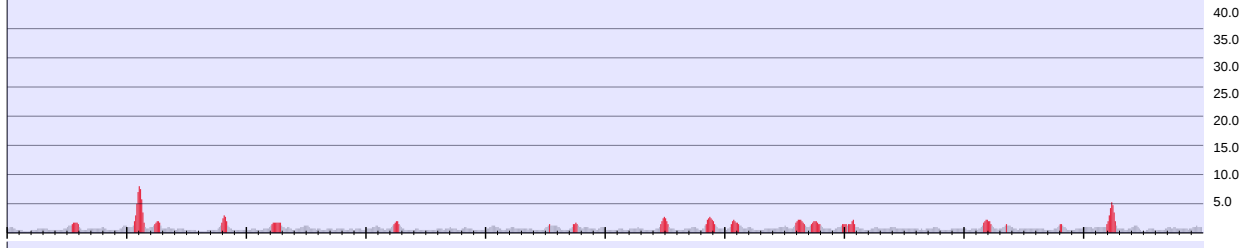

Rhn1-GFP  
vegetative

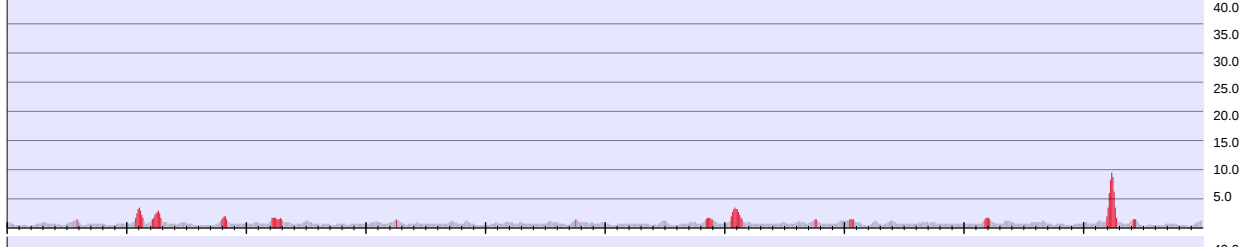

Pab2-GFP  
meiotic

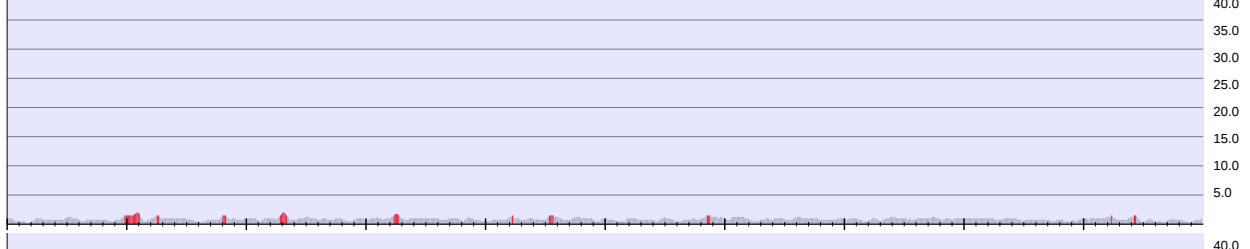

Pab2-GFP  
vegetative

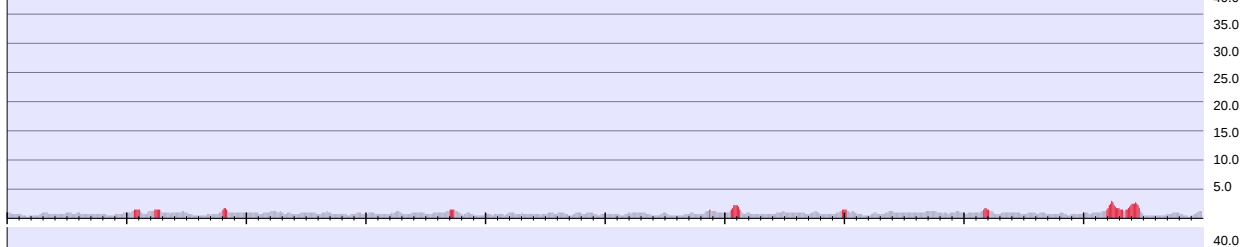

Seb1-GFP  
meiotic

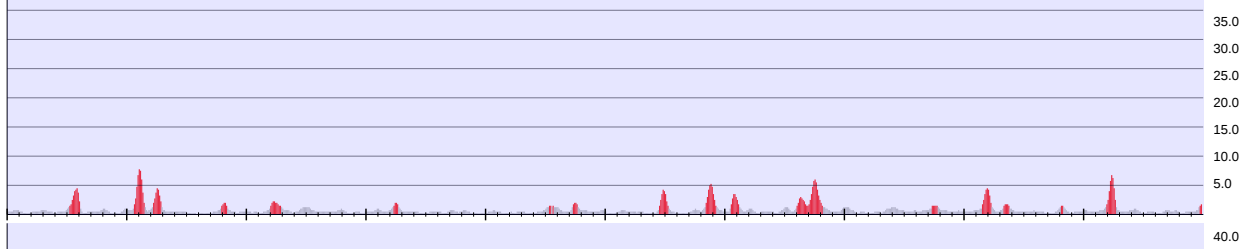

Seb1-GFP  
vegetative

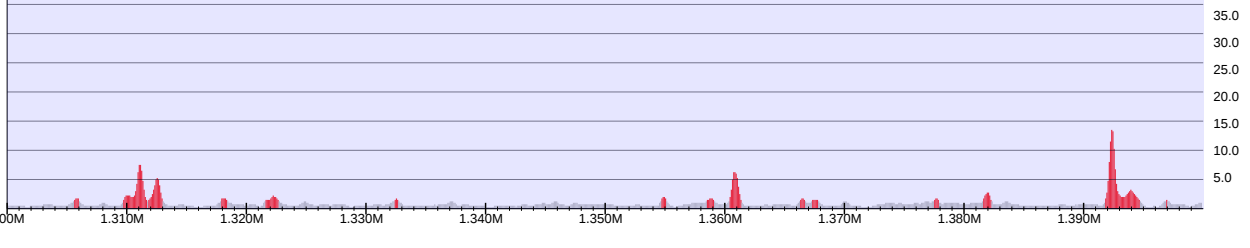

300M 1.310M 1.320M 1.330M 1.340M 1.350M 1.360M 1.370M 1.380M 1.390M





III\_1\_16

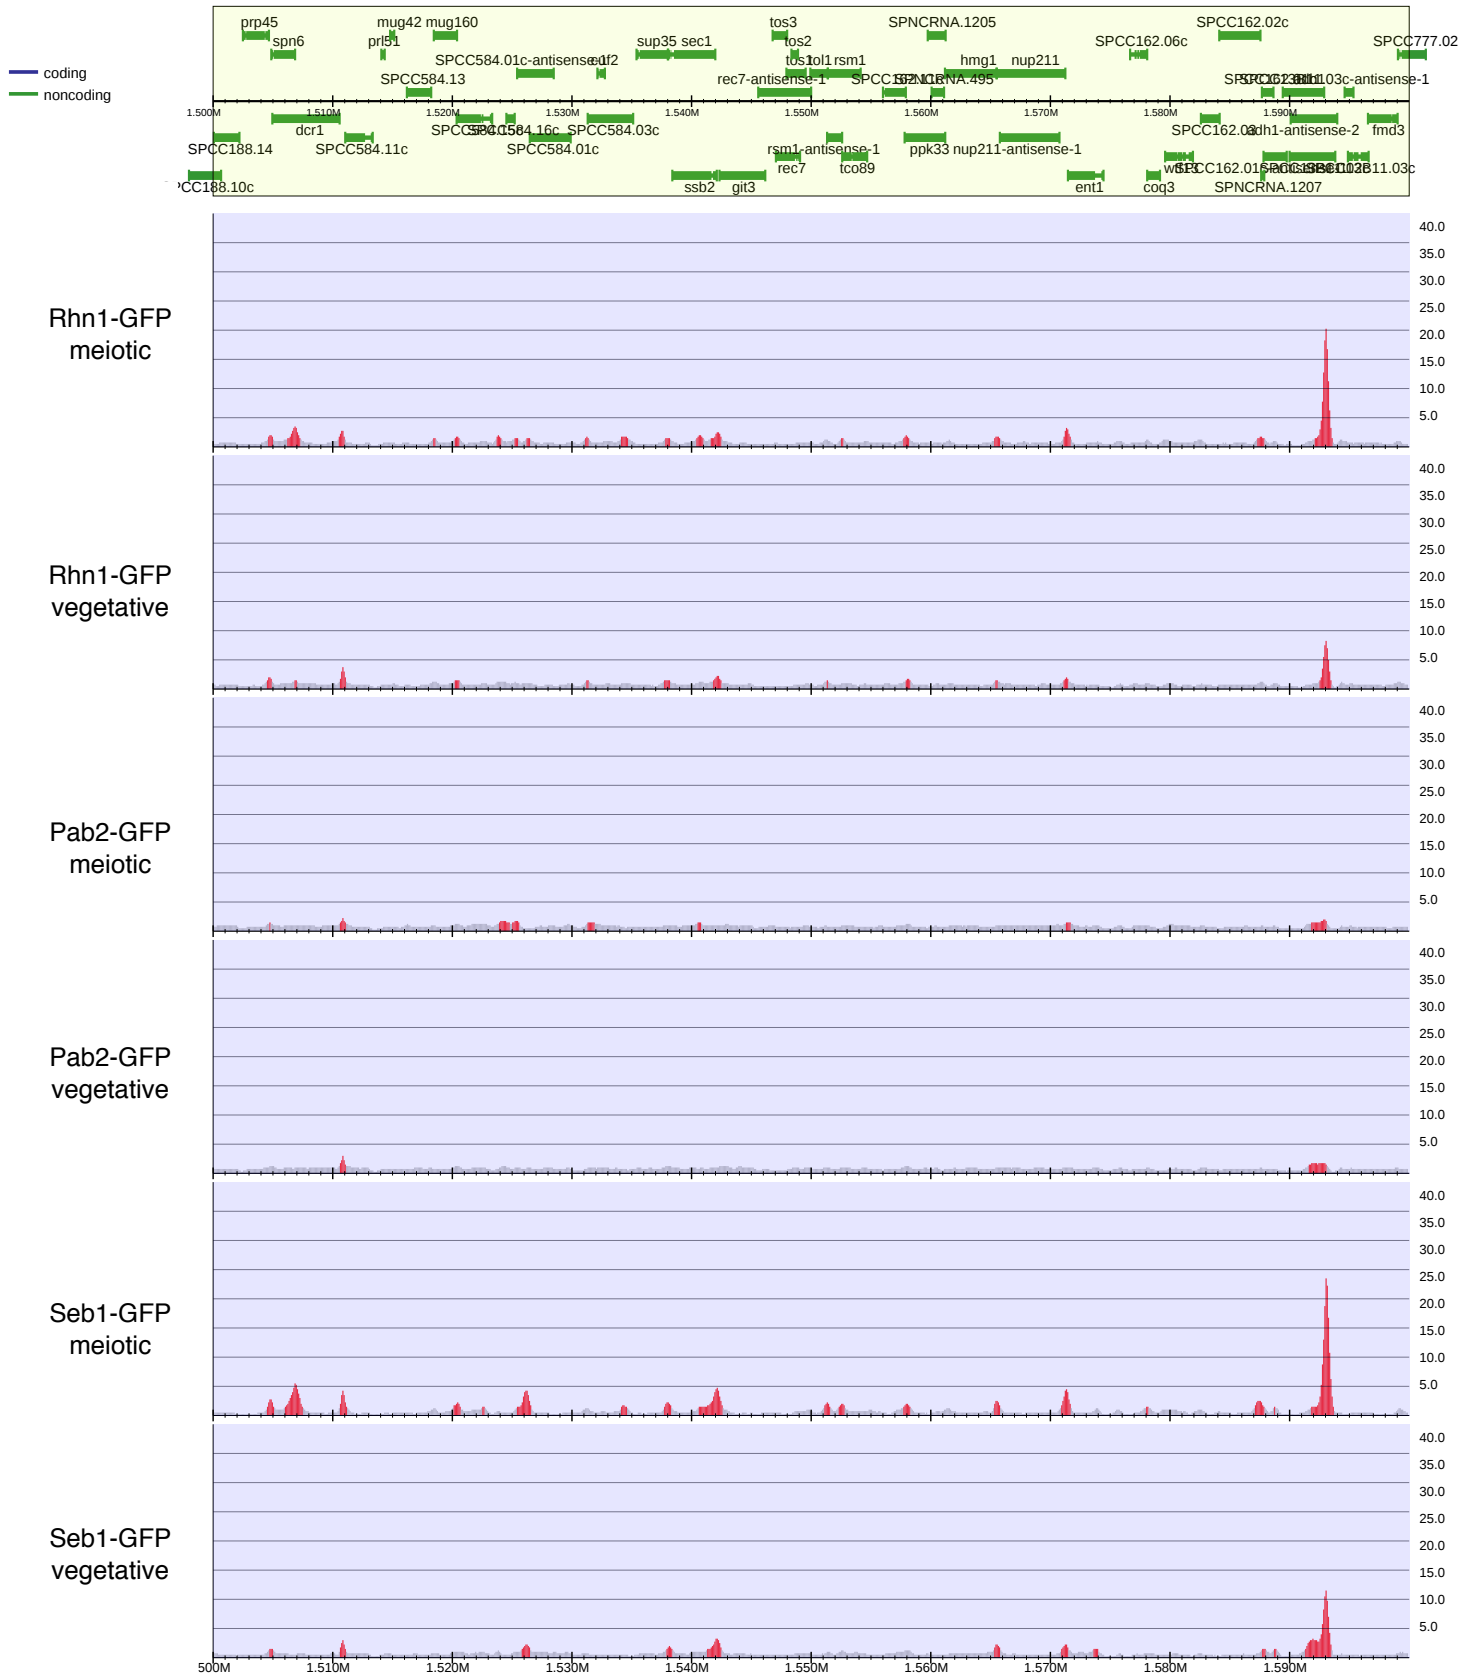





III\_1\_19

coding  
noncoding

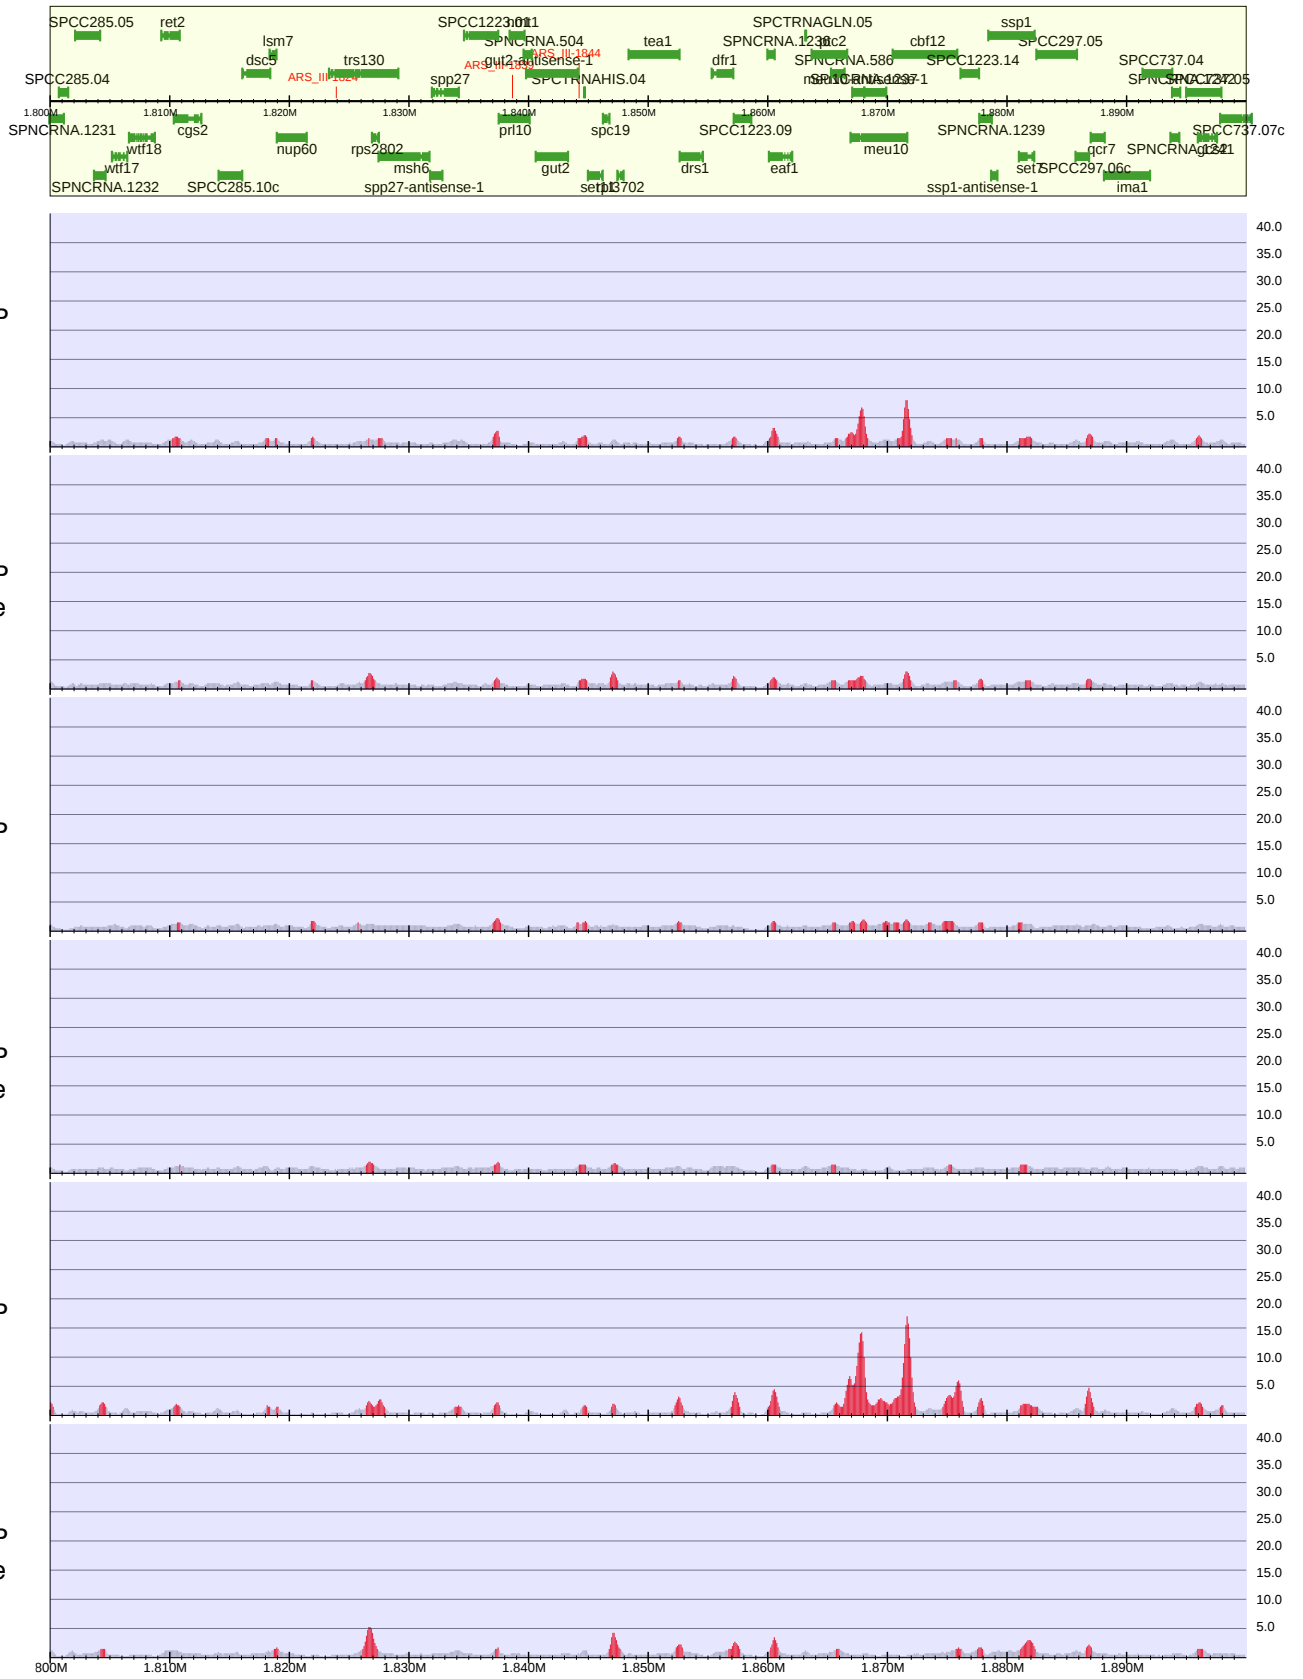

III\_1\_20

coding  
noncoding

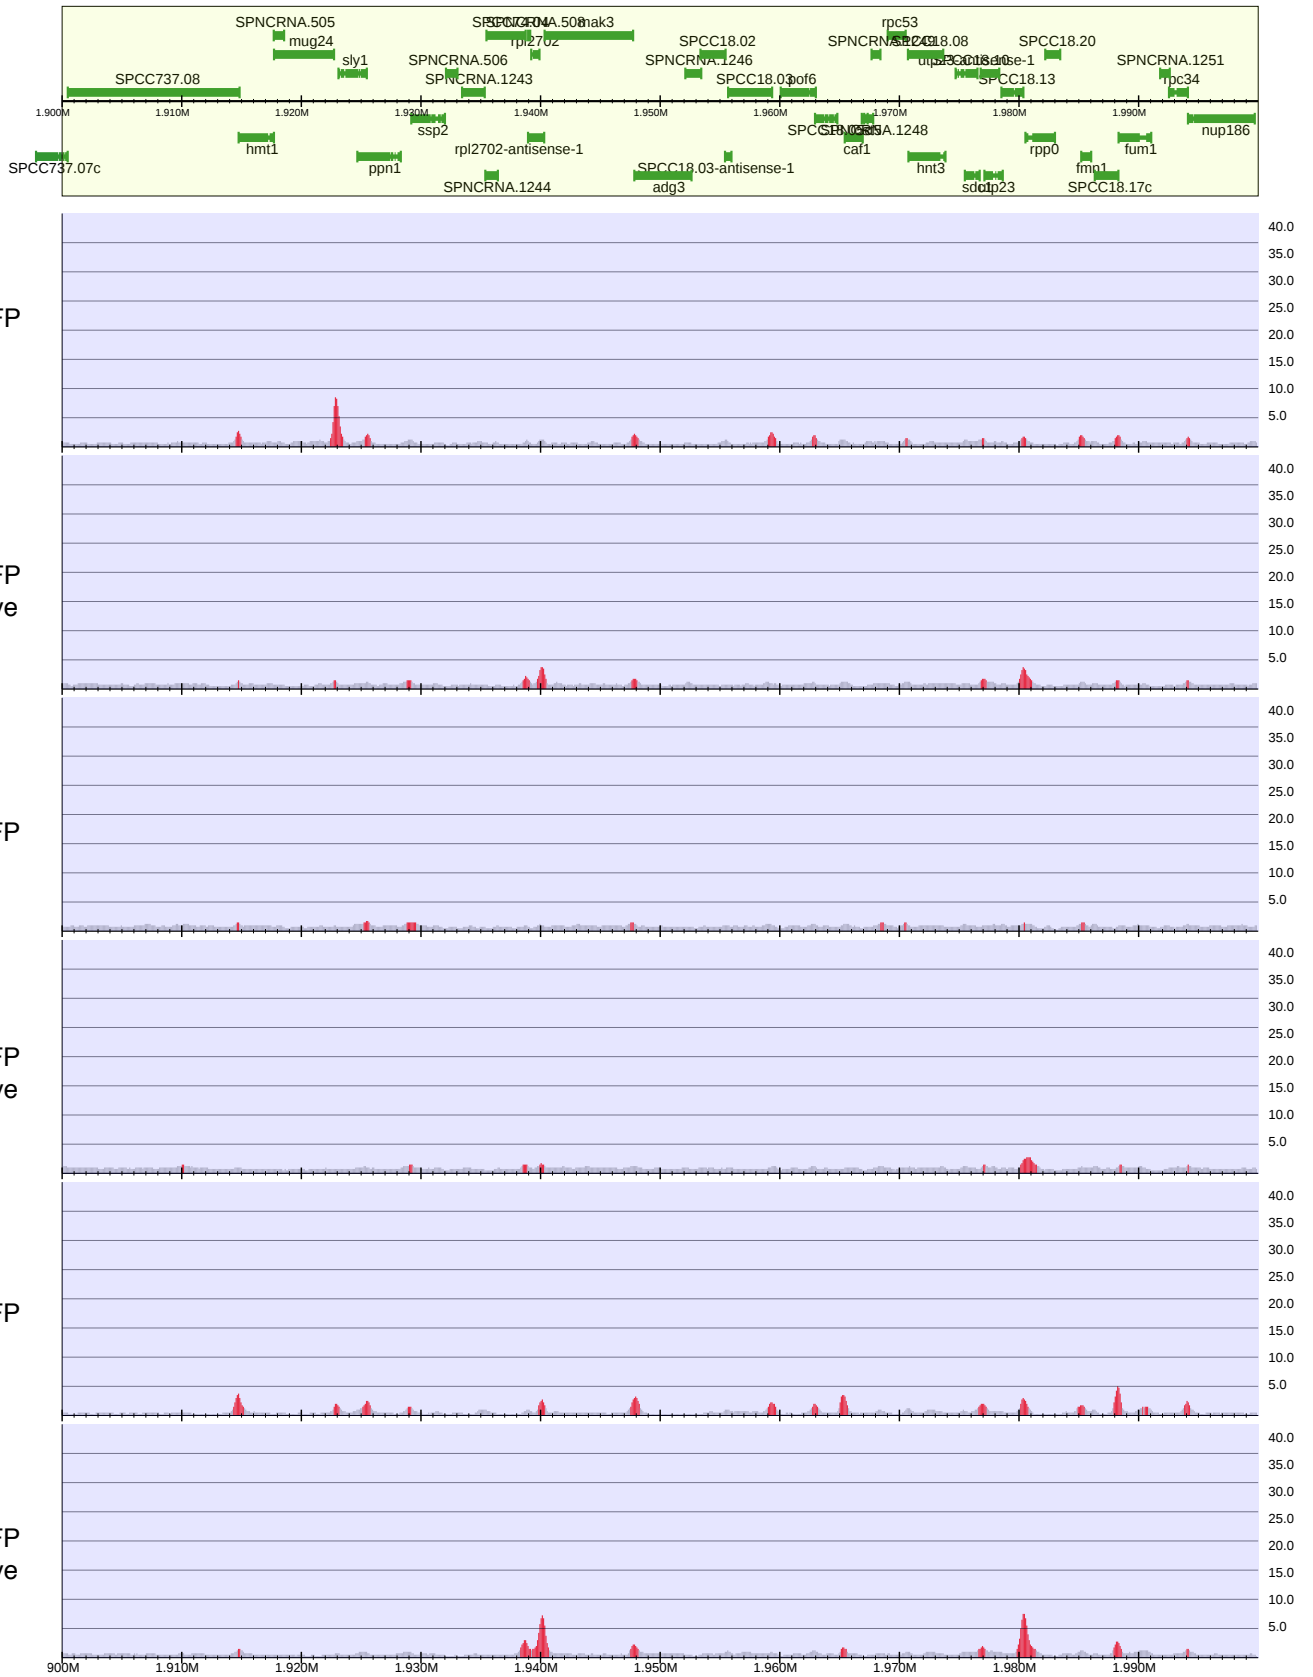

III\_1\_21

— coding  
— noncoding

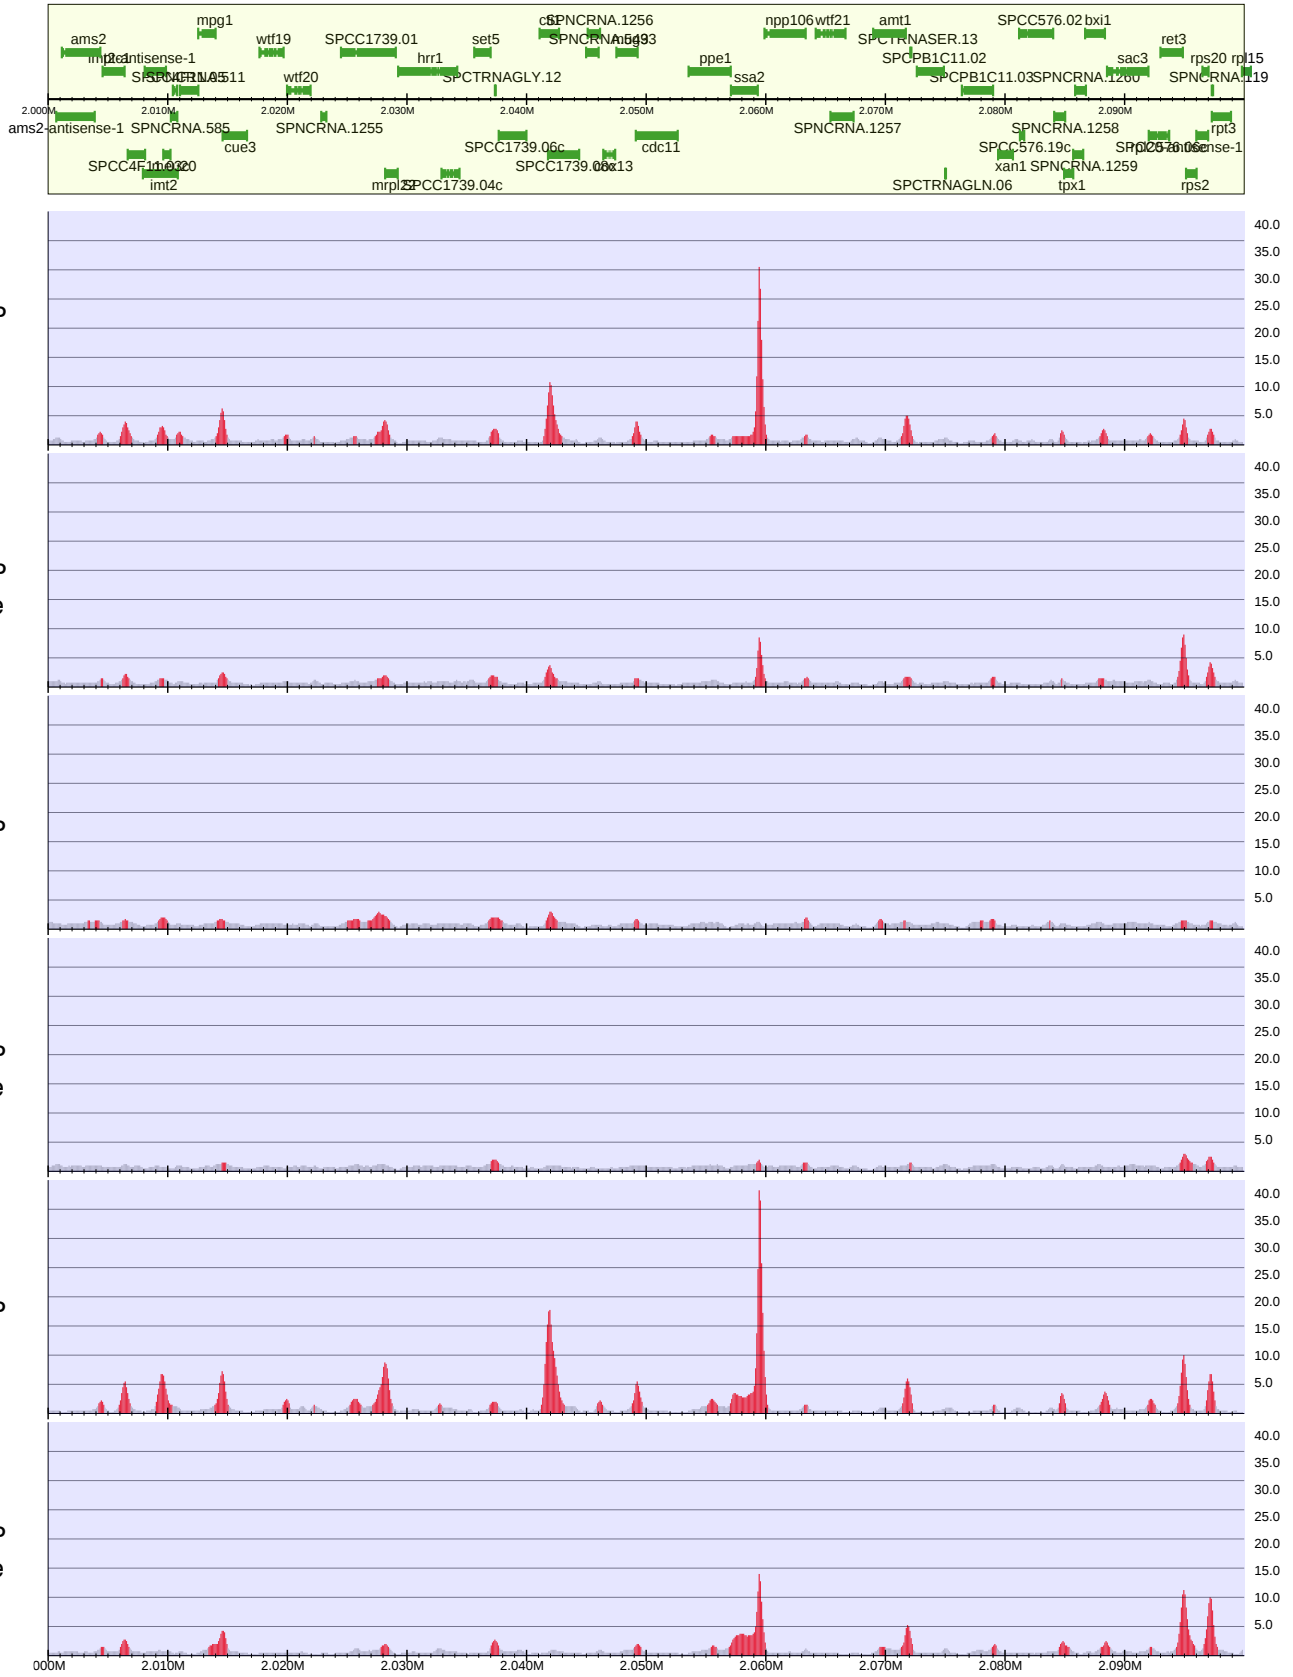

III\_1\_22

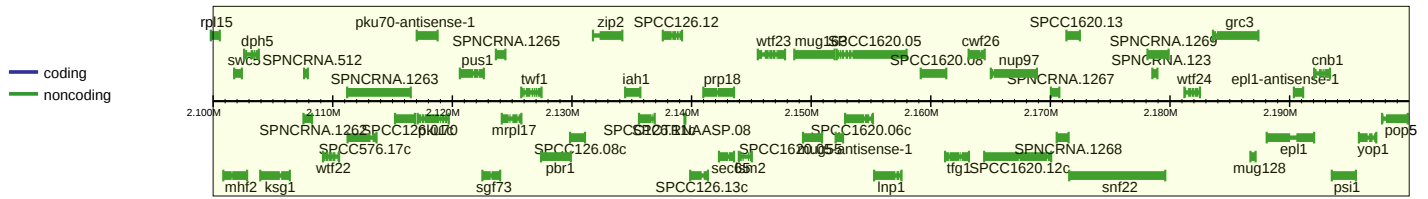

Rhn1-GFP  
meiotic

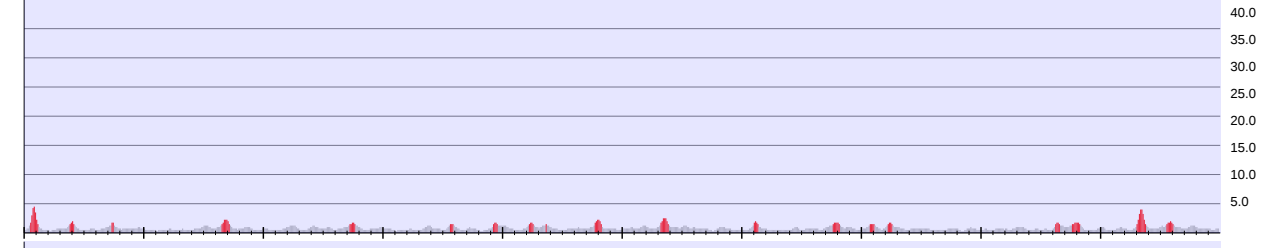

Rhn1-GFP  
vegetative

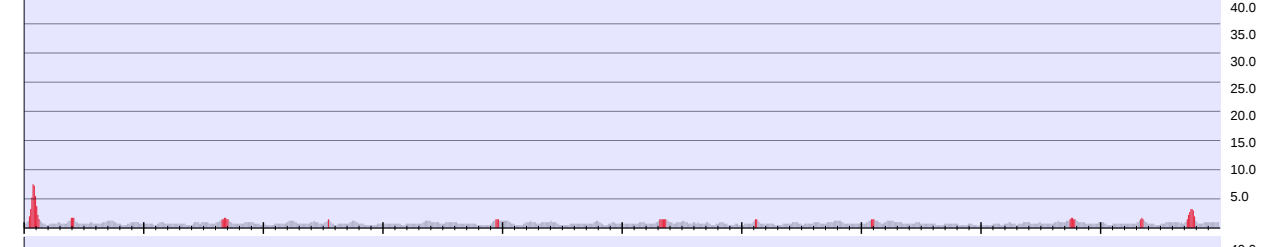

Pab2-GFP  
meiotic

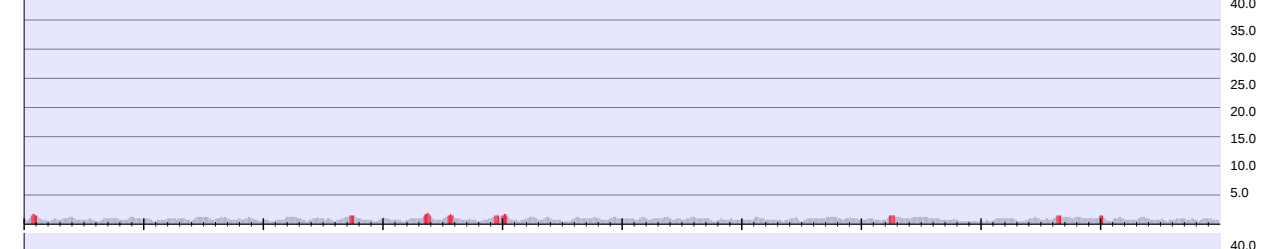

Pab2-GFP  
vegetative

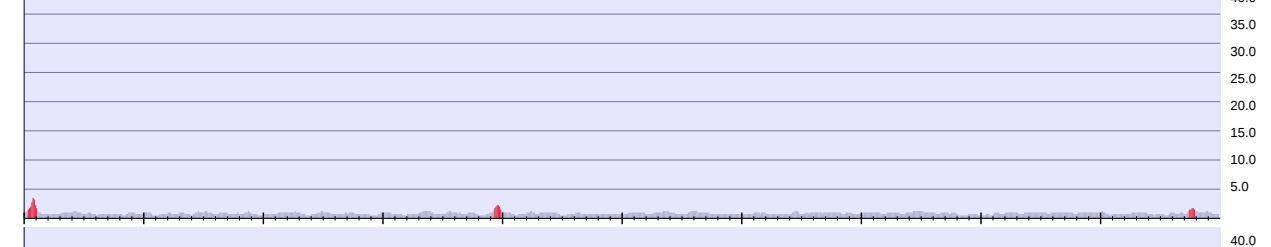

Seb1-GFP  
meiotic

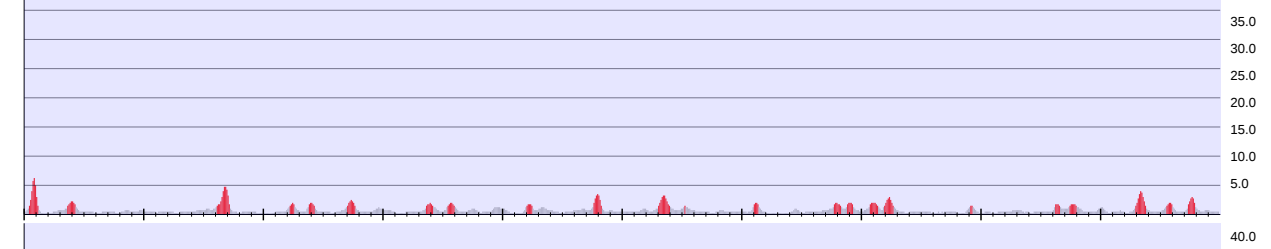

Seb1-GFP  
vegetative

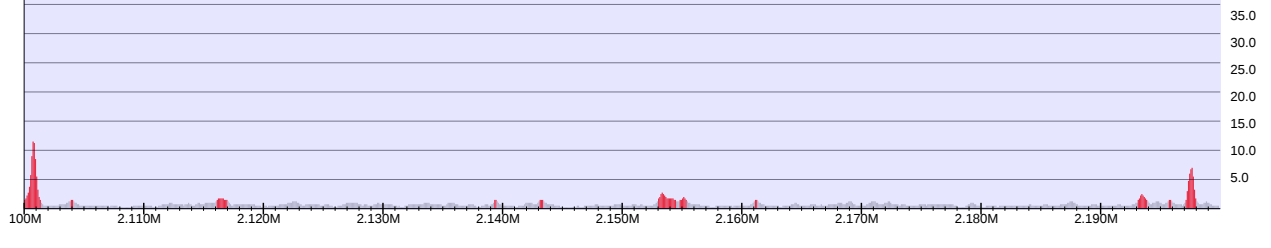





III\_1\_24

coding  
noncoding

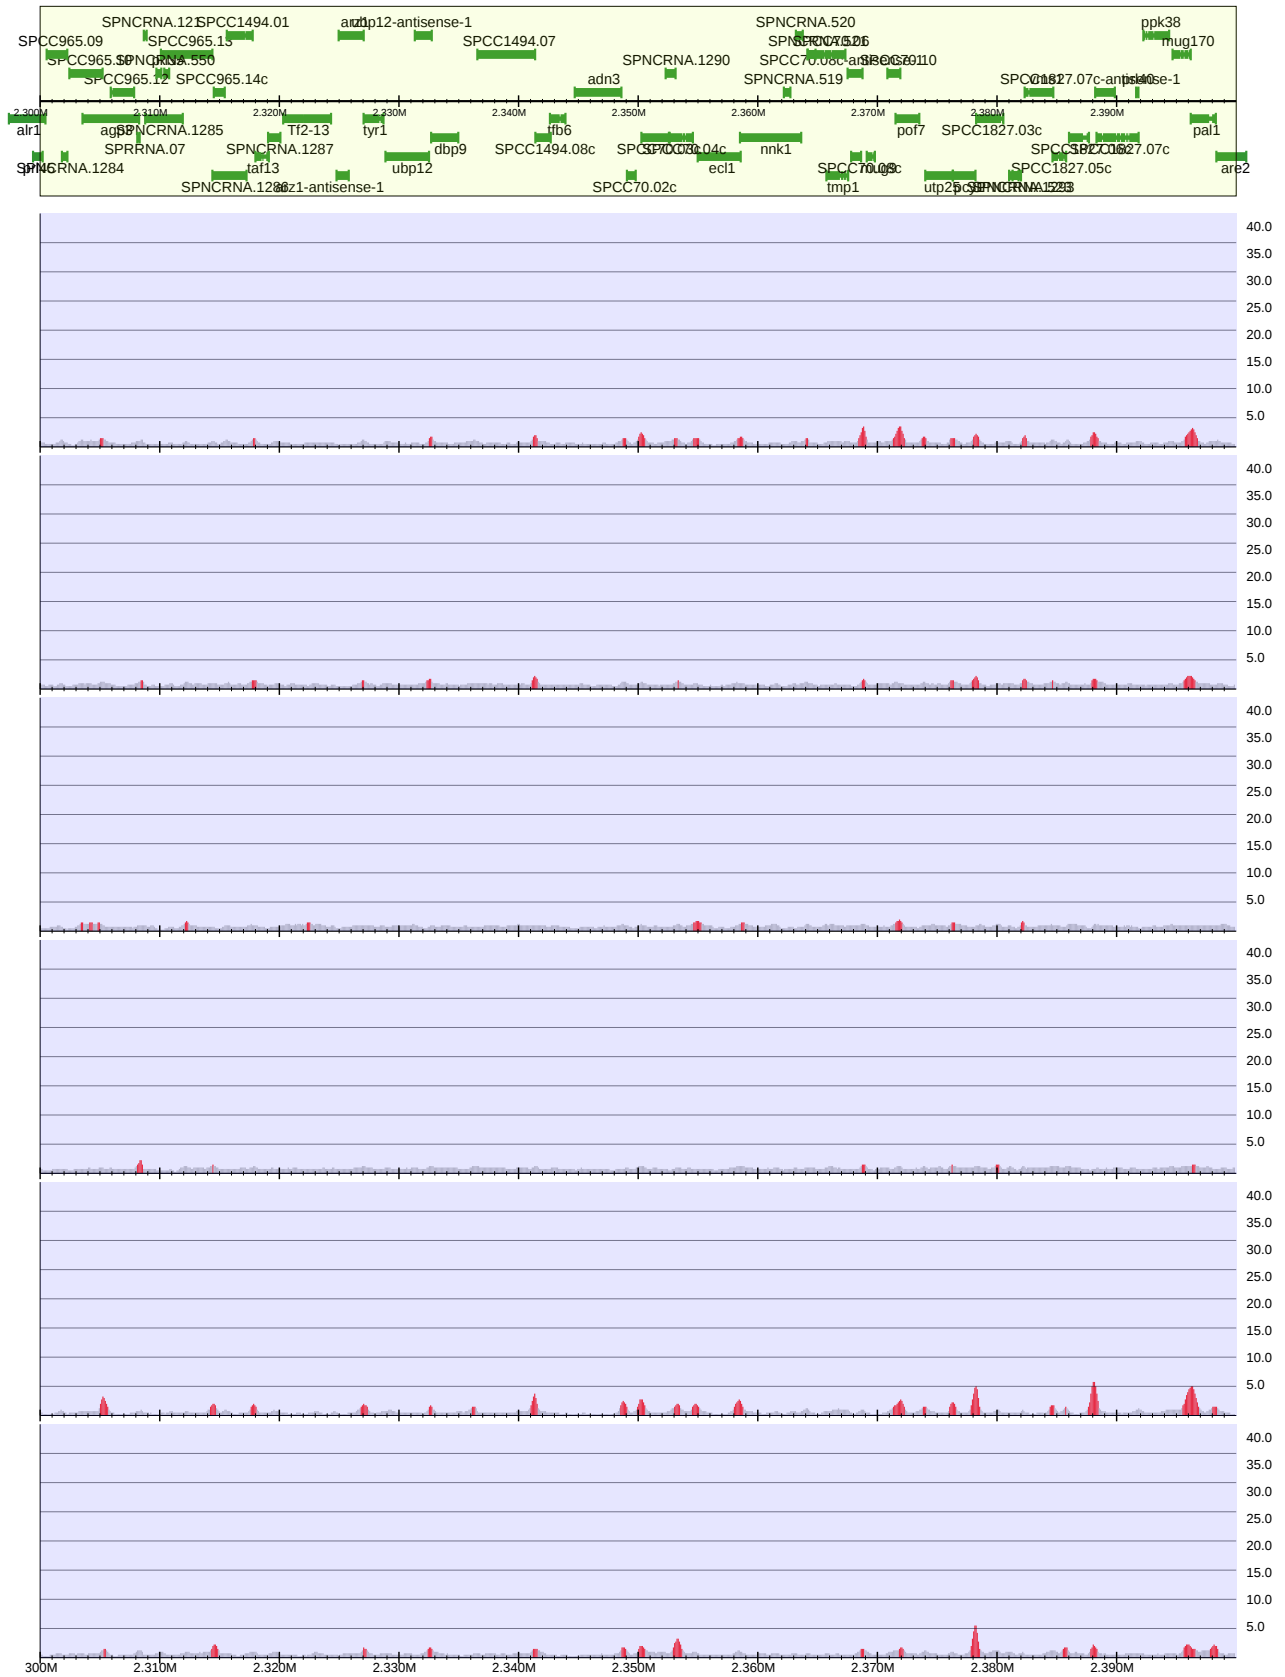

III\_1\_25

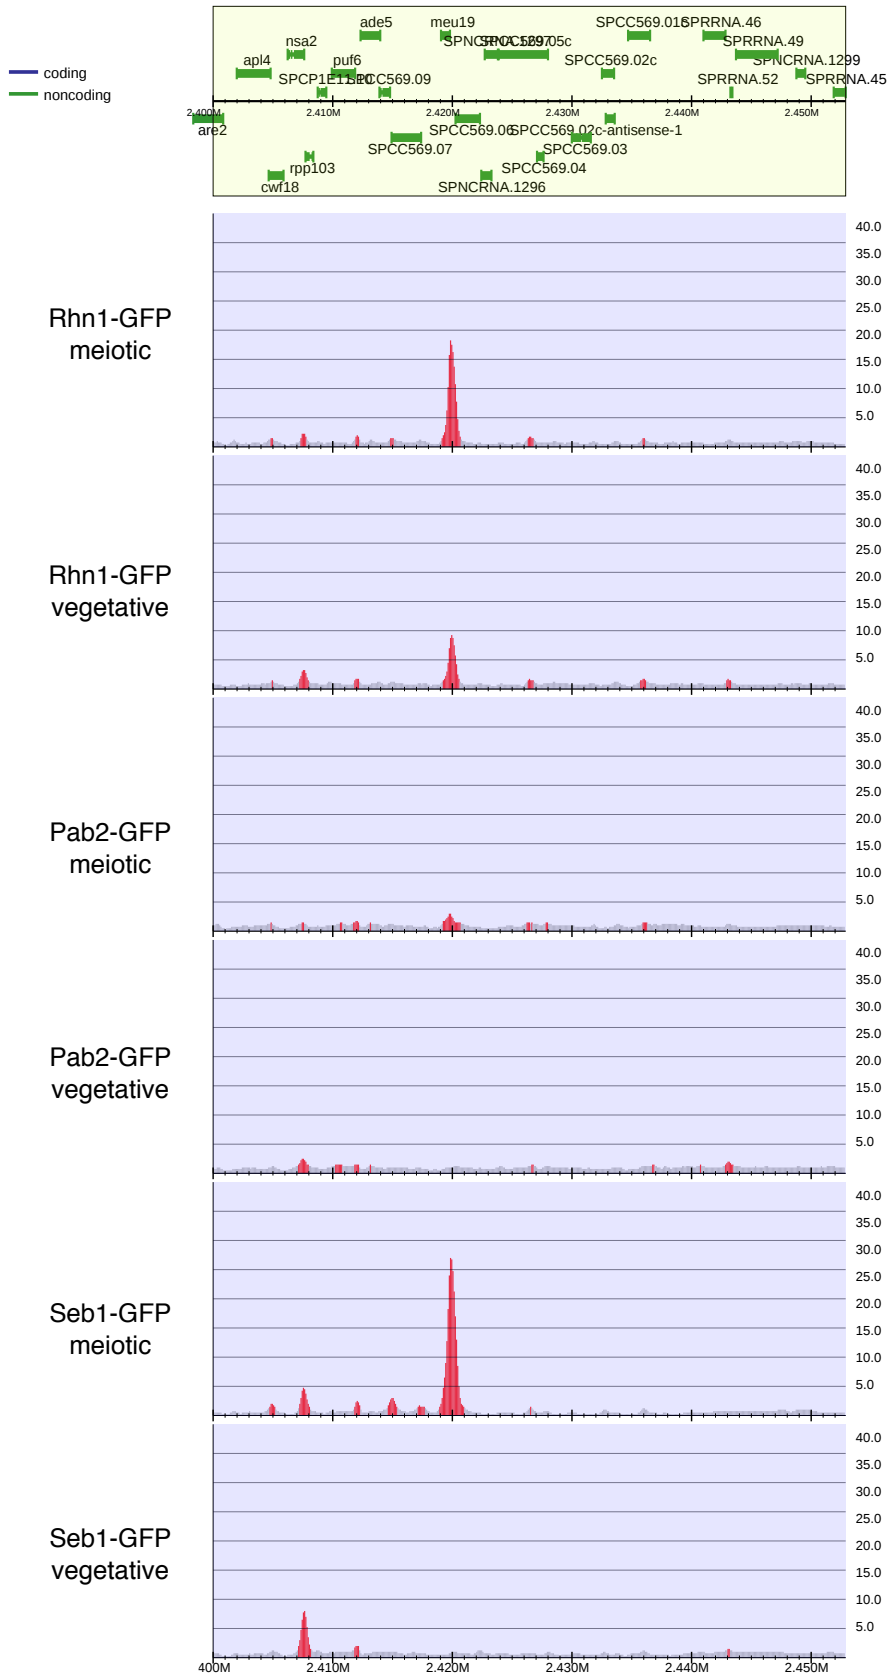

MT\_1

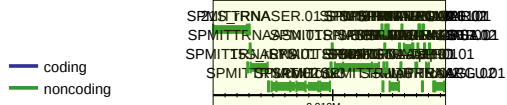

Rhn1-GFP  
meiotic

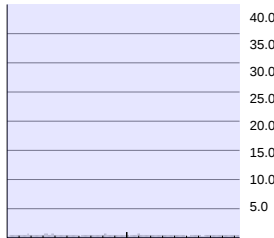

Rhn1-GFP  
vegetative

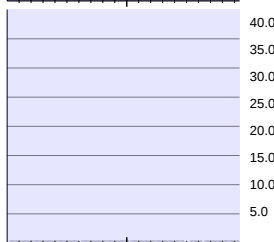

Pab2-GFP  
meiotic

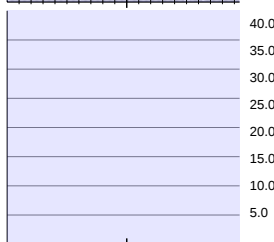

Pab2-GFP  
vegetative

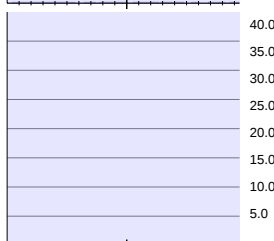

Seb1-GFP  
meiotic

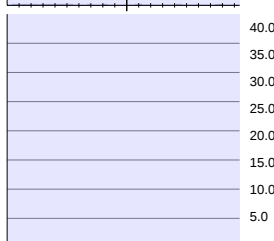

Seb1-GFP  
vegetative

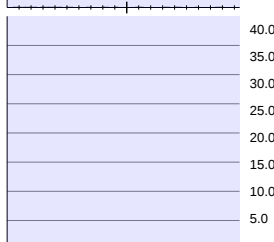

MTR\_1

— coding  
— noncoding

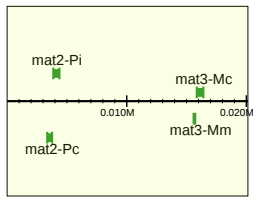

Rhn1-GFP  
meiotic

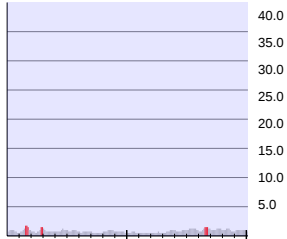

Rhn1-GFP  
vegetative

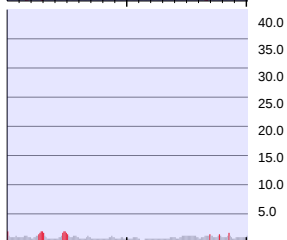

Pab2-GFP  
meiotic

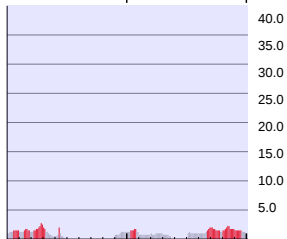

Pab2-GFP  
vegetative

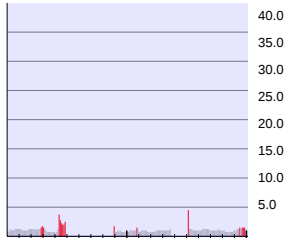

Seb1-GFP  
meiotic

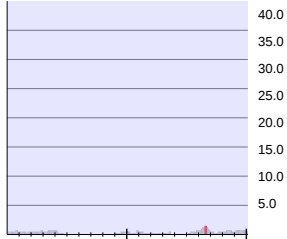

Seb1-GFP  
vegetative

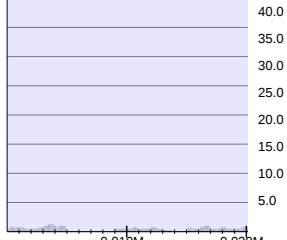

AB325691\_1

coding  
noncoding

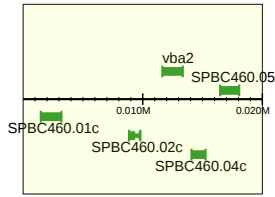

Rhn1-GFP  
meiotic

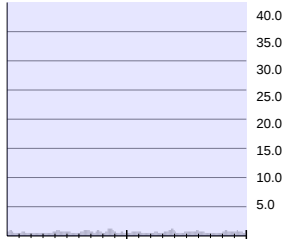

Rhn1-GFP  
vegetative

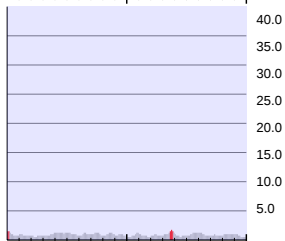

Pab2-GFP  
meiotic

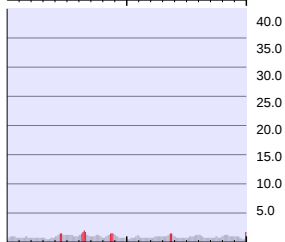

Pab2-GFP  
vegetative

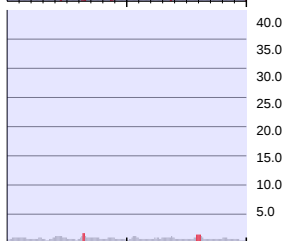

Seb1-GFP  
meiotic

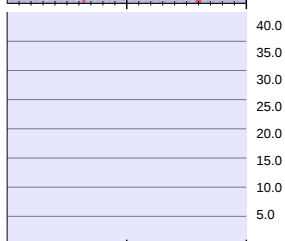

Seb1-GFP  
vegetative

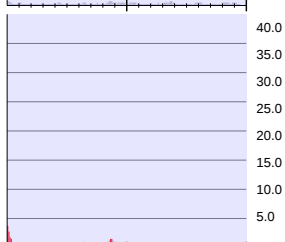

Supplement: 41467_2019_13609_MOESM4_ESM.pdf [file 41467_2019_13609_MOESM4_ESM.pdf]
