# Supplementary material for: Chromosome-associated RNA–protein complexes promote pairing of homologous chromosomes during meiosis in Schizosaccharomyces pombe
Source: PubMed Central journal article supplement (PMC6898681; doi:10.1038/s41467-019-13609-0), 2019-12-06
Supplement: 41467_2019_13609_MOESM1_ESM.pdf [file 41467_2019_13609_MOESM1_ESM.pdf]

Chromosome-associated RNA-protein complexes promote pairing of homologous chromosomes during meiosis in *Schizosaccharomyces pombe*

Ding *et al.*

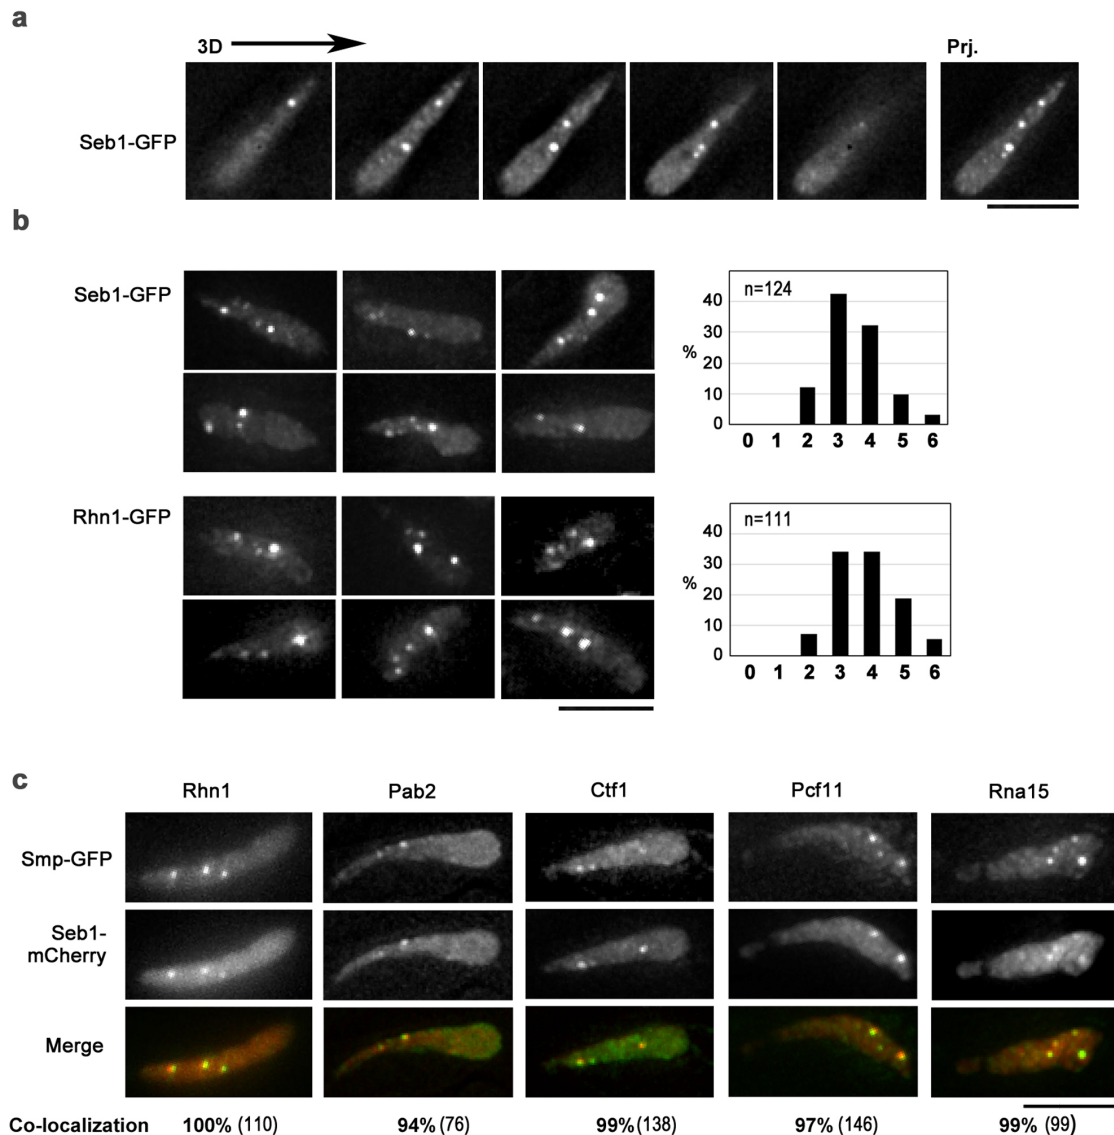

### Supplementary Figure 1. Chromosomal accumulation of Smp proteins

(a) Optical section images of Seb1-GFP in the horsetail nucleus were acquired at a 0.35  $\mu\text{m}$  focus interval. Optical section images were projected to produce the projection image (Prj). (b) Examples of projection images for Seb1-GFP and Rhn1-GFP (left). The number distribution of Seb1-GFP and Rhn1-GFP dots (right). The “dots” were identified using the 2D polygon finder function of softWoRx software (GE Healthcare); the fluorescence intensity threshold of a “dot” was set as 1.5 times higher than the average intensity in the nucleus. “n” in the bar graphs represents the number of horsetail nuclei examined. Source data are provided as a Source Data 6. (c) Co-localization of GFP-fused Smp proteins with Seb1-mCherry in the horsetail nucleus. The number below indicates percentage of Smp dots colocalized with Seb1 dots; the number in parentheses indicates the number of cells examined. Scale bars represent 5  $\mu\text{m}$  (a-c).

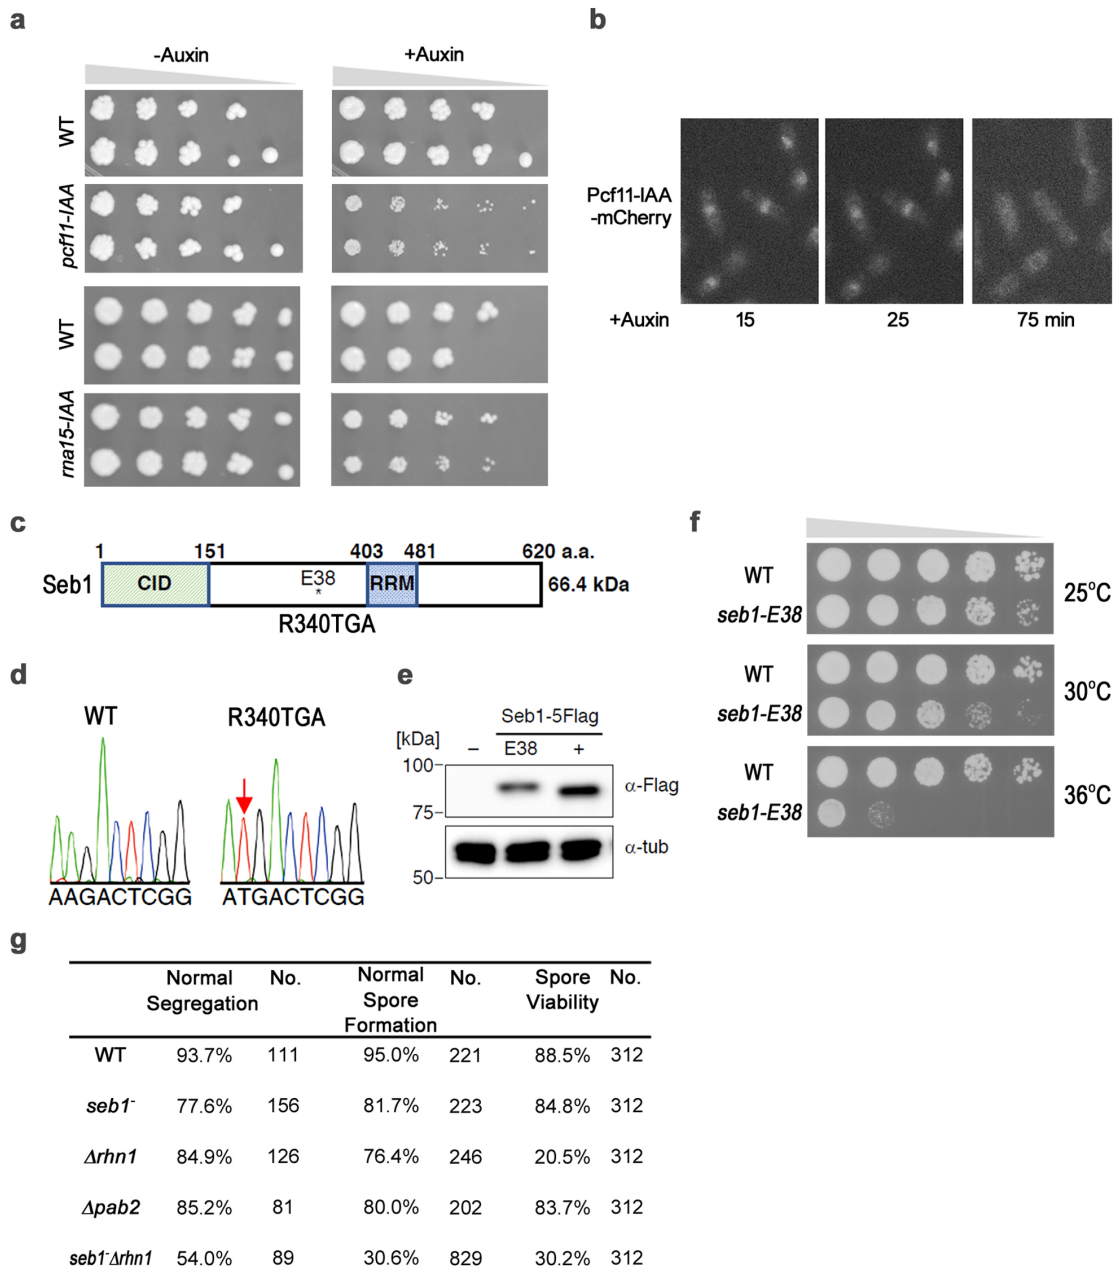

## Supplementary Figure 2. Mutant characterization

**(a)** Growth assay of Pcf11 and Rna15 degron strains (*pcf11-IAA*, *rna15-IAA*) in the culture medium with or without Auxin. The plates were incubated for 3 days at 30°C.

**(b)** An example of live cell imaging of Pcf11-IAA-mCherry degradation after adding Auxin and incubation at 26°C in EMM2-N medium. The fluorescent signals disappeared from the nuclei at 75 min after incubation in the medium containing Auxin.

**(c)** Diagram of Seb1 protein feature. CID: CTD-interacting domain. RRM: RNA recognition motif. \*: E38 (R340TGA) mutation.

**(d)** Sequencing of *seb1-E38* mutation. The *E38* allele bears a nonsense mutation converting R340 to a termination codon (TGA). **(e)** Immunoblot analysis of the Seb1-

E38 mutant.  $\alpha$ -Tubulin was used as a loading control. (-) No tag strain (FY648), (E38) Seb1-E38-5Flag (EON125), (+) Seb1-5Flag (EON06). Primary antibody: ( $\alpha$ -Flag) anti-Flag M2 antibody (1/1000 dilution; A8592, Merck), ( $\alpha$ -tub) anti- $\alpha$ -tubulin (1/1000 dilution; T5168, Merck). Secondary antibody: Peroxidase-conjugated AffiPure anti-mouse IgG (1/1000 dilution; 515-035-072, Jackson). The Seb1-E38 mutant strain expresses a reduced amount of the full-length Seb1 protein. Source data are provided as a Source Data file S2. **(f)** Seb1-E38 growth assay. Five-fold-diluted cultures of the indicated strains were plated on YEA medium plates and incubated for 2–3 days at the indicated temperature. **(g)** Meiotic chromosome segregation (after meiotic division II, using *cen2-lacO/lacI-GFP* as marker), spore formation and spore viability in wild type cells and Smp mutants.

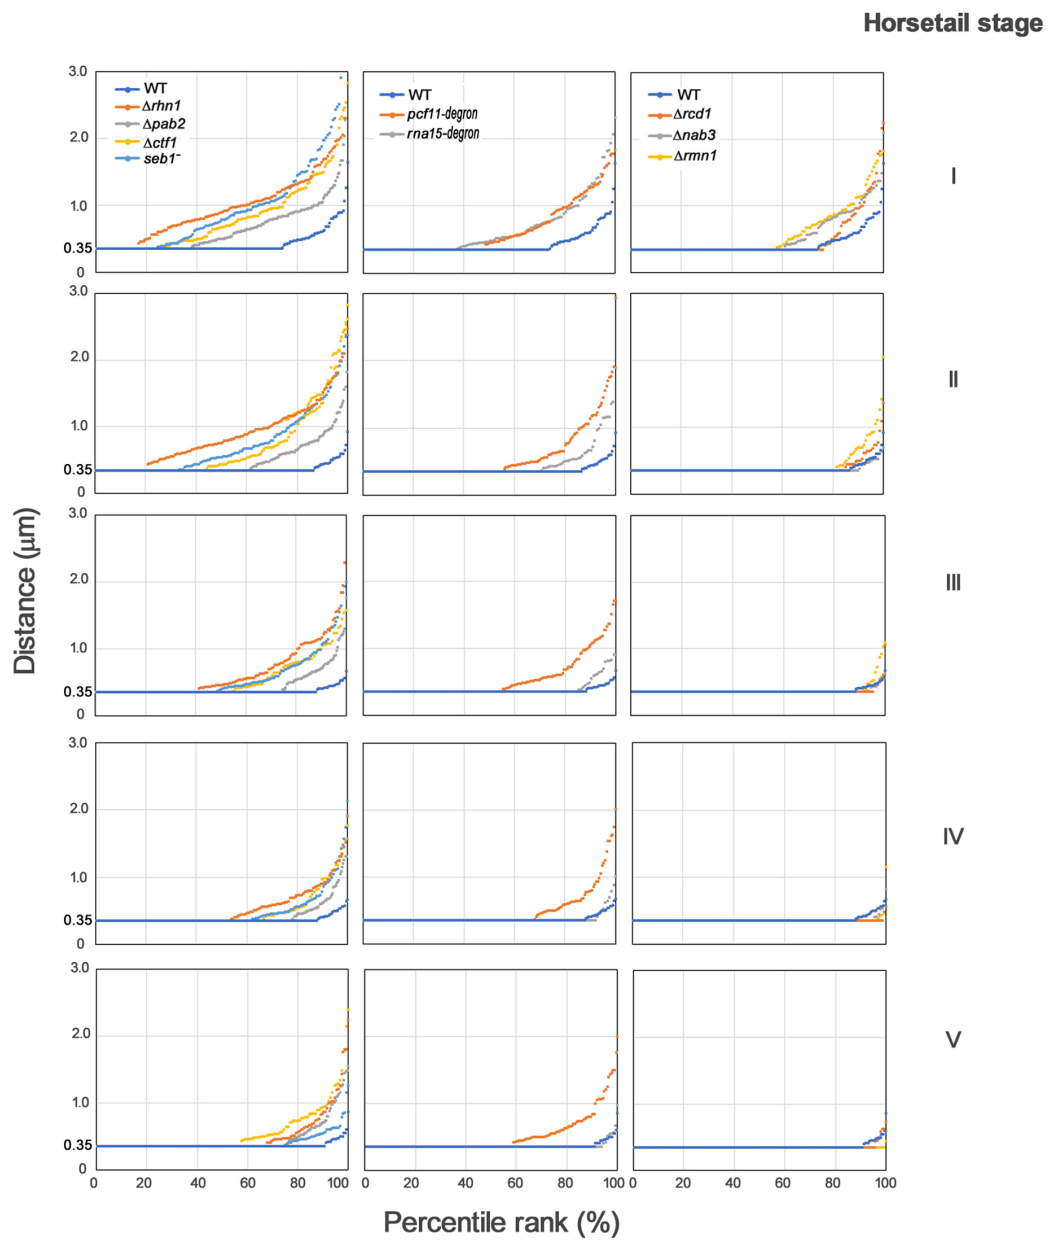

**Supplementary Figure 3. Percentile plot of the distance**

Percentile rank plots of the distance between homologous *sme2* loci in every horsetail stage shown in Fig. 1c. The threshold of pairing is 0.35  $\mu\text{m}$  as labeled on the Y axis. Source data are provided as a Source Data file 1b.

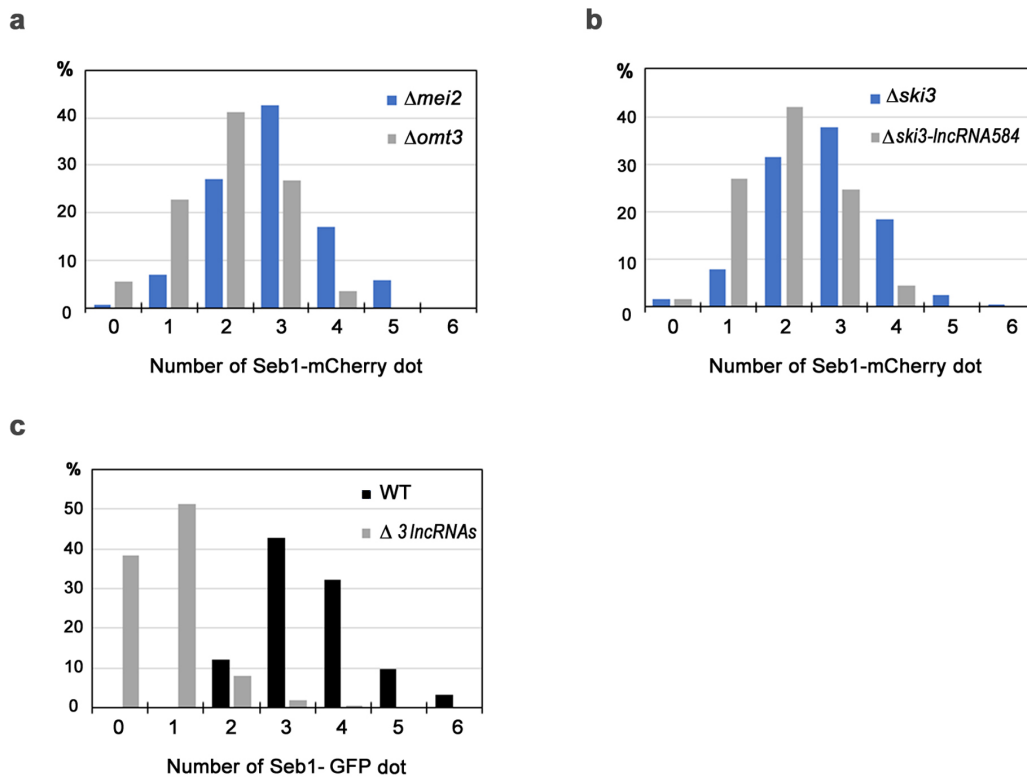

#### Supplementary Figure 4. Quantification of the Smp protein dots

(a) Number of Seb1-mCherry dots in the horsetail nuclei of  $\Delta mei2$  and  $\Delta omt3$  cells. (b) Number of Seb1-mCherry dots in the horsetail nuclei of  $\Delta ski3$  and  $\Delta ski3-lncRNA584$  cells. (c) Number of Seb1-GFP dots in the horsetail nuclei of wild type and in a strain lacking all the three lncRNAs, *sme2* RNA, *omt3* RNA, and lncRNA584. Source data are provided as a Source Data file S4.

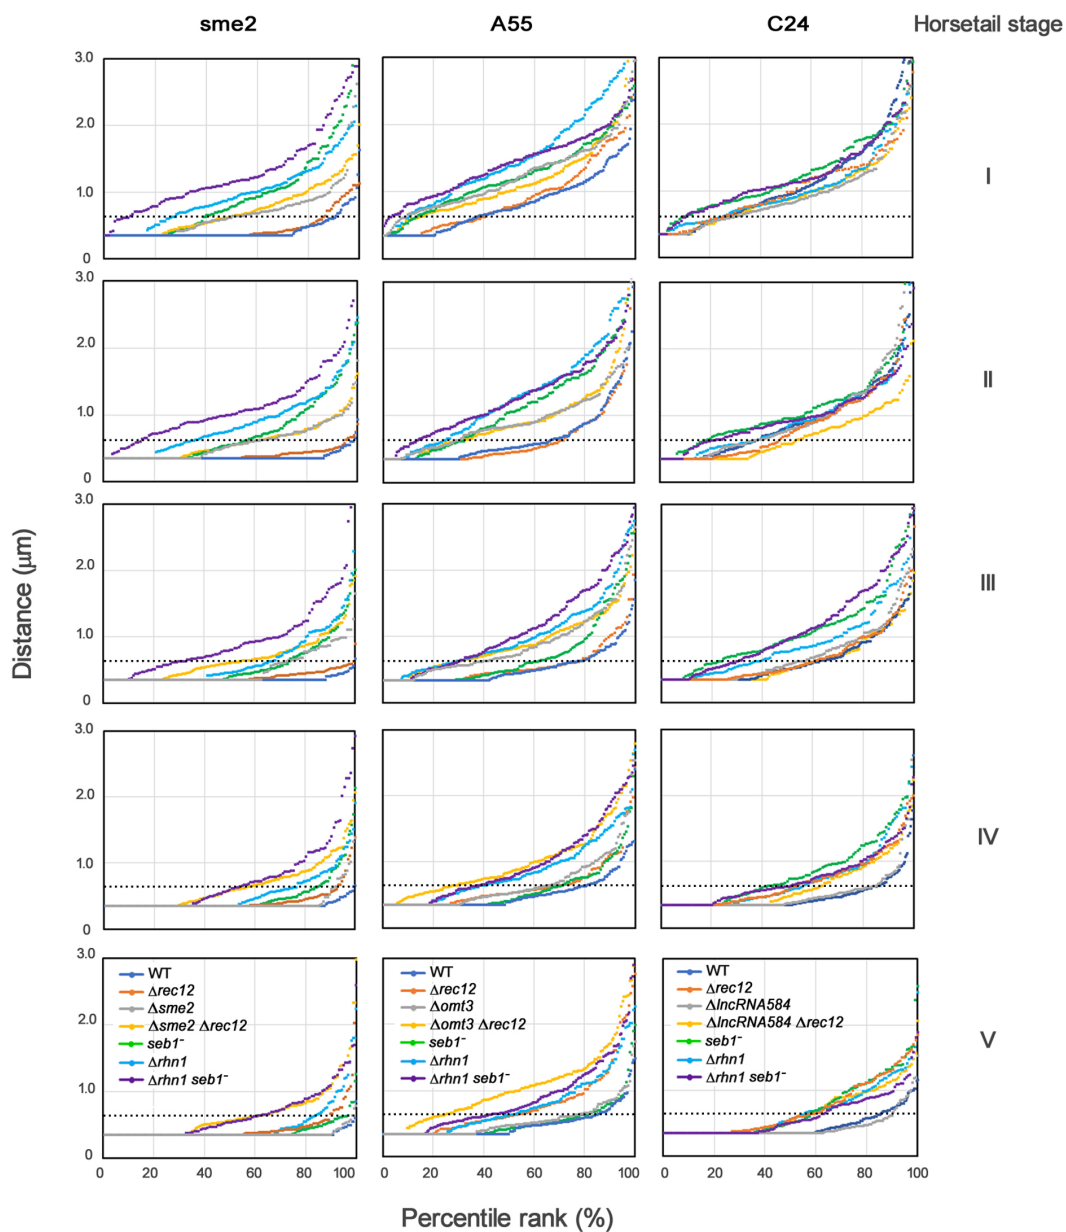

### Supplementary Figure 5. Percentile plot of the distance

Percentile rank plots of the distance between homologous *sme2*, A55 and C24 loci in every horsetail stage shown in Fig. 4. The dotted line at 0.67  $\mu\text{m}$  on the Y axis indicates the threshold of pairing. Source data are provided as a Source Data file 4.

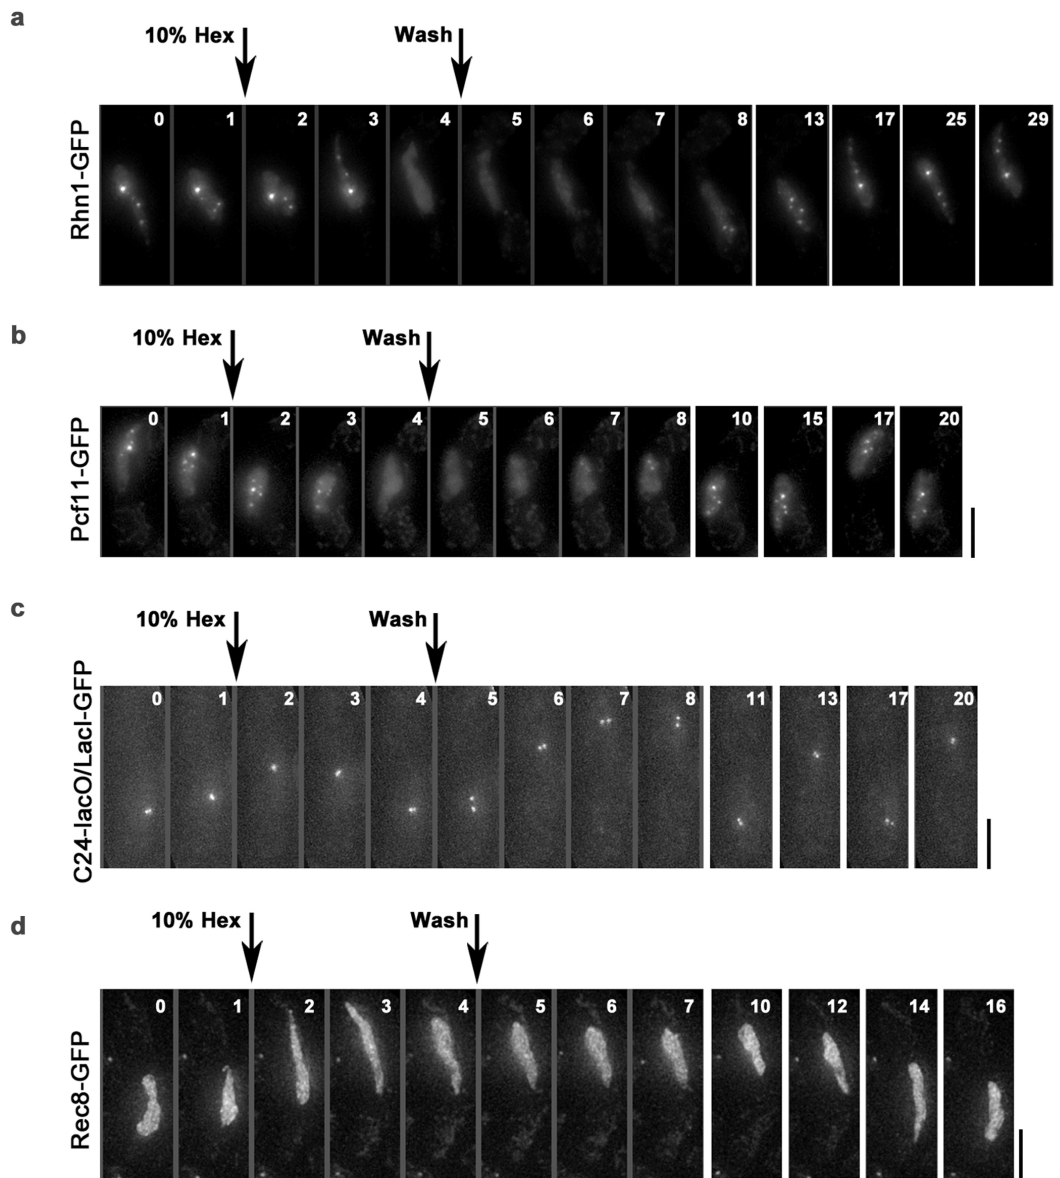

**Supplementary Figure 6. Liquid-phase separation of Smp proteins and its role in pairing of homologous loci**

(a) Selected projected time-lapse images of Rhn1-GFP in living cells at the horsetail stage. (b) Selected projected time-lapse images of Pcf11-GFP in living cells at the horsetail stage. (c) Selected projected time-lapse images of C24-lacO/LacI-GFP in living cells at the horsetail stage. (d) Selected projected time-lapse images of Rec8-GFP in living cells at the horsetail stage. Three-dimensional images were taken every minute. Microfluidic yeast plates (CellASIC) were used for cell culture on the microscope stage. 1,6-Hexanediol (10%) was added or removed, as indicated by the arrows. The solution in the cell culture chamber was changed in < 1 min. The scale bars represent 5  $\mu$ m.



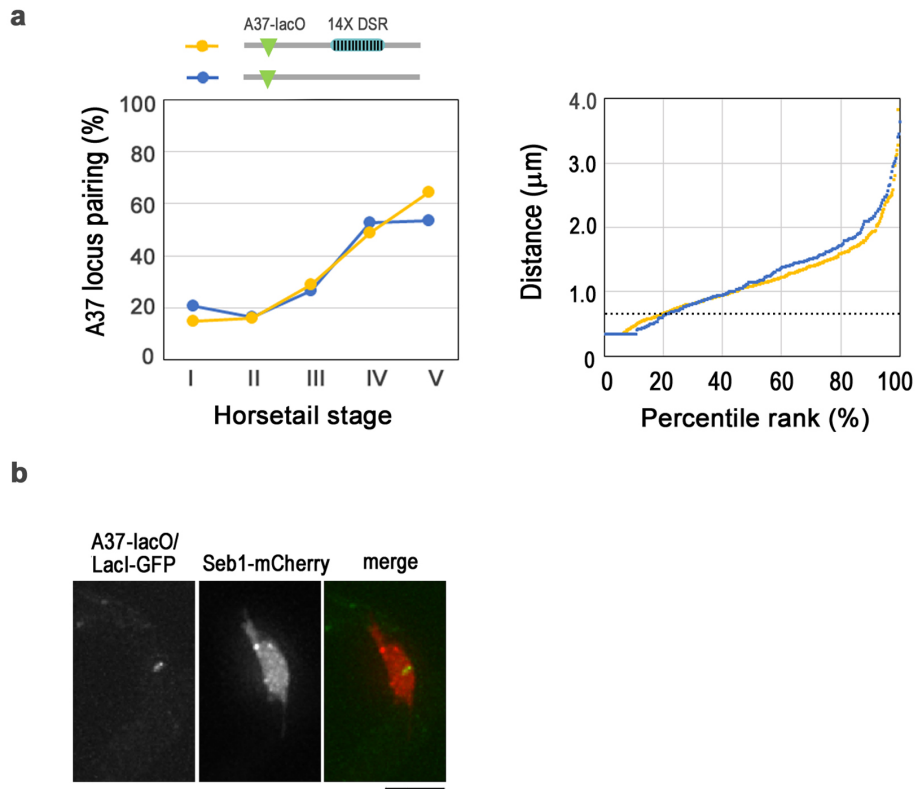

**Supplementary Figure 7. Effect of DSR repeats on homologous pairing.**

**(a)** Pairing frequency at the A37 locus in wild type (blue) and in the 14×DSR motif (TTAAAC) repeats inserted strain (yellow) (left panel). A DNA fragment containing 4×U1A and 14×DSR sequences<sup>28</sup> was inserted in the genome at about 60 kb away from A37 *lacO* insertion (Supplemental Table 1). Right panel shows percentile rank plots of the distance between the A37 loci in the first 3 substages. The dotted line at 0.67  $\mu\text{m}$  on the Y axis indicates the threshold of pairing. Source data are provided as a Source Data file S7. **(b)** Double staining of A37-*lacO*/LacI-GFP with Seb1-mCherry. No Seb1-mCherry dot was formed at the A37 locus.

**Supplementary Table 1. Insertion positions of *lacO* arrays in *lacO*/LacI-GFP library**

| Chromosome I |                  | Chromosome II |                  | Chromosome III |                  |
|--------------|------------------|---------------|------------------|----------------|------------------|
| Name         | Genomic position | Name          | Genomic position | Name           | Genomic position |
| A01          | 50946            | B01           | 110029           | C01            | 42728            |
| A02          | 94498            | B02           | 159887           | C02            | 113974           |
| A03          | 217912           | B03           | 277440           | C03            | 214549           |
| A04          | 272653           | B04           | 343050           | C04            | 319994           |
| A05          | 325930           | B05           | 449000           | C05            | 397988           |
| A06          | 425597           | B06           | 539260           | C06            | 505789           |
| A07          | 463596           | B07           | 636874           | C07            | 558957           |
| A08          | 553980           | B08           | 739653           | C08            | 666416           |
| A09          | 639405           | B09           | 828428           | C09            | 756290           |
| A10          | 667382           | B10           | 934372           | C10            | 853882           |
| A11          | 765526           | B11           | 1006688          | C11            | 971822           |
| A12          | 842624           | B12           | 1028562          | C12            | 1064740          |
| A13          | 912607           | B13           | 1136375          | C13            | 1140428          |
| A14          | 981422           | B14           | 1224061          | C14            | 1244477          |
| A15          | 1027014          | B15           | 1277831          | C15            | 1316291          |
| A16          | 1089958          | B16           | 1363490          | C16            | 1448223          |
| A17          | 1210928          | B17           | 1463491          | C17            | 1524066          |
| A18          | 1276130          | B18           | 1554538          | C18            | 1632149          |
| A19          | 1329091          | B19           | 1648000          | C19            | 1727794          |
| A20          | 1381967          | B20           | 1727771          | C20            | 1822398          |
| A21          | 1485261          | B21           | 1823968          | C21            | 1928730          |
| A22          | 1572568          | B22           | 1915147          | C22            | 2023785          |
| A23          | 1664658          | B23           | 1962938          | C23            | 2107032          |
| A24          | 1760902          | B24           | 2074884          | C24            | 2209985          |
| A25          | 1866360          | B25           | 2159853          | C25            | 2335879          |
| A26          | 1921920          | B26           | 2254416          | C26            | 2418000          |
| A27          | 2052316          | B27           | 2366555          |                |                  |
| A28          | 2110800          | B28           | 2470824          |                |                  |
| A29          | 2215220          | B29           | 2553418          |                |                  |
| A30          | 2304577          | B30           | 2647289          |                |                  |
| A31          | 2385377          | B31           | 2750390          |                |                  |
| A32          | 2438381          | B32           | 2847916          |                |                  |
| A33          | 2527713          | B33           | 2938954          |                |                  |
| A34          | 2600539          | B34           | 3040956          |                |                  |
| A35          | 2669250          | B35           | 3140566          |                |                  |
| A36          | 2786827          | B36           | 3237304          |                |                  |
| A37          | 2882384          | B37           | 3337527          |                |                  |
| A38          | 2937494          | B38           | 3516819          |                |                  |
| A39          | 2996013          | B39           | 3530977          |                |                  |
| A40          | 3059909          | B40           | 3615774          |                |                  |
| A41          | 3184877          | B41           | 3659380          |                |                  |
| A42          | 3281070          | B42           | 3762502          |                |                  |
| A43          | 3404852          | B43           | 3862500          |                |                  |
| A44          | 3497734          | B44           | 3925880          |                |                  |
| A45          | 3559368          | B45           | 3987400          |                |                  |
| A46          | 3675200          | B46           | 4110630          |                |                  |
| A47          | 3739076          | B47           | 4172323          |                |                  |
| A48          | 3830016          | B48           | 4255523          |                |                  |
| A49          | 3920465          | B49           | 4344090          |                |                  |
| A50          | 4004001          | B50           | 4403495          |                |                  |
| A51          | 4106221          |               |                  |                |                  |
| A52          | 4196586          |               |                  |                |                  |
| A53          | 4299146          |               |                  |                |                  |
| A54          | 4450168          |               |                  |                |                  |
| A55          | 4510983          |               |                  |                |                  |
| A56          | 4577519          |               |                  |                |                  |
| A57          | 4648678          |               |                  |                |                  |
| A58          | 4701979          |               |                  |                |                  |
| A59          | 4782589          |               |                  |                |                  |
| A60          | 4852463          |               |                  |                |                  |
| A61          | 4964028          |               |                  |                |                  |
| A62          | 5024382          |               |                  |                |                  |
| A63          | 5096313          |               |                  |                |                  |
| A64          | 5177335          |               |                  |                |                  |
| A65          | 5256188          |               |                  |                |                  |
| A66          | 5393083          |               |                  |                |                  |
| A67          | 5479451          |               |                  |                |                  |

**Supplementary Table 2. Strains used in this study**

| <b>Figure 1a</b>   |                                                                                                                                                                                                 |
|--------------------|-------------------------------------------------------------------------------------------------------------------------------------------------------------------------------------------------|
| YY982              | <i>h90 ade6-216 leu1 mei2<sup>+</sup>-mCherry::HygR leu1<sup>+</sup>::nmt1p-rcd1<sup>+</sup>-YFP-FLAG-His6</i>                                                                                  |
| YY630              | <i>h90 ade6-216 leu1 ura4 lys1 mei2<sup>+</sup>-mCherry::HygR pTB46(seb1<sup>+</sup>-GFP)</i>                                                                                                   |
| YY660              | <i>h90 ade6-216 leu1 mei2<sup>+</sup>-mCherry::HygR leu1<sup>+</sup>::nmt1p-nab3<sup>+</sup>-YFP-FLAG-His6</i>                                                                                  |
| YW372-1C           | <i>h90 ade6-216 leu1 lys1 ura4-D18 mei2<sup>+</sup>-mCherry::HygR rnm1<sup>+</sup>-GFP::KanR</i>                                                                                                |
| YW371-1A           | <i>h90 ade6-216 leu1 lys1 ura4-D18 mei2<sup>+</sup>-mCherry::HygR pab2<sup>+</sup>-GFP::KanR</i>                                                                                                |
| YY983              | <i>h90 ade6-216 leu1 mei2<sup>+</sup>-mCherry::HygR leu1<sup>+</sup>::nmt1p-rna15<sup>+</sup>-YFP-FLAG-His6</i>                                                                                 |
| YY984              | <i>h90 ade6-216 leu1 mei2<sup>+</sup>-mCherry::HygR leu1<sup>+</sup>::nmt1p-rhn1<sup>+</sup>-YFP-FLAG-His6</i>                                                                                  |
| YY990              | <i>h90 ade6-216 leu1 mei2<sup>+</sup>-mCherry::HygR leu1<sup>+</sup>::nmt1p-pcf11<sup>+</sup>-YFP-FLAG-His6</i>                                                                                 |
| YW370-1A           | <i>h90 ade6-216 leu1 lys1 ura4-D18 mei2<sup>+</sup>-mCherry::HygR pla1<sup>+</sup>-GFP::KanR</i>                                                                                                |
| YY991              | <i>h90 ade6-216 leu1 mei2<sup>+</sup>-mCherry::HygR leu1<sup>+</sup>::nmt1p-ctf1<sup>+</sup>-YFP-FLAG-His6</i>                                                                                  |
| <b>Figure 1b</b>   |                                                                                                                                                                                                 |
| YY548-13C          | <i>ade6-216 leu1 ura4-D18 sme2proxy[::ura4<sup>+</sup>- KanR-lacOp] his7<sup>+</sup>::LacI-GFP</i>                                                                                              |
| YW002              | <i>h90 ade6-216 leu1 ura4-D18 sme2proxy[::ura4<sup>+</sup>- KanR-lacOp] his7<sup>+</sup>::LacI-GFP<br/>Δrhn1:: NatR</i>                                                                         |
| YW012              | <i>h90 ade6-216 leu1 ura4-D18 sme2proxy[::ura4<sup>+</sup>- KanR-lacOp] his7<sup>+</sup>::LacI-GFP<br/>Δpab2:: NatR</i>                                                                         |
| YW373-4            | <i>h90 ade6-216 leu1 ura4-D18 sme2proxy[::ura4<sup>+</sup>- KanR-lacOp] his7<sup>+</sup>::LacI-GFP<br/>Δctf1:: HygR</i>                                                                         |
| YW079-5B           | <i>h90 ade6-216 leu1 ura4-DS/E sme2proxy[::ura4<sup>+</sup>- KanR-lacOp] his7<sup>+</sup>::LacI-GFP<br/>seb1-5FLAG- HygR seb1-E38</i>                                                           |
| YW061              | <i>h90 ade6-216 leu1 ura4-D18 sme2proxy[::ura4<sup>+</sup>- KanR-lacOp] his7<sup>+</sup>::LacI-GFP<br/>lys1<sup>+</sup>:: Padh15-skp1-NLS-AtTIR1-NLS pcf11<sup>+</sup>-IAA17-mCherry:: HygR</i> |
| YW162-3            | <i>h90 ade6-216 leu1 ura4-D18 sme2proxy[::ura4<sup>+</sup>- KanR-lacOp] his7<sup>+</sup>::LacI-GFP<br/>lys1<sup>+</sup>:: Padh15-skp1-NLS-AtTIR1-NLS rna15<sup>+</sup>-IAA17-mCherry:: HygR</i> |
| YW001              | <i>h90 ade6-216 leu1 ura4-D18 sme2proxy[::ura4<sup>+</sup>- KanR-lacOp] his7<sup>+</sup>::LacI-GFP<br/>Δrnm1:: NatR</i>                                                                         |
| YW005              | <i>h90 ade6-216 leu1 ura4-D18 sme2proxy[::ura4<sup>+</sup>- KanR-lacOp] his7<sup>+</sup>::LacI-GFP<br/>Δnab3:: NatR</i>                                                                         |
| YW008              | <i>h90 ade6-216 leu1 ura4-D18 sme2proxy[::ura4<sup>+</sup>- KanR-lacOp] his7<sup>+</sup>::LacI-GFP<br/>Δrcd1:: NatR</i>                                                                         |
| <b>Figure 1c</b>   |                                                                                                                                                                                                 |
| YY906              | <i>h90 ade6-216 leu1 ura4-D18 lys1 U1Atag-sme2<sup>+</sup>::HygR aur1::Pnmt1-U1Ap-<br/>mCherry</i>                                                                                              |
| YW006              | <i>h90 ade6-216 leu1 ura4-D18 lys1 U1Atag-sme2<sup>+</sup>::HygR aur1::Pnmt1-U1Ap-<br/>mCherry Δpab2:: NatR</i>                                                                                 |
| YW004              | <i>h90 ade6-216 leu1 ura4-D18 lys1 U1Atag-sme2<sup>+</sup>::HygR aur1::Pnmt1-U1Ap-<br/>mCherry Δrhn1::NatR</i>                                                                                  |
| YW283-16B          | <i>h90 ade6-216 leu1 ura4-DS/E U1Atag-sme2<sup>+</sup>::HygR aur1::Pnmt1-U1Ap-<br/>mCherry seb1-5FLAG-HygR seb1-E38</i>                                                                         |
| YW375-5B           | <i>h90 ade6-216 leu1 ura4-D18 lys1 U1Atag-sme2<sup>+</sup>:: HygR aur1::Pnmt1-U1Ap-<br/>mCherry Δctf1::HygR</i>                                                                                 |
| YW007              | <i>h90 ade6-2106 leu1 ura4-D18 lys1 U1Atag-sme2<sup>+</sup>::HygR aur1::Pnmt1-U1Ap-<br/>mCherry Δnab3:: NatR</i>                                                                                |
| YW009              | <i>h90 ade6-2106 leu1 ura4-D18 lys1 U1Atag-sme2<sup>+</sup>::HygR aur1::Pnmt1-U1Ap-<br/>mCherry Arcd1:: NatR</i>                                                                                |
| YW010              | <i>h90 ade6-2106 leu1 ura4-D18 lys1 U1Atag-sme2<sup>+</sup>::HygR aur1::Pnmt1-U1Ap-<br/>mCherry Δrnm11::NatR</i>                                                                                |
| <b>Figure 2b-d</b> |                                                                                                                                                                                                 |

|           |                                                                                                                                                                                                                                          |
|-----------|------------------------------------------------------------------------------------------------------------------------------------------------------------------------------------------------------------------------------------------|
| YW298     | <i>h90 ade6-210 leu1 ura4-D18 A55[::ura4<sup>+</sup>- KanR-lacOp] his7<sup>+</sup>::LacI-GFP seb1<sup>+</sup>-mCherry:: HygR</i>                                                                                                         |
| YW260     | <i>h90 ade6-216 leu1 ura4-D18 C24[::ura4<sup>+</sup> KanR -lacOp] his7<sup>+</sup>::LacI-GFP seb1<sup>+</sup>-mCherry:: HygR</i>                                                                                                         |
| YW309-13C | <i>h90 ade6-210 leu1 ura4-D18 seb1<sup>+</sup>-mCherry::HygR pab2<sup>+</sup>-GFP::KanR sme2proxy[::ura4<sup>+</sup>- KanR-lacOp] A55[::ura4<sup>+</sup>- KanR-lacOp] C24[::ura4<sup>+</sup>- KanR-lacOp] his7<sup>+</sup>::lacI-GFP</i> |

**Figure 2e**

|       |                                                                                                                                                                                                        |
|-------|--------------------------------------------------------------------------------------------------------------------------------------------------------------------------------------------------------|
| YW145 | <i>h-/h- ade6-216/ade6-210 lys1/lys1<sup>+</sup>::mat-Pc pat1::NatR/pat1::NatR pat1-as(L95A)::HygR/pat1-as(L95A)::HygR rhn1<sup>+</sup>-GFP::KanR/rhn1<sup>+</sup>-GFP::KanR</i>                       |
| YW146 | <i>h-/h- ade6-216/ade6-210 ura4/ura4<sup>+</sup> lys1/lys1<sup>+</sup>::mat-Pc pat1::NatR/pat1::NatR pat1-as(L95A)::HygR/pat1-as(L95A)::HygR pab2<sup>+</sup>-GFP::KanR/pab2<sup>+</sup>-GFP::KanR</i> |
| YW147 | <i>h-/h- ade6-216/ade6-210 lys1/lys1<sup>+</sup>::mat-Pc pat1::NatR/pat1::NatR pat1-as(L95A)::HygR/pat1-as(L95A)::HygR seb1<sup>+</sup>-GFP::KanR/seb1<sup>+</sup>-GFP::KanR</i>                       |

**Figure 2f-g**

|           |                                                                                                                                                                 |
|-----------|-----------------------------------------------------------------------------------------------------------------------------------------------------------------|
| YW344-14B | <i>h90 ade6-216 leu1 ura4 Δmei2::HygR A55[::ura4<sup>+</sup>-KanR-lacOp] his7<sup>+</sup>::lacI-GFP aur1-r::mei2<sup>+</sup> seb1<sup>+</sup>-mCherry::HygR</i> |
| YW346-4   | <i>h90 ade6-210 leu1 ura4 seb1<sup>+</sup>-mCherry::HygR A55[::ura4<sup>+</sup>- KanR -lacOp] his7<sup>+</sup>::lacI-GFP Δomt3::NatR</i>                        |
| YW345-19B | <i>h90 ade6-210 leu1 ura4 lys1 C24[::ura4<sup>+</sup>-lacOP- KanR] his7<sup>+</sup>::lacI-GFP seb1<sup>+</sup>-mCherry::HygR Δski3::HygR</i>                    |
| YW349     | <i>h90 ade6-210 leu1 ura4 lys1 C24[::ura4<sup>+</sup>-lacOP- KanR] his7<sup>+</sup>::lacI-GFP seb1<sup>+</sup>-mCherry::HygR Δski3&amp;SPNCRNA.584::NatR</i>    |

**Figure 3**

|           |                                                                                                                                  |
|-----------|----------------------------------------------------------------------------------------------------------------------------------|
| YY548-13C | <i>h90 ade6-216 leu1 ura4-D18 sme2proxy[::ura4<sup>+</sup>- KanR-lacOp] his7<sup>+</sup>::LacI-GFP</i>                           |
| YW289-5B  | <i>h90 ade6-216 leu1 lys1 ura4-D18 A55[::ura4<sup>+</sup>- KanR-lacOp] his7<sup>+</sup>::lacI-GFP</i>                            |
| YW592-2   | <i>h90 ade6-216 leu1 ura4-D18 lys1 C24[::ura4<sup>+</sup>- KanR-lacOp] his7<sup>+</sup>::LacI-GFP</i>                            |
| YW002     | <i>h90 ade6-216 leu1 ura4-D18 sme2proxy[::ura4<sup>+</sup>- KanR-lacOp] his7<sup>+</sup>::LacI-GFP Δrhn1:: NatR</i>              |
| YW079-8B  | <i>h90 ade6-216 leu1 ura4-DS/E seb1-5FLAG-HygR seb1-E38 sme2proxy[::ura4<sup>+</sup>- KanR-lacOp] his7<sup>+</sup>::LacI-GFP</i> |
| YW012     | <i>h90 ade6-216 leu1 ura4-D18 sme2proxy[::ura4<sup>+</sup>- KanR-lacOp] his7<sup>+</sup>::LacI-GFP Δpab2:: NatR</i>              |
| YW299-4C  | <i>h90 ade6-216 leu1 lys1 ura4-D18 A55[::ura4<sup>+</sup>- KanR-lacOp] his7<sup>+</sup>::lacI-GFP Δrhn1:: HygR</i>               |
| YW302-4D  | <i>h90 ade6-216 leu1 lys1 ura4-D18 A55[::ura4<sup>+</sup>- KanR-lacOp] his7<sup>+</sup>::lacI-GFP seb1-5FLAG-HygR seb1-E38</i>   |
| YW414-18  | <i>h90 ade6-216 leu1 lys1 ura4-D18 A55[::ura4<sup>+</sup>- KanR-lacOp] his7<sup>+</sup>::lacI-GFP Δpab2:: HygR</i>               |
| YW199-24  | <i>h90 ade6-216 leu1 lys1 ura4-D18 C24[::ura4<sup>+</sup>- KanR-lacOp] his7<sup>+</sup>::lacI-GFP Δrhn1:: HygR</i>               |
| YW288-10C | <i>h90 ade6-216 leu1 lys1 ura4-D18 C24[::ura4<sup>+</sup>- KanR-lacOp] his7<sup>+</sup>::lacI-GFP seb1-5FLAG-HygR seb1-E38</i>   |
| YW417-38  | <i>h90 ade6-216 leu1 lys1 ura4-D18 C24[::ura4<sup>+</sup>- KanR-lacOp] his7<sup>+</sup>::lacI-GFP Δpab2:: HygR</i>               |

**Figure 4**

|           |                                                                                                                      |
|-----------|----------------------------------------------------------------------------------------------------------------------|
| YY548-13C | <i>h90 ade6-216 leu1 ura4-D18 sme2proxy[::ura4<sup>+</sup>- KanR-lacOp] his7<sup>+</sup>::LacI-GFP</i>               |
| YW417     | <i>h90 ade6-210 leu1 ura4-D18 sme2proxy[::ura4<sup>+</sup>- KanR-lacOp] his7<sup>+</sup>::LacI-GFP Δrec12:: KanR</i> |
| YY656-7B  | <i>h90 ade6-216 leu1 ura4-D18 sme2proxy[::ura4<sup>+</sup>- KanR-lacOp] his7<sup>+</sup>::LacI-GFP Δsme2:: HygR</i>  |

|           |                                                                                                                                                |
|-----------|------------------------------------------------------------------------------------------------------------------------------------------------|
| YY665-16C | <i>h90 ade6-216 leu1 ura4-D18 sme2proxy[::ura4<sup>+</sup>- KanR-lacOp] his7<sup>+</sup>::LacI-GFP Δsme2:: HygR rec12-152::LEU2</i>            |
| YW002     | <i>h90 ade6-216 leu1 ura4-D18 sme2proxy[::ura4<sup>+</sup>- KanR-lacOp] his7<sup>+</sup>::LacI-GFP Δrhn1:: NatR</i>                            |
| YW079-5B  | <i>h90 ade6-216 leu1 ura4-DS/E sme2proxy[::ura4<sup>+</sup>- KanR-lacOp] his7<sup>+</sup>::LacI-GFP seb1-5FLAG- HygR seb1-E38</i>              |
| YW287-15D | <i>h90 ade6-216 leu1 ura4-D18 sme2proxy[::ura4<sup>+</sup>- KanR-lacOp] his7<sup>+</sup>::LacI-GFP Δrhn1:: NatR seb1-5FLAG- HygR seb1-E38</i>  |
| YW289-5B  | <i>h90 ade6-216 leu1 lys1 ura4-D18 A55[::ura4<sup>+</sup>- KanR-lacOp] his7<sup>+</sup>::lacI-GFP</i>                                          |
| YW286-1   | <i>h90 ade6-216 leu1 lys1 ura4-D18 A55[::ura4<sup>+</sup>- KanR-lacOp] his7<sup>+</sup>::lacI-GFP rec12-152::LEU2</i>                          |
| YW346-4   | <i>h90 ade6-216 leu1 ura4-D18 A55[::ura4<sup>+</sup>- KanR-lacOp] his7<sup>+</sup>::lacI-GFP Δomt3:: NatR</i>                                  |
| YW429     | <i>h90 ade6-210 leu1 ura4-D18 A55[::ura4<sup>+</sup>- KanR-lacOp] his7<sup>+</sup>::lacI-GFP Δomt3:: HygR rec12-152::LEU2</i>                  |
| YW299-4C  | <i>h90 ade6-216 leu1 lys1 ura4-D18 A55[::ura4<sup>+</sup>- KanR-lacOp] his7<sup>+</sup>::lacI-GFP Δrhn1:: HygR</i>                             |
| YW302-4D  | <i>h90 ade6-216 leu1 lys1 ura4-D18 A55[::ura4<sup>+</sup>- KanR-lacOp] his7<sup>+</sup>::lacI-GFP seb1-5FLAG- HygR seb1-ts125</i>              |
| YW334-30B | <i>h90 ade6-216 leu1 lys1 ura4-D18 A55[::ura4<sup>+</sup>- KanR-lacOp] his7<sup>+</sup>::lacI-GFP Δrhn1:: HygR seb1-5FLAG- HygR seb1-ts125</i> |
| YW592-2   | <i>h90 ade6-216 leu1 ura4-D18 lys1 C24[::ura4<sup>+</sup>- KanR-lacOp] his7<sup>+</sup>::LacI-GFP</i>                                          |
| YY792-2   | <i>h90 ade6-210 leu1 ura4-D18 lys1 C24[::ura4<sup>+</sup>- KanR-lacOp] his7<sup>+</sup>::LacI-GFP rec12-152::LEU2</i>                          |
| YW351-4   | <i>h90 ade6-210 leu1 ura4-D18 lys1 C24[::ura4<sup>+</sup>- KanR-lacOp] his7<sup>+</sup>::LacI-GFP ΔlncRNA584:: NatR</i>                        |
| YW430-8   | <i>h90 ade6-210 leu1 ura4-D18 lys1 C24[::ura4<sup>+</sup>- KanR-lacOp] his7<sup>+</sup>::LacI-GFP rec12-152::LEU2</i>                          |
| YW350-2A  | <i>h90 ade6-210 leu1 ura4-D18 lys1 C24[::ura4<sup>+</sup>- KanR-lacOp] his7<sup>+</sup>::LacI-GFP Δrhn1:: HygR</i>                             |
| YW288-2C  | <i>h90 ade6-216 leu1 lys1 ura4-DS/E C24[::ura4<sup>+</sup>- KanR-lacOp] his7<sup>+</sup>::lacI-GFP seb1-5FLAG- HygR seb1-E38</i>               |
| YW291-4B  | <i>h90 ade6-216 leu1 lys1 ura4-D18 C24[::ura4<sup>+</sup>- KanR-lacOp] his7<sup>+</sup>::lacI-GFP Δrhn1:: HygR seb1-5FLAG- HygR seb1-E38</i>   |

**Figure 5**

|           |                                                                                                                       |
|-----------|-----------------------------------------------------------------------------------------------------------------------|
| YW096-6B  | <i>h90 ade6-216 leu1 lys1 ura4-D18 seb1<sup>+</sup>-mCherry::HygR</i>                                                 |
| YY906-1   | <i>h90 ade6-210 leu1 lys1 ura4-D18 U1Atag-sme2::HygR aur1::Pnmt1-U1Ap-mCherry</i>                                     |
| YW289-5B  | <i>h90 ade6-216 leu1 lys1 ura4-D18 A55[::ura4<sup>+</sup>- KanR-lacOp] his7<sup>+</sup>::lacI-GFP</i>                 |
| YW286-1   | <i>h90 ade6-216 leu1 lys1 ura4-D18 A55[::ura4<sup>+</sup>- KanR-lacOp] his7<sup>+</sup>::lacI-GFP rec12-152::LEU2</i> |
| YY548-13C | <i>h90 ade6-216 leu1 ura4-D18 sme2proxy[::ura4<sup>+</sup>- KanR-lacOp] his7<sup>+</sup>::LacI-GFP</i>                |
| YW417     | <i>h90 ade6-210 leu1 ura4-D18 sme2proxy[::ura4<sup>+</sup>- KanR-lacOp] his7<sup>+</sup>::LacI-GFP ΔRec12:: KanR</i>  |
| YW592-2   | <i>h90 ade6-216 leu1 ura4-D18 lys1 C24[::ura4<sup>+</sup>- KanR-lacOp] his7<sup>+</sup>::LacI-GFP</i>                 |
| YW430-8   | <i>h90 ade6-210 leu1 ura4-D18 lys1 C24[::ura4<sup>+</sup>- KanR-lacOp] his7<sup>+</sup>::LacI-GFP rec12-152::LEU2</i> |

**Figure 6**

|          |                                                                                                                                                  |
|----------|--------------------------------------------------------------------------------------------------------------------------------------------------|
| YW289-5B | <i>h90 ade6-216 leu1 lys1 ura4-D18 A55[::ura4<sup>+</sup>- KanR-lacOp] his7<sup>+</sup>::lacI-GFP</i>                                            |
| YW346-4  | <i>h90 ade6-216 leu1 ura4-D18 A55[::ura4<sup>+</sup>- KanR-lacOp] his7<sup>+</sup>::lacI-GFP Δomt3:: NatR</i>                                    |
| YW445-2  | <i>h90 ade6-210 leu1 ura4-D18 lys1 A55[::ura4<sup>+</sup>- KanR-lacOp] his7<sup>+</sup>::lacI-GFP Δsme2:: HygR Δomt3:: sme2<sup>+</sup>-NatR</i> |

|                               |                                                                                                                                                                                             |
|-------------------------------|---------------------------------------------------------------------------------------------------------------------------------------------------------------------------------------------|
| YW441-1B                      | <i>hm ade6-210 leu1 ura4-D18 lys1 A55[::ura4<sup>+</sup>- KanR-lacOp] his7<sup>+</sup>::lacI-GFP Δsme2:: HygR</i>                                                                           |
| YW446-2D                      | <i>hp ade6-210 leu1 ura4-D18 lys1 A55[::ura4<sup>+</sup>- KanR-lacOp] his7<sup>+</sup>::lacI-GFP Δsme2:: HygR Δomt3:: sme2<sup>+</sup>-NatR</i>                                             |
| <b>Supplementary Figure 1</b> |                                                                                                                                                                                             |
| YY831-7B                      | <i>h90 ade6-210 leu1 lys1 seb1<sup>+</sup>-GFP::KanR</i>                                                                                                                                    |
| YW055-10                      | <i>h90 ade6-216 leu1 lys1 rhn1<sup>+</sup>-GFP::KanR</i>                                                                                                                                    |
| YW097-4B                      | <i>h90 ade6-216 leu1 lys1 ura4-D18 seb1<sup>+</sup>-mCherry::HygR pab2<sup>+</sup>-GFP::KanR</i>                                                                                            |
| YW364-1                       | <i>h90 ade6-216 leu1 lys1 ura4-D18 seb1<sup>+</sup>-mCherry::HygR rna15<sup>+</sup>-GFP::KanR</i>                                                                                           |
| YW096-5C                      | <i>h90 ade6-216 leu1 lys1 ura4-D18 seb1<sup>+</sup>-mCherry::HygR rhn1<sup>+</sup>-GFP::KanR</i>                                                                                            |
| YW365-2                       | <i>h90 ade6-216 leu1 lys1 ura4-D18 seb1<sup>+</sup>-mCherry::HygR pcf11<sup>+</sup>-GFP::KanR</i>                                                                                           |
| YW369-1                       | <i>h90 ade6-216 leu1 lys1 ura4-D18 seb1<sup>+</sup>-mCherry::HygR ctf1<sup>+</sup>-GFP::KanR</i>                                                                                            |
| <b>Supplementary Figure 2</b> |                                                                                                                                                                                             |
| YW061                         | <i>h90 ade6-216 leu1 ura4-D18 sme2proxy[::ura4<sup>+</sup>- KanR-lacOp] his7<sup>+</sup>::LacI-GFP lys1<sup>+</sup>:: Padh15-skp1-NLS-AtTIR1-NLS pcf11<sup>+</sup>-IAA17-mCherry:: HygR</i> |
| YW162-3                       | <i>h90 ade6-216 leu1 ura4-D18 sme2proxy[::ura4<sup>+</sup>- KanR-lacOp] his7<sup>+</sup>::LacI-GFP lys1<sup>+</sup>:: Padh15-skp1-NLS-AtTIR1-NLS rna15<sup>+</sup>-IAA17-mCherry:: HygR</i> |
| EON125                        | <i>hp ade6-210 otrR(SphI)::ura4<sup>+</sup> leu1-32 ura4-DS/E seb1-5Flag-hphMX6 seb1-E38</i>                                                                                                |
| L968                          | <i>h90</i>                                                                                                                                                                                  |
| <b>Supplementary Figure 4</b> |                                                                                                                                                                                             |
| YW448-9A                      | <i>h90 ade6-210 leu1 lys1 seb1<sup>+</sup>-GFP::KanR Δsme2::ura4<sup>+</sup> Δomt3:: KanR ΔlncRNA584:: HygR</i>                                                                             |
| <b>Supplementary Figure 6</b> |                                                                                                                                                                                             |
| PY183                         | <i>h90 ade6-216 leu1-32 rec8<sup>+</sup>::GFP-KanR</i>                                                                                                                                      |
| <b>Supplementary Figure 7</b> |                                                                                                                                                                                             |
| YY699-C6                      | <i>h90 ade6-216 leu1 lys1 ura4-D18 A37[::ura4<sup>+</sup>- KanR-lacOp] his7<sup>+</sup>::lacI-GFP</i>                                                                                       |
| YW388-2                       | <i>h90 ade6-216 leu1 lys1 ura4-D18 A37[::ura4<sup>+</sup>- KanR-lacOp] his7<sup>+</sup>::lacI-GFP C02::4XU1A-14DSR-NatR</i>                                                                 |
| YW404-22                      | <i>h90 ade6-216 leu1 lys1 ura4-D18 A37[::ura4<sup>+</sup>- KanR-lacOp] his7<sup>+</sup>::lacI-GFP C02::4XU1A-14DSR-NatR seb1<sup>+</sup>-mCherry::HygR</i>                                  |
| <b>Video 1</b>                |                                                                                                                                                                                             |
| YW096-6B                      | <i>h90 ade6-216 leu1 lys1 ura4-D18 seb1<sup>+</sup>-mCherry::HygR</i>                                                                                                                       |
| <b>Video 2</b>                |                                                                                                                                                                                             |
| YW055-10                      | <i>h90 ade6-216 leu1 lys1 ura4-D18 rhn1<sup>+</sup>-GFP::KanR</i>                                                                                                                           |
| <b>Video 3</b>                |                                                                                                                                                                                             |
| YW052-1                       | <i>h90 ade6-216 leu1 lys1 ura4-D18 rna15<sup>+</sup>-GFP::KanR</i>                                                                                                                          |
| <b>Video 4</b>                |                                                                                                                                                                                             |
| YY906-1                       | <i>h90 ade6-210 leu1 lys1 ura4-D18 U1Atag-sme2::HygR aur1::Pnmt1-U1Ap-mCherry</i>                                                                                                           |
| <b>Video 5</b>                |                                                                                                                                                                                             |
| YW289-5B                      | <i>h90 ade6-216 leu1 lys1 ura4-D18 A55[::ura4<sup>+</sup>- KanR-lacOp] his7<sup>+</sup>::lacI-GFP</i>                                                                                       |
| <b>Video 6</b>                |                                                                                                                                                                                             |
| YW592-2                       | <i>h90 ade6-216 leu1 ura4-D18 lys1 C24[::ura4<sup>+</sup>- KanR-lacOp] his7<sup>+</sup>::LacI-GFP</i>                                                                                       |

All strains are constructed in this study, except for PY183 (Watanabe & Nurse, 1999).

### Supplementary Table 3. List of primers for gene disruption

#### *mei2* deletion

Forward1: GCATTGAGCCGTCATTGATC

Reverse1: cggcggggacgaggcaagctTTACGAAAGAGATCCTGTATTG

Forward2: gataactaacgccgccatccagtTTATGTGTTAAAACGGCAACAA

Reverse2: CTAACAACCATCTAACCCTTCC

#### *omt3* deletion

Forward: CGCCGCATTTCGATTTTAAATGTATCACGTATAAATCGGTAAATATGTGTGTACCACGGT  
TGTAGAAGTGCTCGAAGACAAagcttgccctcgtccccgccg

Reverse: CCTAATTTTTTAAAAGTTTATCGACTTGGCTTCAACACATAGTGCTTCTATAAGTAAACA  
AACATGTTTTTAAAACAAGATAactggatggcggcggttagt

#### *ski3* deletion

Forward1: CACTCCTTGGGTTCTCTATC

Reverse1: cggcggggacgaggcaagctGACAATGGCAGTTTATTATG

Forward2: gataactaacgccgccatccaGAACTTGTATTTATTATCAA

Reverse2: GAATCTGACAGTTCATTAGC

#### *ski3-lncRNA584* deletion

Forward1: CACTCCTTGGGTTCTCTATC

Reverse1: cggcggggacgaggcaagctGACAATGGCAGTTTATTATG

Forward2: gataactaacgccgccatccaGAACTTGTATTTATTATCAA

Reverse2: AACCTTTTACTTGTATTATAAGCGCCAATAATTGGCTGTTTGAATTTCAACCCACTGC  
TAAATCGATGACGAATTACGCTGactggatggcggcggttagt

#### *rhn1* deletion

Forward: TTTATTACTTATGCTTATGATTTTCGTTTGCATGCTAACAGCAGTGTGTCGTAAGAAA  
CTCACCATCAGCATAAAACAAGagcttgccctcgtccccgccg

Reverse: TGACTAAGACTGCCACATTGATTGACAGTTTAAAAAAGAAAAATAATGAAAAC  
TAAGCATTACATTTTCATGGATTactggatggcggcggttagta

#### *pab2* deletion

Forward1: TATAAGCAGGCAGTCCAAATCCT

Reverse1: ttaattaacccggggatccgTTTTTCAAATTTTCTGCTAC

Forward2: gataactaacgccgccatccaGTAATCGCTTTGATGACTT

Reverse2: GAATTACATTATGTCAGCATAT

#### *ctf1* deletion

Forward1: GTACTTACCATGAATTGTCCC

Reverse1: cggcggggacgaggcaagctGCTGGTAGTCGCGTCTTTTCG

Forward2: gataactaacgccgccatccaGTCTAATTTTAGTAATATCA

Reverse2: GTTGATGTTACCACCTAC

#### *rdl* deletion

Forward1: ACGCATAGCACGAGGACTGAAATT

Reverse1: ttaattaacccggggatccgTTTTTCTAGAATGCGGGAAA

Forward2: gataactaacgccgccatccaCTGCCCTTCGTTTCTATCTG

Reverse2: ATCAGAGTAAGTTCTGTCCT

#### *nab3* deletion

Forward1: CTTTACACATTTGGTTGAGTGT

Reverse1: ttaattaacccggggatccgTTATTGATTGACTTGAAAAG

Forward2: gataactaacgccgccatccaCAAGTGTTTTAGGTAGCAC

Reverse2: CAGTAAAAATCAAGTATCGAAAC

#### *rmn1* deletion

Forward1: TCTCATAATCGTCAGAGTTTGA

Reverse1: ttaattaacccggggatccgTGTGATGGAGCAAAGTGCT

Forward2: gataactaacgccgccatccaCTGCATTGTATGCGGCTGTC

Reverse2: CATGAGTTTTCTCTCCTAGCCG

**Supplementary Table 4. List of smFISH probes**

|         |                      |             |                       |             |                       |
|---------|----------------------|-------------|-----------------------|-------------|-----------------------|
| sme2_1  | ataccactaagtctgttta  | ncRNA130_1  | gttattaatgctcctctt    | ncRNA584_1  | cgltctatcctaagagtgga  |
| sme2_2  | cggcagaagattgaccaaca | ncRNA130_2  | gaattcccaacctctttta   | ncRNA584_2  | tgctgacactctacgatcat  |
| sme2_3  | gcatattcgccttacaata  | ncRNA130_3  | cgcttttactctttttgt    | ncRNA584_3  | tatagtgccacgaatcgttc  |
| sme2_4  | accaactaaagcgatcttc  | ncRNA130_4  | atctttatcatgcataca    | ncRNA584_4  | tctgcacttttgagctttt   |
| sme2_5  | gaccatttcaaaatgttgca | ncRNA130_5  | tcaaaaaccatcatcagcct  | ncRNA584_5  | goggcataaatattgtccac  |
| sme2_6  | taccgaatccagcttttga  | ncRNA130_6  | agcaacatcgctaatgatca  | ncRNA584_6  | cagattggcaaatatccggat |
| sme2_7  | cagagcttagaagacaaggt | ncRNA130_7  | ttcactgactctgcctttac  | ncRNA584_7  | caatccaaccactcactca   |
| sme2_8  | taactggaccccatcaagaa | ncRNA130_8  | actcagcaaaagcttaactct | ncRNA584_8  | cttacctagagccattttt   |
| sme2_9  | taaaccaacttgggggttg  | ncRNA130_9  | tacgaacgcattgtcccaa   | ncRNA584_9  | tgcttaccgtgtacgaatc   |
| sme2_10 | tctaagctactattcatcca | ncRNA130_10 | acaattcgtcacgtacatca  | ncRNA584_10 | gatgctctgtaggaactgt   |
| sme2_11 | agtagattccatcagtcata | ncRNA130_11 | tcaggcctcattttttta    | ncRNA584_11 | actcatgaggcactagttc   |
| sme2_12 | tgcaaccaaaaagtgtacca | ncRNA130_12 | accatagagatagaagcggt  | ncRNA584_12 | tcagctctatggttgcaaa   |
| sme2_13 | catgtaagtgtcttcaagg  | ncRNA130_13 | gttcttctcctcaaatctca  | ncRNA584_13 | cttcacgaccagacgattg   |
| sme2_14 | ttcagctatccgcaaatgt  | ncRNA130_14 | acaagattcctcttaggttt  | ncRNA584_14 | gcatttgctactactgtgta  |
| sme2_15 | agtcgttttattcttttct  | ncRNA130_15 | gtcatgtgatttttcatcc   | ncRNA584_15 | accgttatgtctcaaagtct  |
| sme2_16 | gtttcaacaatagttcaggt | ncRNA130_16 | gtttcgctccaagatgat    | ncRNA584_16 | gcttctagttgacttact    |
| sme2_17 | tctgttcaggaatacgttt  | ncRNA130_17 | aagctctcaactcctttc    | ncRNA584_17 | ctgtatgctctgcgattgaa  |
| sme2_18 | gtttcgcatacaactttca  | ncRNA130_18 | aattcctttgctgactgaca  | ncRNA584_18 | gtcttggtgcaatagctatt  |
| sme2_19 | gcgtttaacaaactgcggg  | ncRNA130_19 | aaggtttcttcacgtcact   | ncRNA584_19 | caagccgaaggaacaatt    |
| sme2_20 | tggttcagcacgtttcaa   | ncRNA130_20 | ttctcgagaagcatgaagca  | ncRNA584_20 | agtatccaaggtgtatggg   |
| sme2_21 | ttggttgtagggtttaacg  | ncRNA130_21 | ataaaaacccaagaccgct   | ncRNA584_21 | tgagcgattcaaatgccgac  |
| sme2_22 | tgaattagctgtctgtggt  | ncRNA130_22 | ccaaatcaaatgggacct    | ncRNA584_22 | ttaaaccgactacccttgga  |
| sme2_23 | ccaatgaacataaccattgt | ncRNA130_23 | ttaggttctcactgcagcaac | ncRNA584_23 | gatgcaaaaagccttactcgg |
| sme2_24 | aagagggagcacagcacaac | ncRNA130_24 | ggtgagacttagcttacgag  | ncRNA584_24 | cttcctactagaacacctt   |
| sme2_25 | atgtgtgctattctctct   | ncRNA130_25 | aacctcctgtttgcataaga  | ncRNA584_25 | tctggggaaaatccaaccg   |
| sme2_26 | gaaggcatgttgaattgga  | ncRNA130_26 | acatggatcaatcatccatt  | ncRNA584_26 | catgcagtaaacaccgagga  |
| sme2_27 | attaatagctgtccttgcg  |             |                       | ncRNA584_27 | ttgatctattcggaaggca   |
| sme2_28 | ccttaaagtggttttaagc  |             |                       | ncRNA584_28 | ttctatctctattgaccag   |
