# Supplementary material for: Chromosome-associated RNA–protein complexes promote pairing of homologous chromosomes during meiosis in Schizosaccharomyces pombe
Source: PubMed Central journal article supplement (PMC6898681; doi:10.1038/s41467-019-13609-0), 2019-12-06
Supplement: 41467_2019_13609_MOESM3_ESM.pdf [file 41467_2019_13609_MOESM3_ESM.pdf]

### **Description of Additional Supplementary Files**

File Name: Supplementary Data 1

Description: ChIP-seq data of three Smp proteins in meiotic and vegetative growth.

File Name: Supplementary Movie 1

Description: Disappearance of Seb1-mCherry dots in the meiotic prophase nucleus upon 1,6-hexanediol treatment.

File Name: Supplementary Movie 2

Description: Disappearance of Rhn1-GFP dots in the meiotic prophase nucleus upon 1,6-hexanediol treatment.

File Name: Supplementary Movie 3

Description: Disappearance of Rna15-GFP dots in the meiotic prophase nucleus upon 1,6-hexanediol treatment.

File Name: Supplementary Movie 4

Description: Scattering of sme2-RNA focus upon 1,6-hexanediol treatment.

File Name: Supplementary Movie 5

Description: Separation of the paired A55 locus upon 1,6-hexanediol treatment.

File Name: Supplementary Movie 6

Description: Separation of the paired C24 locus upon 1,6-hexanediol treatment.
