# Supplementary material for: Chromosome-associated RNA–protein complexes promote pairing of homologous chromosomes during meiosis in Schizosaccharomyces pombe
Source: PubMed Central journal article supplement (PMC6898681; doi:10.1038/s41467-019-13609-0), 2019-12-06
Supplement: 41467_2019_13609_MOESM11_ESM.pdf [file 41467_2019_13609_MOESM11_ESM.pdf]

## Reporting Summary

Nature Research wishes to improve the reproducibility of the work that we publish. This form provides structure for consistency and transparency in reporting. For further information on Nature Research policies, see [Authors & Referees](#) and the [Editorial Policy Checklist](#).

### Statistics

For all statistical analyses, confirm that the following items are present in the figure legend, table legend, main text, or Methods section.

n/a Confirmed

- |                                     |                                     |                                                                                                                                                                                                                                                            |
|-------------------------------------|-------------------------------------|------------------------------------------------------------------------------------------------------------------------------------------------------------------------------------------------------------------------------------------------------------|
| <input type="checkbox"/>            | <input checked="" type="checkbox"/> | The exact sample size ( $n$ ) for each experimental group/condition, given as a discrete number and unit of measurement                                                                                                                                    |
| <input type="checkbox"/>            | <input checked="" type="checkbox"/> | A statement on whether measurements were taken from distinct samples or whether the same sample was measured repeatedly                                                                                                                                    |
| <input checked="" type="checkbox"/> | <input type="checkbox"/>            | The statistical test(s) used AND whether they are one- or two-sided<br><i>Only common tests should be described solely by name; describe more complex techniques in the Methods section.</i>                                                               |
| <input checked="" type="checkbox"/> | <input type="checkbox"/>            | A description of all covariates tested                                                                                                                                                                                                                     |
| <input checked="" type="checkbox"/> | <input type="checkbox"/>            | A description of any assumptions or corrections, such as tests of normality and adjustment for multiple comparisons                                                                                                                                        |
| <input type="checkbox"/>            | <input checked="" type="checkbox"/> | A full description of the statistical parameters including central tendency (e.g. means) or other basic estimates (e.g. regression coefficient) AND variation (e.g. standard deviation) or associated estimates of uncertainty (e.g. confidence intervals) |
| <input checked="" type="checkbox"/> | <input type="checkbox"/>            | For null hypothesis testing, the test statistic (e.g. $F$ , $t$ , $r$ ) with confidence intervals, effect sizes, degrees of freedom and $P$ value noted<br><i>Give <math>P</math> values as exact values whenever suitable.</i>                            |
| <input checked="" type="checkbox"/> | <input type="checkbox"/>            | For Bayesian analysis, information on the choice of priors and Markov chain Monte Carlo settings                                                                                                                                                           |
| <input checked="" type="checkbox"/> | <input type="checkbox"/>            | For hierarchical and complex designs, identification of the appropriate level for tests and full reporting of outcomes                                                                                                                                     |
| <input checked="" type="checkbox"/> | <input type="checkbox"/>            | Estimates of effect sizes (e.g. Cohen's $d$ , Pearson's $r$ ), indicating how they were calculated                                                                                                                                                         |

*Our web collection on [statistics for biologists](#) contains articles on many of the points above.*

### Software and code

Policy information about [availability of computer code](#)

Data collection

Imaging data were collected using SoftWorx (GE)

Data analysis

Image data analysis was using SoftWorx (GE). Chromatic shifts were corrected by using the "Chromagnion" software (<https://github.com/macronucleus/Chromagnion>)

For manuscripts utilizing custom algorithms or software that are central to the research but not yet described in published literature, software must be made available to editors/reviewers. We strongly encourage code deposition in a community repository (e.g. GitHub). See the Nature Research [guidelines for submitting code & software](#) for further information.

### Data

Policy information about [availability of data](#)

All manuscripts must include a [data availability statement](#). This statement should provide the following information, where applicable:

- Accession codes, unique identifiers, or web links for publicly available datasets
- A list of figures that have associated raw data
- A description of any restrictions on data availability

The authors declare that all the other data supporting the findings of this study are available within the paper and its supplementary information files, and from the corresponding author upon reasonable request.

## Field-specific reporting

Please select the one below that is the best fit for your research. If you are not sure, read the appropriate sections before making your selection.

- Life sciences     Behavioural & social sciences     Ecological, evolutionary & environmental sciences

For a reference copy of the document with all sections, see [nature.com/documents/nr-reporting-summary-flat.pdf](https://www.nature.com/documents/nr-reporting-summary-flat.pdf)

## Life sciences study design

All studies must disclose on these points even when the disclosure is negative.

|                 |                                                                                                                                                                                                                                                                                                                                                                                                                 |
|-----------------|-----------------------------------------------------------------------------------------------------------------------------------------------------------------------------------------------------------------------------------------------------------------------------------------------------------------------------------------------------------------------------------------------------------------|
| Sample size     | <input type="text" value="The sample size is provided in Source Data files."/>                                                                                                                                                                                                                                                                                                                                  |
| Data exclusions | <input type="text" value="No data were excluded from analyses."/>                                                                                                                                                                                                                                                                                                                                               |
| Replication     | <input type="text" value="For following pairing of homologous chromosome in live cells, experiments were repeated until data were successfully collected from at least 18 cells. For counting fluorescent signals in live or fixed cells, independent experiments were repeated for three times, and all replication were successful. The precise number of cells examined is provided in Source Data files."/> |
| Randomization   | <input type="text" value="NA"/>                                                                                                                                                                                                                                                                                                                                                                                 |
| Blinding        | <input type="text" value="NA"/>                                                                                                                                                                                                                                                                                                                                                                                 |

## Reporting for specific materials, systems and methods

We require information from authors about some types of materials, experimental systems and methods used in many studies. Here, indicate whether each material, system or method listed is relevant to your study. If you are not sure if a list item applies to your research, read the appropriate section before selecting a response.

### Materials & experimental systems

| n/a                                 | Involvement in the study                             |
|-------------------------------------|------------------------------------------------------|
| <input type="checkbox"/>            | <input checked="" type="checkbox"/> Antibodies       |
| <input checked="" type="checkbox"/> | <input type="checkbox"/> Eukaryotic cell lines       |
| <input checked="" type="checkbox"/> | <input type="checkbox"/> Palaeontology               |
| <input checked="" type="checkbox"/> | <input type="checkbox"/> Animals and other organisms |
| <input checked="" type="checkbox"/> | <input type="checkbox"/> Human research participants |
| <input checked="" type="checkbox"/> | <input type="checkbox"/> Clinical data               |

### Methods

| n/a                                 | Involvement in the study                        |
|-------------------------------------|-------------------------------------------------|
| <input type="checkbox"/>            | <input checked="" type="checkbox"/> ChIP-seq    |
| <input checked="" type="checkbox"/> | <input type="checkbox"/> Flow cytometry         |
| <input checked="" type="checkbox"/> | <input type="checkbox"/> MRI-based neuroimaging |

## Antibodies

|                 |                                                                                                                                                                                                                                                             |
|-----------------|-------------------------------------------------------------------------------------------------------------------------------------------------------------------------------------------------------------------------------------------------------------|
| Antibodies used | <input type="text" value="Full-length A.v. polyclonal GFP antibody (632460; Clontech, Mountain View, CA, USA), anti-Flag M2 antibody (A8592, Merck), anti-α-tubulin (T5168, Merck), peroxidase-conjugated AffiPure anti-mouse IgG (515-035-072, Jackson)"/> |
| Validation      | <input type="text" value="https://www.takarabio.com/assets/documents/Certificate%20of%20Analysis/632592-632593-072412.pdf"/>                                                                                                                                |

## ChIP-seq

### Data deposition

- Confirm that both raw and final processed data have been deposited in a public database such as [GEO](https://www.ncbi.nlm.nih.gov/sra/).
- Confirm that you have deposited or provided access to graph files (e.g. BED files) for the called peaks.

|                                                                               |                                                                               |
|-------------------------------------------------------------------------------|-------------------------------------------------------------------------------|
| Data access links<br><i>May remain private before publication.</i>            | <input type="text" value="https://www.ncbi.nlm.nih.gov/sra/?term=SRP129475"/> |
| Files in database submission                                                  | <input type="text" value="SRR6472706~SRR6472717"/>                            |
| Genome browser session<br>(e.g. <a href="https://www.pombase.org/">UCSC</a> ) | <input type="text" value="https://www.pombase.org/"/>                         |

## Methodology

Replicates

One replicate for each ChIP-input sample pair

Sequencing depth

Average reads 6892222, mapped unique 98.45%, unmapped 1.59%, average read length=51

Antibodies

Full-length A.v. polyclonal GFP antibody (632460; Clontech, Mountain View, CA, USA)

Peak calling parameters

Fold enrichments (ChIP/WCE) of more than 1.5 for each 100-bp window

Data quality

Peak numbers:  
Rhn1-mito 1901, Rhn1-meio, 2794; Pab2-mito 1042, Pab2-meio 1446; Seb1-mito 1817, Seb1-meio 2714

Software

Mapping: bowtie (<http://bowtie-bio.sourceforge.net/index.shtml>), visualization and peak calling: DROMPA (<https://github.com/rnakato/DROMPA3>).
